# Supplementary material for: A new and efficient procedure for the synthesis of hexahydropyrimidine-fused 1,4-naphthoquinones
Source: publisher site journal article supplement (doi:10.3762/bjoc.11.137), 2015-07-22

# Supporting Information

for

## A new and efficient procedure for the synthesis of hexahydropyrimidine-fused 1,4-naphthoquinones

Marcelo Isidoro P. Reis<sup>1</sup>, Vinícius R. Campos<sup>1</sup>, Jackson A. L. C. Resende<sup>2</sup>, Fernando C. Silva<sup>1</sup> and Vitor F. Ferreira<sup>1,\*</sup>

Address: <sup>1</sup>Universidade Federal Fluminense, Departamento de Química Orgânica, Campus do Valonguinho, 24020-150, Niterói, RJ, Brazil and <sup>2</sup>Universidade Federal Fluminense, Departamento de Química Inorgânica, Campus do Valonguinho, 24020-150, Niterói, RJ, Brazil

Email: Vitor F. Ferreira - [ceguito@vm.uff.br](mailto:ceguito@vm.uff.br)

\*Corresponding author

### Experimental procedures and spectral data

#### Table of contents

|                                                                           |    |
|---------------------------------------------------------------------------|----|
| General procedure for the preparation of <b>14–19</b> .....               | S2 |
| General procedure for the preparation of <b>13</b> and <b>21–25</b> ..... | S4 |
| References .....                                                          | S8 |
| Spectral data .....                                                       | S9 |

## General procedure for the preparation of 1,3,5-triazinanes 14–19

To a round-bottomed flask (125 mL) equipped with a reflux condenser was added the appropriate amine (0.05 mmol), toluene (40 mL) and formaldehyde (37%, 4.1 mL). The solution was brought to reflux using an external oil bath and kept stirring for 30 min. Then, the toluene was evaporated under reduced pressure, and the residue was dissolved in ethyl acetate and washed with a saturated aqueous solution of sodium chloride. After evaporation of the solvent under reduced pressure in a rotary evaporator, the residue was purified by silica gel column chromatography using hexane/ethyl acetate 9:1 as the eluent [1].

1,3,5-Tributyl-1,3,5-triazinane (**14**) was isolated as oil in 75% yield. IR  $\nu_{\max}$  ( $\text{cm}^{-1}$ , film): 2955, 2929, 2862, 2791, 1684, 1466, 1374, 1304, 1261, 1240, 1192, 1141, 1109, 1012, 969, 952, 912, 869, 802, 734, 665.  $^1\text{H}$  NMR (500 MHz,  $\text{CDCl}_3$ )  $\delta$  (ppm): 0.84 (9H, t,  $J$  7.2 Hz), 1.20-1.43 (12H, m), 2.28-2.36 (6H, m), 3.23 (6H, s).  $^{13}\text{C}$  NMR (APT, 125 MHz,  $\text{CDCl}_3$ )  $\delta$  (ppm): 13.8, 20.5, 29.6, 52.4, 74.6.

1,3,5-Tripentyl-1,3,5-triazinane (**15**) was isolated as oil in 89% yield. IR  $\nu_{\max}$  ( $\text{cm}^{-1}$ , film): 2955, 2928, 2859, 2790, 1463, 1375, 1226, 1182, 1141, 1110, 1016, 982, 920, 900, 728.  $^1\text{H}$  NMR (500 MHz,  $\text{CDCl}_3$ )  $\delta$  (ppm): 0.88 (9H, t,  $J$  7.3 Hz), 1.26-1.34 (12H, m), 1.46 (6H, pent,  $J$  7.3 Hz), 2.38-2.41 (6H, m), 3.29 (6H, s).  $^{13}\text{C}$  NMR (APT, 125 MHz,  $\text{CDCl}_3$ )  $\delta$  (ppm): 14.1, 20.8, 29.9, 52.7, 74.0.

1,3,5-Tridecyl-1,3,5-triazinane (**16**) was isolated as oil in 70% yield. IR  $\nu_{\max}$  ( $\text{cm}^{-1}$ , film): 2954, 2921, 2852, 2800, 1466, 1366, 1301, 1263, 1209, 1119, 1011, 979, 918, 721.  $^1\text{H}$  NMR (500 MHz,  $\text{DMSO-D}_6$ )  $\delta$  (ppm): 0.88 (9H, t,  $J$  6.7 Hz), 1.26-1.47 (48H, m), 2.35-2.42 (6H, m), 3.29 (6H, s).  $^{13}\text{C}$  NMR (APT, 125 MHz,  $\text{DMSO-D}_6$ )  $\delta$  (ppm): 14.0, 22.6, 27.4, 27.5, 29.2, 29.4, 29.5, 31.8, 52.7, 74.6.

1,3,5-Tribenzyl-1,3,5-triazinane (**17**) was isolated as white solid in 90% yield. m.p. 44-46 °C, (lit. 43-46 °C). **Fehler! Textmarke nicht definiert.** IR  $\nu_{\max}$  ( $\text{cm}^{-1}$ , KBr): 3022, 2851, 2805, 2774, 1602, 1494, 1452, 1397, 1356, 1314, 1260, 1169, 1151, 1119, 1065, 1029, 1014, 920, 907, 878, 853, 736, 704, 697.  $^1\text{H}$  NMR (500 MHz,

CDCl<sub>3</sub>)  $\delta$  (ppm): 3.42 (6H, s), 3.67 (6H, s), 7.18-7.32 (15H, m). <sup>13</sup>C NMR (APT, 125 MHz, CDCl<sub>3</sub>)  $\delta$  (ppm): 56.9, 73.6, 126.8, 128.1, 128.7, 138.2.

1,3,5-Tris(4-chlorobenzyl)-1,3,5-triazinane (**18**) was isolated as white solid oil in 85% yield. m.p. 94-95 °C. IR  $\nu_{\max}$  (cm<sup>-1</sup>, KBr): 2813, 1596, 1487, 1448, 1403, 1349, 1249, 1158, 1085, 1014, 976, 915, 882, 837, 801, 714, 655. <sup>1</sup>H NMR (500 MHz, CDCl<sub>3</sub>)  $\delta$  (ppm): 3.37 (6H, s), 3.59 (6H, s), 7.19-7.25 (12H, m). <sup>13</sup>C NMR (APT, 125 MHz, CDCl<sub>3</sub>)  $\delta$  (ppm): 56.4, 73.6, 128.6, 130.3, 133.1, 136.9.

**Table S1.** Crystallographic data of compound **18**:

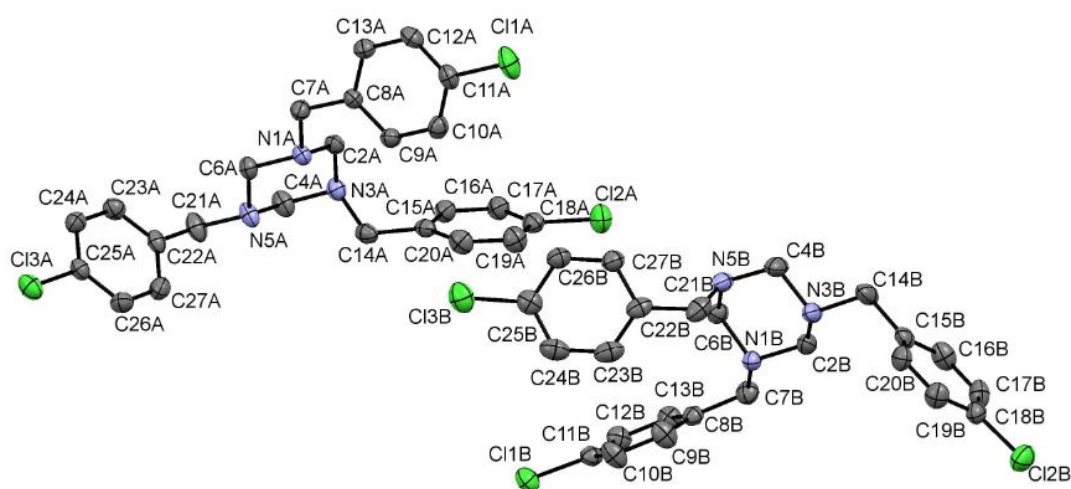

|                                       |                                                                |
|---------------------------------------|----------------------------------------------------------------|
| Empirical formula                     | C <sub>24</sub> H <sub>24</sub> Cl <sub>3</sub> N <sub>3</sub> |
| Formula weight                        | 460.81                                                         |
| Temperature/K                         | 293(2)                                                         |
| Crystal system                        | Triclinic                                                      |
| Space group                           | P-1                                                            |
| a/Å                                   | 9.7908(15)                                                     |
| b/Å                                   | 15.489(2)                                                      |
| c/Å                                   | 15.519(2)                                                      |
| $\alpha$ /°                           | 83.337(5)                                                      |
| $\beta$ /°                            | 78.500(5)                                                      |
| $\gamma$ /°                           | 83.738(5)                                                      |
| Volume/Å <sup>3</sup>                 | 2281.8(6)                                                      |
| Z                                     | 4                                                              |
| $\rho_{\text{calc}}$ /cm <sup>3</sup> | 1.341                                                          |
| $\mu$ /mm <sup>-1</sup>               | 0.418                                                          |
| F(000)                                | 960.0                                                          |

|                                                  |                                                                        |
|--------------------------------------------------|------------------------------------------------------------------------|
| Crystal size/mm <sup>3</sup>                     | 0.60 × 0.43 × 0.12                                                     |
| Radiation                                        | MoK $\alpha$ ( $\lambda$ = 0.71073)                                    |
| 2 $\Theta$ range for data collection/ $^{\circ}$ | 3.96 to 51.596                                                         |
| Index ranges                                     | -11 $\leq$ h $\leq$ 11, -18 $\leq$ k $\leq$ 18, -18 $\leq$ l $\leq$ 18 |
| Reflections collected                            | 40337                                                                  |
| Independent reflections                          | 8719 [ $R_{\text{int}}$ = 0.0626, $R_{\text{sigma}}$ = 0.0435]         |
| Data/restraints/parameters                       | 8719/0/541                                                             |
| Goodness-of-fit on $F^2$                         | 0.996                                                                  |
| Final R indexes [ $I \geq 2\sigma(I)$ ]          | $R_1$ = 0.0483, $wR_2$ = 0.1337                                        |
| Final R indexes [all data]                       | $R_1$ = 0.0925, $wR_2$ = 0.1628                                        |
| Largest diff. peak/hole / e $\text{\AA}^{-3}$    | 0.37/-0.35                                                             |

1,3,5-Tris(2,4-dichlorobenzyl)-1,3,5-triazinane (**19**) was isolated as white solid in 88% yield. m.p. 102-103 °C. IR  $\nu_{\text{max}}$  (cm<sup>-1</sup>, KBr): 1586, 1469, 1383, 1336, 1251, 1202, 1163, 1097, 1014, 981, 924, 855, 819, 765, 733, 657. <sup>1</sup>H NMR (500 MHz, DMSO-D<sub>6</sub>)  $\delta$  (ppm): 3.51 (6H, s), 3.76 (6H, s), 7.17 (3H, dd,  $J$  1.8 and 8.2 Hz), 7.33-7.63 (6H, m). <sup>13</sup>C NMR (APT, 125 MHz, DMSO-D<sub>6</sub>)  $\delta$  (ppm): 53.3, 73.6, 127.1, 129.5, 131.3, 133.6, 134.8, 135.1.

### General procedure for the preparation of 1,3-quinazoline derivatives **13** and **21–25**

An equimolar mixture of lawsone (**20**, 2.87 mmol) and the appropriate 1,3,5-triazinane (2.87 mmol) dissolved in chloroform (6 mL) was placed in a 10 mL microwave vial. The reaction was irradiated for 15 minutes at 150 °C in a microwave apparatus for synthesis. Afterwards TLC control indicated complete consumption of the starting materials and the formation of quinazolines **13** and **21–25**. The products were subsequently purified by column chromatography using hexane/ethyl acetate 98:2 as the eluent.

1,3-Dibutyl-1,2,3,4-tetrahydrobenzo[*g*]quinazoline-5,10-dione (**13**) was isolated as oil in 75% yield. IR  $\nu_{\text{max}}$  (cm<sup>-1</sup>, film): 2956, 2930, 2870, 1670, 1615, 1592, 1548, 1458, 1367, 1270, 1231, 1157, 1106, 932, 789, 721, 685; <sup>1</sup>H NMR (500 MHz, CDCl<sub>3</sub>)  $\delta$  (ppm): 0.86 (3H, t,  $J$  7.0 Hz), 0.91 (3H, t,  $J$  7.0 Hz), 1.24-1.38 (4H, m), 1.44-1.51 (2H, m), 1.54-1.65 (2H, m), 2.44-2.49 (2H, m), 3.53-3.58 (2H, m), 3.71 (2H, s), 3.96 (2H, s), 7.50 (1H, dt,  $J$  1.5 and 7.6 Hz), 7.58 (1H, dt, 1H,  $J$  1.5, 7.6 Hz), 7.87-7.90

(1H, m), 7.93-7.96 (1H, m).  $^{13}\text{C}$  NMR (APT, 125 MHz,  $\text{CDCl}_3$ )  $\delta$  (ppm): 13.7, 13.8, 20.0, 20.3, 29.7, 31.6, 48.2, 51.6, 53.0, 71.0, 113.4, 125.0, 125.9, 131.6, 131.9, 132.5, 133.6, 146.4, 180.6, 182.0. HRESIMS  $m/z$ :  $(\text{M}+\text{H})^+$  327.2217 (Calculated for  $\text{C}_{20}\text{H}_{27}\text{N}_2\text{O}_2$ : 327.2073).

1,3-Pentyl-1,2,3,4-tetrahydrobenzo[*g*]quinazoline-5,10-dione (**21**) was isolated as an oil in 77% yield. IR  $\nu_{\text{max}}$  ( $\text{cm}^{-1}$ , film): 2926, 2856, 1671, 1618, 1593, 1552, 1379, 1266, 1106, 722;  $^1\text{H}$  NMR (500 MHz,  $\text{CDCl}_3$ )  $\delta$  (ppm): 0.83 (3H, t,  $J$  6.8 Hz), 0.86 (3H, t,  $J$  6.8 Hz), 1.24-1.34 (8H, m), 1.59-1.65 (6H, m), 2.45 (2H, m), 3.55 (2H, m), 3.71 (2H, s), 3.96 (2H, s), 7.50 (1H, dt,  $J$  1.5 and 7.8 Hz), 7.58 (1H, dt, 1H,  $J$  1.5, 7.6 Hz), 7.87-7.89 (1H, m), 7.94-7.95 (1H, m).  $^{13}\text{C}$  NMR (APT, 125 MHz,  $\text{CDCl}_3$ )  $\delta$  (ppm): 13.9, 22.4, 22.4, 27.3, 28.9, 29.2, 29.4, 29.6, 48.3, 51.9, 53.3, 71.0, 113.5, 125.0, 126.0, 131.6, 131.9, 132.6, 133.6, 146.4, 180.7, 182.0. HRESIMS  $m/z$ :  $(\text{M}+\text{H})^+$  355.2592 (Calculated for  $\text{C}_{22}\text{H}_{30}\text{N}_2\text{O}_2$ : 355.2386).

1,3-Decyl-1,2,3,4-tetrahydrobenzo[*g*]quinazoline-5,10-dione (**22**) was isolated as an oil in 80% yield. IR  $\nu_{\text{max}}$  ( $\text{cm}^{-1}$ , film): 2921, 2851, 1670, 1619, 1592, 1551, 1465, 1370, 1335, 1267, 1109, 1024, 964, 843, 787, 685;  $^1\text{H}$  NMR (500 MHz,  $\text{CDCl}_3$ )  $\delta$  (ppm): 0.85-0.90 (6H, m), 1.34-1.26 (28H, m), 1.51-1.72 (4H, m), 2.49-2.54 (2H, m), 3.58-3.64 (2H, m), 3.78 (2H, s), 4.03 (2H, s), 7.56 (1H, ddd,  $J$  1.4, 7.4 and 8.9 Hz), 7.64 (1H, ddd, 1H,  $J$  1.4, 7.4 and 8.9 Hz), 7.95 (ddd, 1H,  $J$  0.5, 1.5 and 7.4 Hz), 8.01 (1H, ddd,  $J$  0.5, 1.5 and 7.4 Hz).  $^{13}\text{C}$  NMR (APT, 125.0 MHz,  $\text{CDCl}_3$ )  $\delta$  (ppm): 14.1, 22.6, 26.9, 27.3, 27.8, 29.3, 29.4, 29.5, 29.5, 29.6, 29.6, 31.8, 48.4, 52.0, 53.4, 71.0, 113.5, 125.1, 126.0, 131.7, 132.0, 132.7, 133.7, 146.5, 180.7, 182.1. HRESIMS  $m/z$ :  $(\text{M}+\text{H})^+$  495.4422 (Calculated for  $\text{C}_{32}\text{H}_{50}\text{N}_2\text{O}_2$ : 495.3951).

1,3-Dibenzyl-1,2,3,4-tetrahydrobenzo[*g*]quinazoline-5,10-dione (**23**) was isolated as a red solid in 80% yield. m.p. 117-118  $^\circ\text{C}$ . IR  $\nu_{\text{max}}$  ( $\text{cm}^{-1}$ , KBr): 2949, 2930, 2837, 1657, 1623, 1588, 1556, 1453, 1381, 1357, 1293, 1272, 1250, 1232, 1209, 1108, 1080, 1065, 940, 751, 726, 720, 701.  $^1\text{H}$  NMR (500 MHz,  $\text{CDCl}_3$ )  $\delta$  (ppm): 3.60 (2H, s), 3.77 (2H, s), 3.84 (2H, s), 4.75 (2H, s), 7.16-7.27 (10H, m), 7.53 (1H, dt,  $J$  1.5 and 7.8 Hz), 7.60 (1H, dt,  $J$  1.5 and 7.8 Hz), 7.91 (1H, dd,  $J$  1.5 and 7.8 Hz), 7.97 (dd, 1H,  $J$  1.5 and 7.8 Hz).  $^{13}\text{C}$  NMR (APT, 125 MHz,  $\text{CDCl}_3$ )  $\delta$  (ppm): 48.7, 54.6, 57.6, 68.9,

116.1, 125.2, 126.2, 127.3, 127.3, 127.5, 128.3, 128.5, 128.8, 132.0, 132.4, 133.7, 137.3, 137.6, 146.8, 181.2, 181.9. HRESIMS  $m/z$ :  $(M+H)^+$  395.2062 (Calculated for  $C_{26}H_{22}N_2O_2$ : 395.1760).

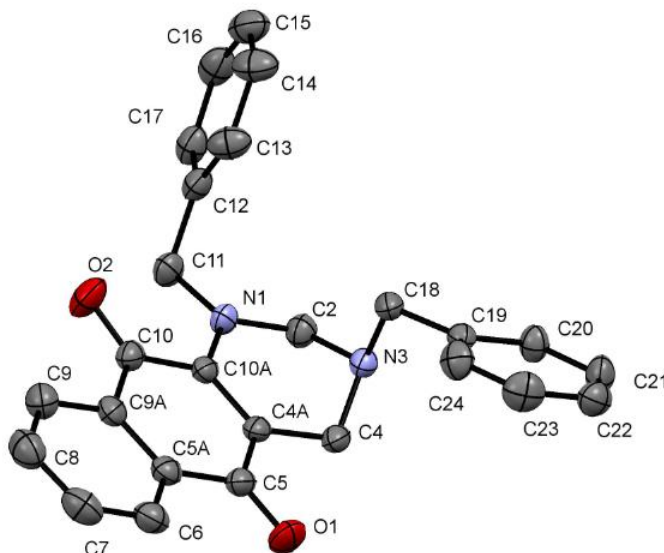

**Table S2.** X-Ray crystallographic data for compound **23**.

|                                               |                                                            |
|-----------------------------------------------|------------------------------------------------------------|
| Empirical formula                             | $C_{26}H_{22}N_2O_2$                                       |
| Formula weight                                | 394.45                                                     |
| Temperature/K                                 | 293(2)                                                     |
| Crystal system                                | Monoclinic                                                 |
| Space group                                   | $P2_1/c$                                                   |
| $a/\text{\AA}$                                | 16.0640(9)                                                 |
| $b/\text{\AA}$                                | 5.5113(3)                                                  |
| $c/\text{\AA}$                                | 22.5128(12)                                                |
| $\alpha/^\circ$                               | 90                                                         |
| $\beta/^\circ$                                | 93.298(2)                                                  |
| $\gamma/^\circ$                               | 90                                                         |
| Volume/ $\text{\AA}^3$                        | 1989.84(19)                                                |
| Z                                             | 4                                                          |
| $\rho_{\text{calc}}/\text{g/cm}^3$            | 1.317                                                      |
| $\mu/\text{mm}^{-1}$                          | 0.084                                                      |
| F(000)                                        | 832.0                                                      |
| Crystal size/ $\text{mm}^3$                   | $0.45 \times 0.27 \times 0.11$                             |
| Radiation                                     | MoK $\alpha$ ( $\lambda = 0.71073$ )                       |
| $2\theta$ range for data collection/ $^\circ$ | 4.304 to 50.7                                              |
| Index ranges                                  | $-19 \leq h \leq 19, -6 \leq k \leq 6, -27 \leq l \leq 27$ |
| Reflections collected                         | 55863                                                      |

|                                                |                                                                  |
|------------------------------------------------|------------------------------------------------------------------|
| Independent reflections                        | 3647 [ $R_{\text{int}} = 0.0624$ , $R_{\text{sigma}} = 0.0209$ ] |
| Data/restraints/parameters                     | 3647/0/271                                                       |
| Goodness-of-fit on $F^2$                       | 1.100                                                            |
| Final R indexes [ $I \geq 2\sigma(I)$ ]        | $R_1 = 0.0429$ , $wR_2 = 0.1065$                                 |
| Final R indexes [all data]                     | $R_1 = 0.0624$ , $wR_2 = 0.1200$                                 |
| Largest diff. peak/hole / $e \text{ \AA}^{-3}$ | 0.20/-0.15                                                       |

1,3-Di-(4-chlorobenzyl)-1,2,3,4-tetrahydrobenzo[g]quinazoline-5,10-dione (24) was isolated as oil in 75 % yield (995 mg). IR  $\nu_{\text{max}}$  ( $\text{cm}^{-1}$ , filme): 2921, 2847, 1667, 1618, 1592, 1551, 1487, 1381, 1349, 1289, 1268, 1250, 1088, 1011, 950, 921, 838, 799, 721, 686.  $^1\text{H}$ NMR (500 MHz,  $\text{CDCl}_3$ )  $\delta$  (ppm): 3.61 (2H, s), 3.81 (2H, s), 3.84 (2H, s), 4.73 (2H, s), 7.38 (2H, d,  $J$  8.6 Hz), 7.22(2H, d,  $J$  8.6 Hz), 7.26 (2H, d,  $J$  8.6 Hz), 7.29 (2H, d,  $J$  8.6 Hz), 7.62 (1H, dt,  $J$  1.4 and 7.5 Hz), 7.68 (1H, dt,  $J$  1.4 and 7.5 Hz), 7.98 (dd, 1H,  $J$  1.4 and 7.5 Hz), 8.04 (1H, dd,  $J$  1.4 and 7.5 Hz).  $^{13}\text{C}$  NMR (APT, 125 MHz,  $\text{CDCl}_3$ )  $\delta$  (ppm): 48.8, 54.1, 56.9, 68.6, 116.8, 125.4, 126.3, 128.6, 128.7, 129.1, 130.1, 132.0, 132.3, 133.2, 133.4, 133.9, 135.8, 136.1, 146.7, 181.4, 182.0. HRESIMS  $m/z$ :  $(\text{M}+\text{H})^+$  463.1484 (Calculated for  $\text{C}_{26}\text{H}_{20}\text{Cl}_2\text{N}_2\text{O}_2$ : 463.0980).

1,3-Di-(2,4-dichlorobenzyl)-1,2,3,4-tetrahydrobenzo[g]quinazoline-5,10-dione (25) was isolated as an oil in 80% yield. IR  $\nu_{\text{max}}$  ( $\text{cm}^{-1}$ , film): 2948, 2821, 1677, 1587, 1471, 1384, 1337, 1257, 1202, 1163, 1138, 1098, 1045, 1014, 982, 946, 856, 824, 763, 732, 696, 659.  $^1\text{H}$  NMR (500 MHz,  $\text{CDCl}_3$ )  $\delta$  (ppm): 3.77 (2H, s), 3.83 (2H, s), 3.97 (2H, s), 4.89 (2H, s), 7.20-7.24 (2H, m), 7.33-7.39 (4H, m), 7.61 (1H, dt, 1H,  $J$  1.1 and 7.6 Hz), 7.69(1H, dt, 1H,  $J$  1.1 and 7.6 Hz), 7.95 (dd, 1H,  $J$  1.1 and 7.6 Hz), 8.04 (1H, dd, 1H,  $J$  1.1 and 7.6 Hz).  $^{13}\text{C}$  NMR (APT, 125.0 MHz,  $\text{CDCl}_3$ )  $\delta$  (ppm): 48.3, 52.0, 54.1, 69.9, 116.5, 125.4, 126.3, 127.0, 127.3, 129.2, 129.2, 129.3, 129.6, 130.9, 131.7, 132.2, 132.2, 133.3, 133.5, 133.6, 133.7, 133.8, 133.9, 134.6, 146.6, 181.3, 181.7. HRESIMS  $m/z$ :  $(\text{M}+\text{CH}_3\text{OH}_2)^+$  561.9746 (Calculated for  $\text{C}_{27}\text{H}_{22}\text{Cl}_4\text{N}_2\text{O}_3$ : 562.0385).

## References

1. Barluenga, M.; Bayon, A. M.; Campos, P.; Asensio, G.; Gonzalez-Nuñez, E.; Molina, Y. *J. Chem. Soc. Perkin Trans. 1* **1988**, 1631-1636.  
[doi:10.1039/P19880001631](https://doi.org/10.1039/P19880001631)



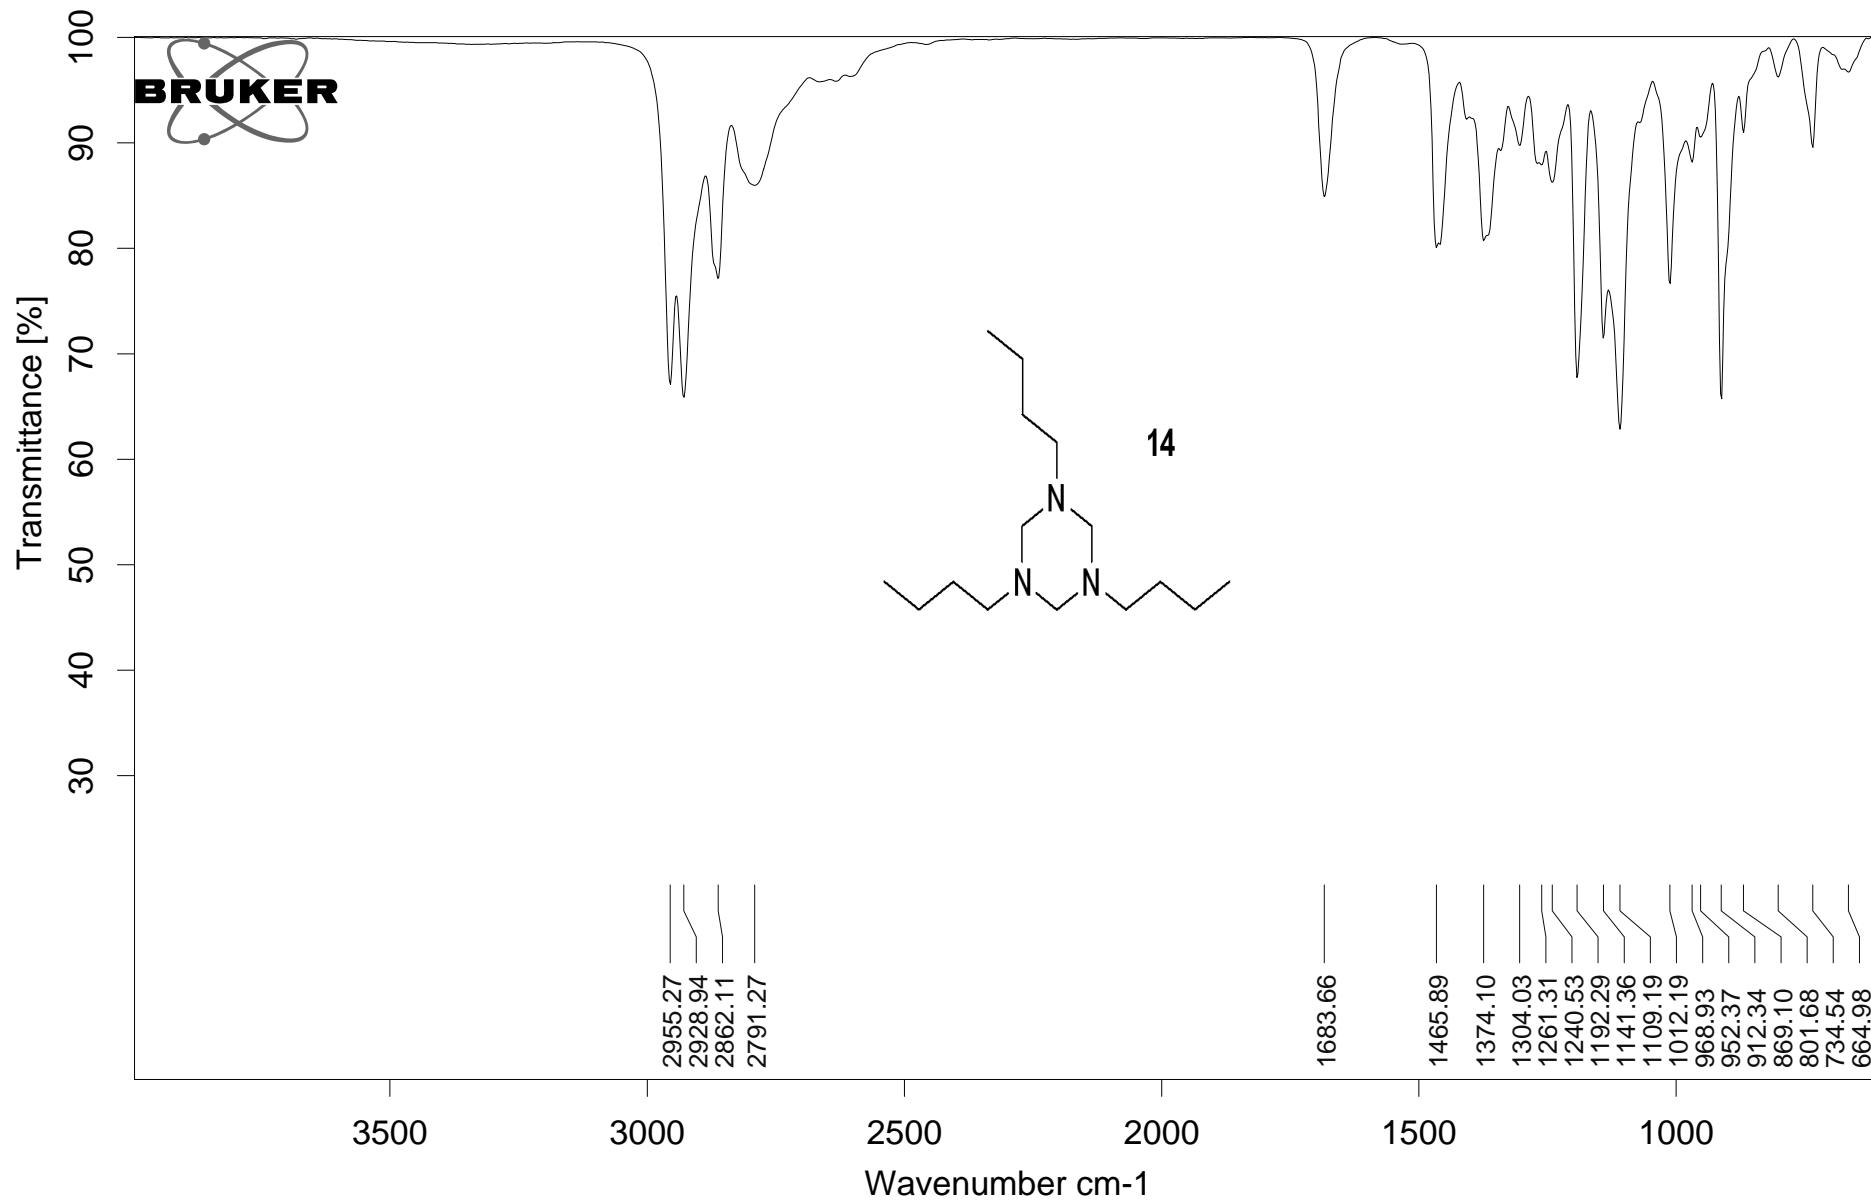

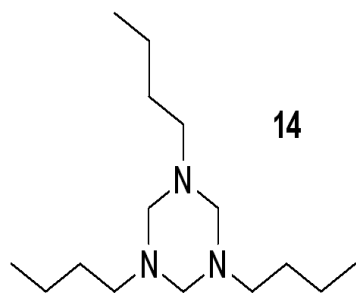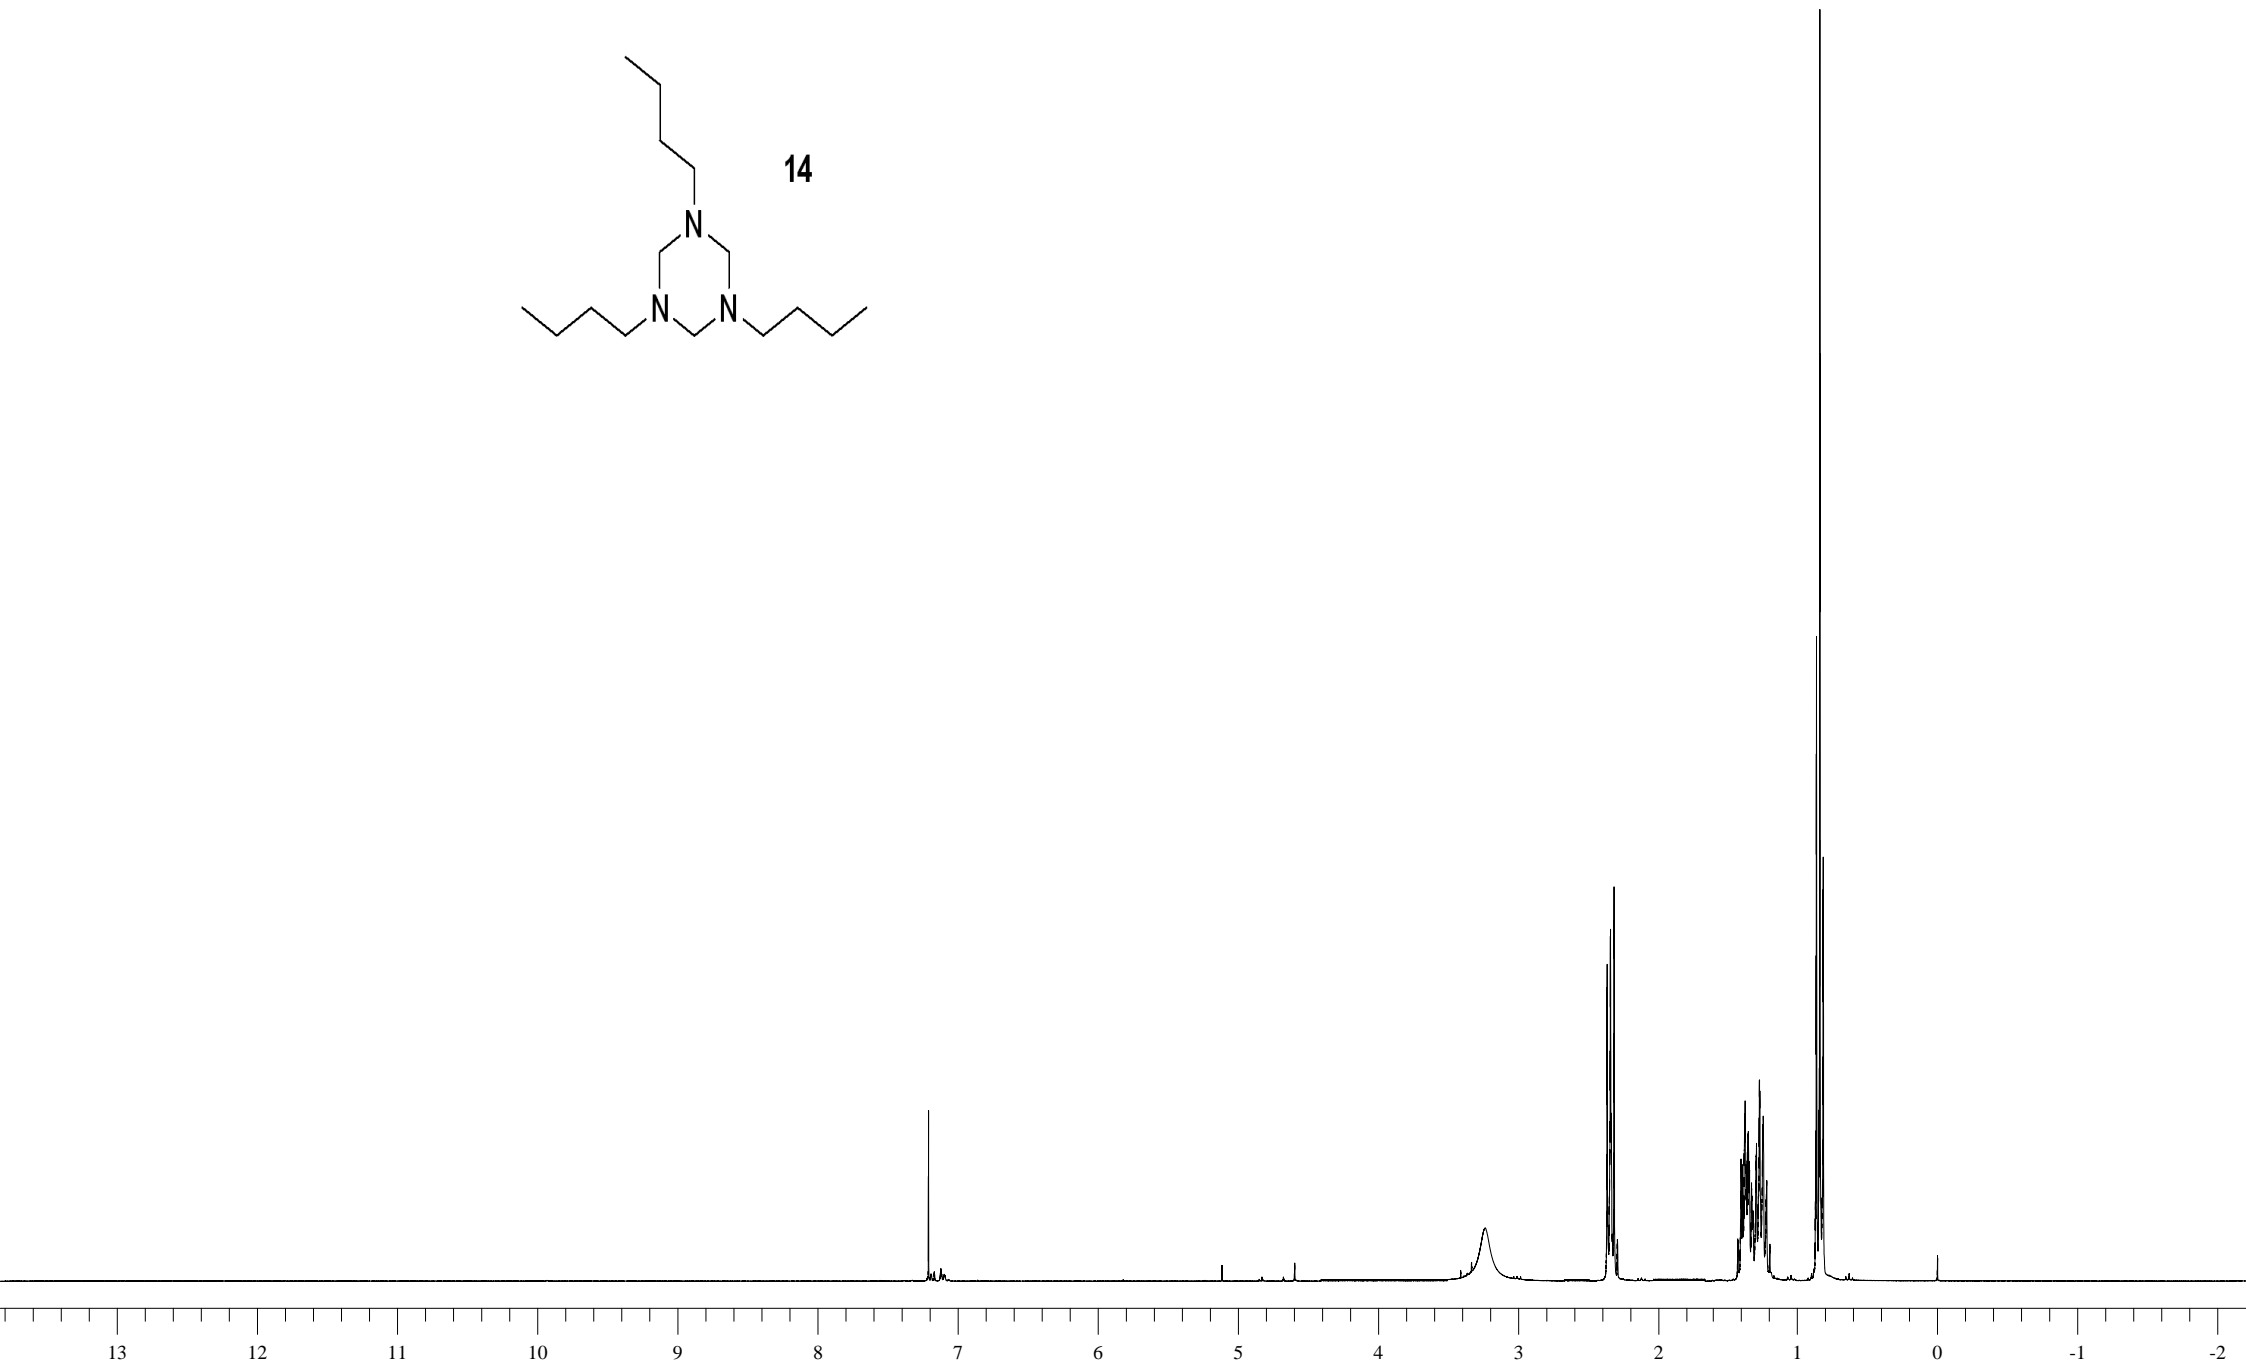

1.426  
1.422  
1.402  
1.392  
1.386  
1.376  
1.373  
1.369  
1.365  
1.357  
1.350  
1.344  
1.342  
1.327  
1.324  
1.317  
1.292  
1.271  
1.268  
1.253  
1.248  
1.244  
1.223  
1.219  
1.196

0.864  
0.840  
0.816

S11

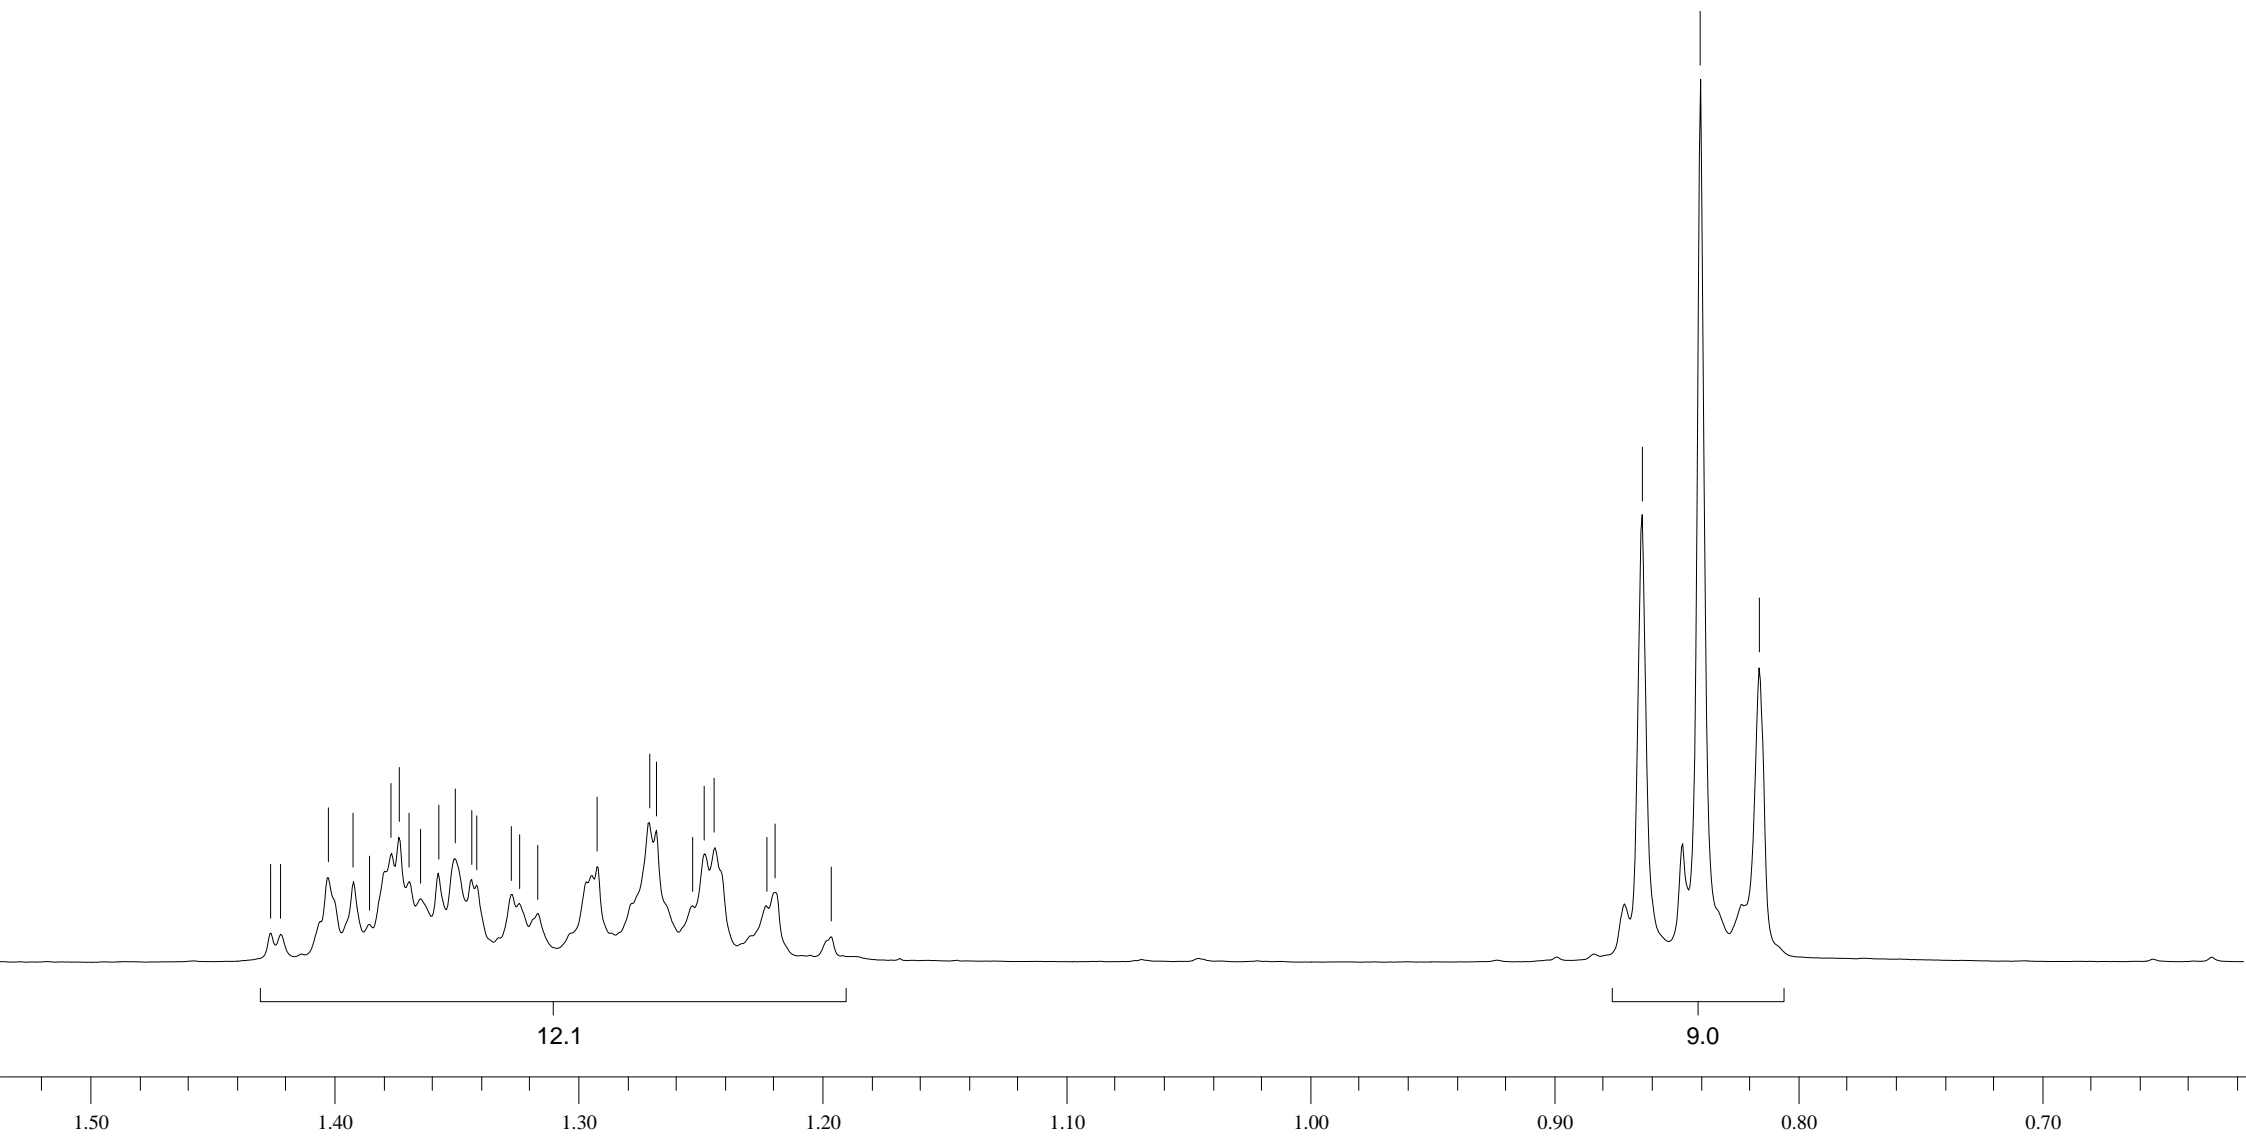

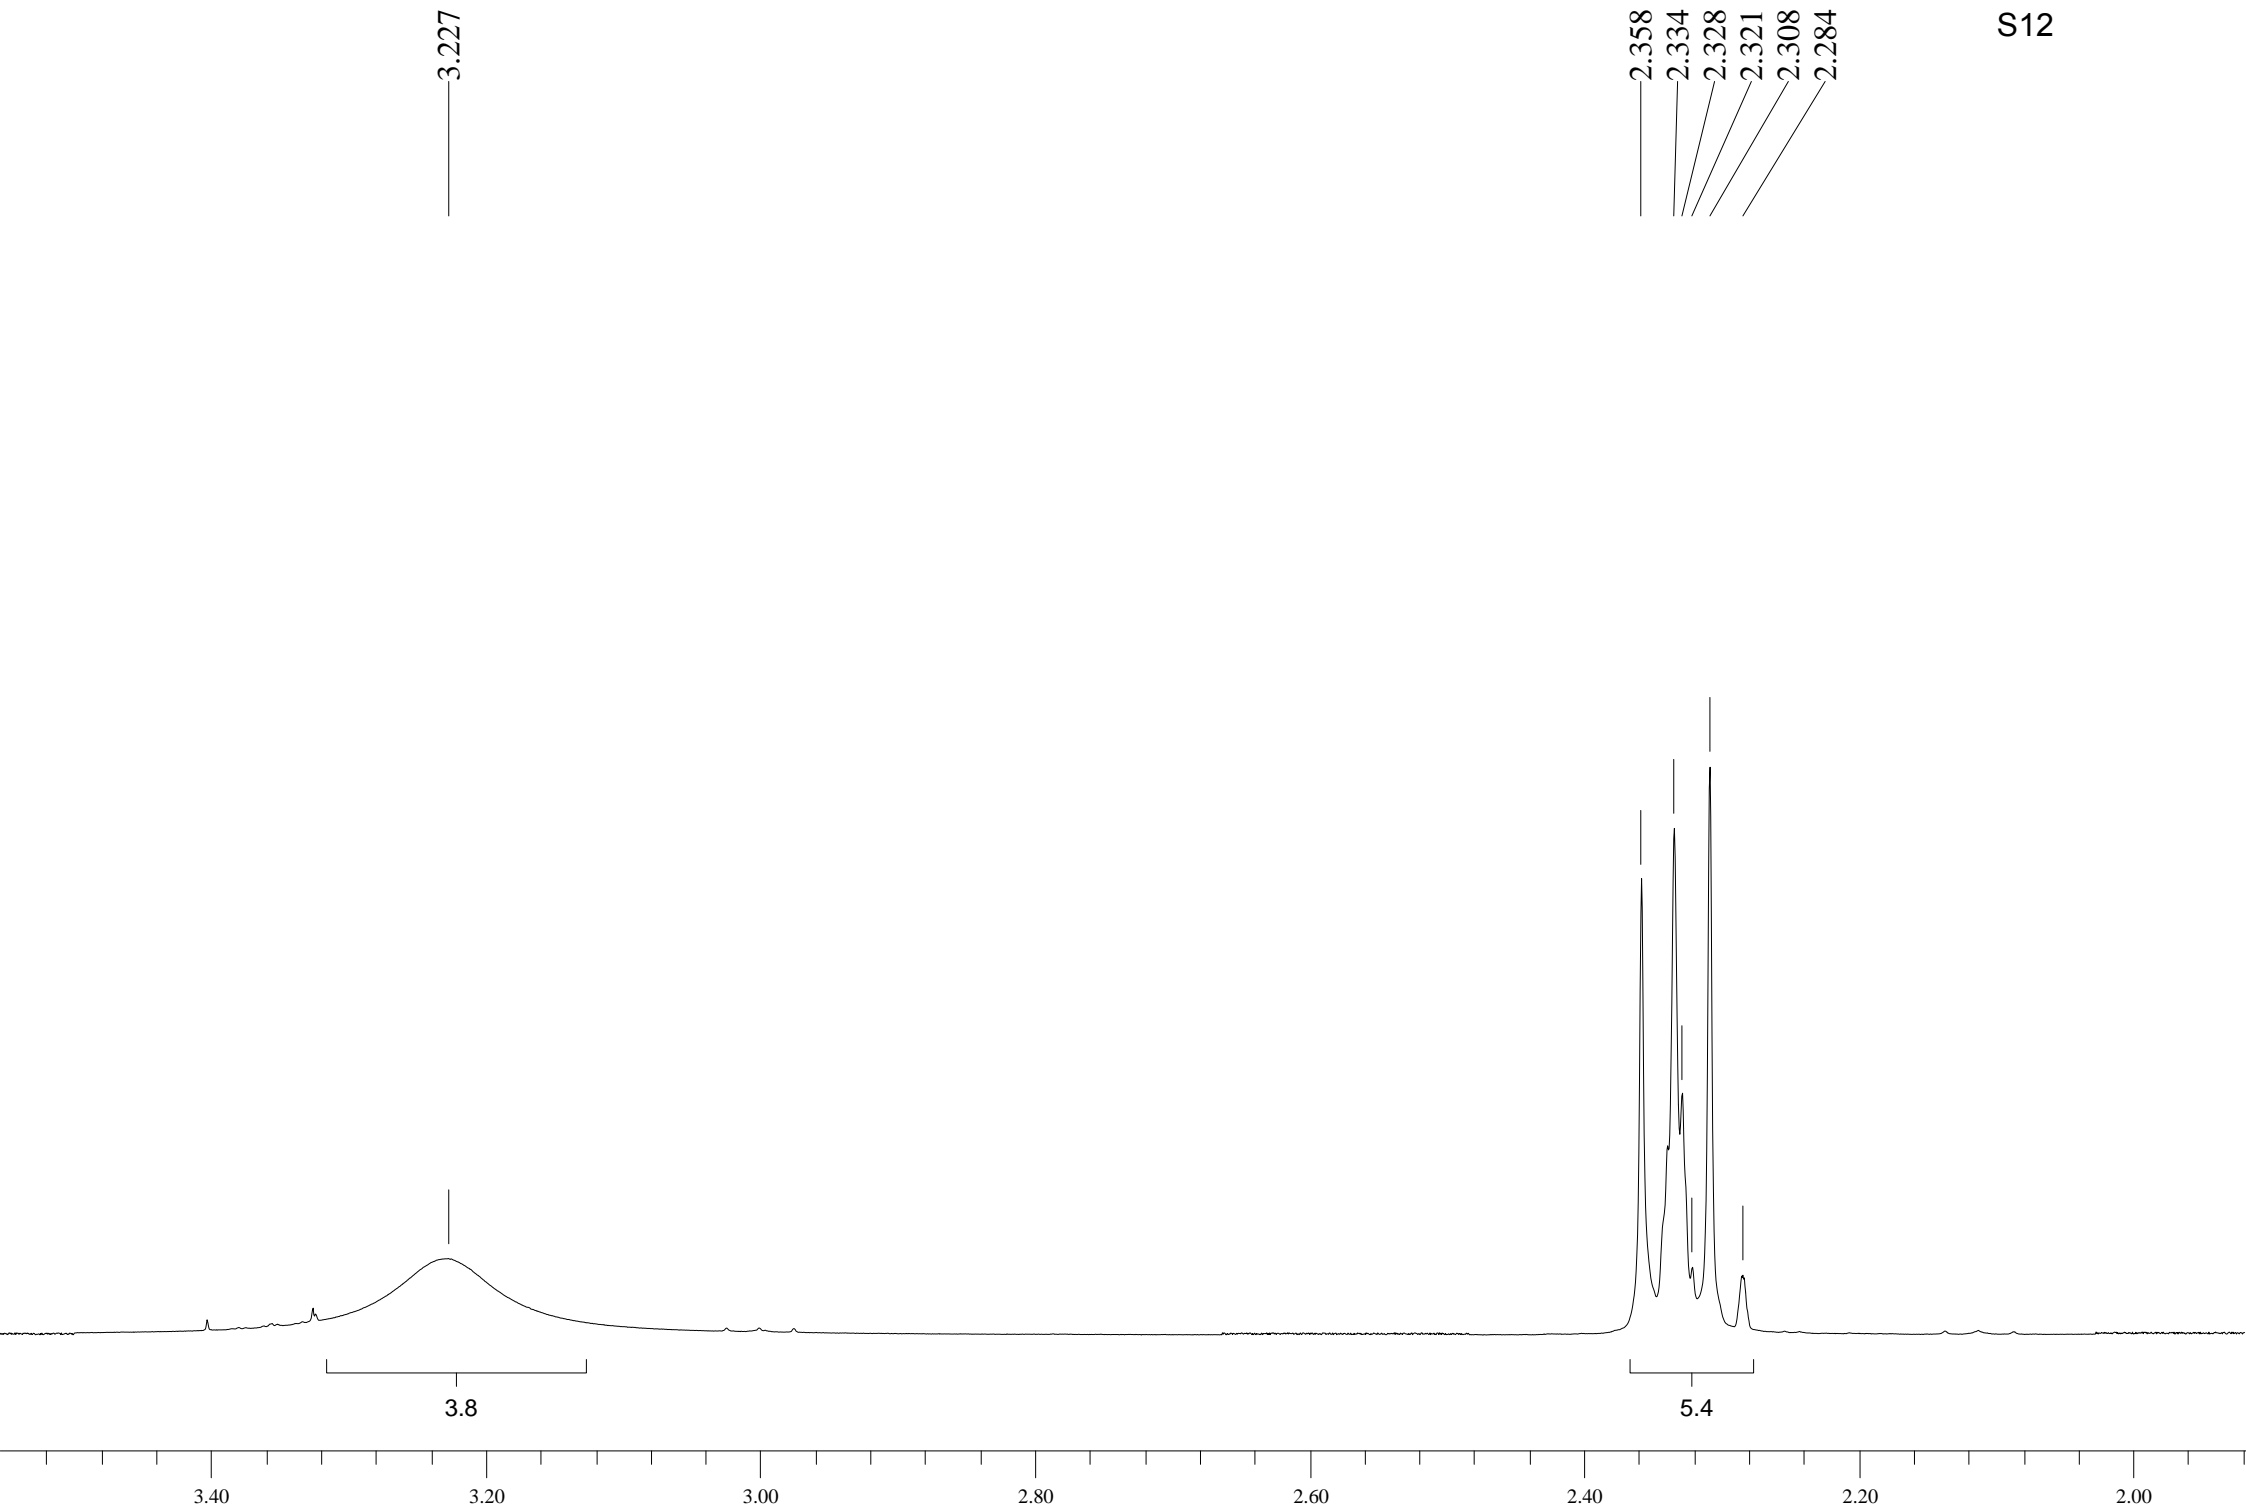

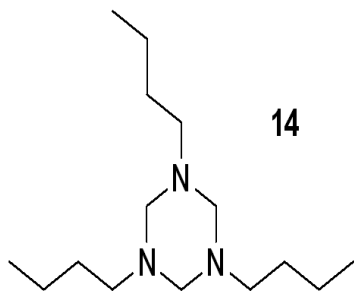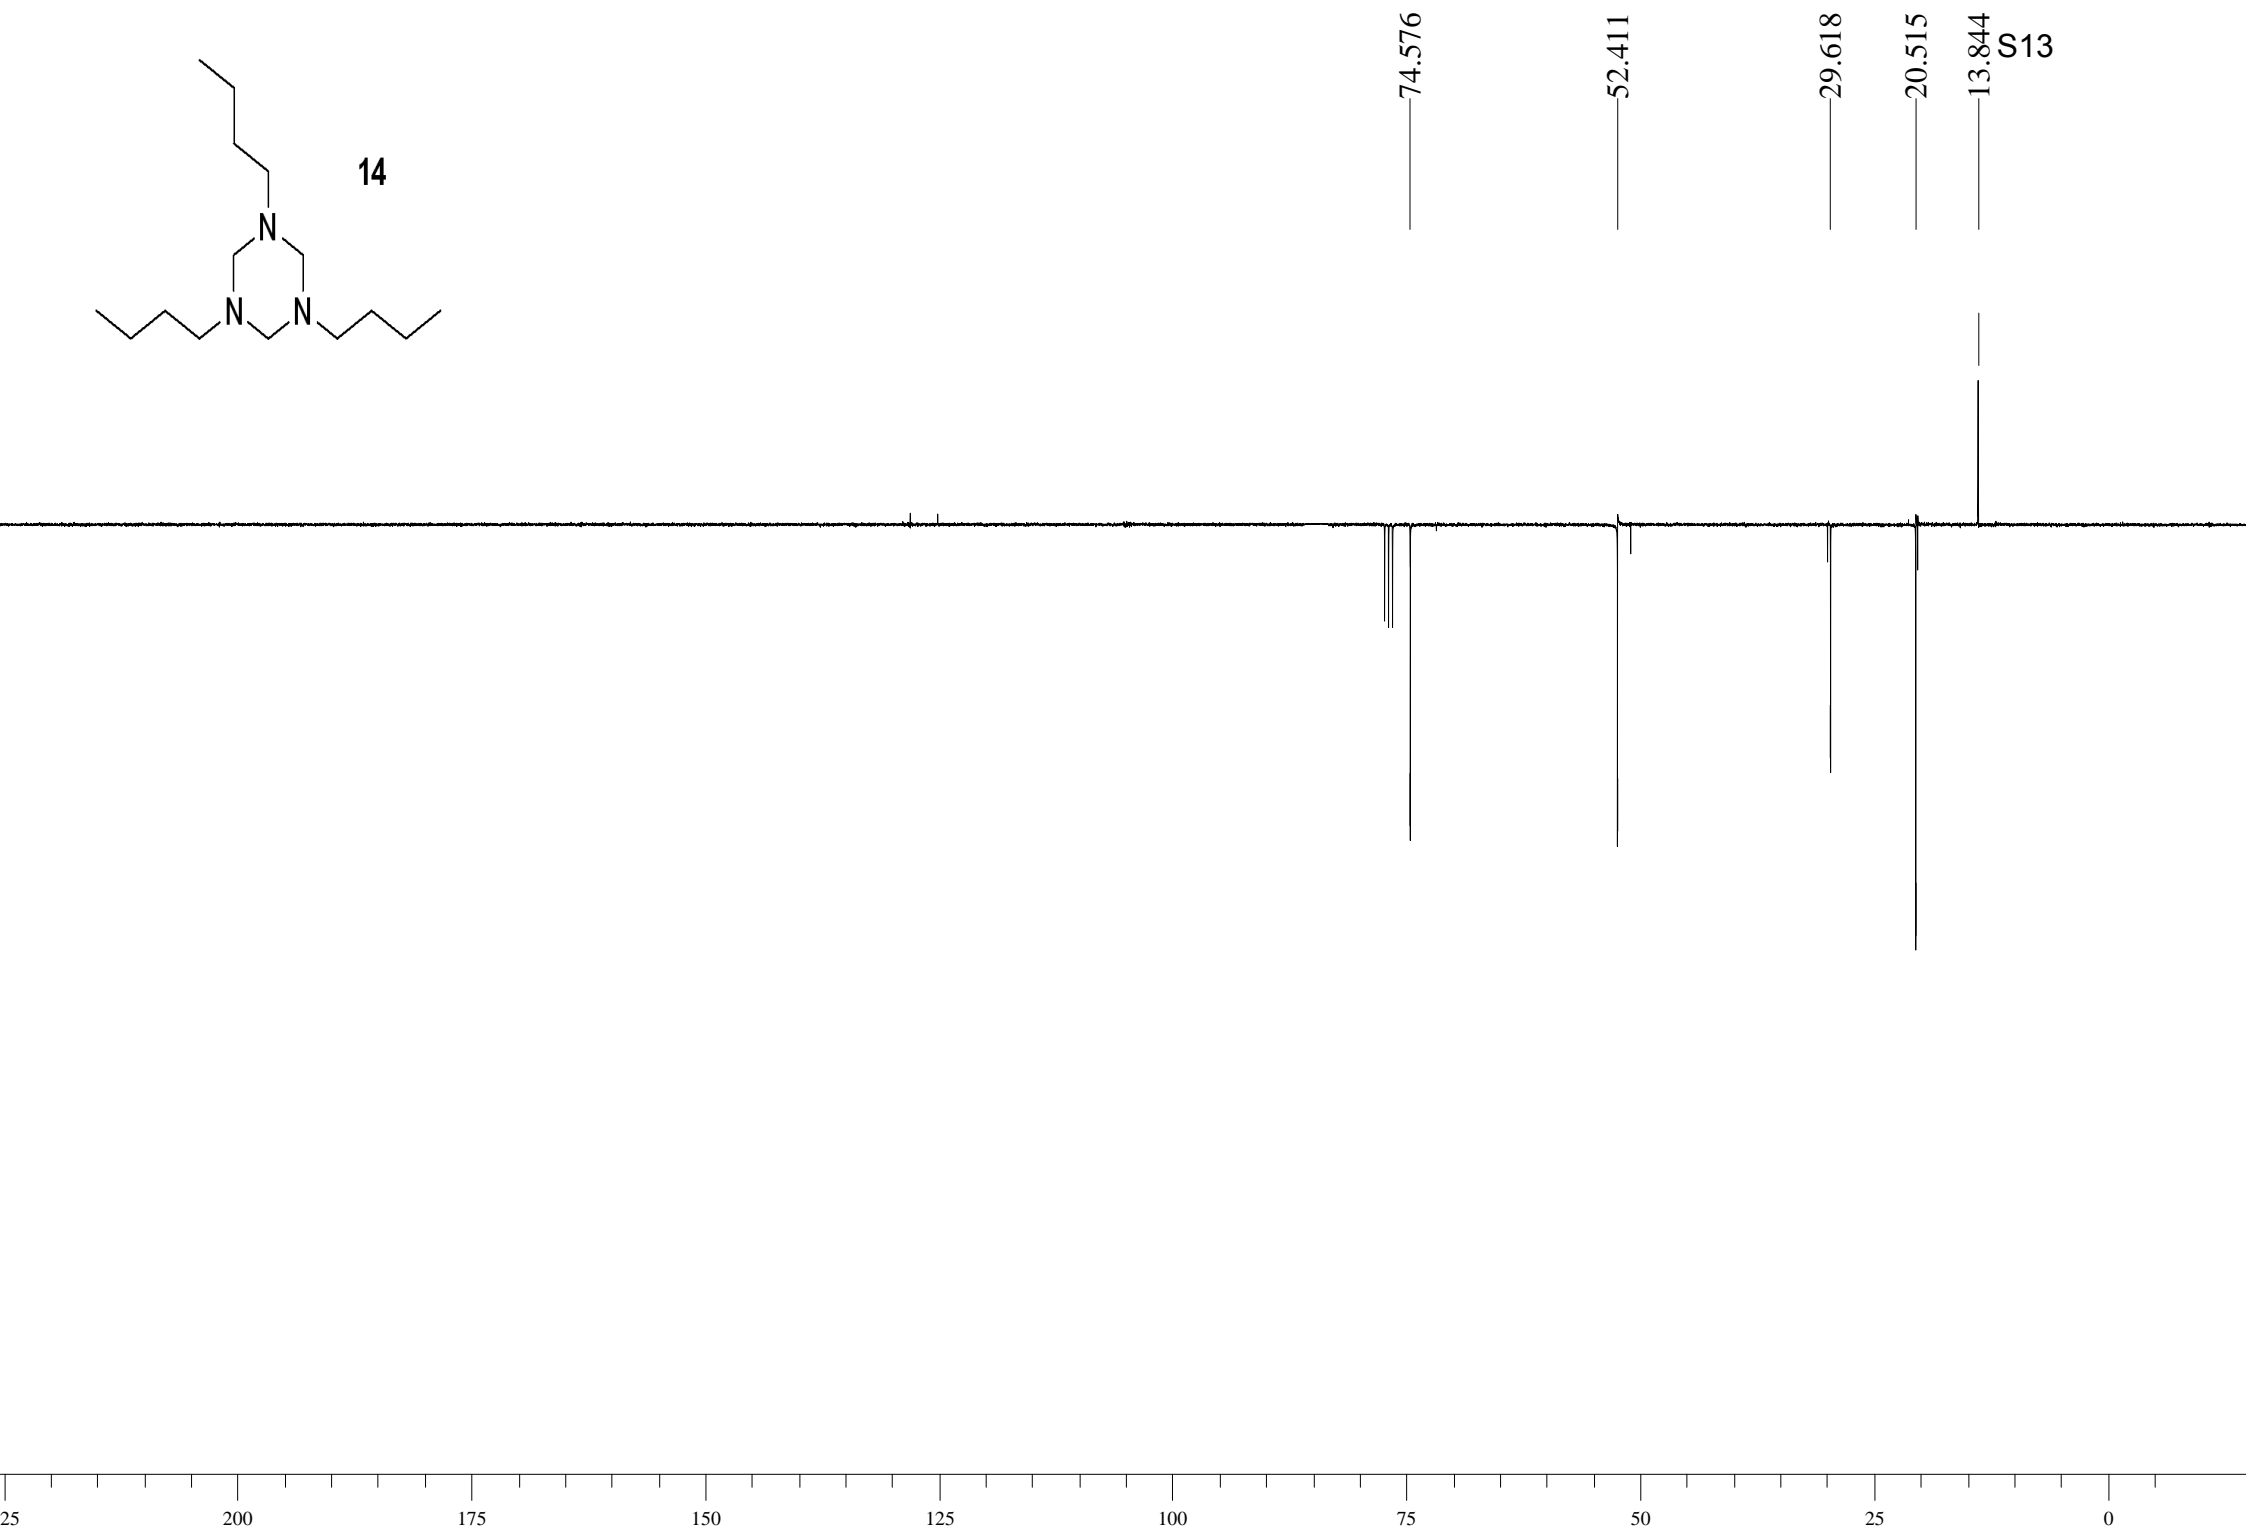

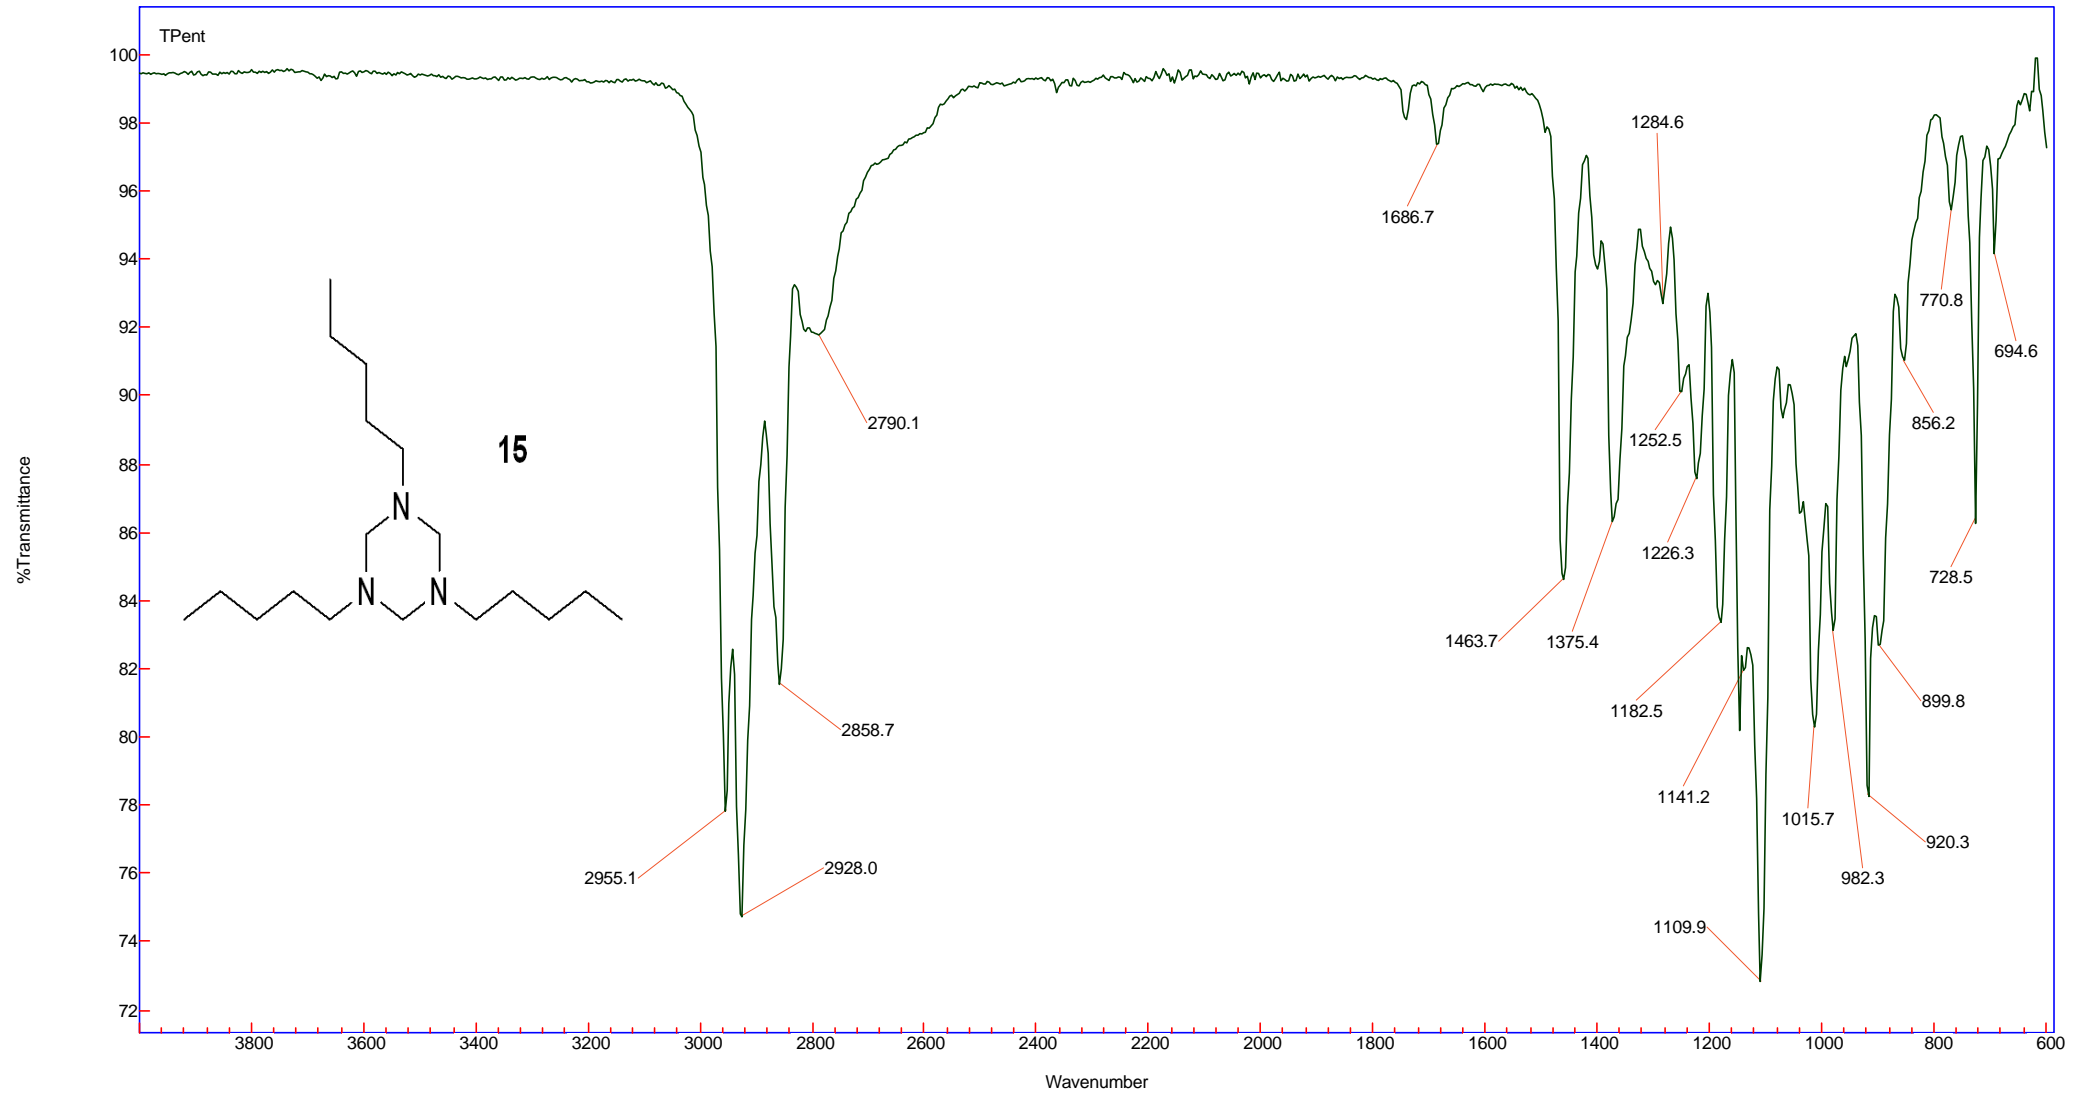

|       |   |
|-------|---|
| Name  |   |
| TPent | — |

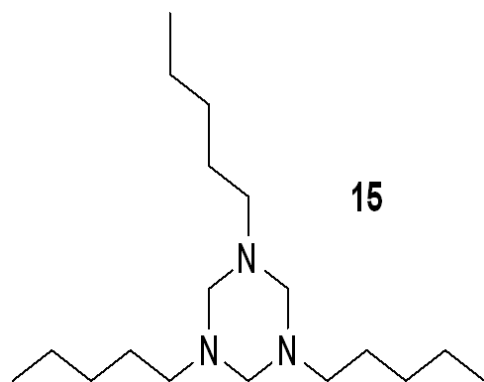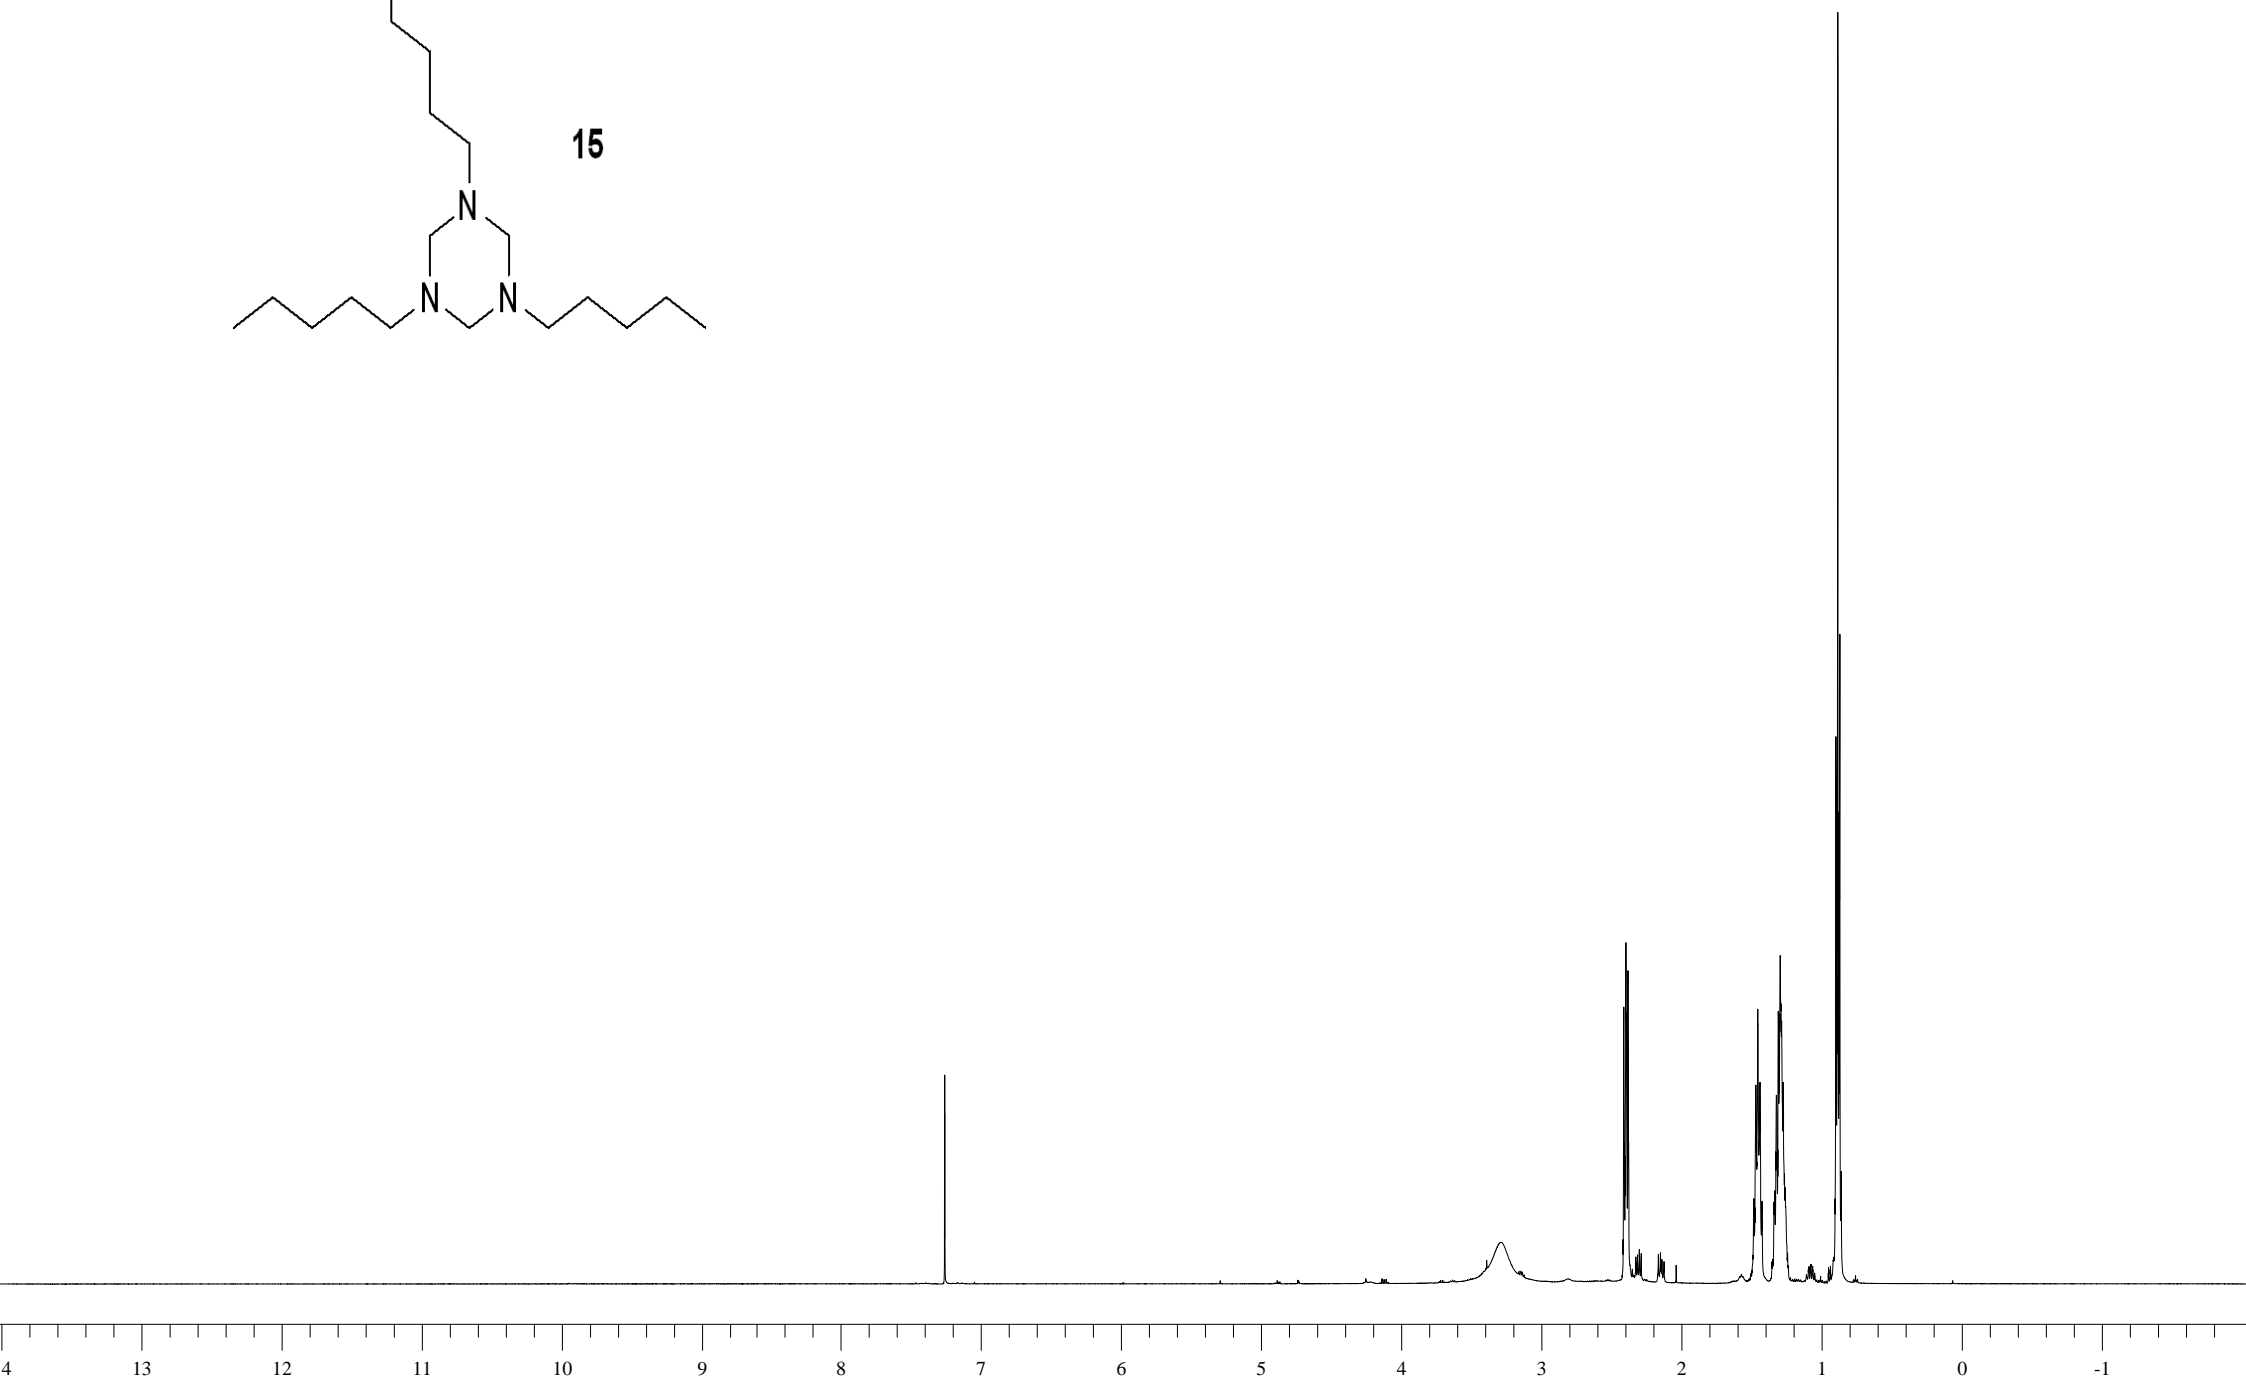

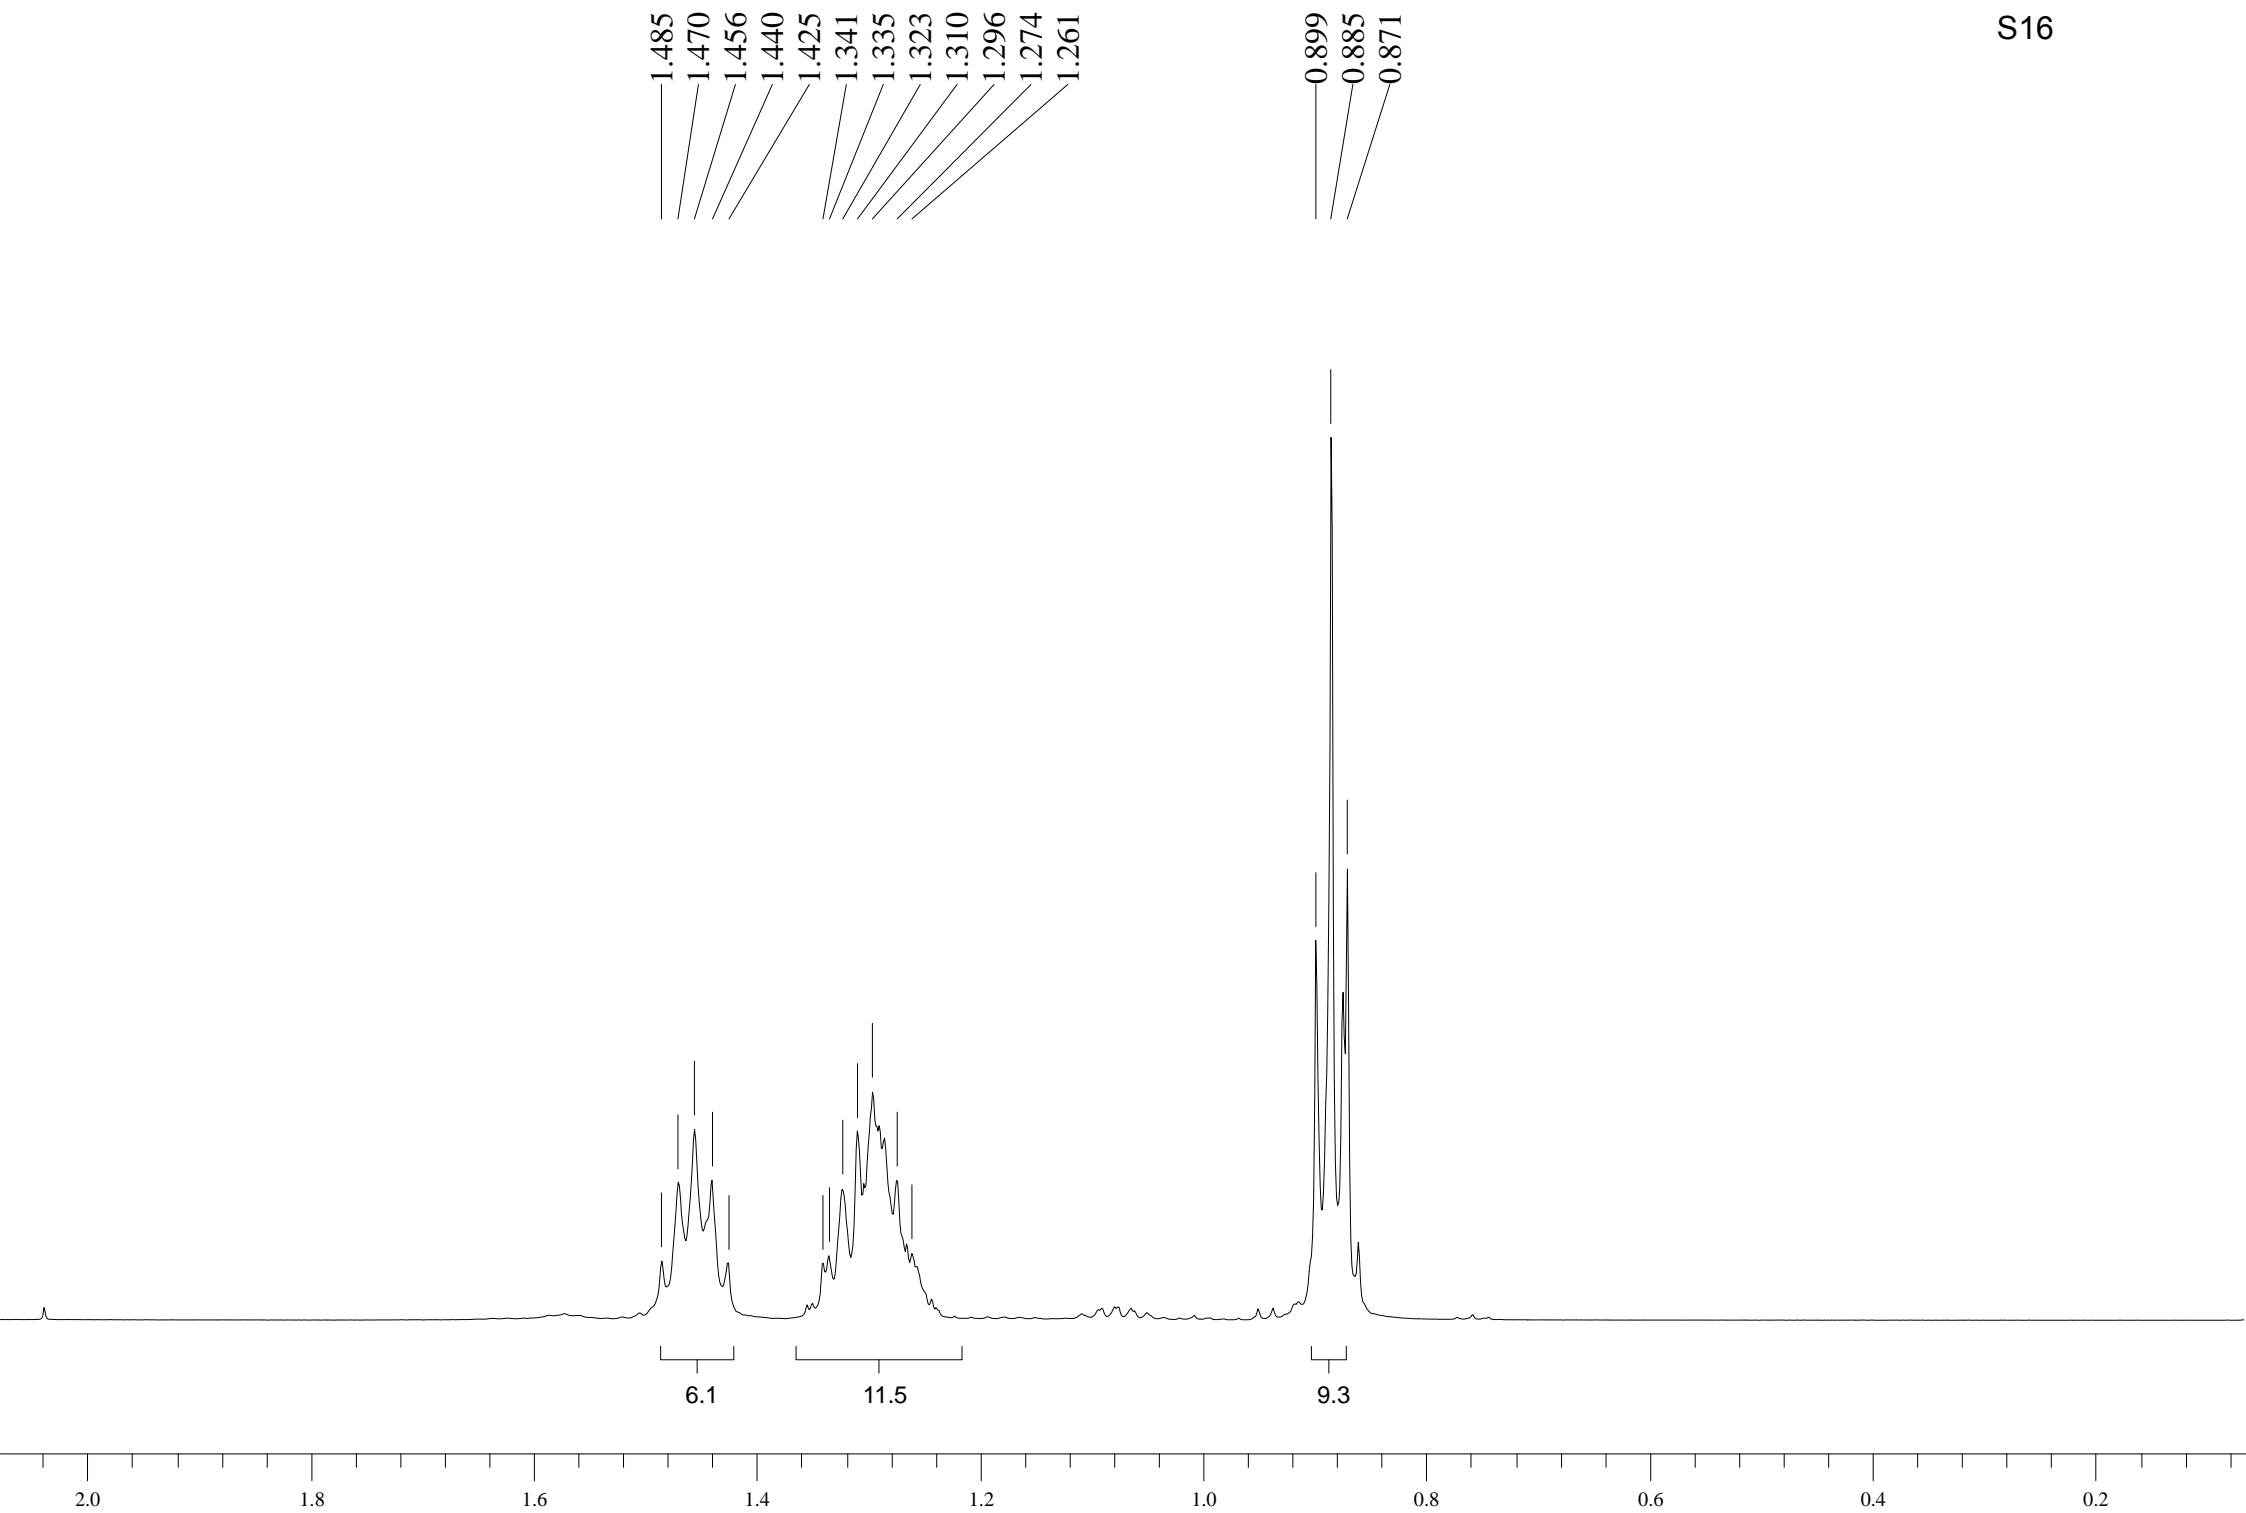



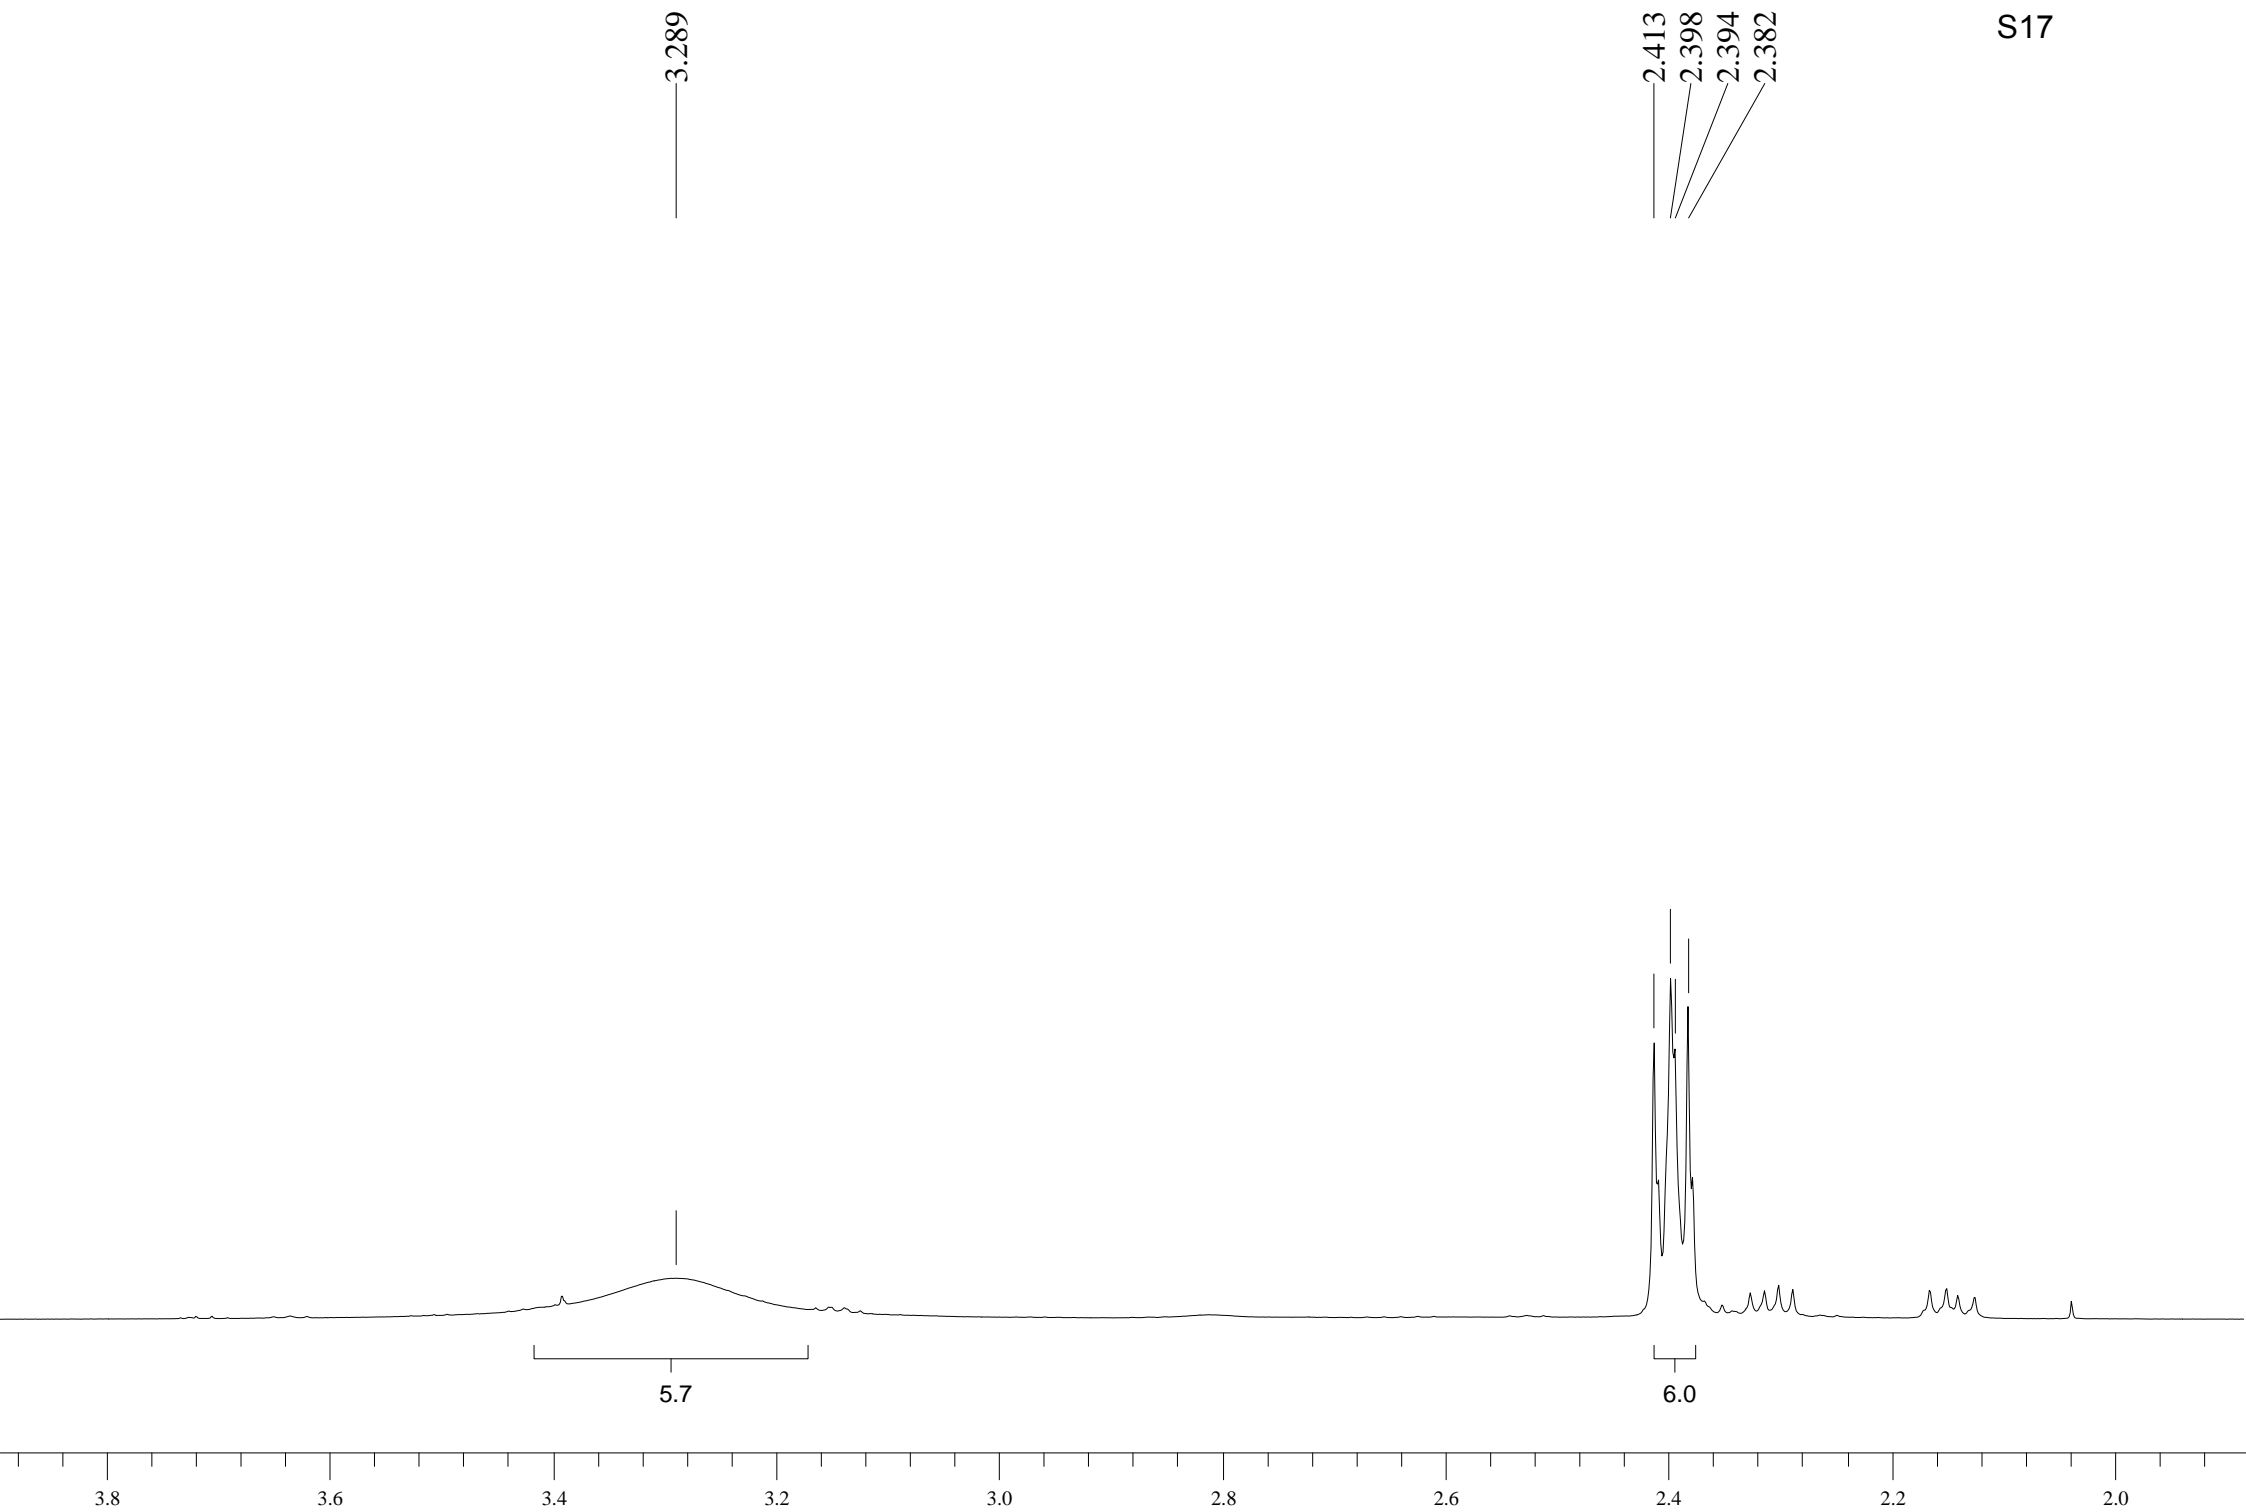

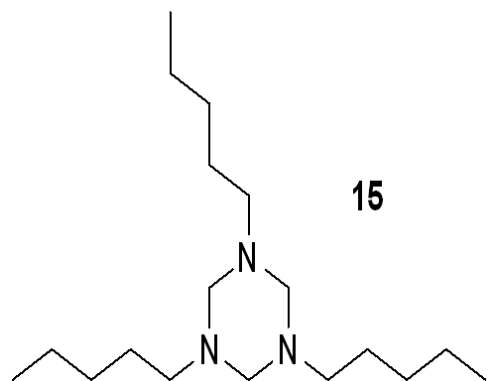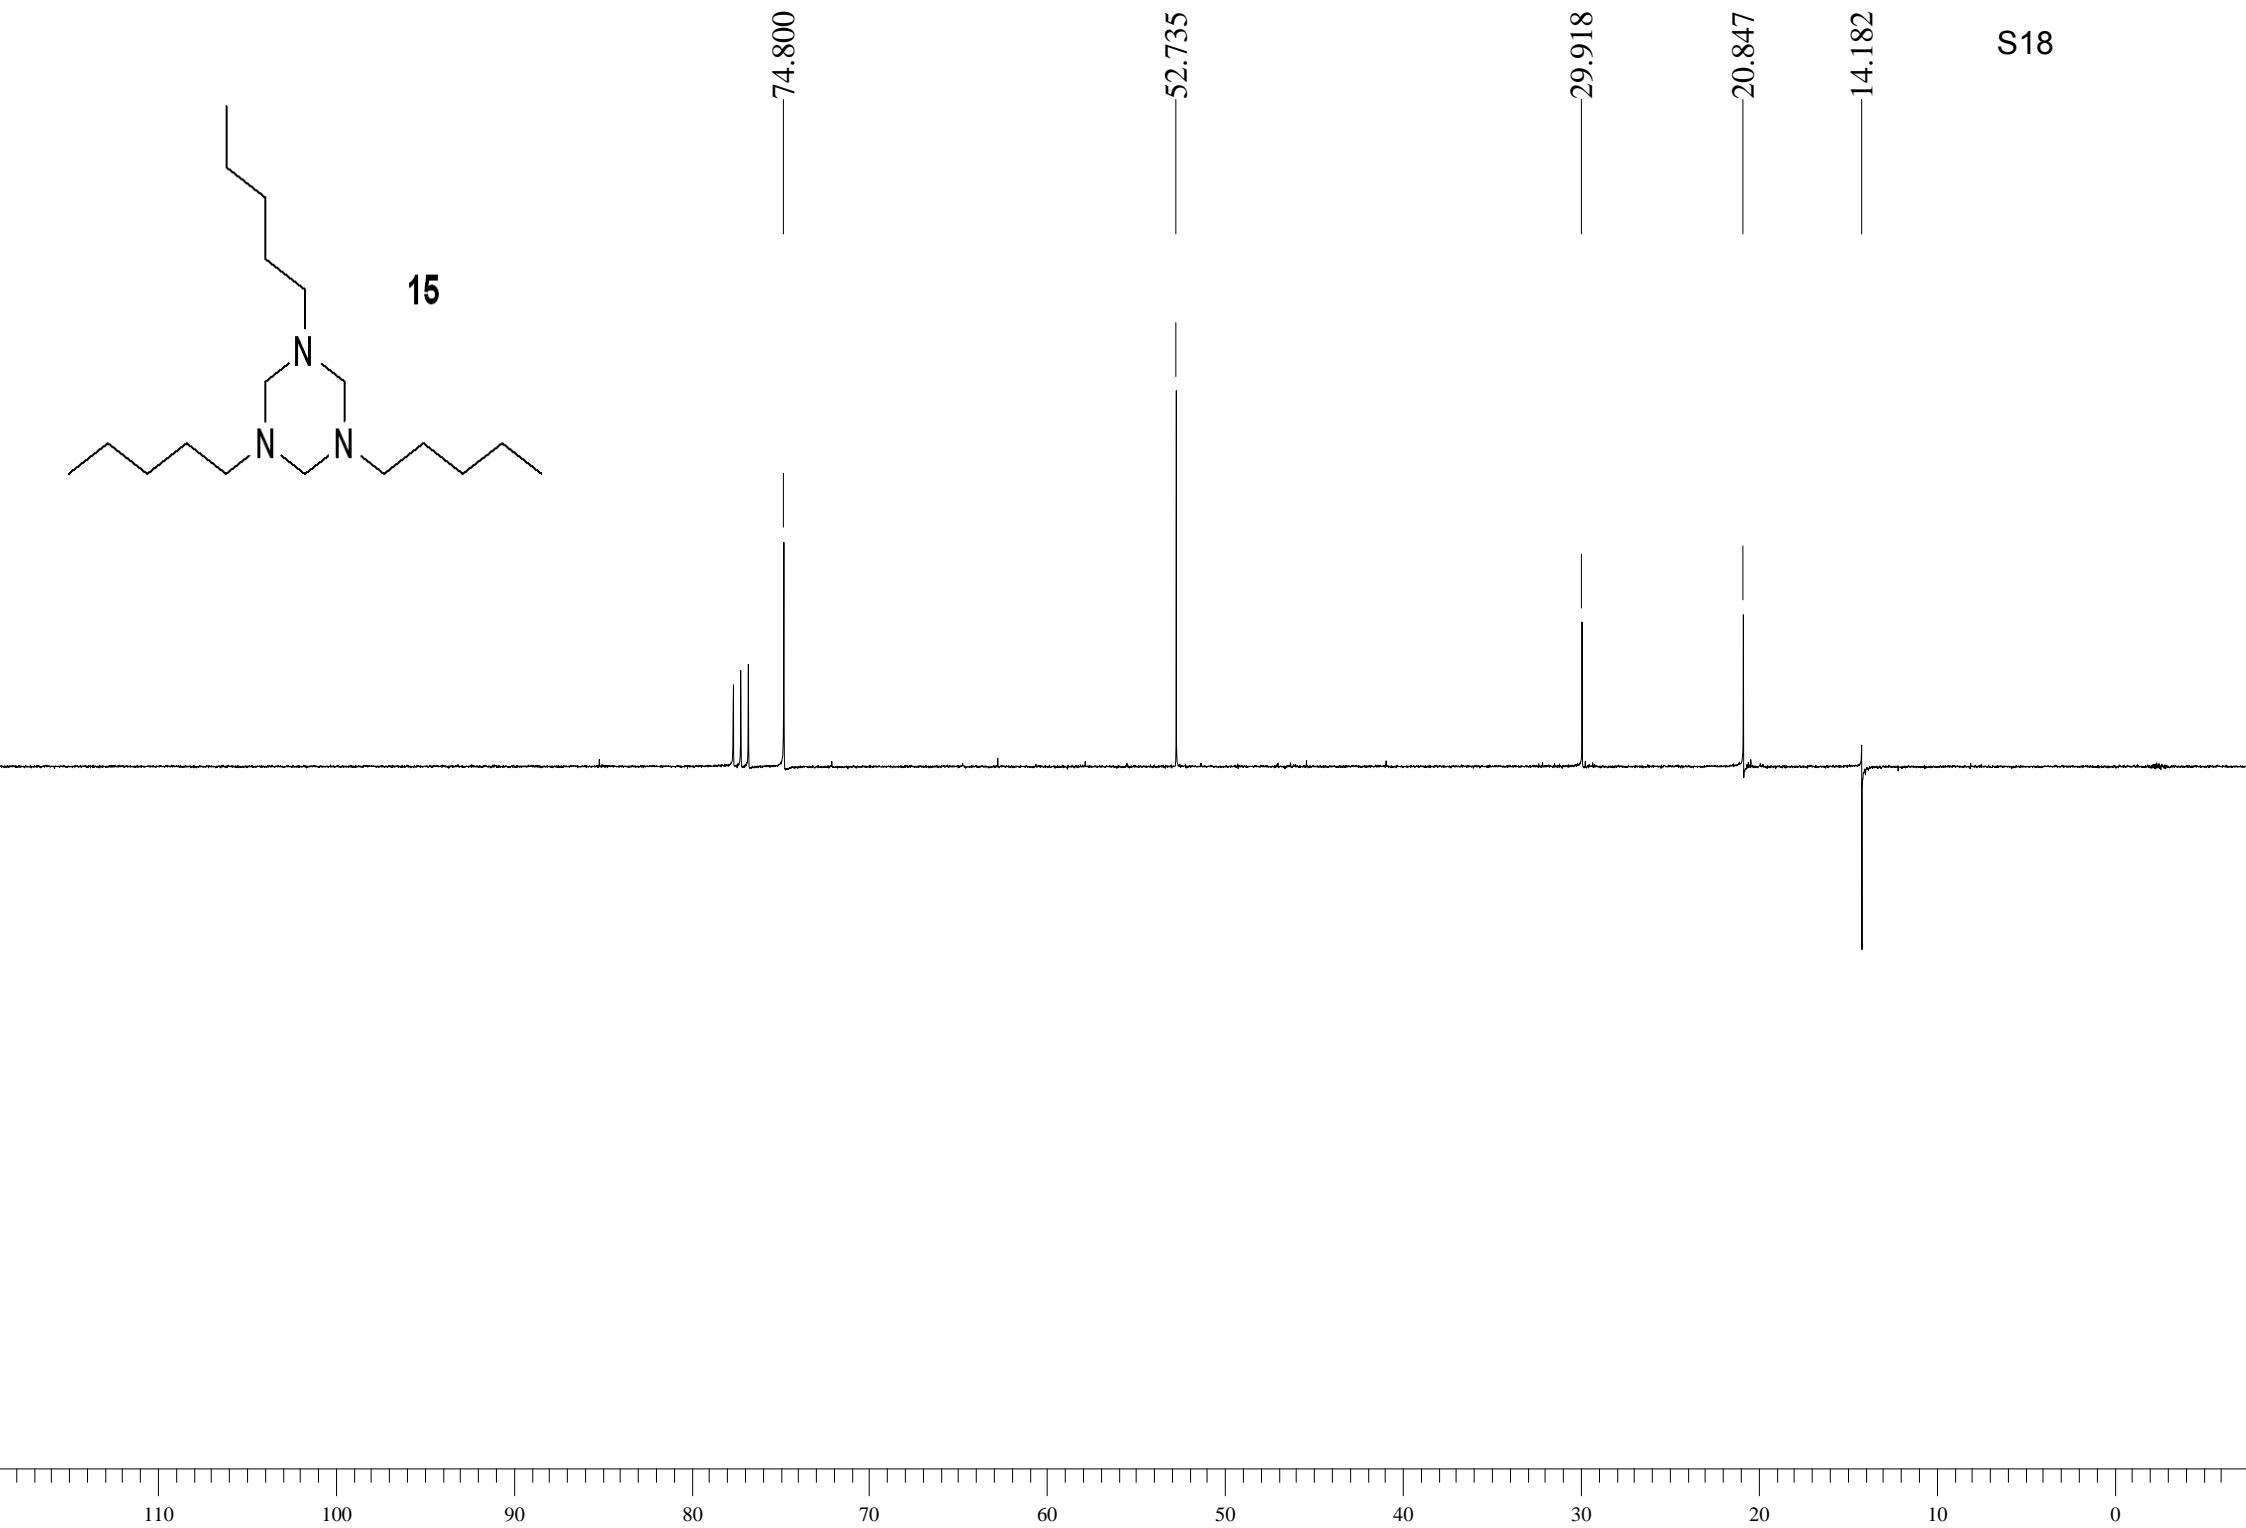

S18

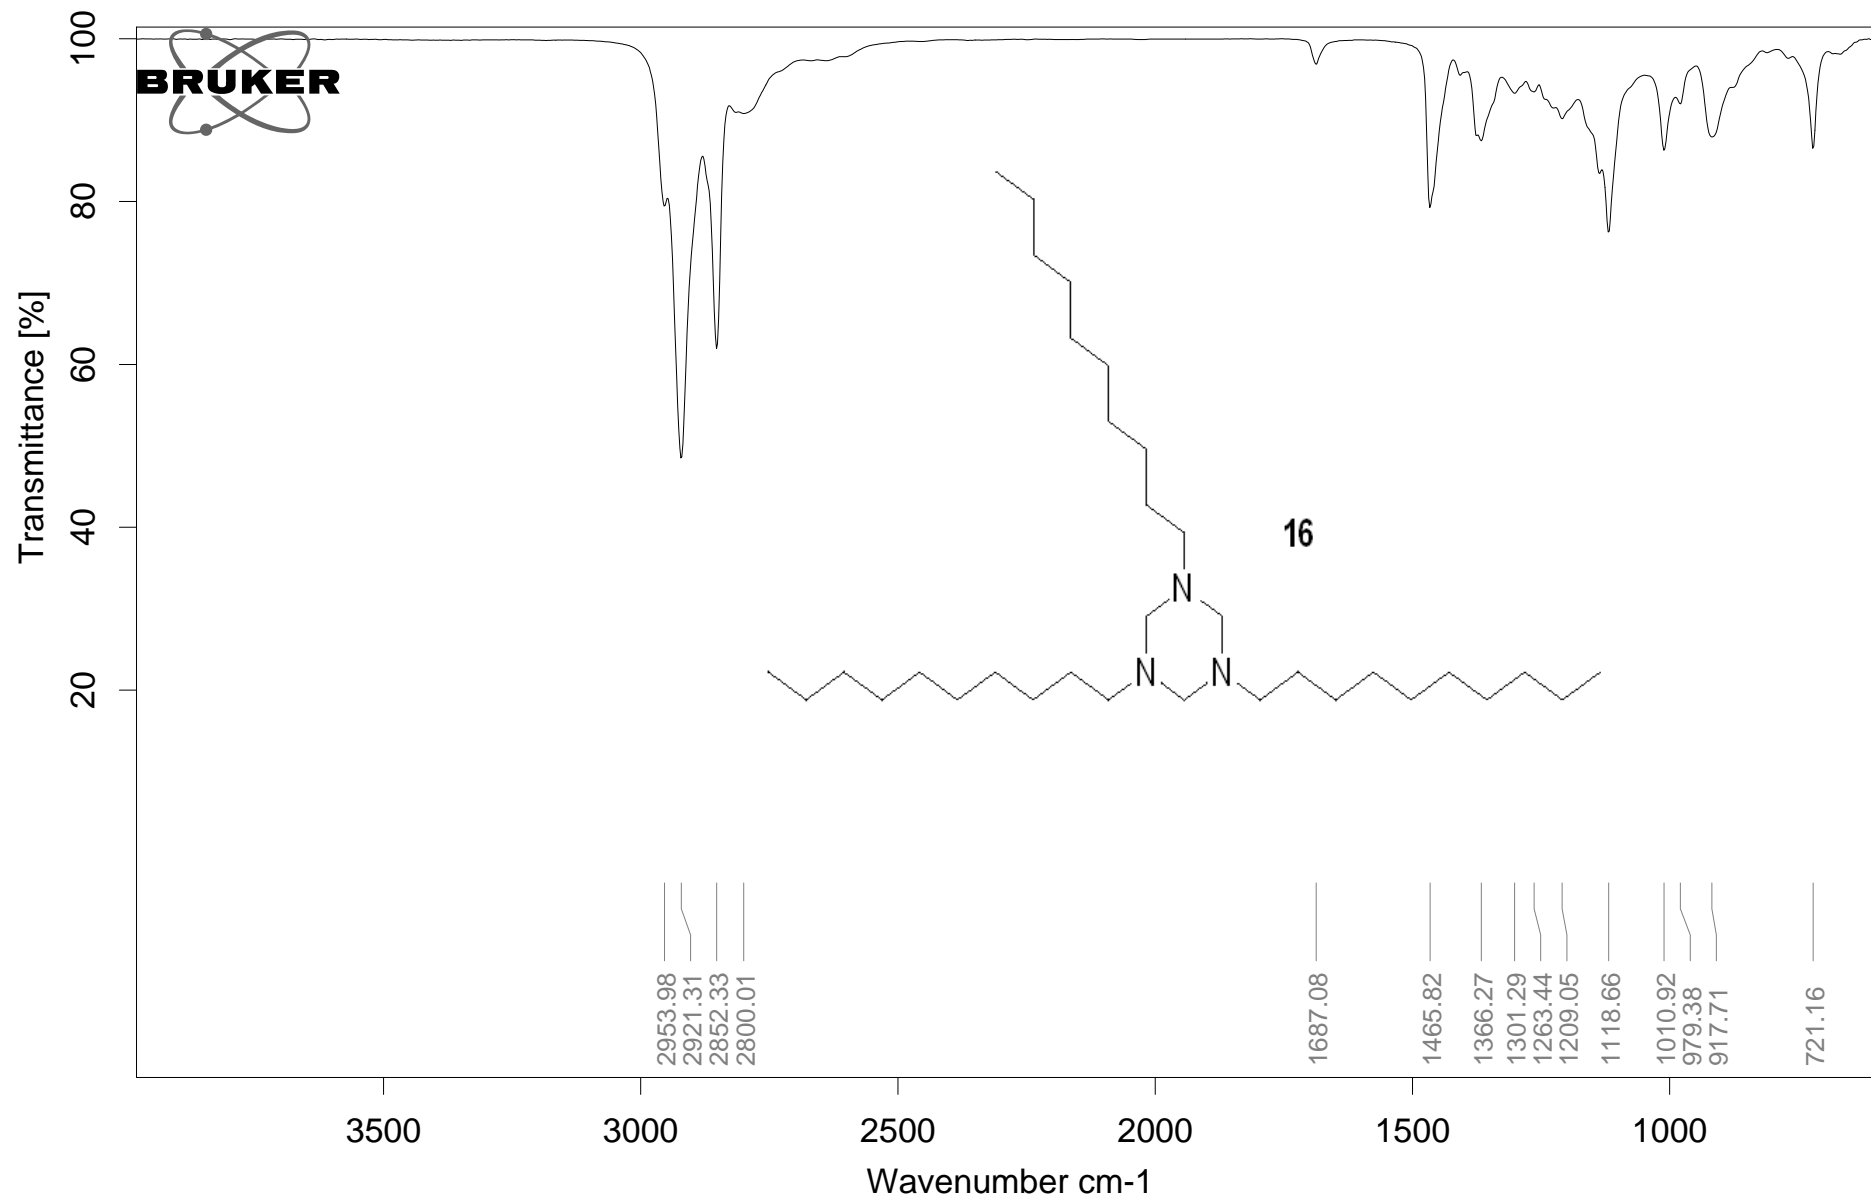

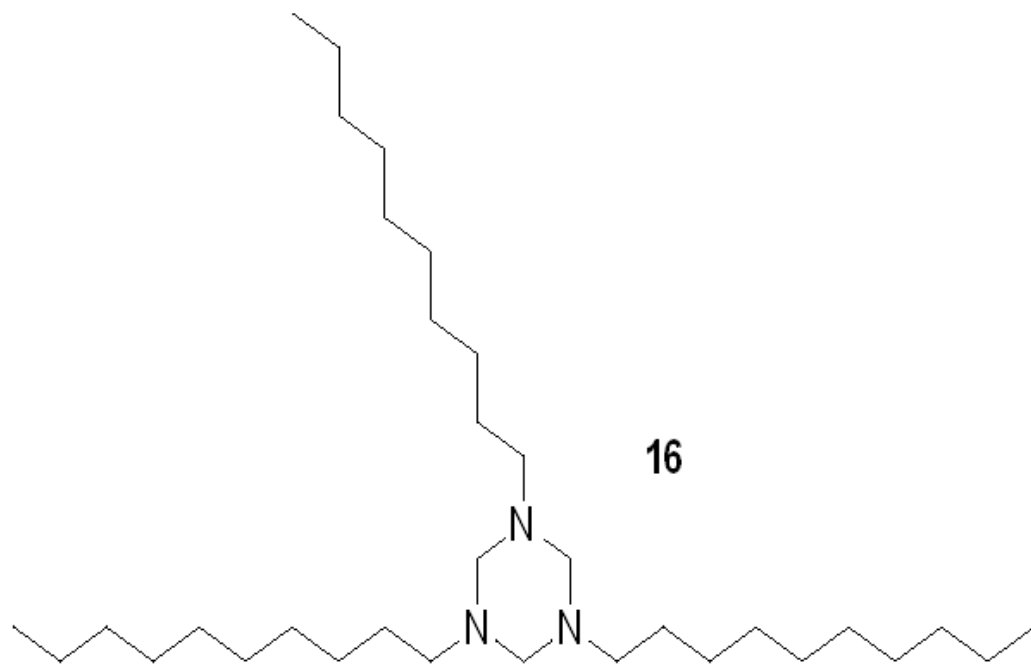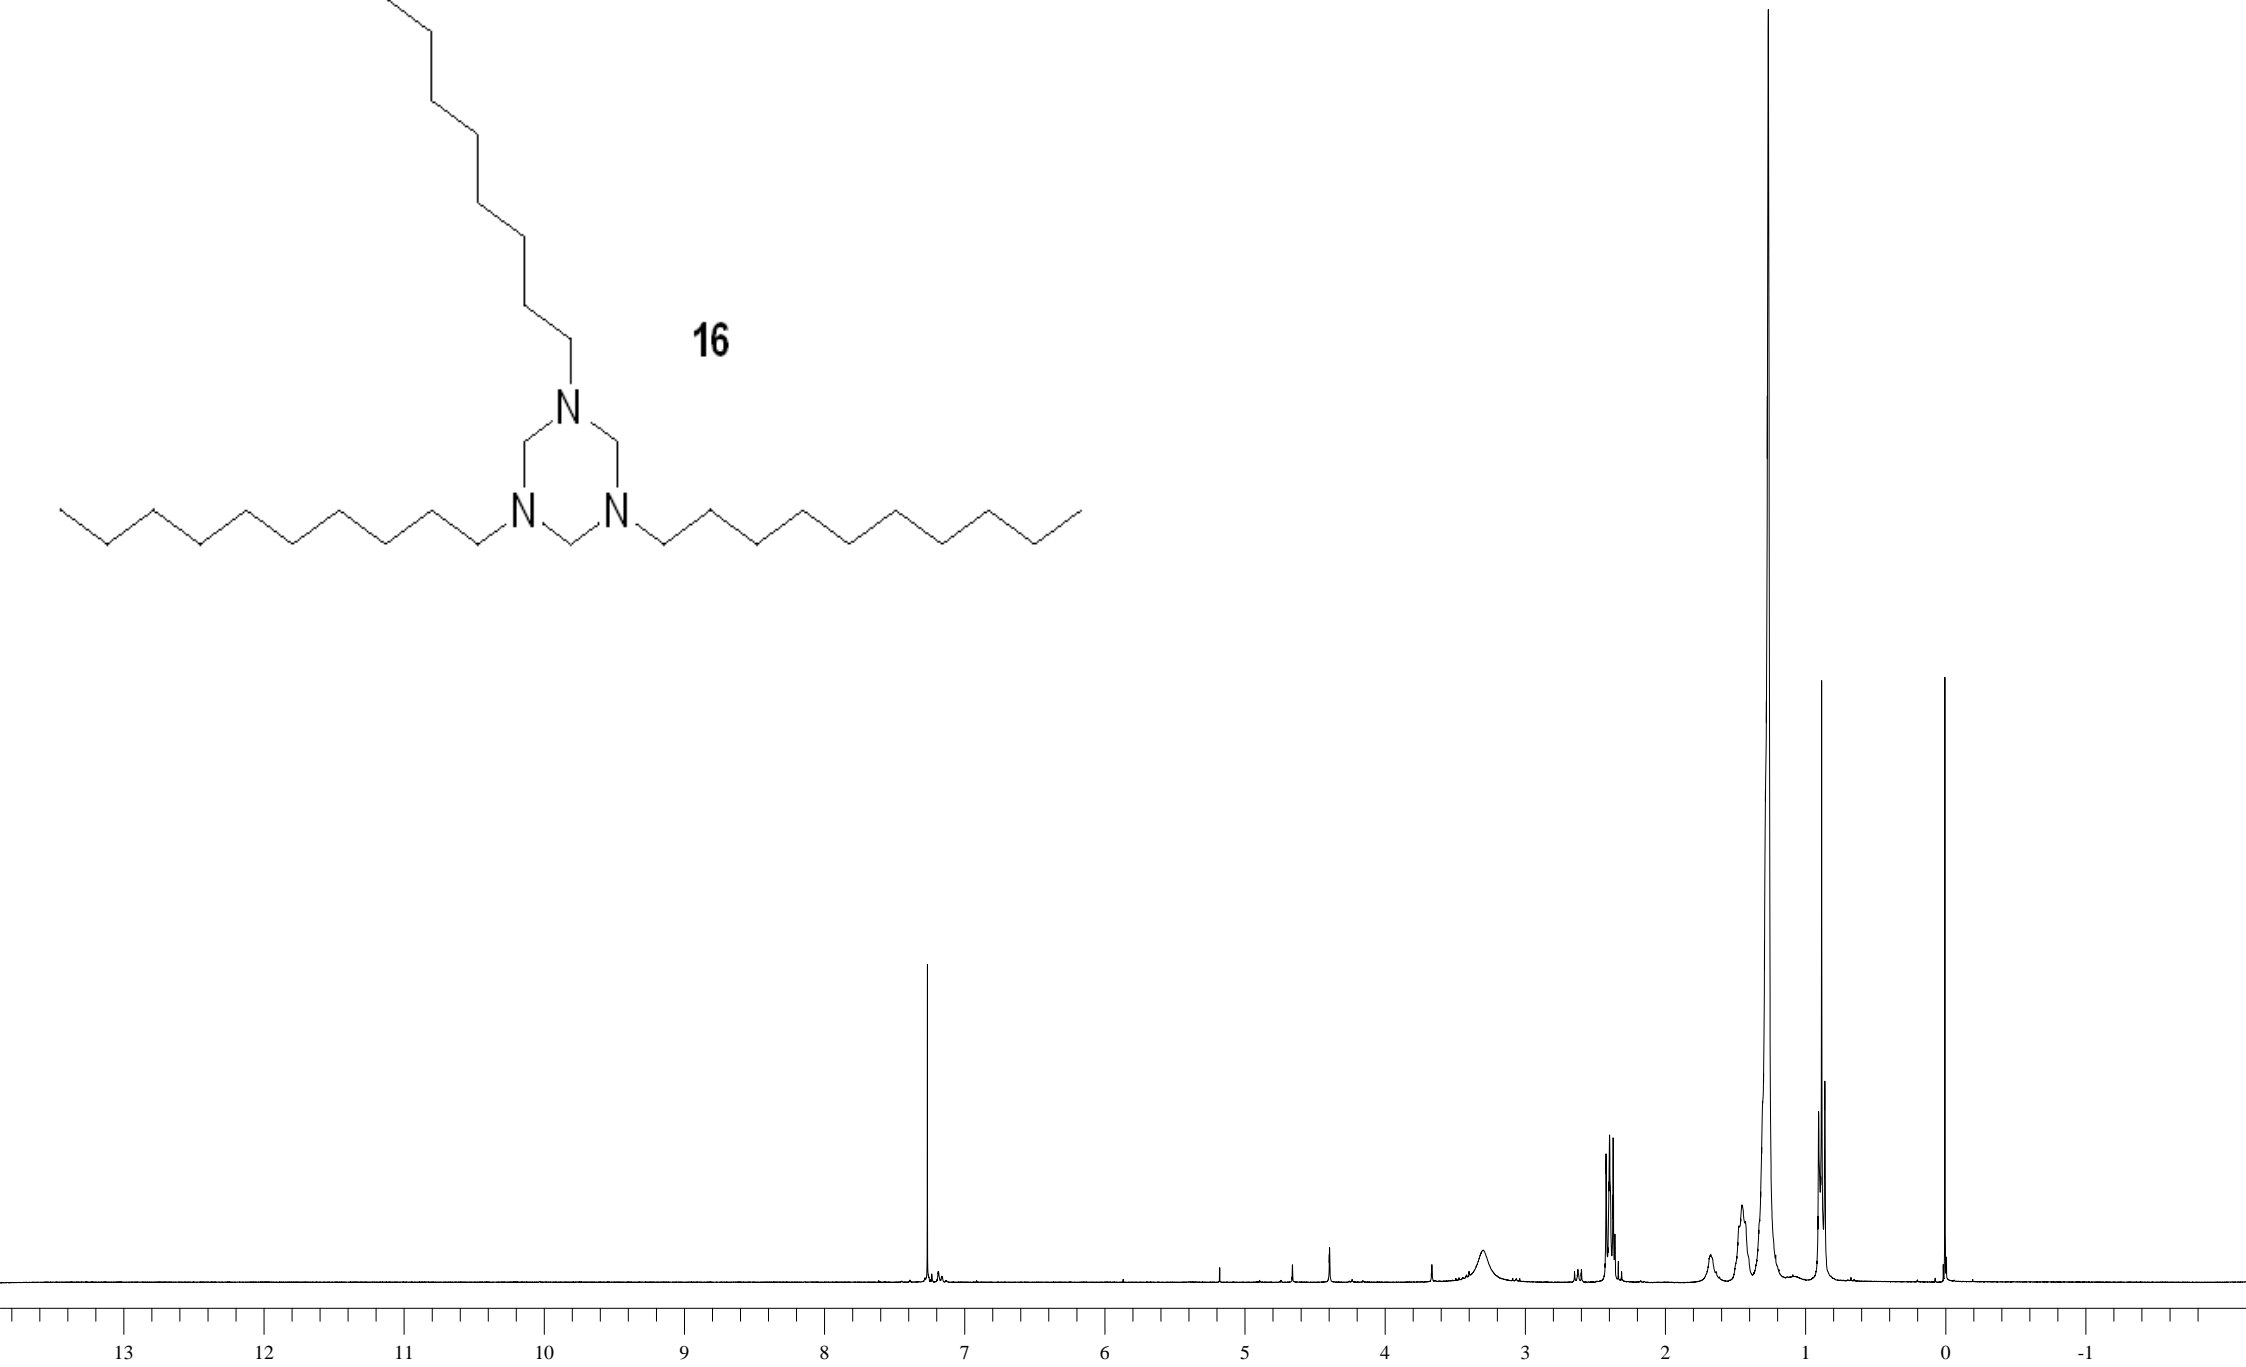

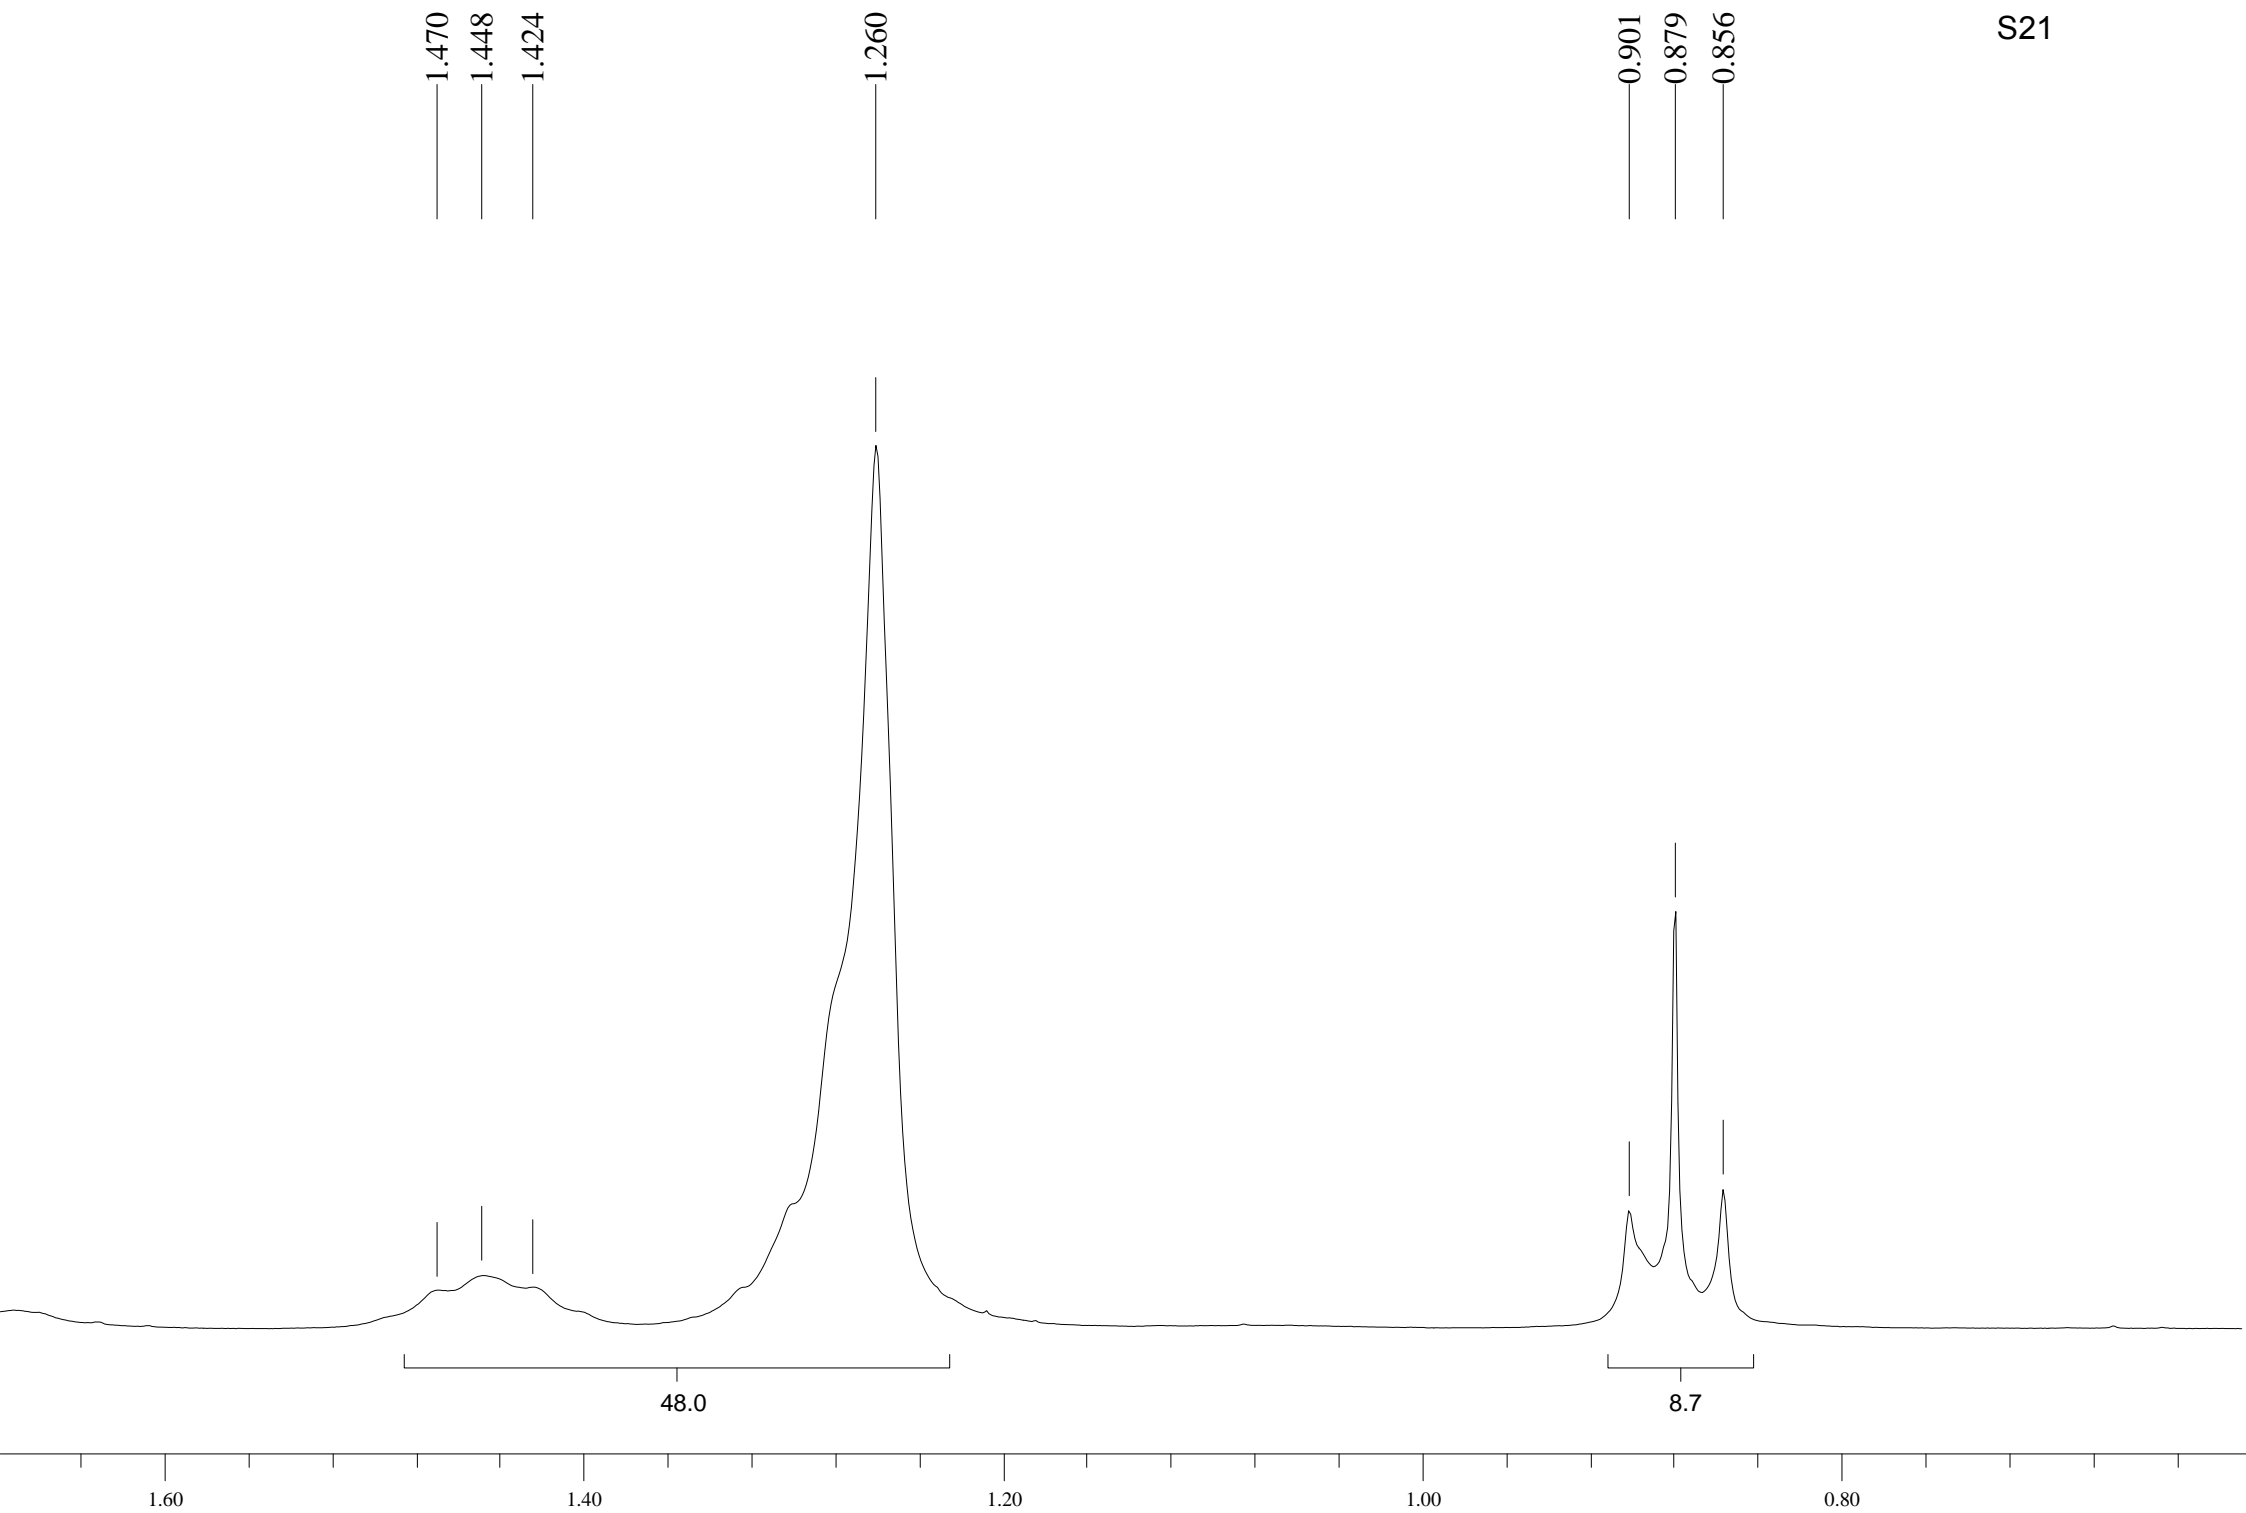

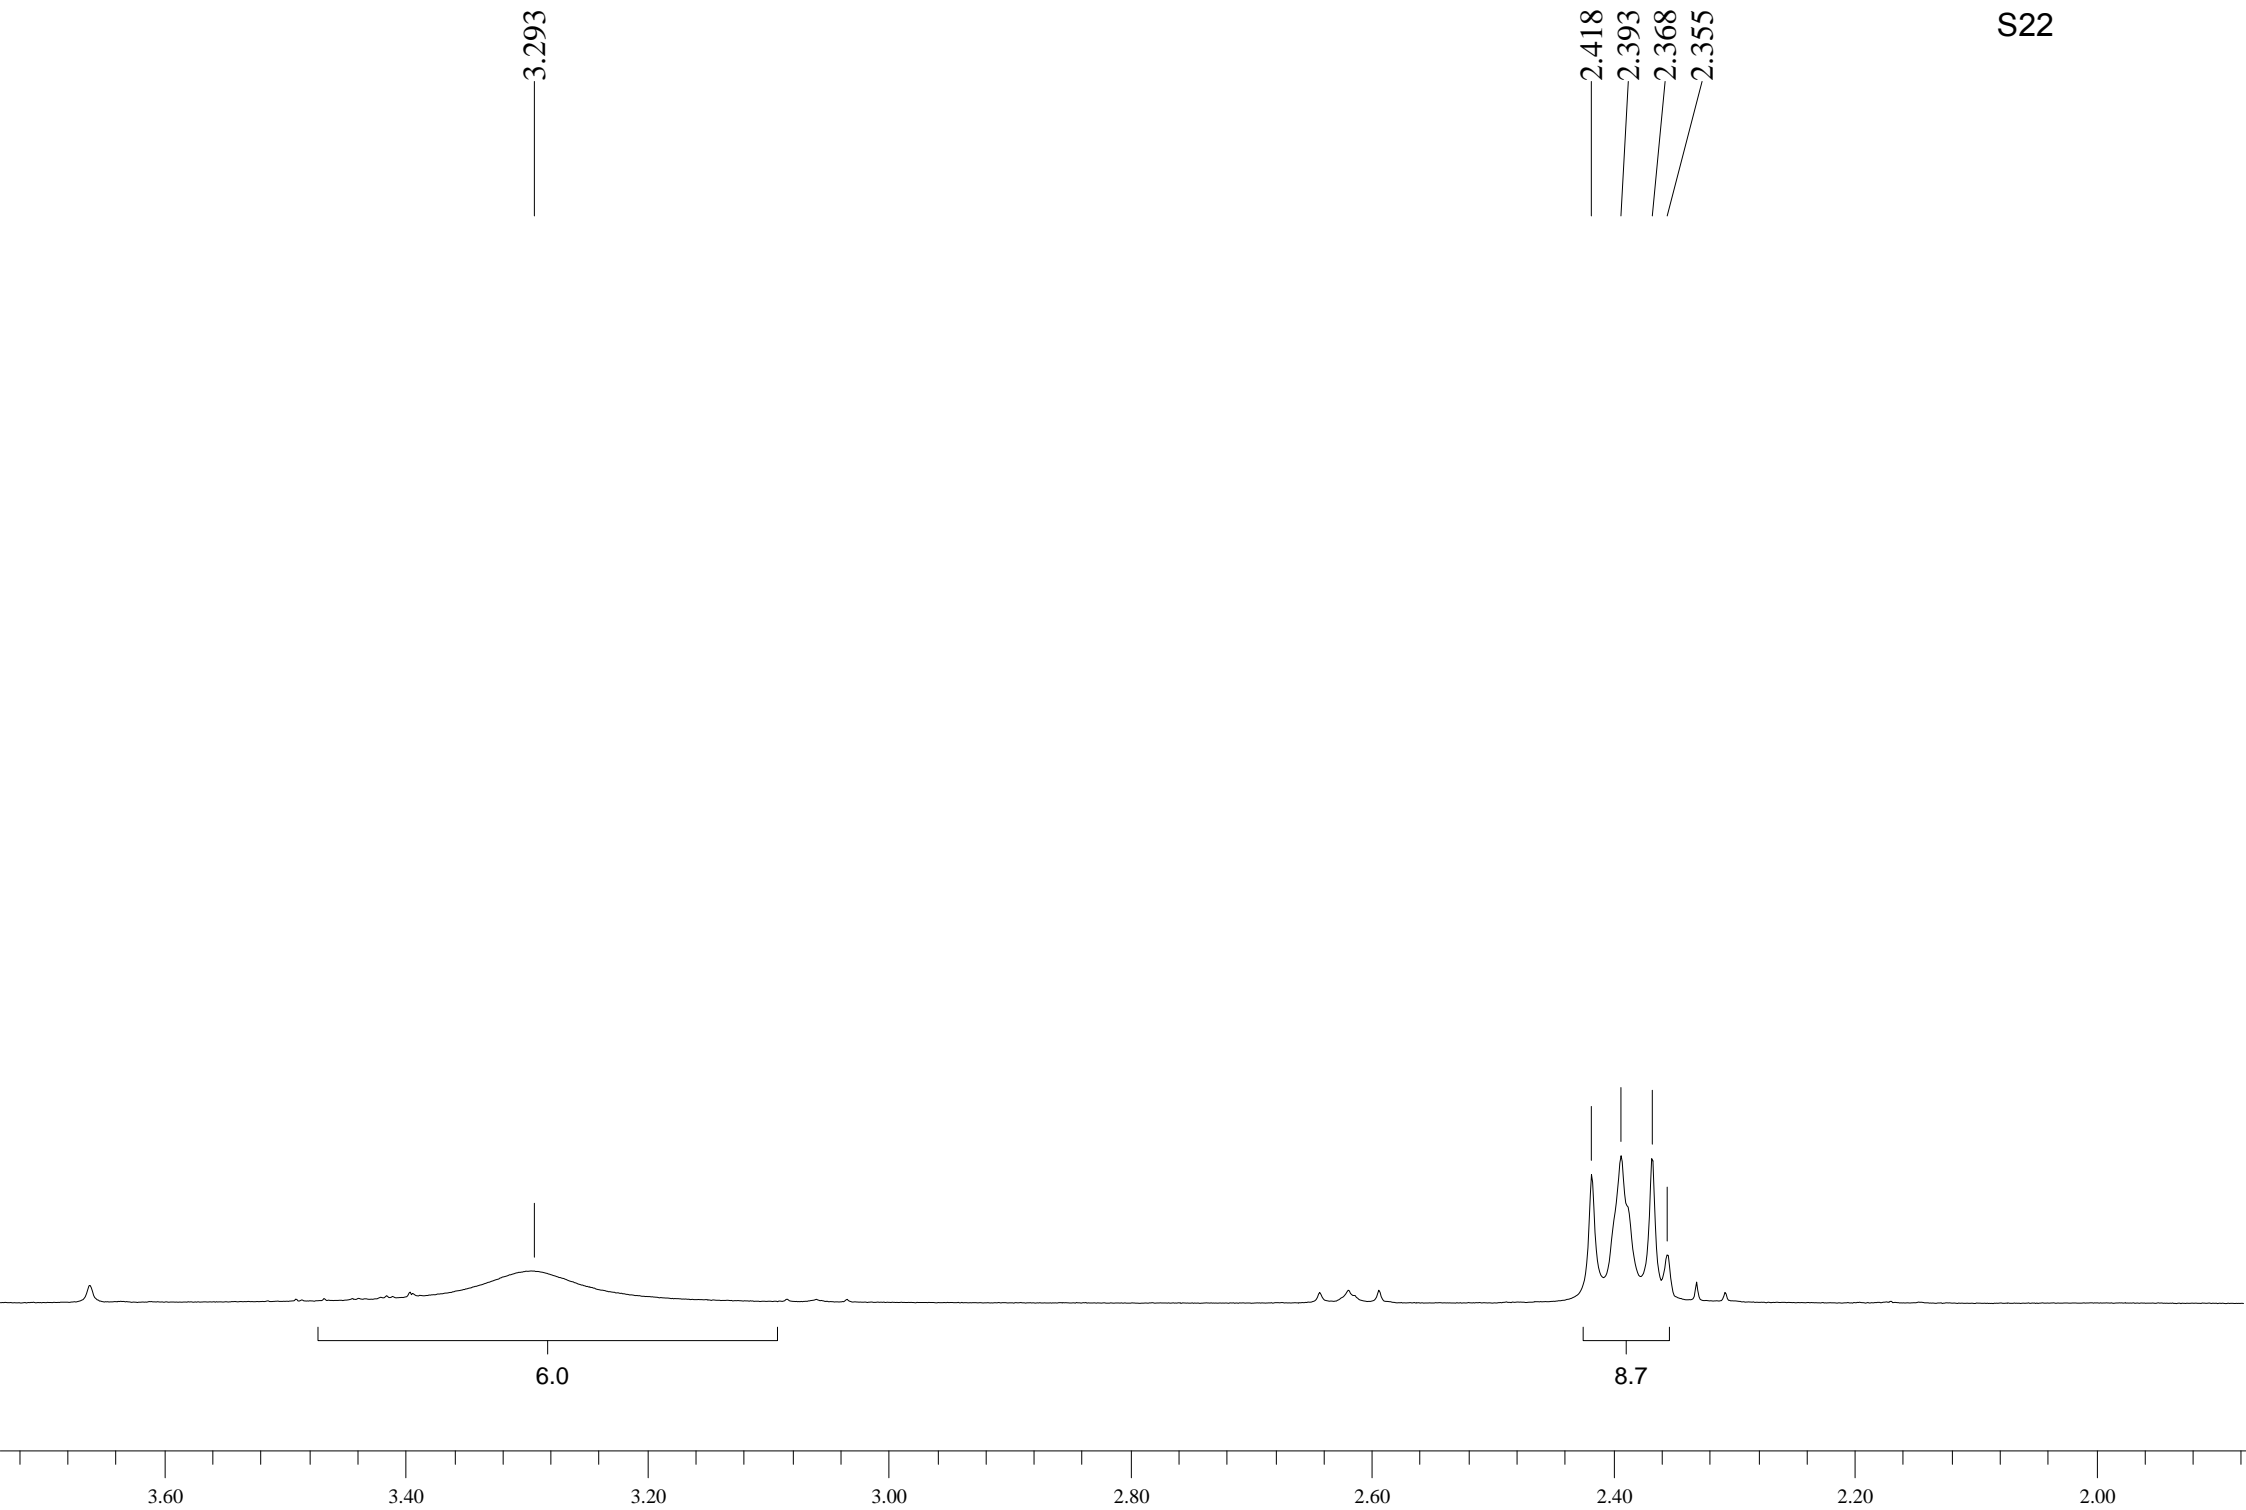

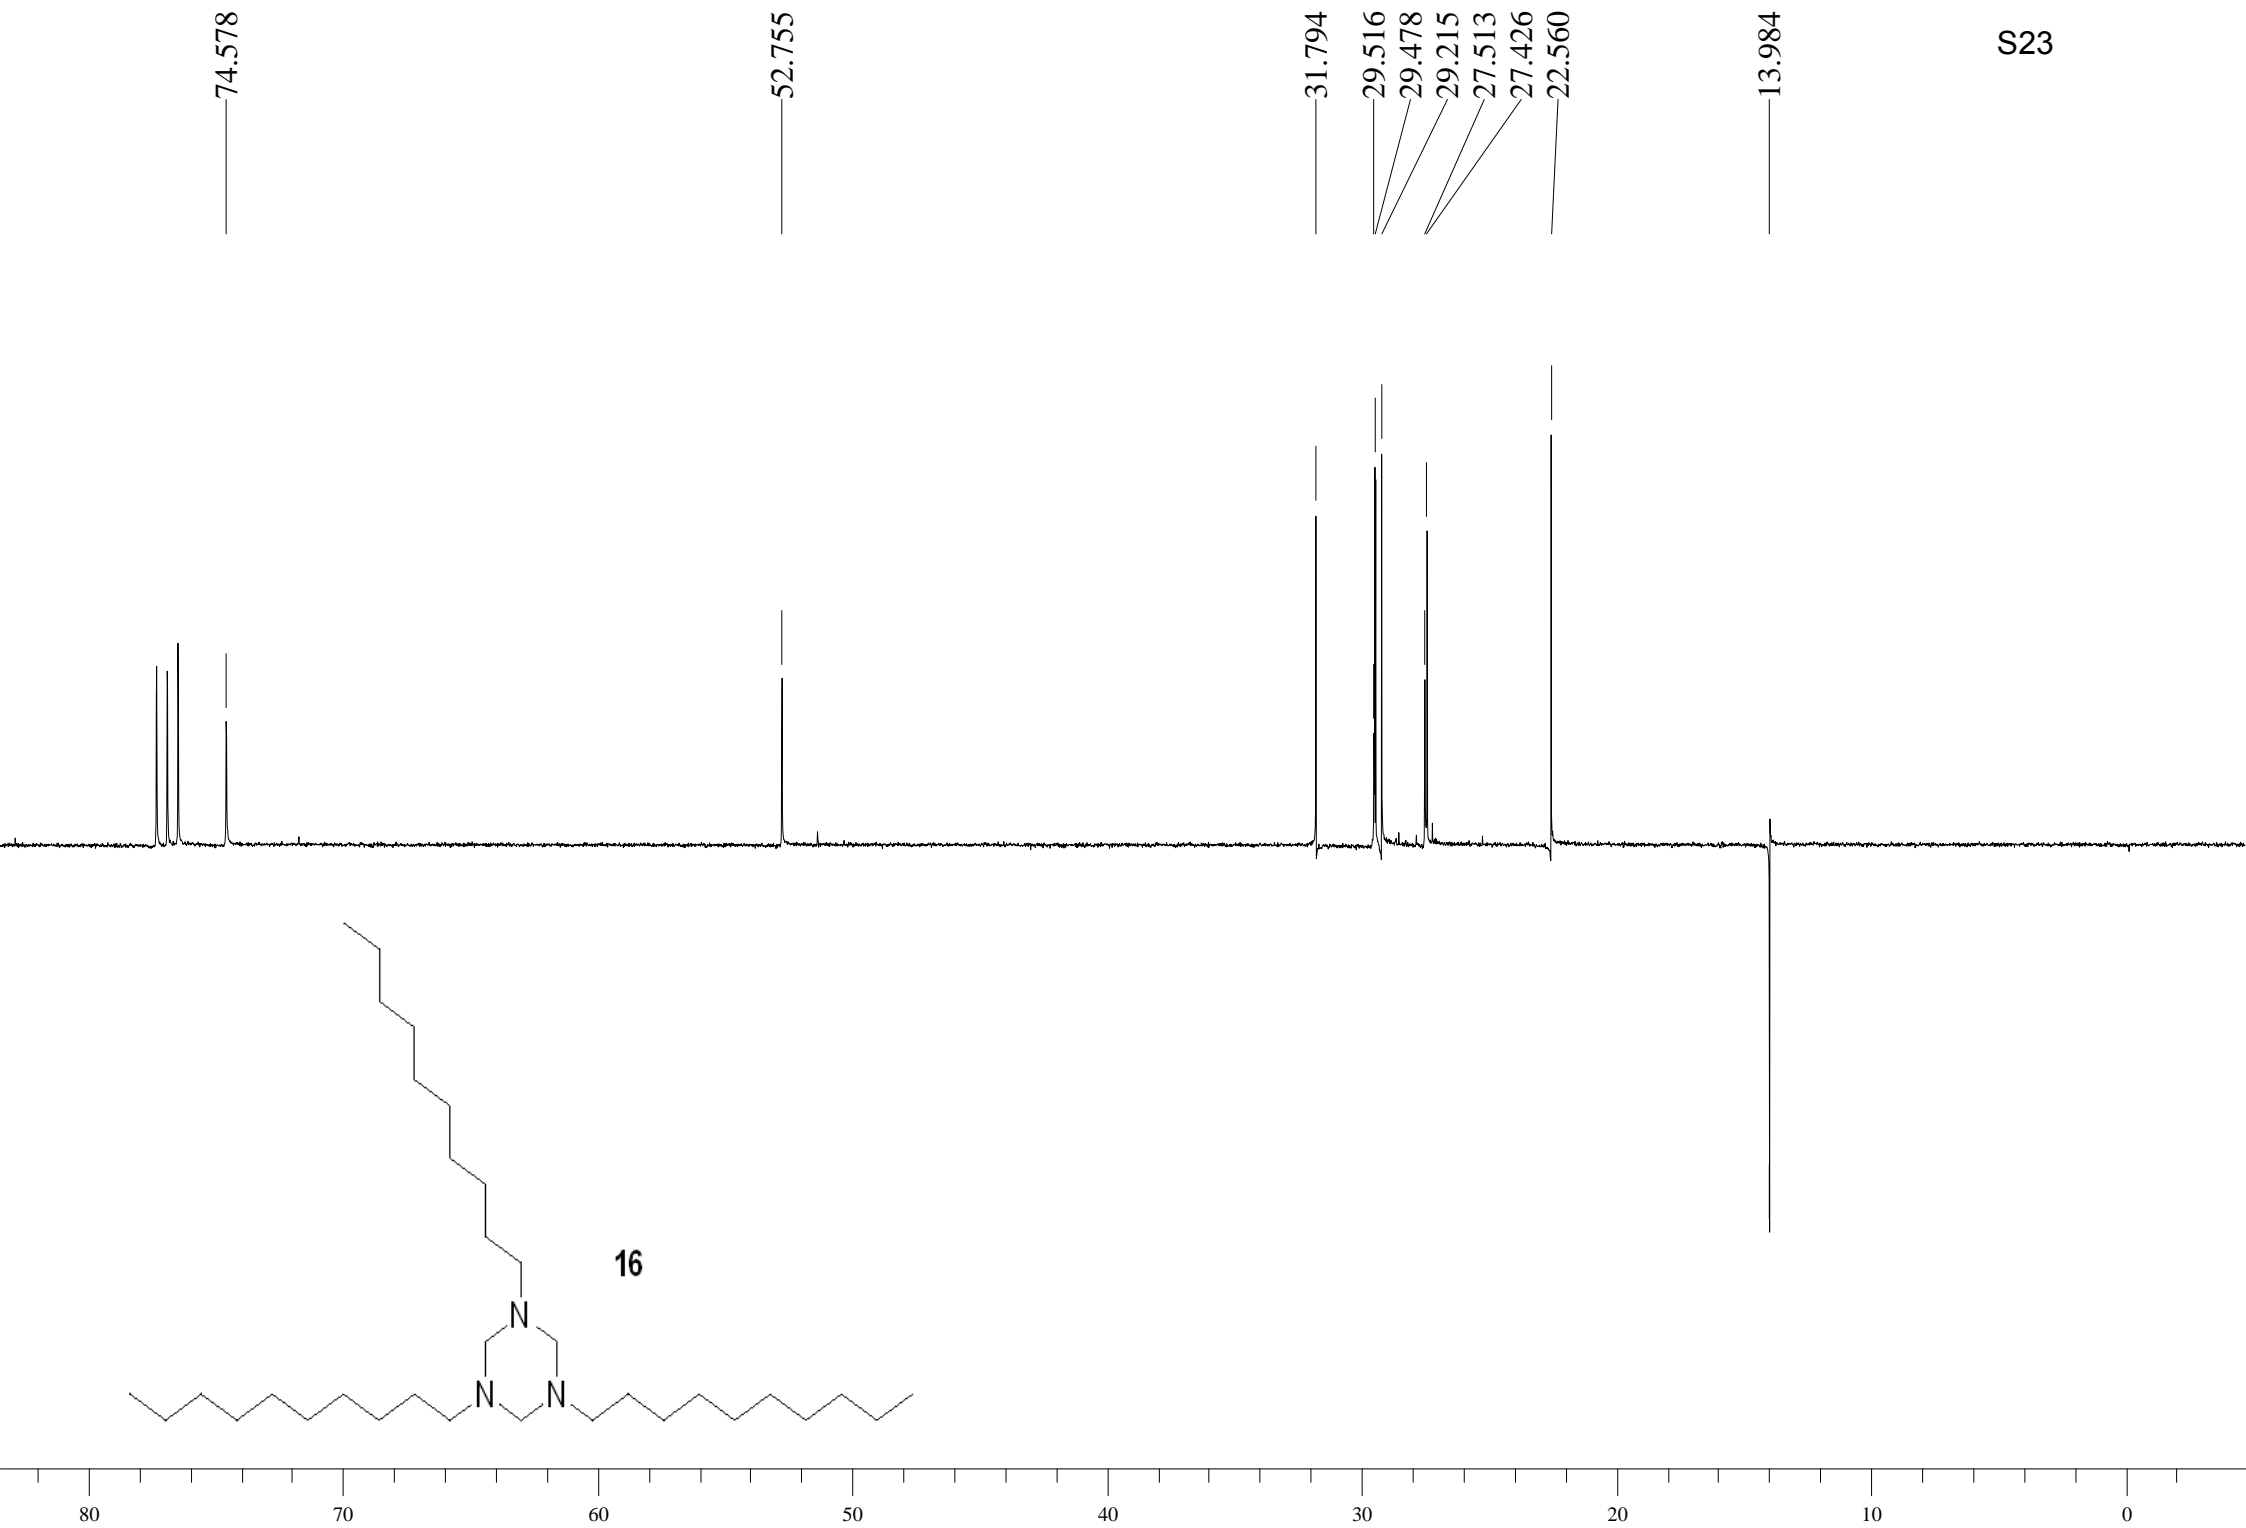

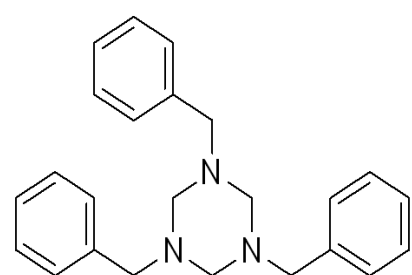

17

3430,06 cm<sup>-1</sup>3083,87 cm<sup>-1</sup>3060,68 cm<sup>-1</sup>2952,47 cm<sup>-1</sup>2888,82 cm<sup>-1</sup>3022,58 cm<sup>-1</sup>2850,79 cm<sup>-1</sup>2773,73 cm<sup>-1</sup>2805,94 cm<sup>-1</sup>1951,93 cm<sup>-1</sup>1601,89 cm<sup>-1</sup>1397,85 cm<sup>-1</sup>1201,07 cm<sup>-1</sup>1229,12 cm<sup>-1</sup>822,89 cm<sup>-1</sup>878,57 cm<sup>-1</sup>853,25 cm<sup>-1</sup>1131,83 cm<sup>-1</sup>1313,91 cm<sup>-1</sup>1118,61 cm<sup>-1</sup>1064,59 cm<sup>-1</sup>1260,08 cm<sup>-1</sup>919,74 cm<sup>-1</sup>907,02 cm<sup>-1</sup>1014,26 cm<sup>-1</sup>985,56 cm<sup>-1</sup>1355,79 cm<sup>-1</sup>1028,81 cm<sup>-1</sup>1150,85 cm<sup>-1</sup>1494,08 cm<sup>-1</sup>1452,44 cm<sup>-1</sup>1168,65 cm<sup>-1</sup>704,42 cm<sup>-1</sup>697,14 cm<sup>-1</sup>736,45 cm<sup>-1</sup>

3500

3000

2500

2000

1500

1000

cm<sup>-1</sup>

Descrição

Op. Vania\_1

Marcelo



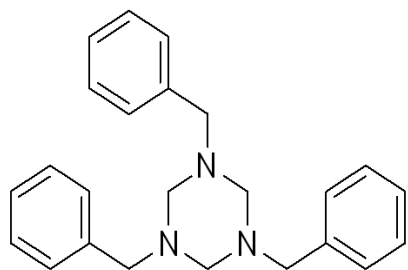

17

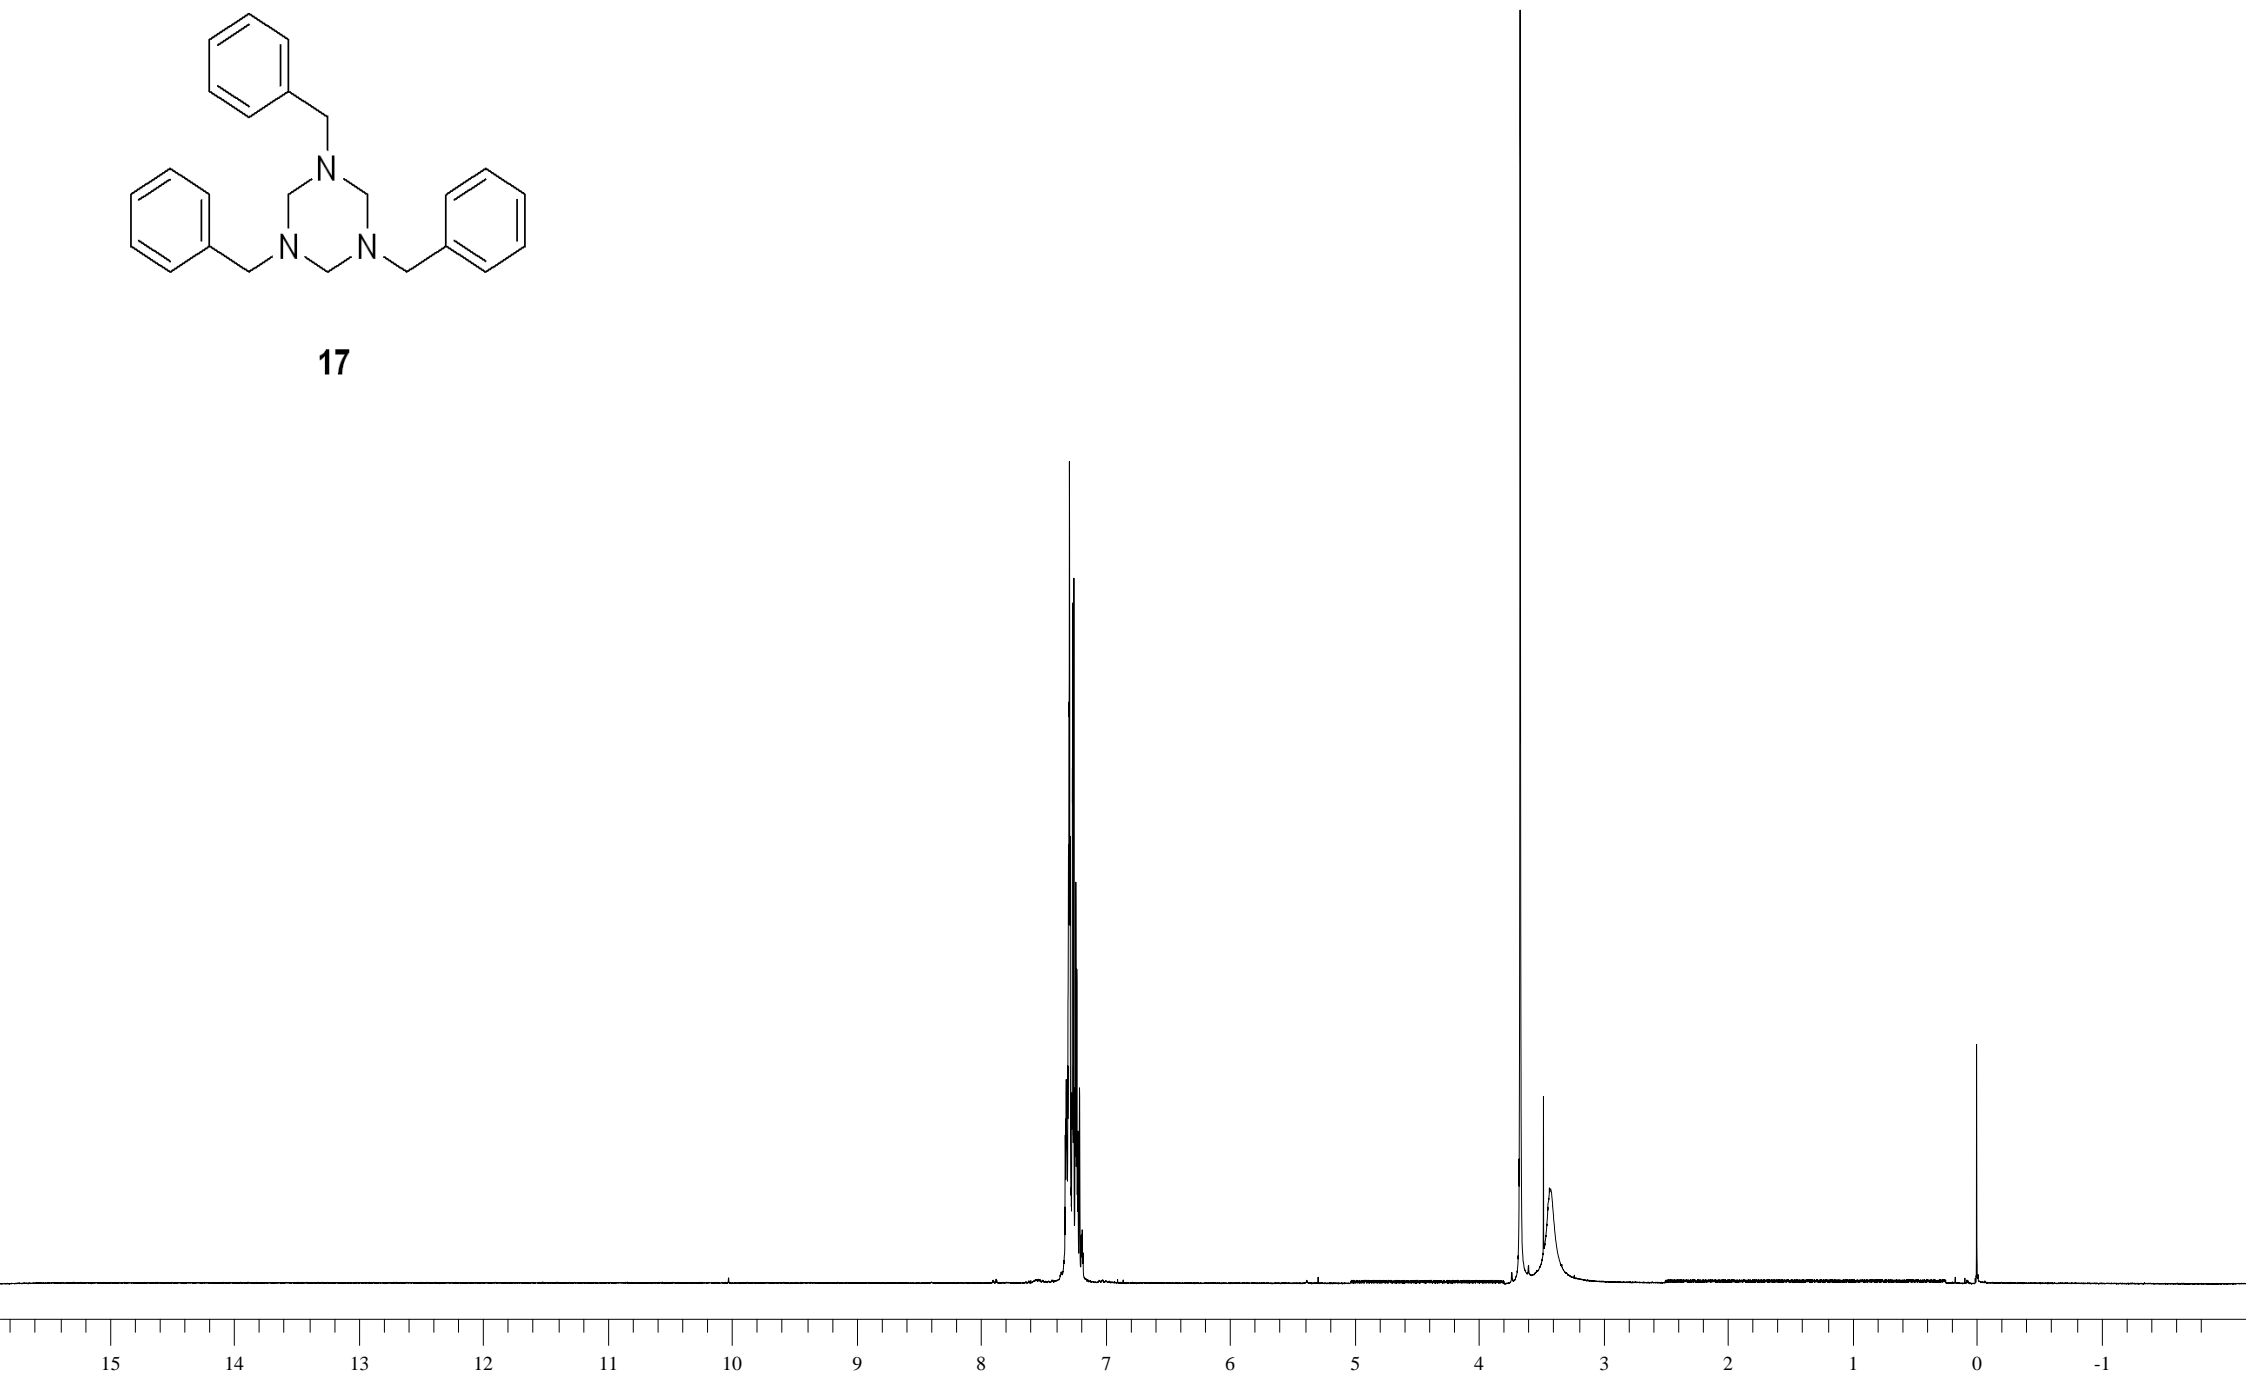

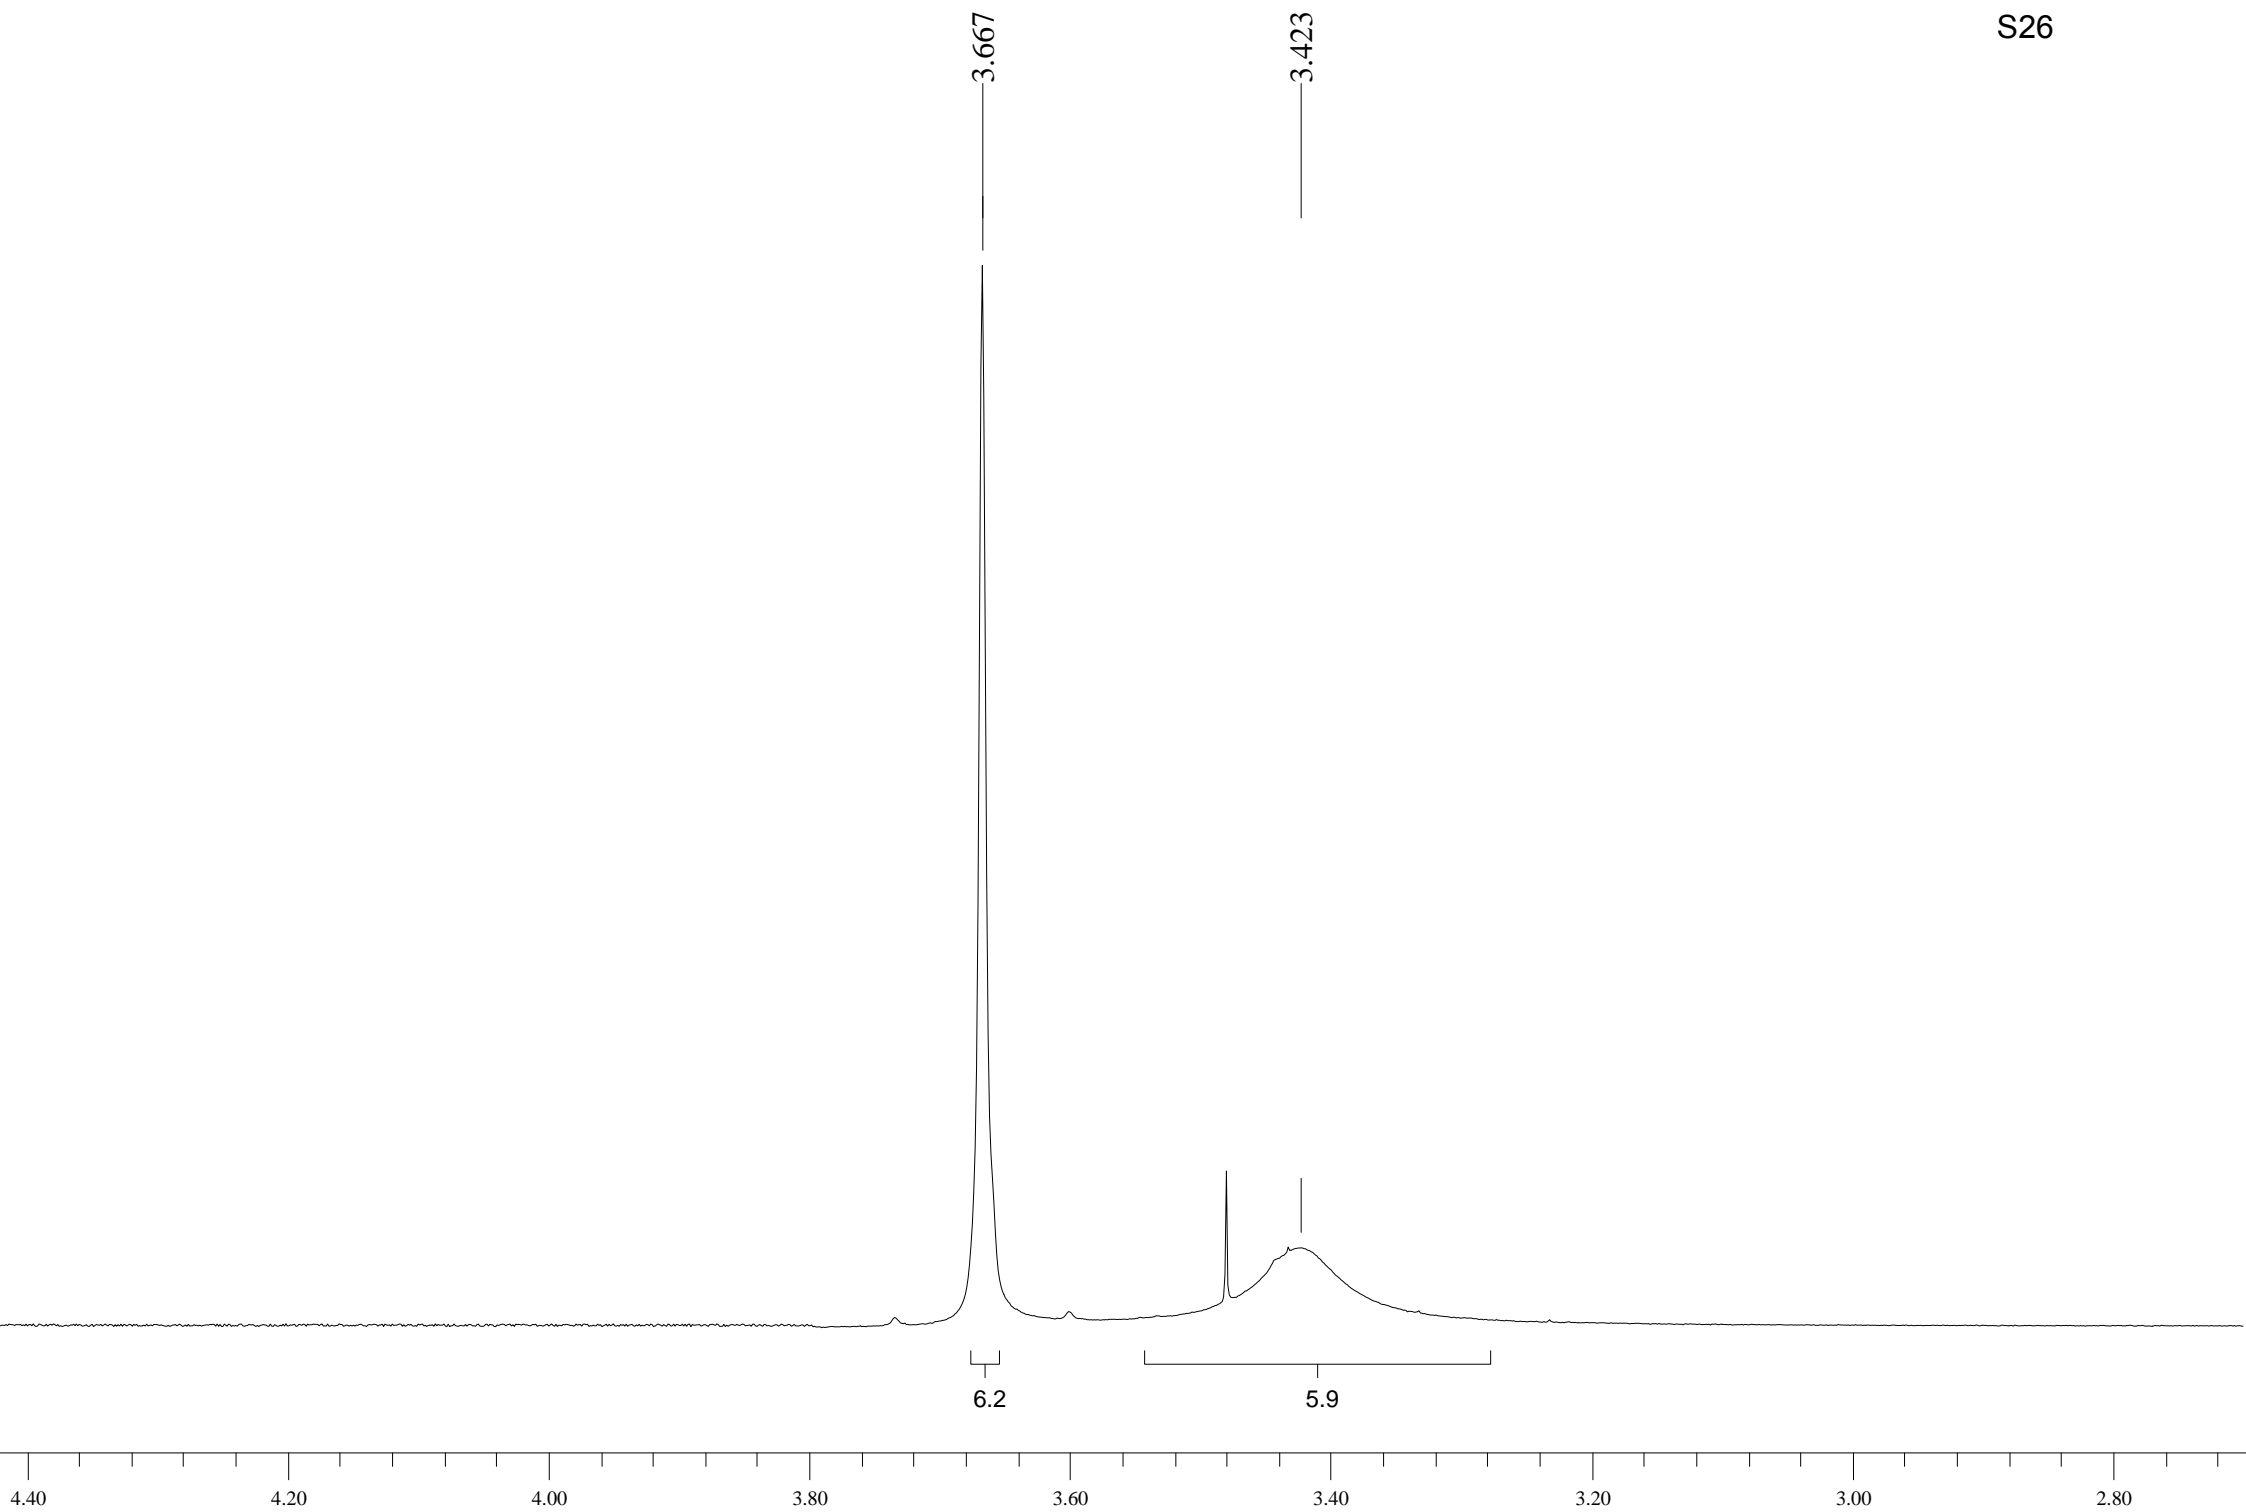

7.322  
7.314  
7.288  
7.261  
7.252  
7.243  
7.237  
7.229  
7.219  
7.207  
7.194  
7.185  
7.179

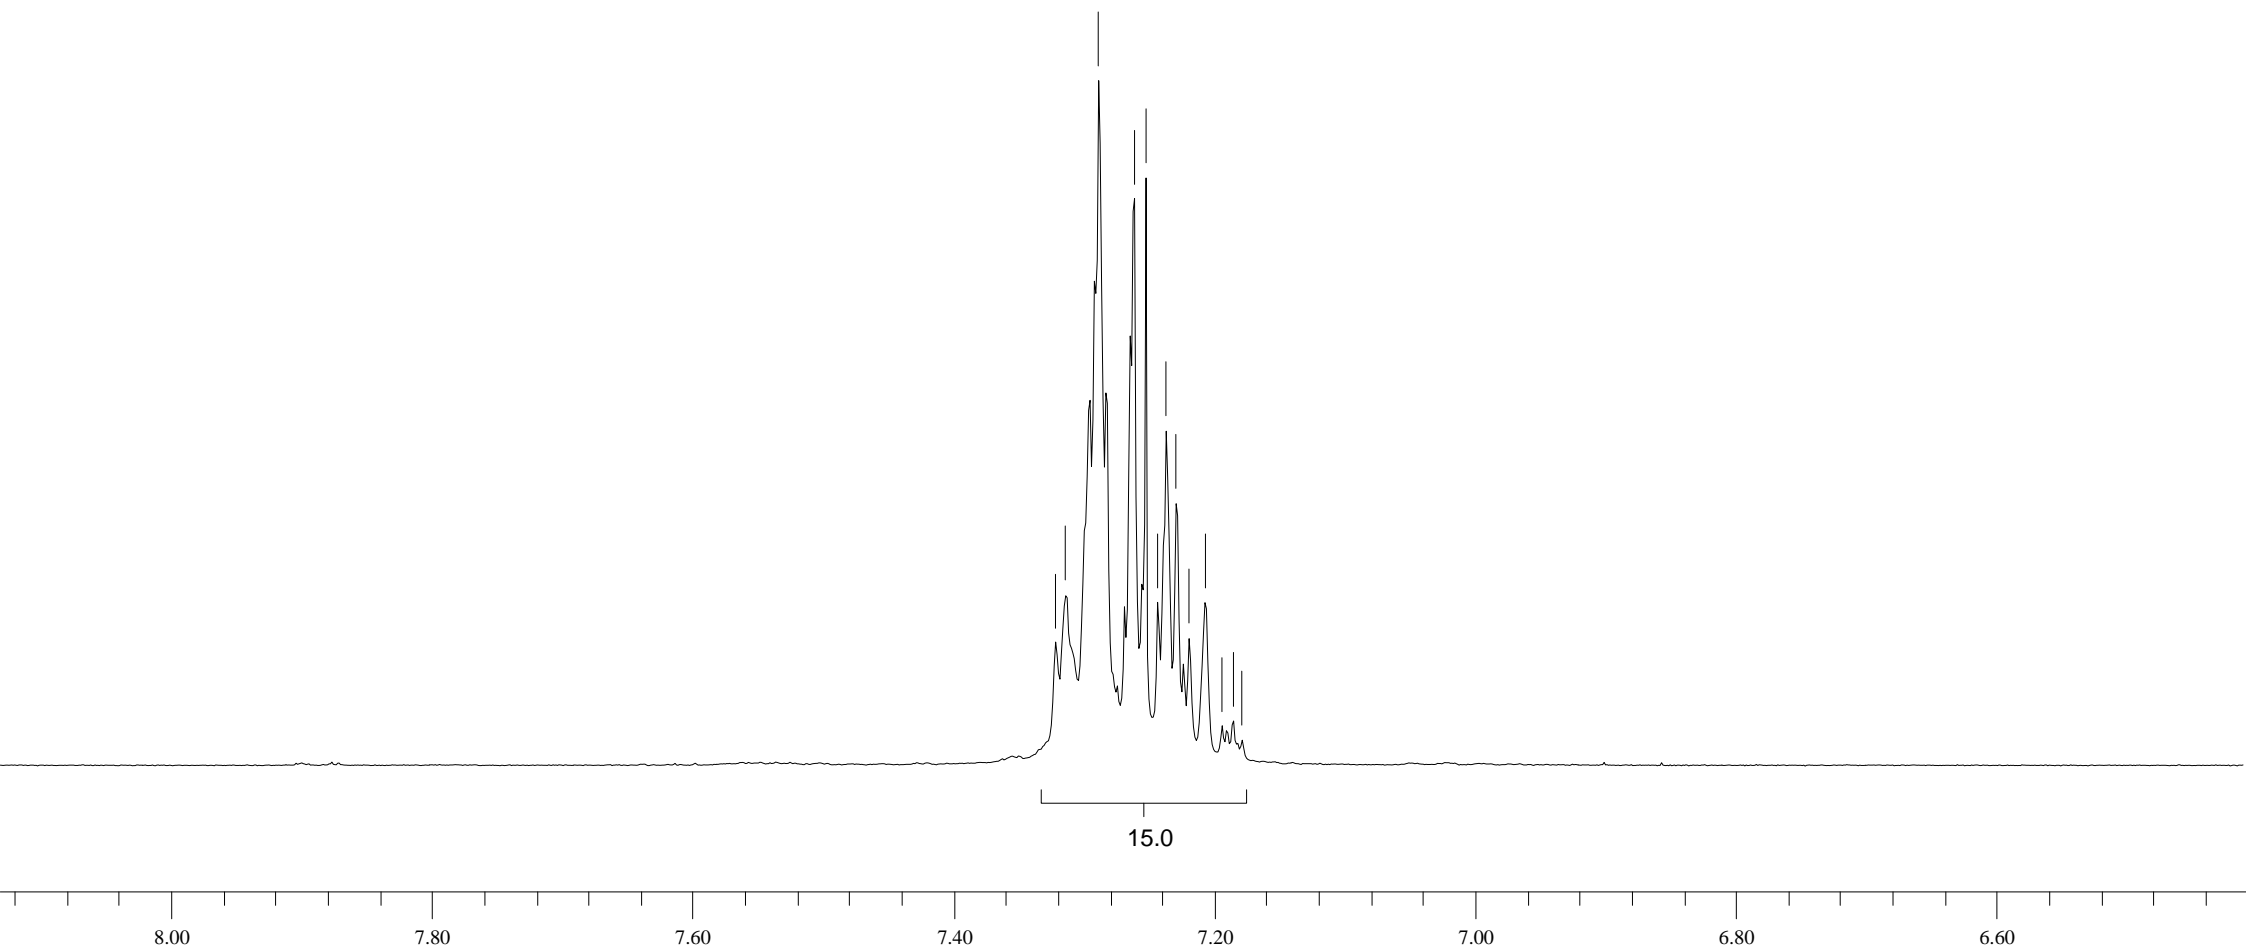

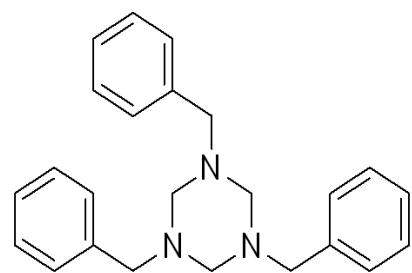

17

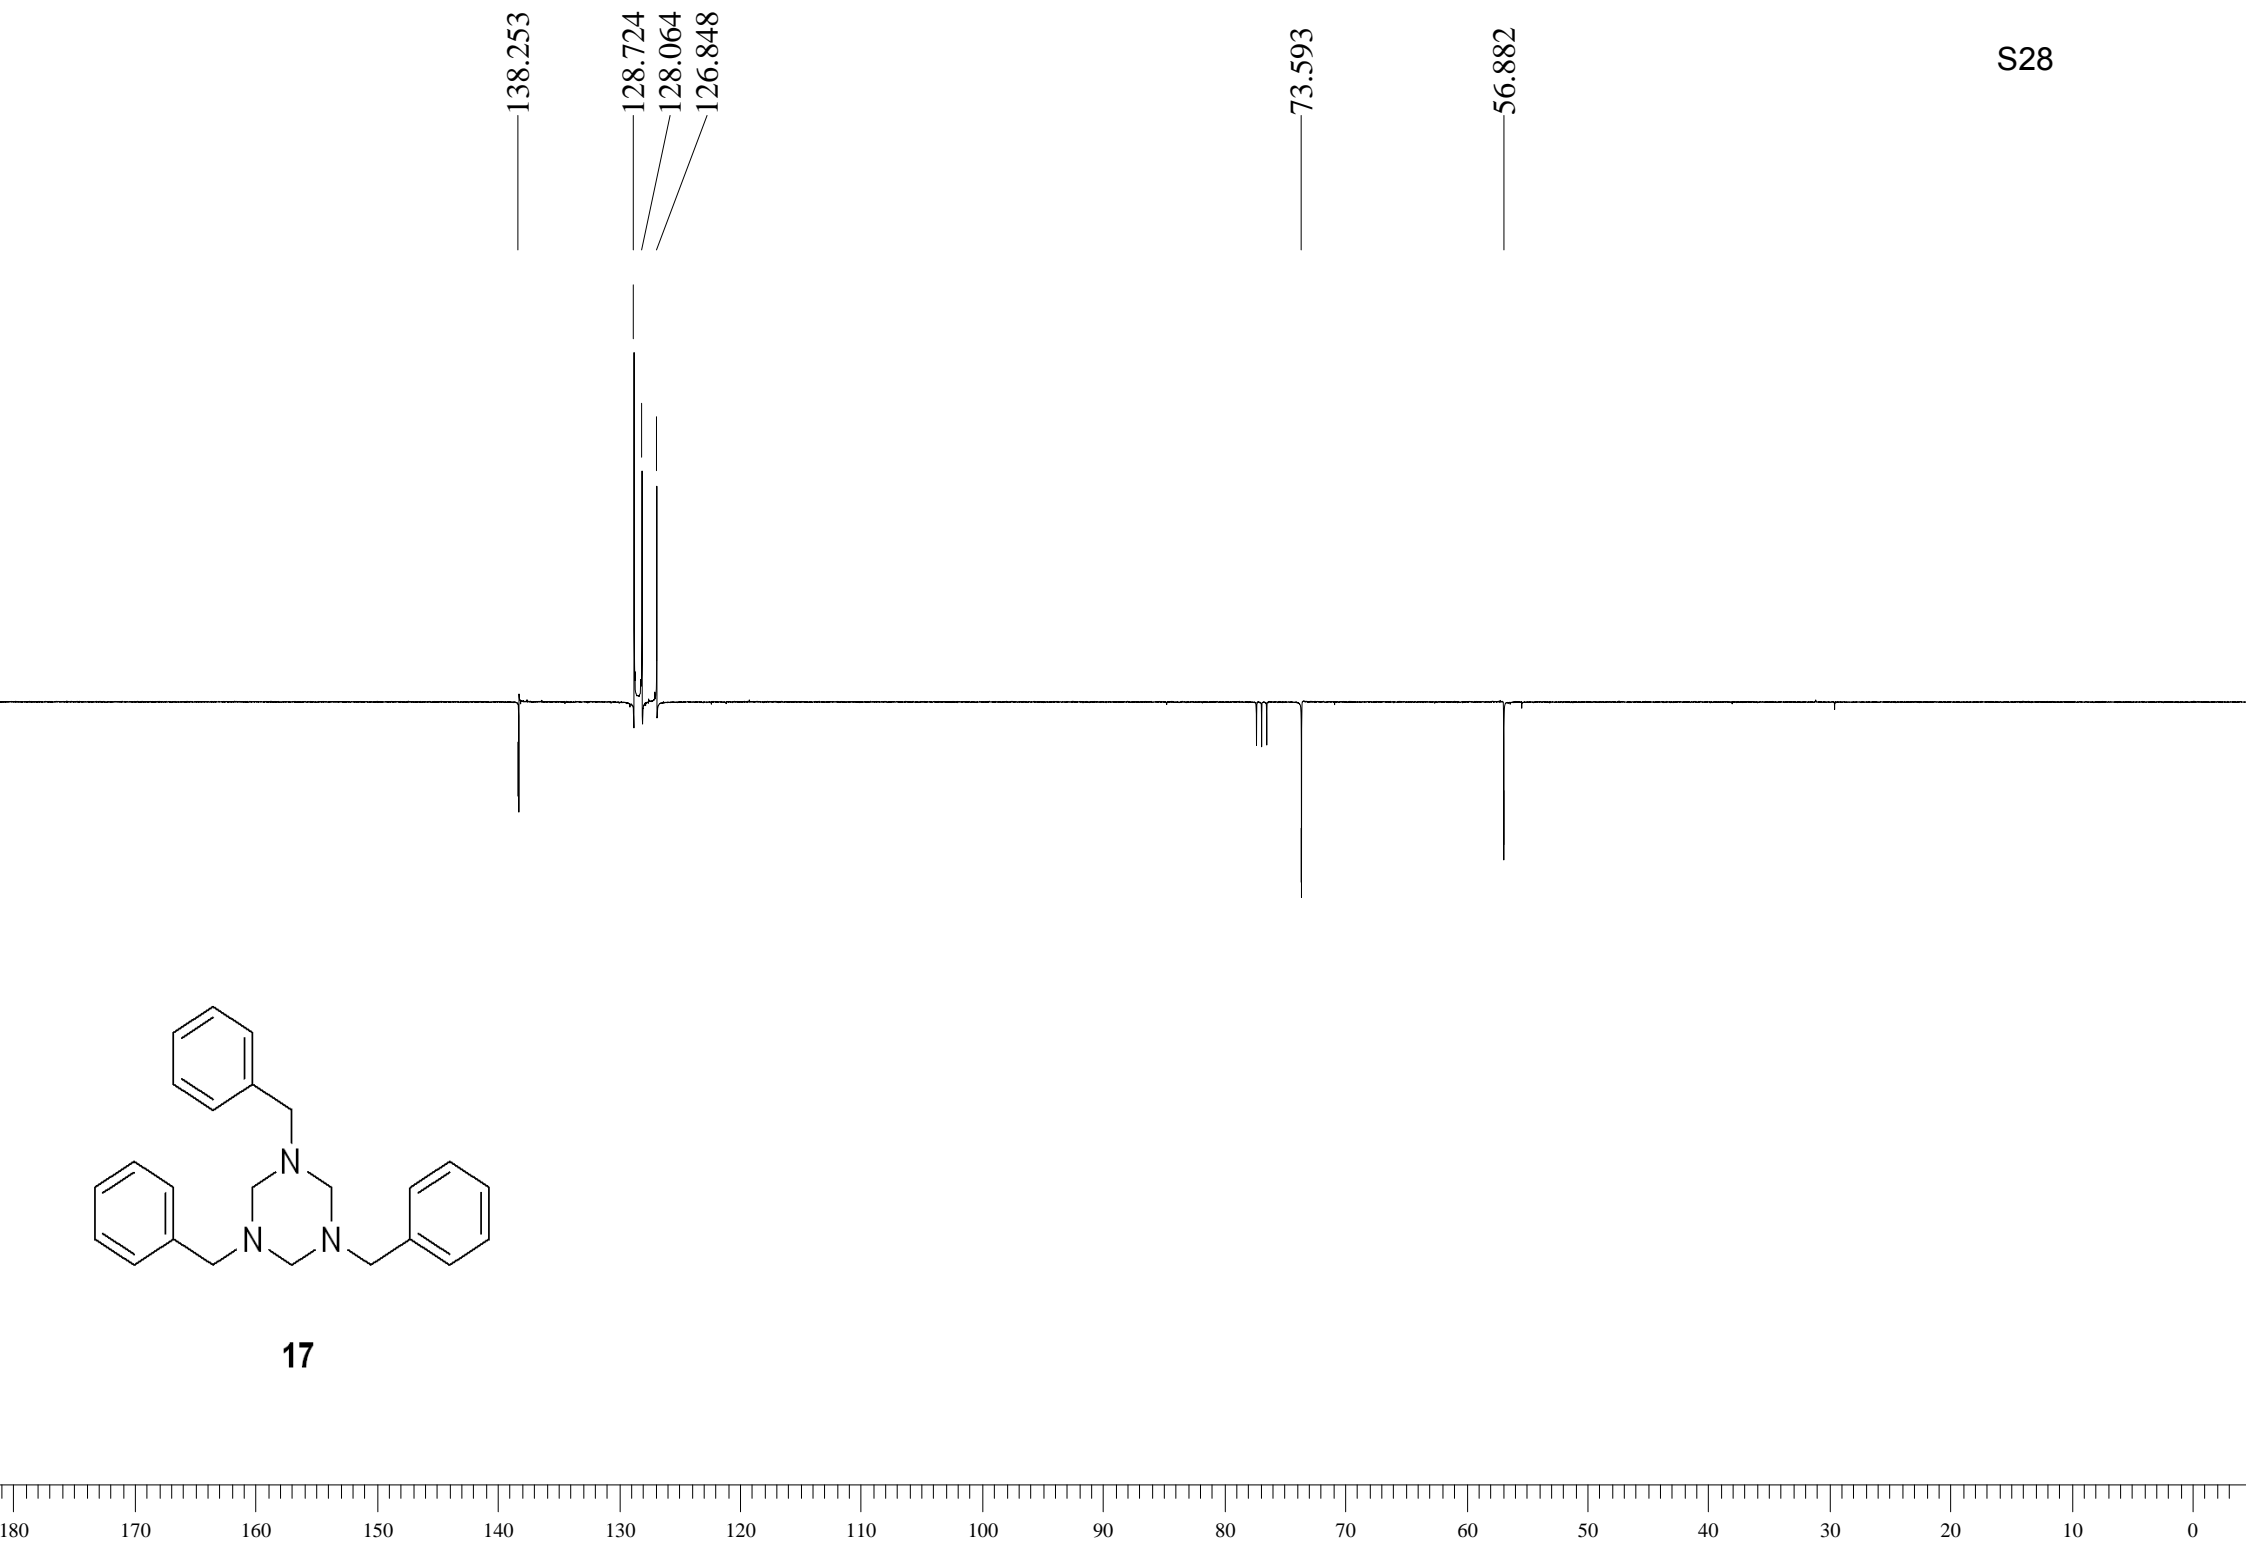

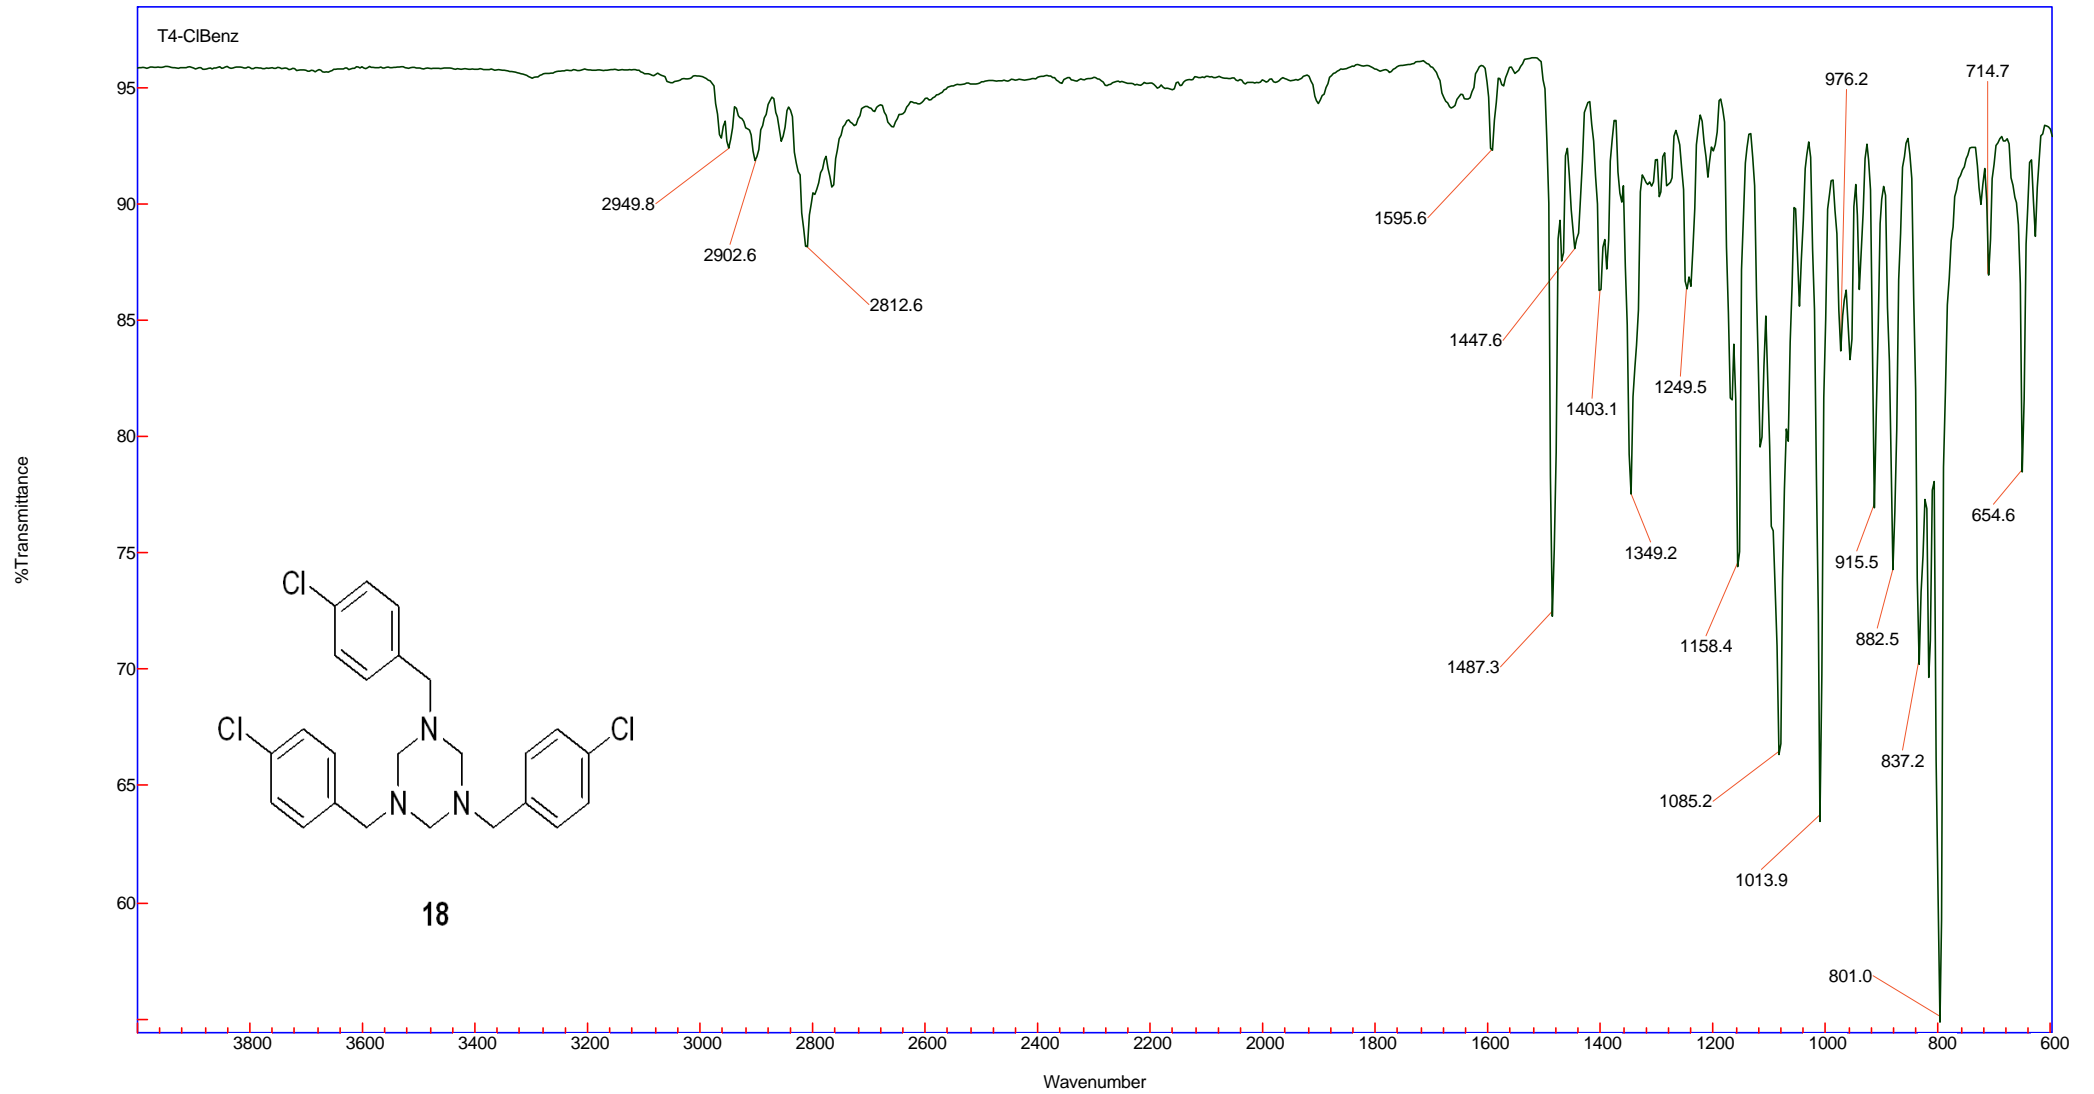

|             |
|-------------|
| Name        |
| T4-ClBenz — |

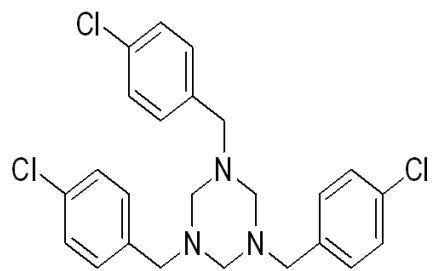

18

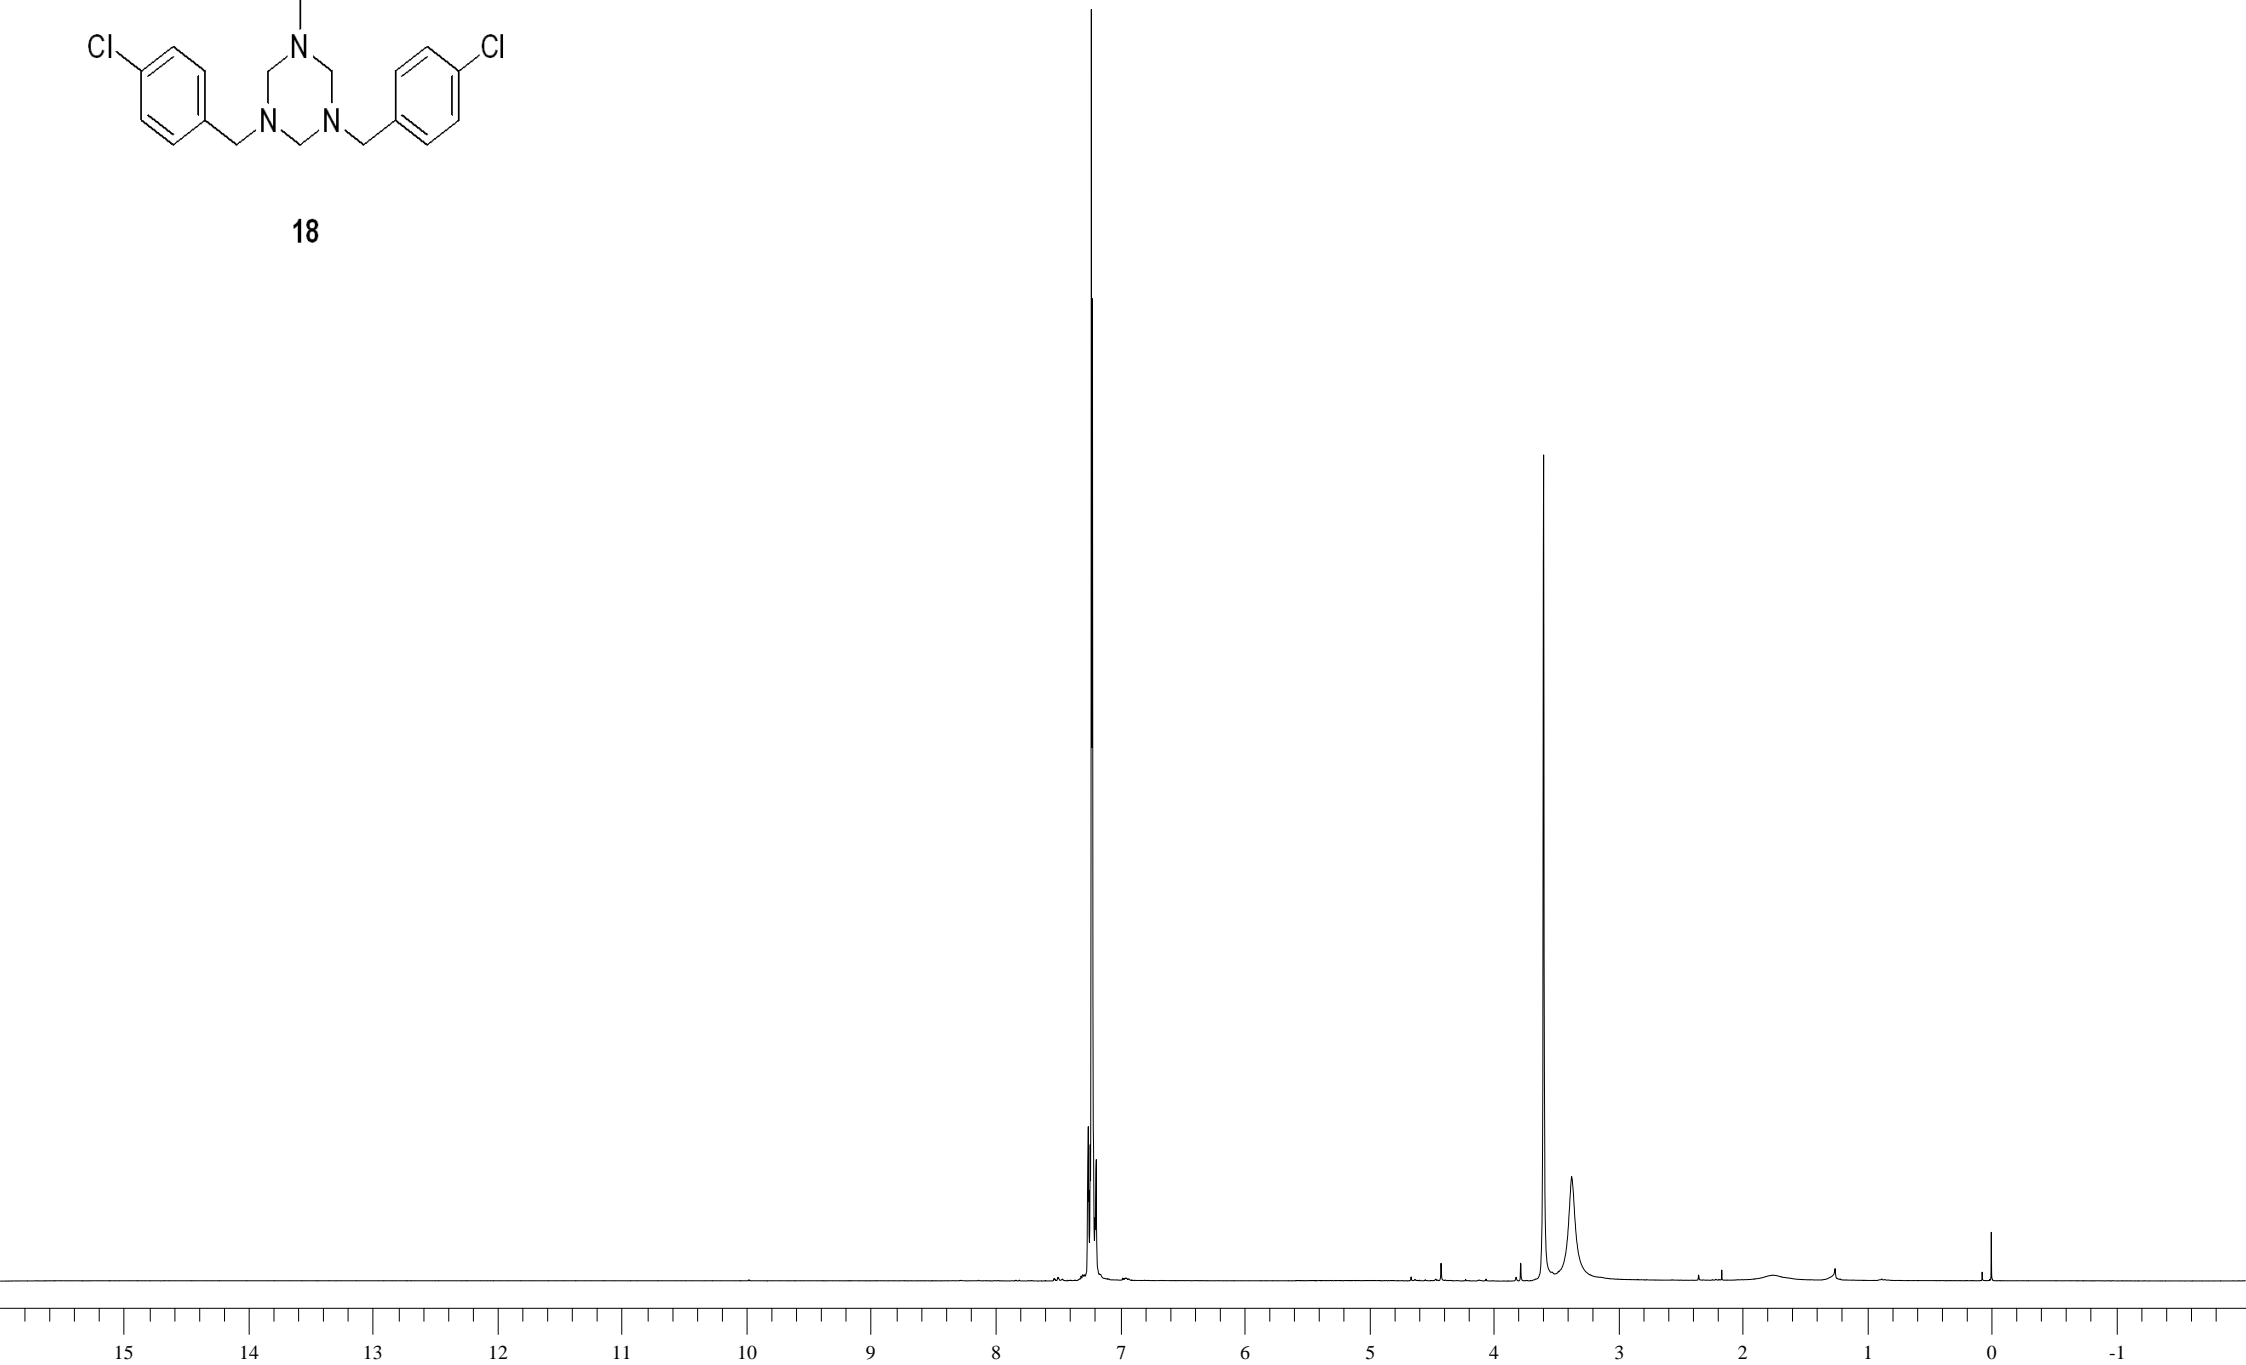

3.595

3.371

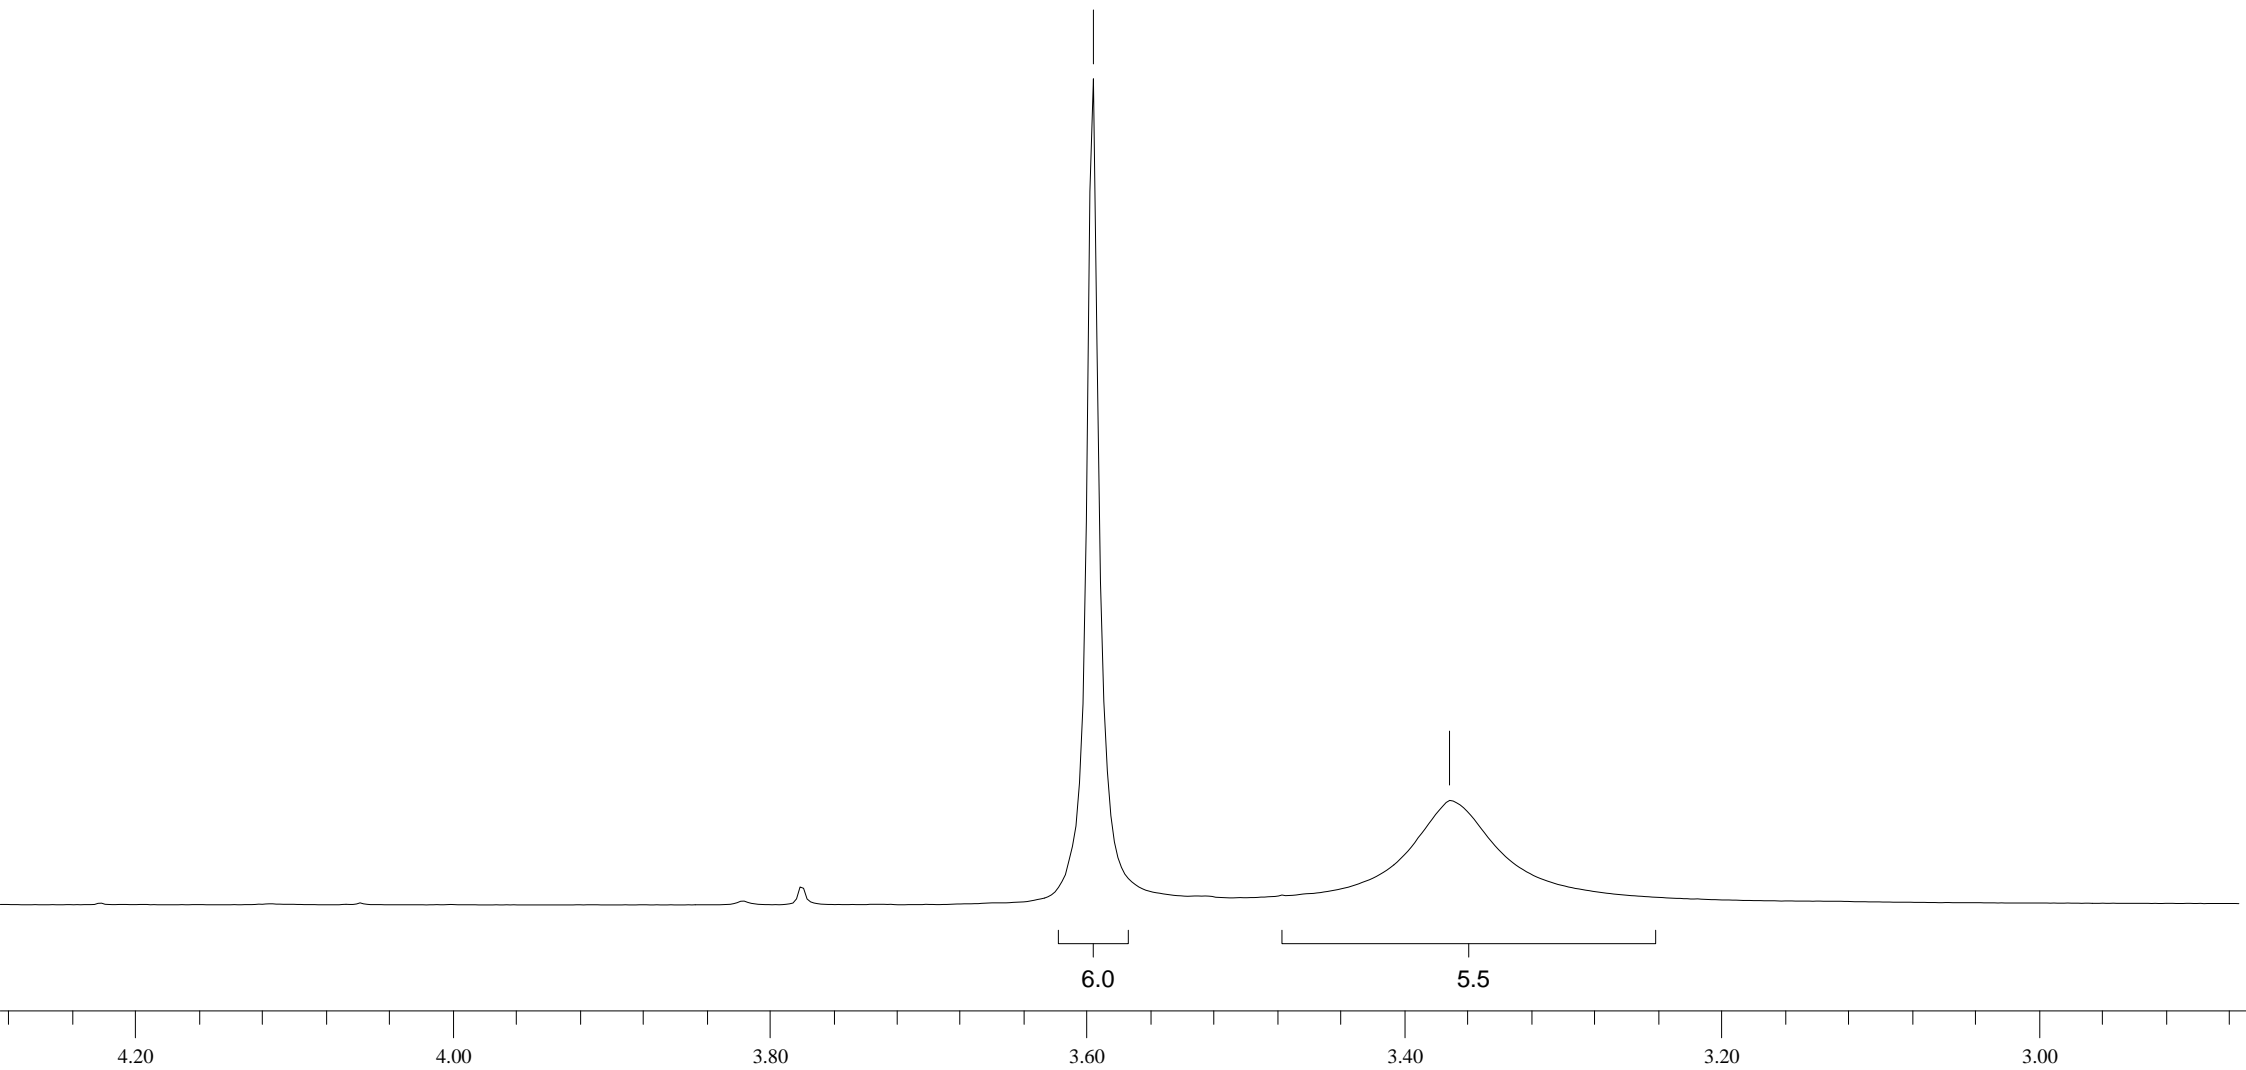

7.253  
7.248  
7.238  
7.229  
7.220  
7.198  
7.189

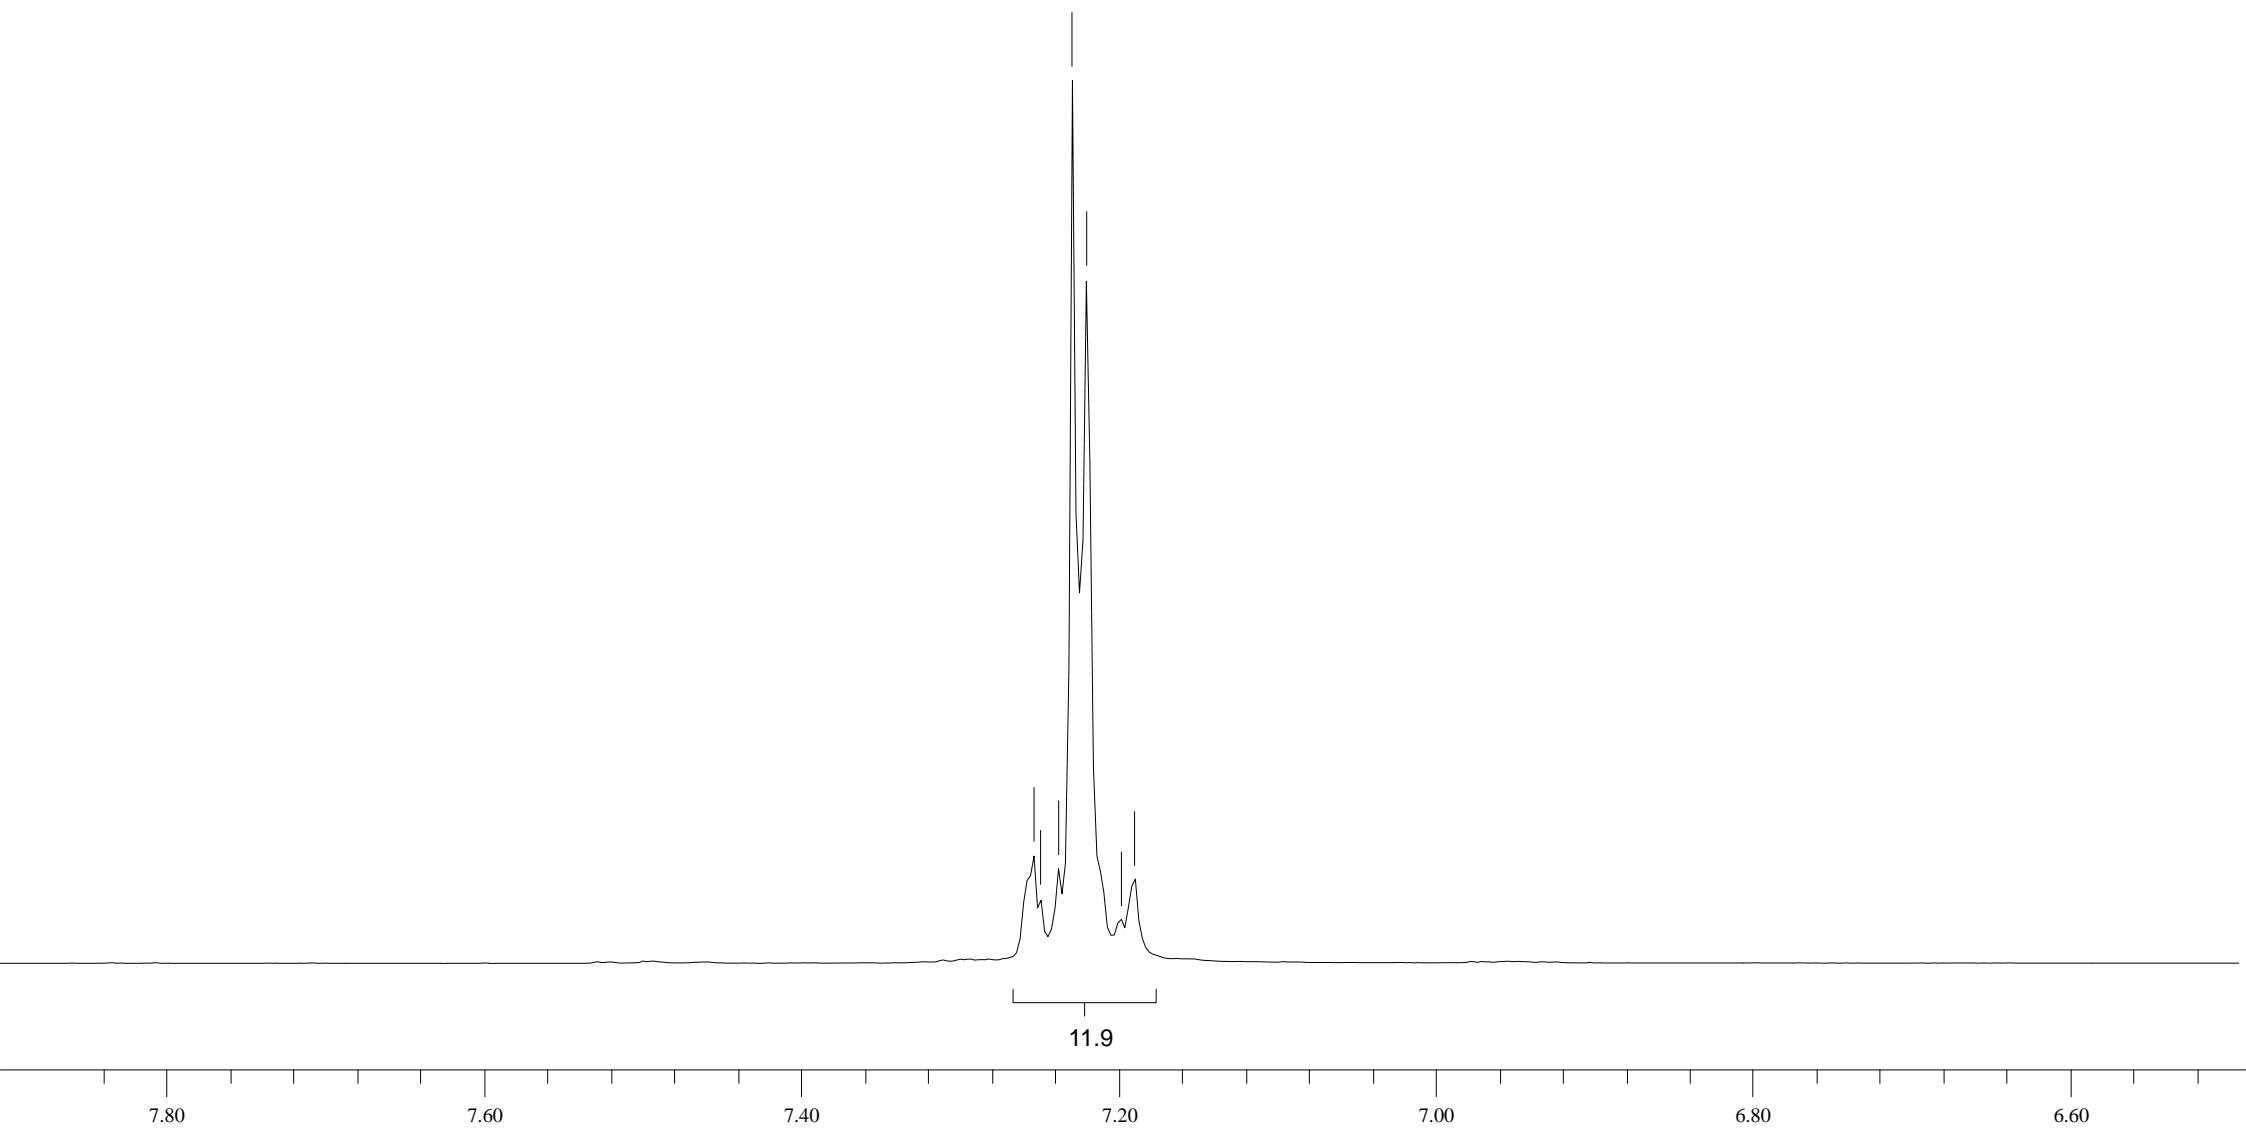



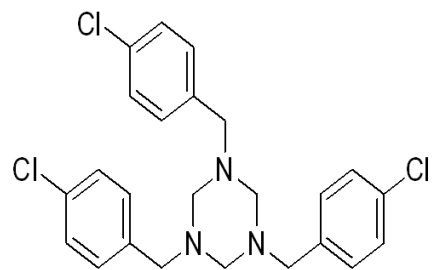

18

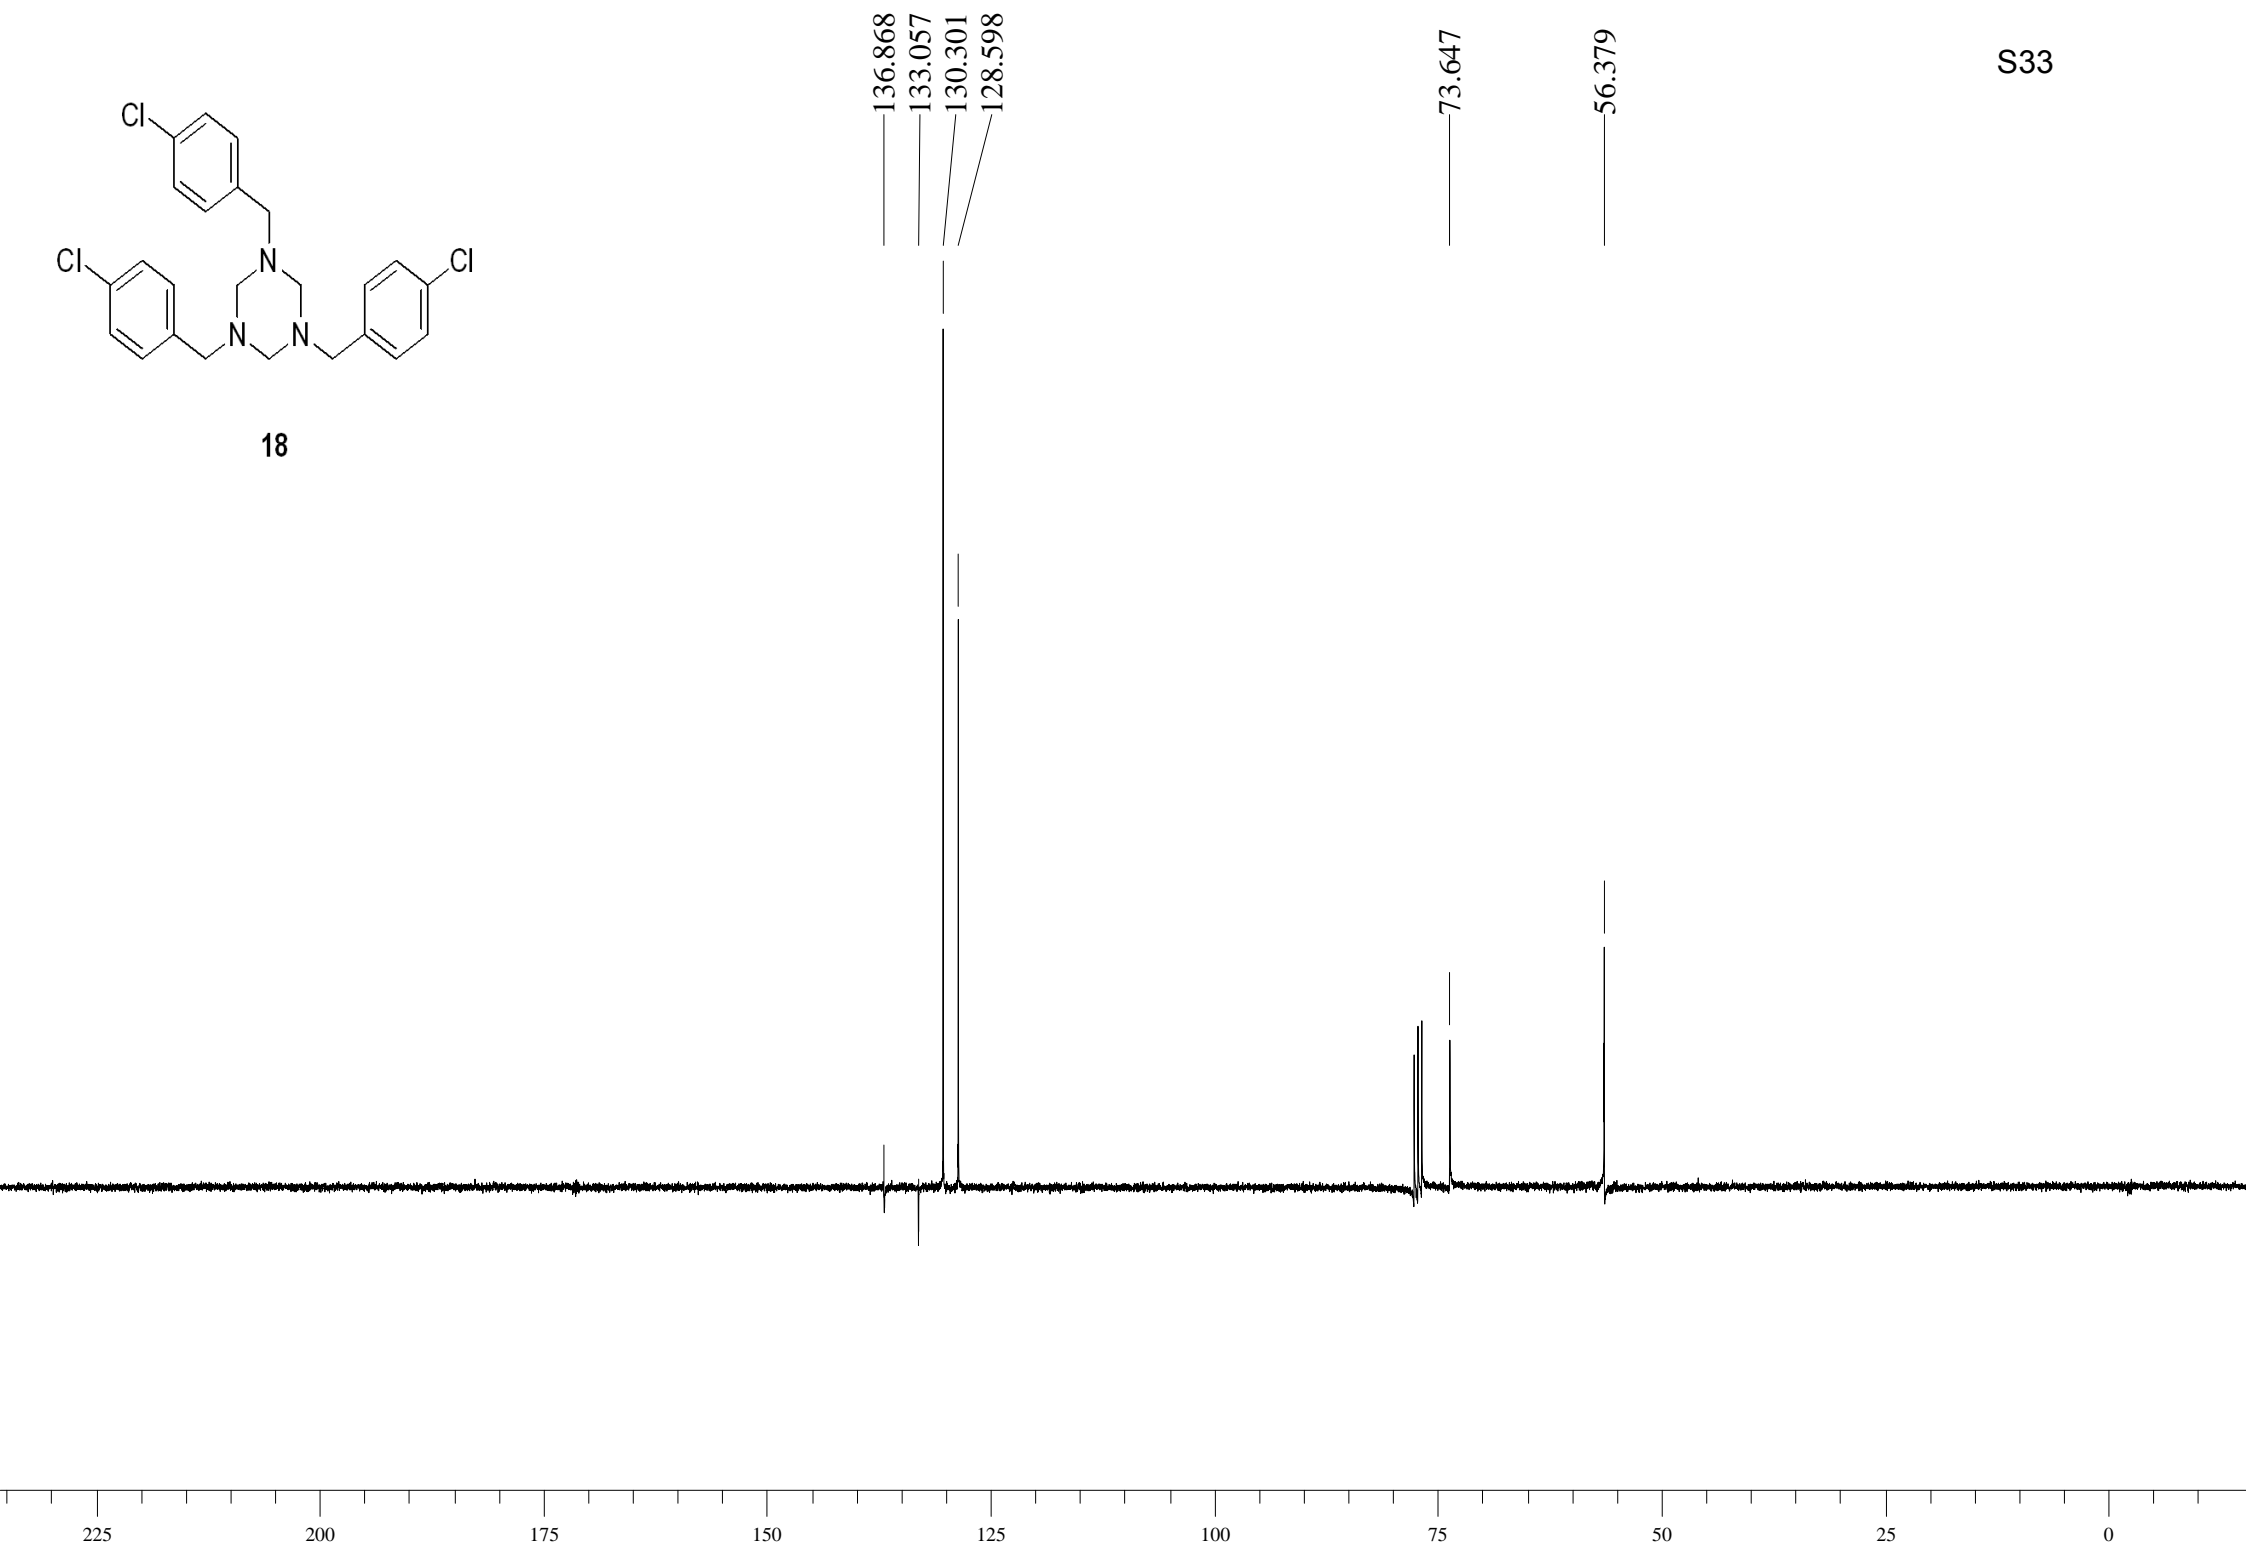

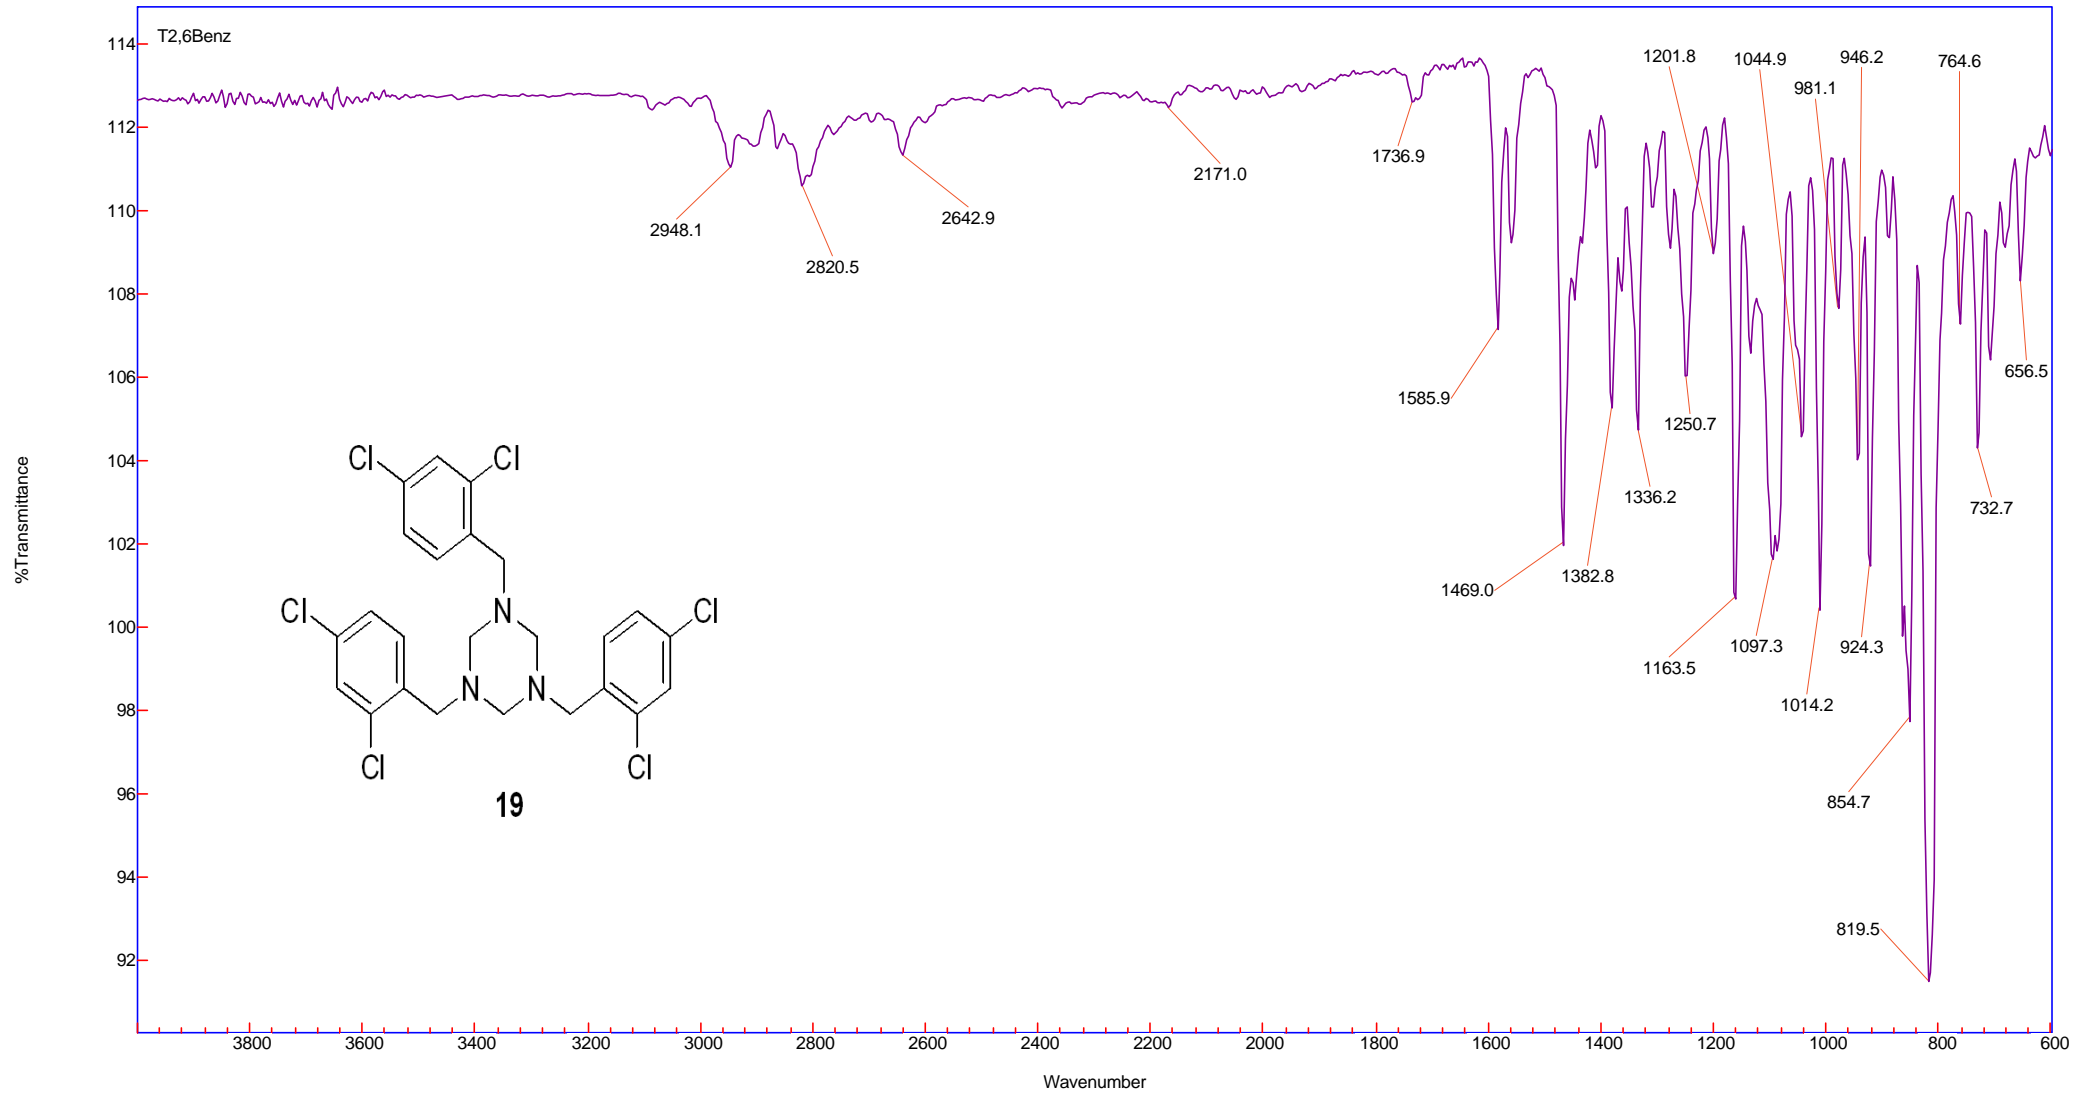

|          |  |
|----------|--|
| Name     |  |
| T2,6Benz |  |

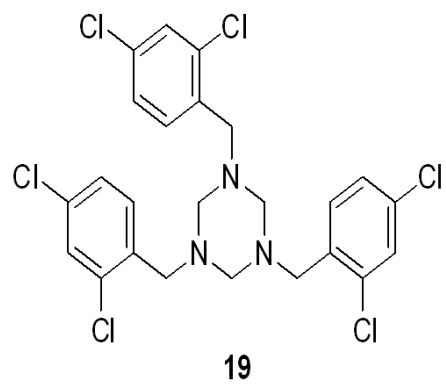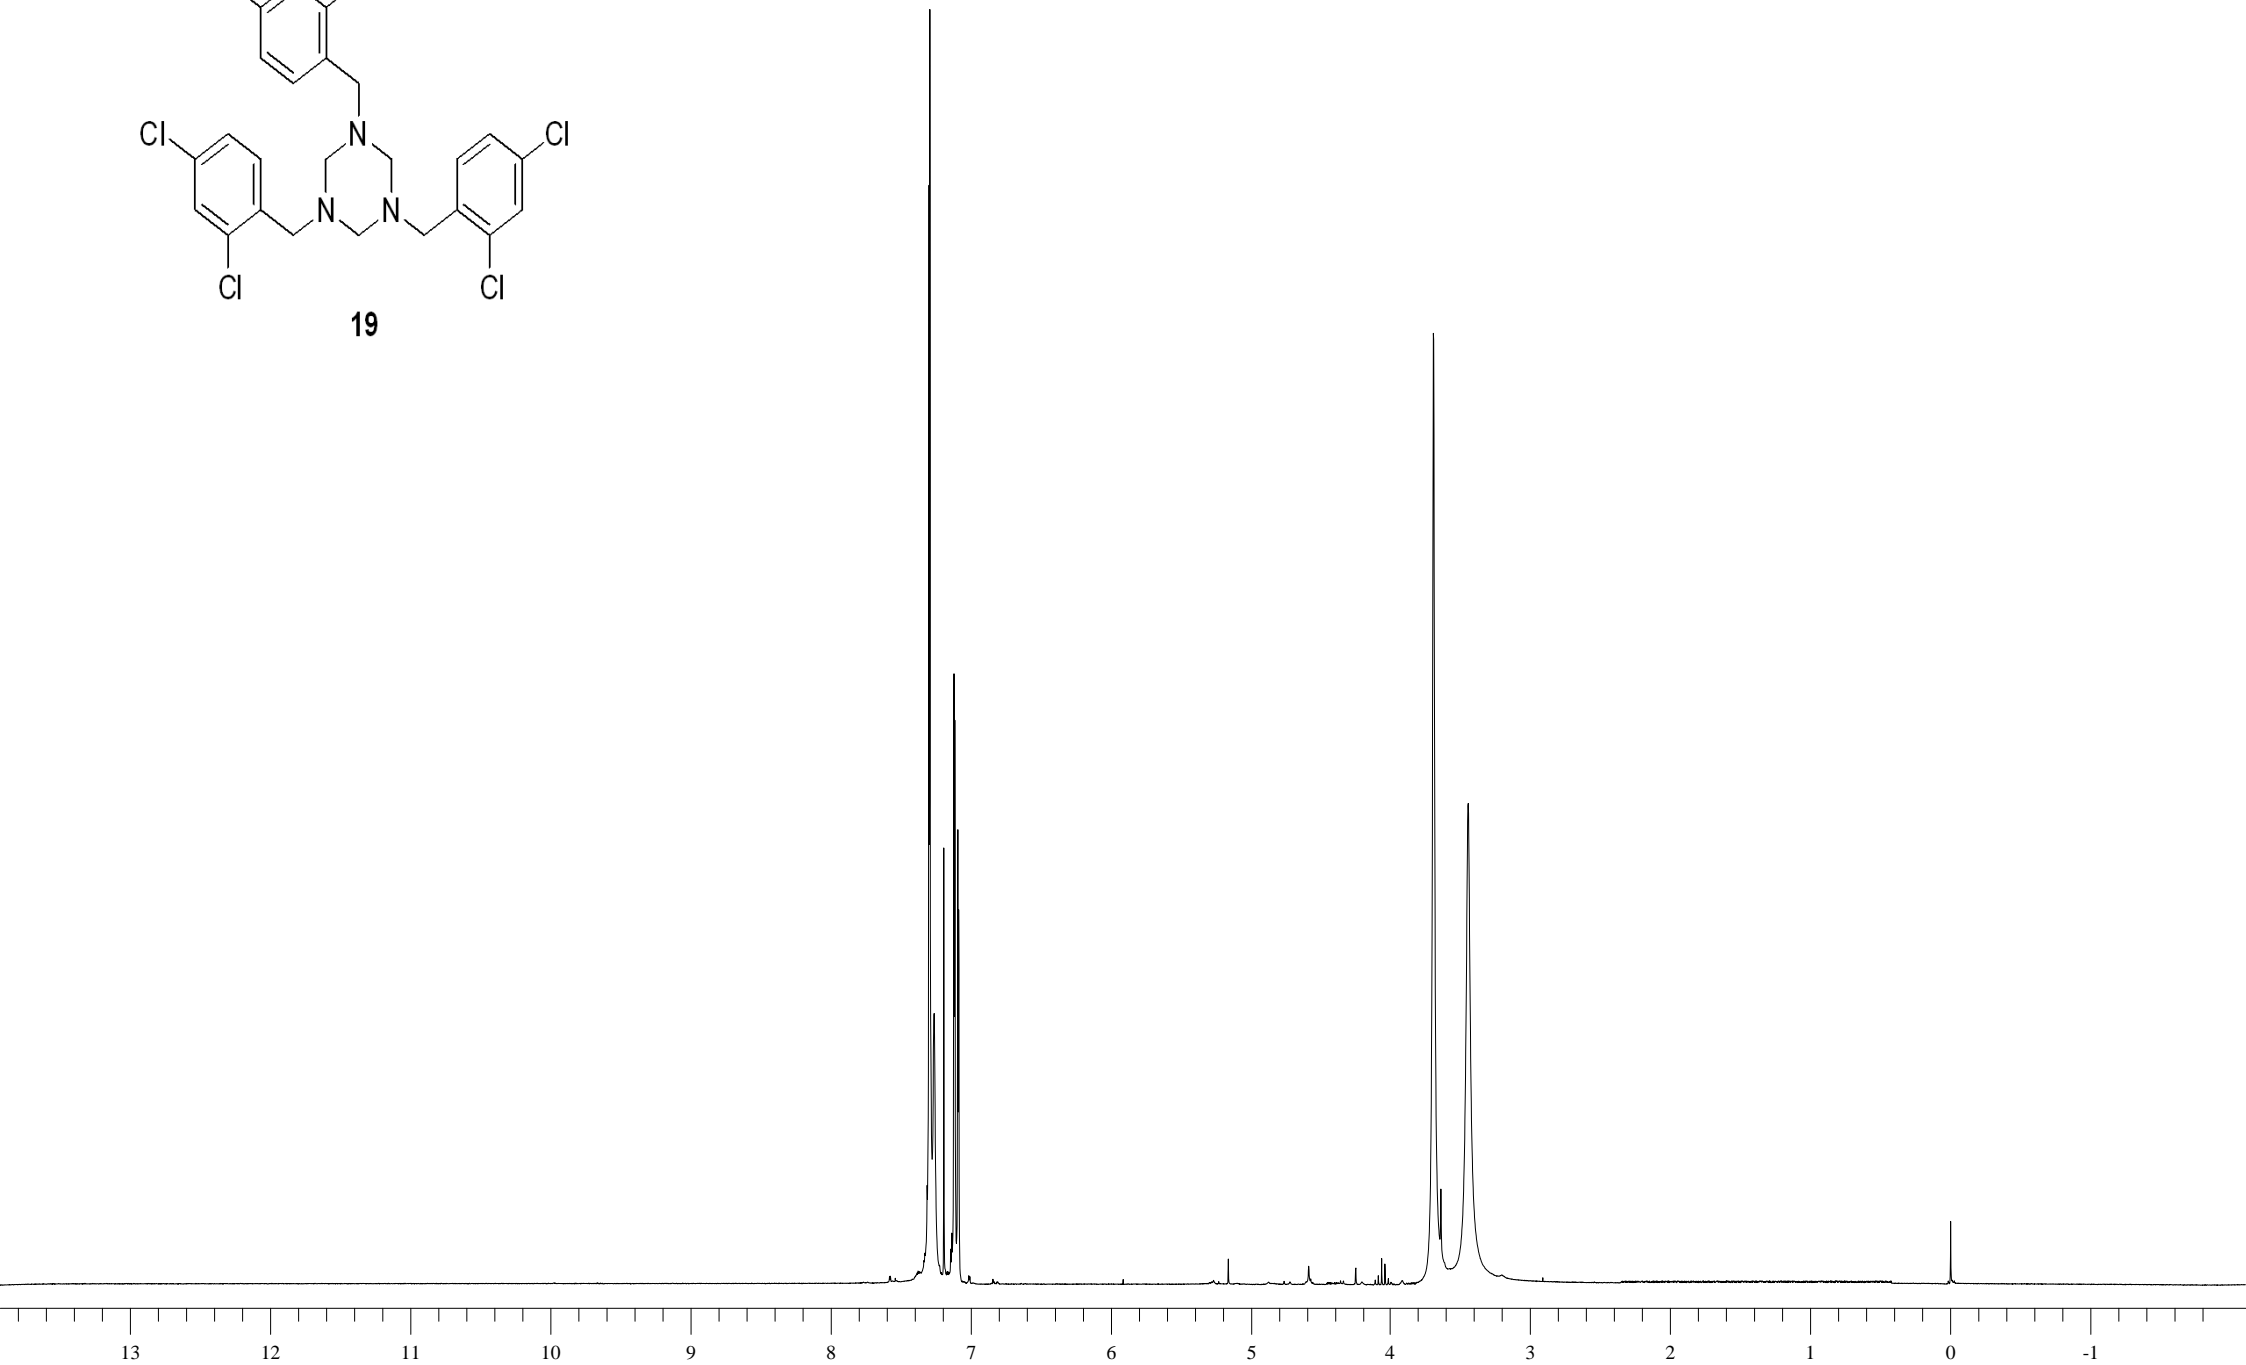

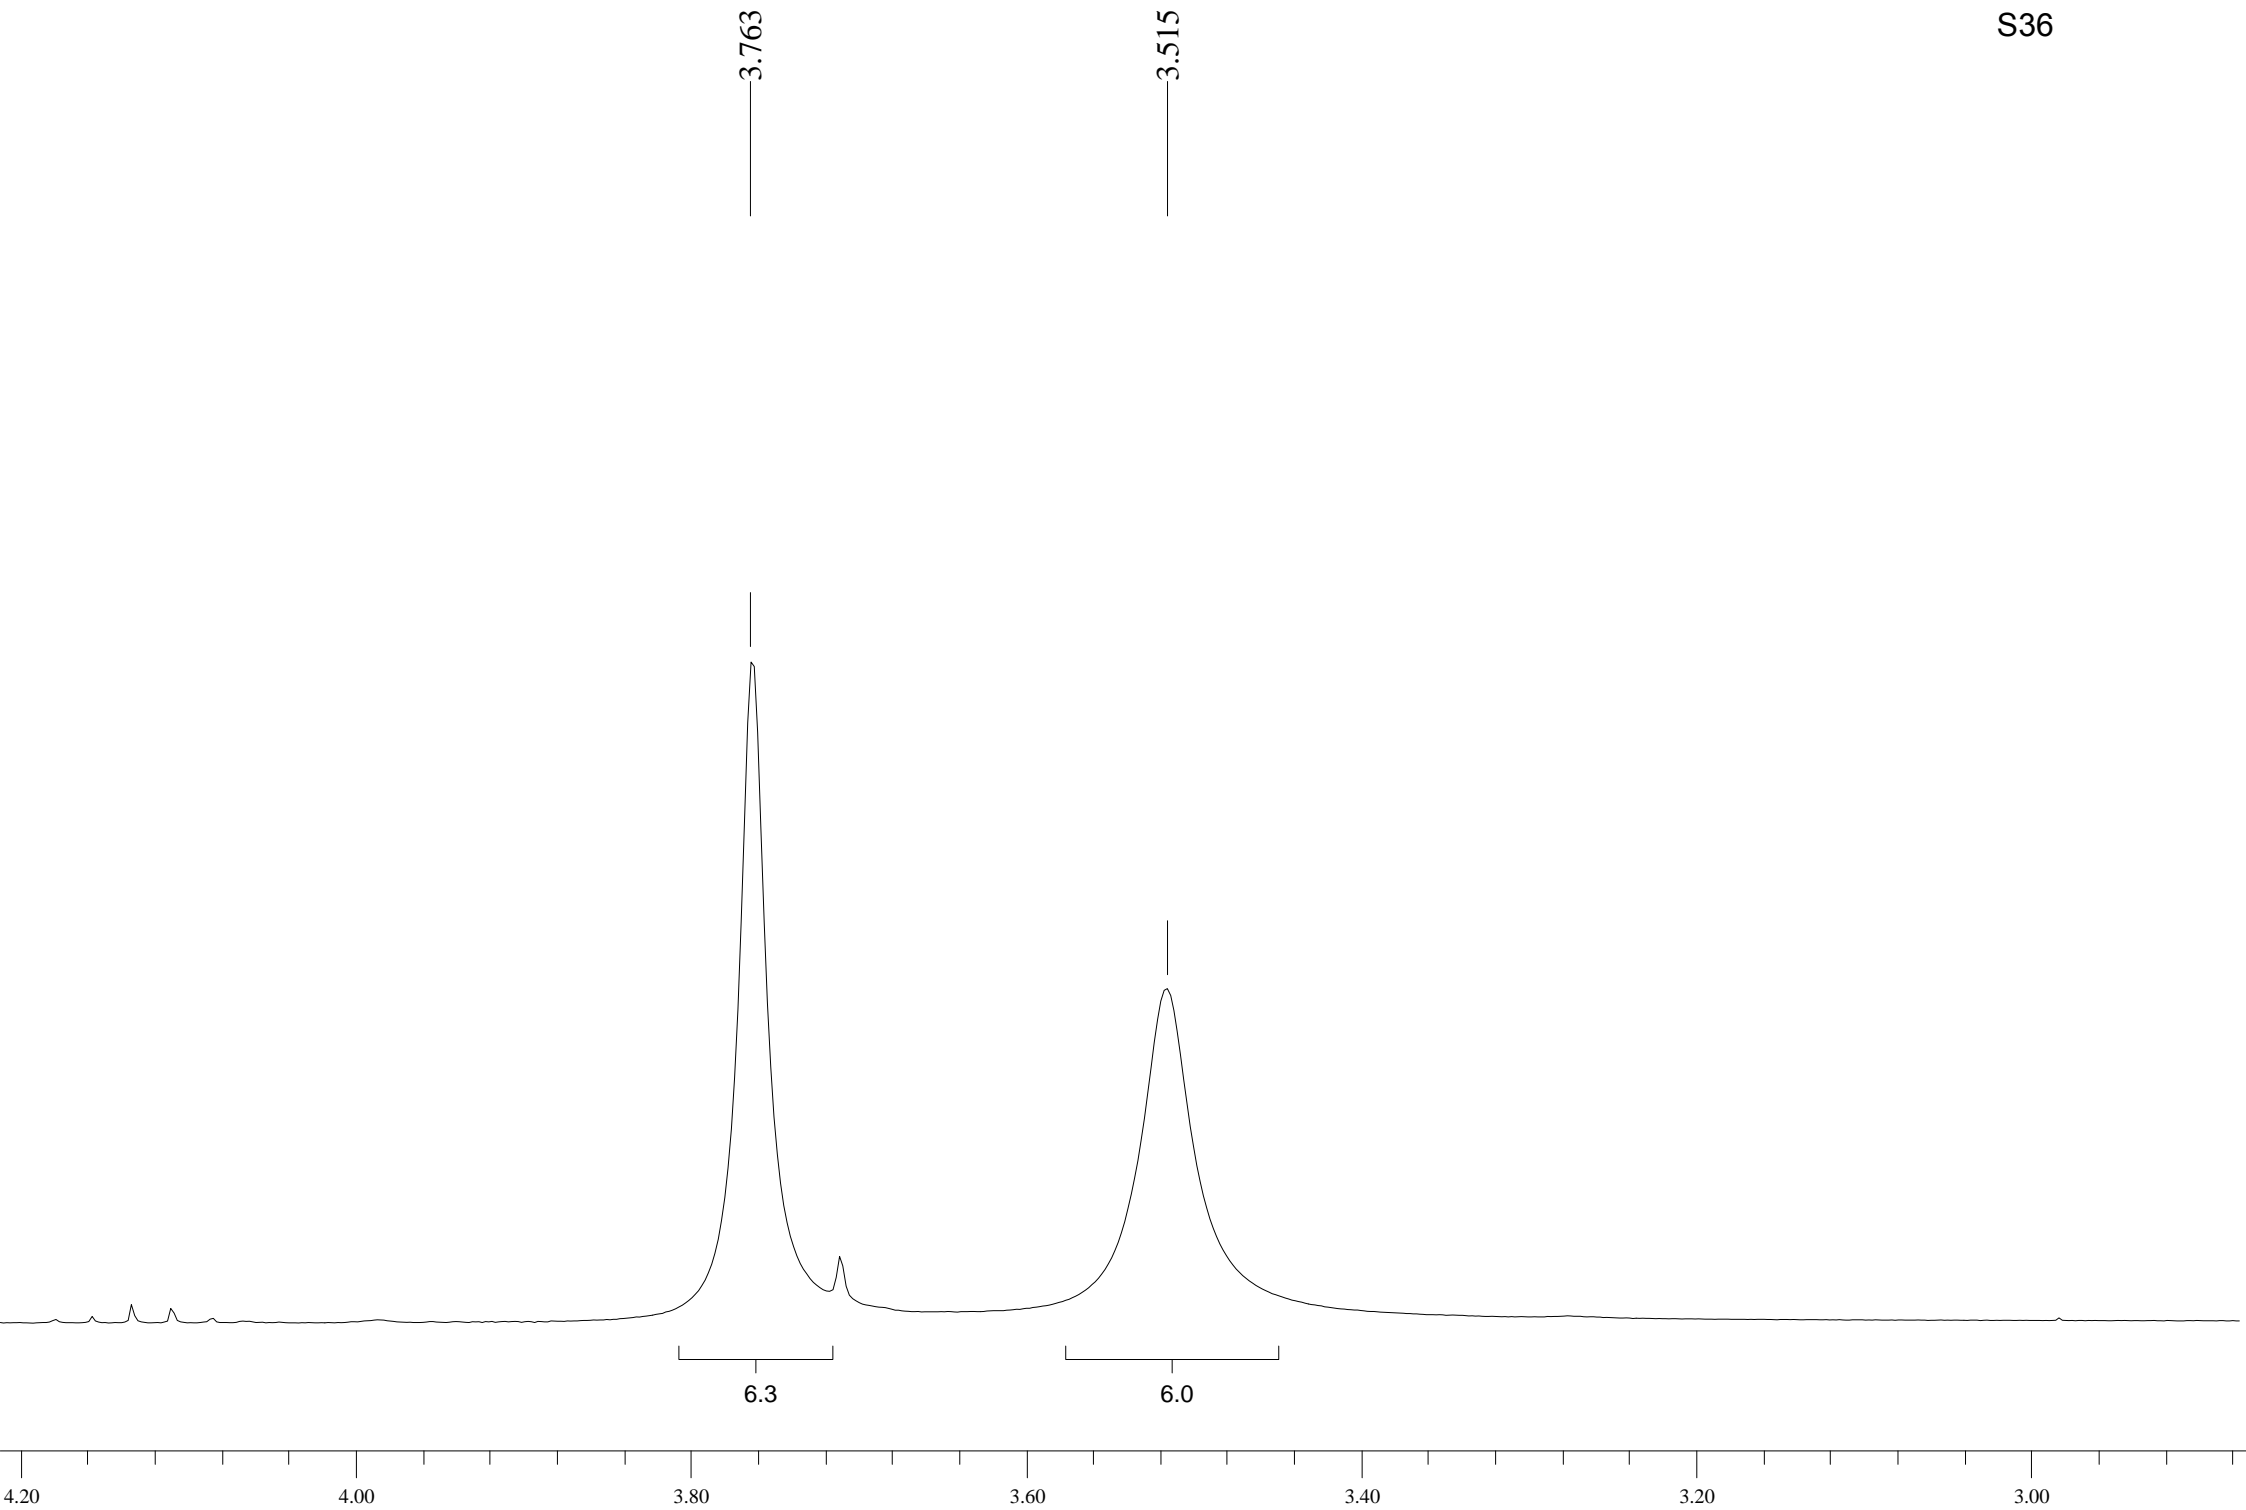

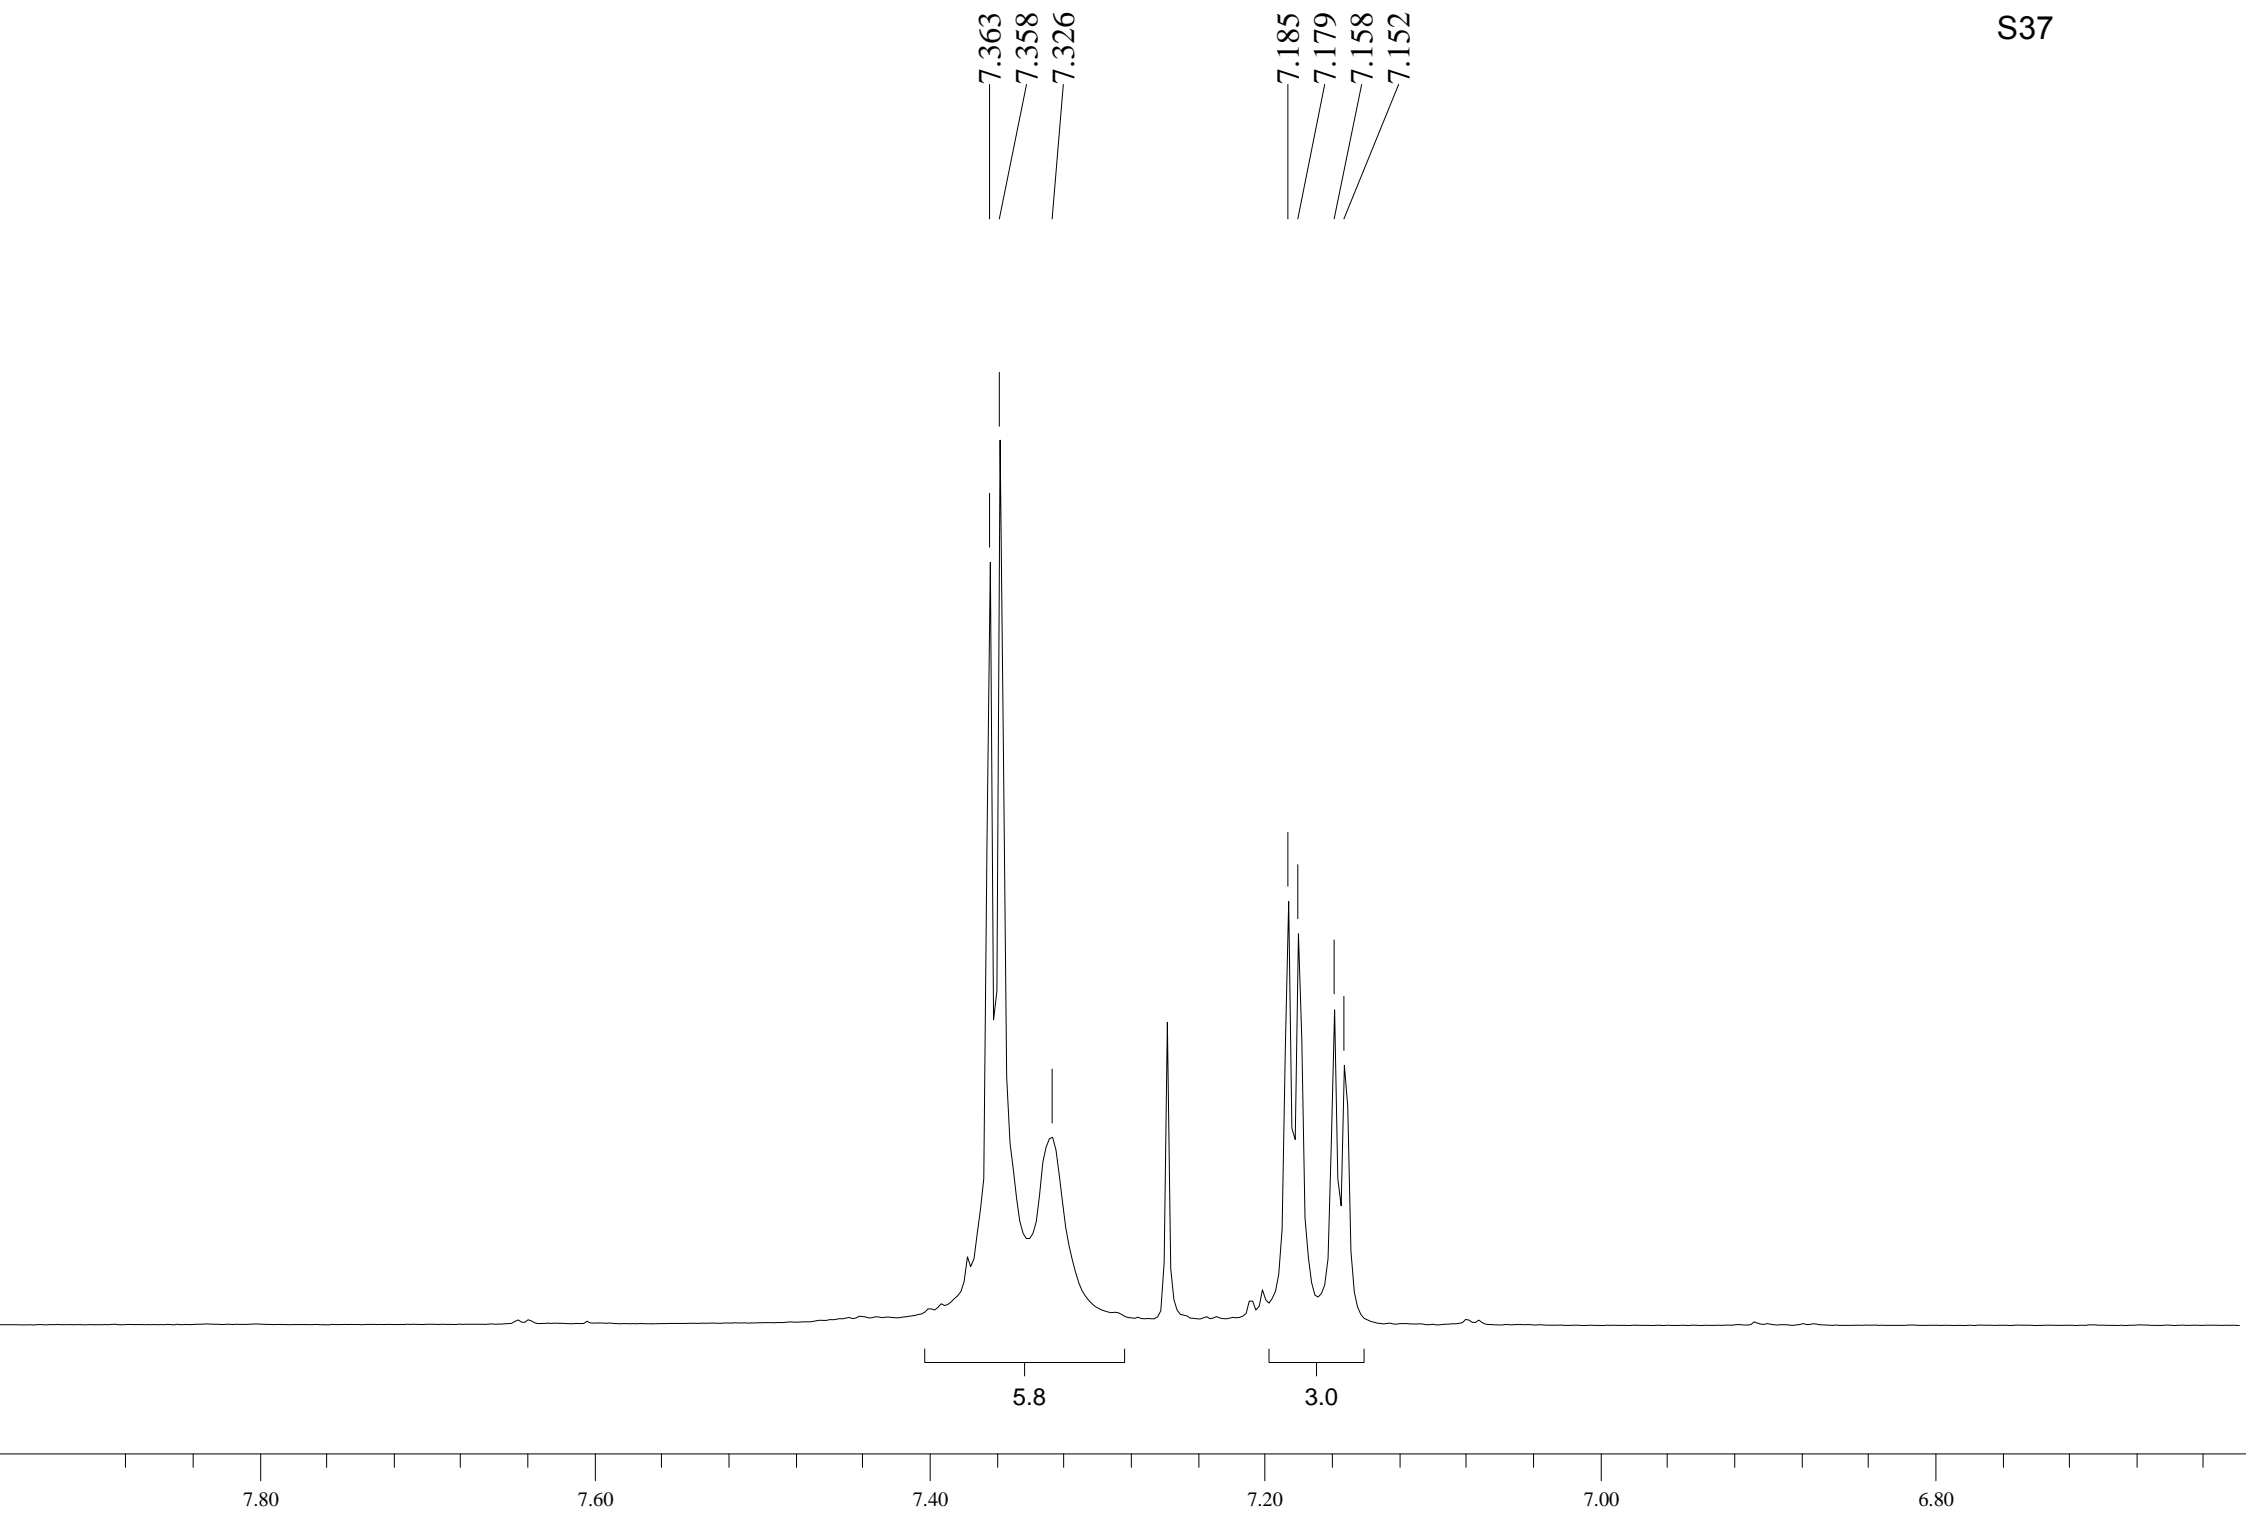



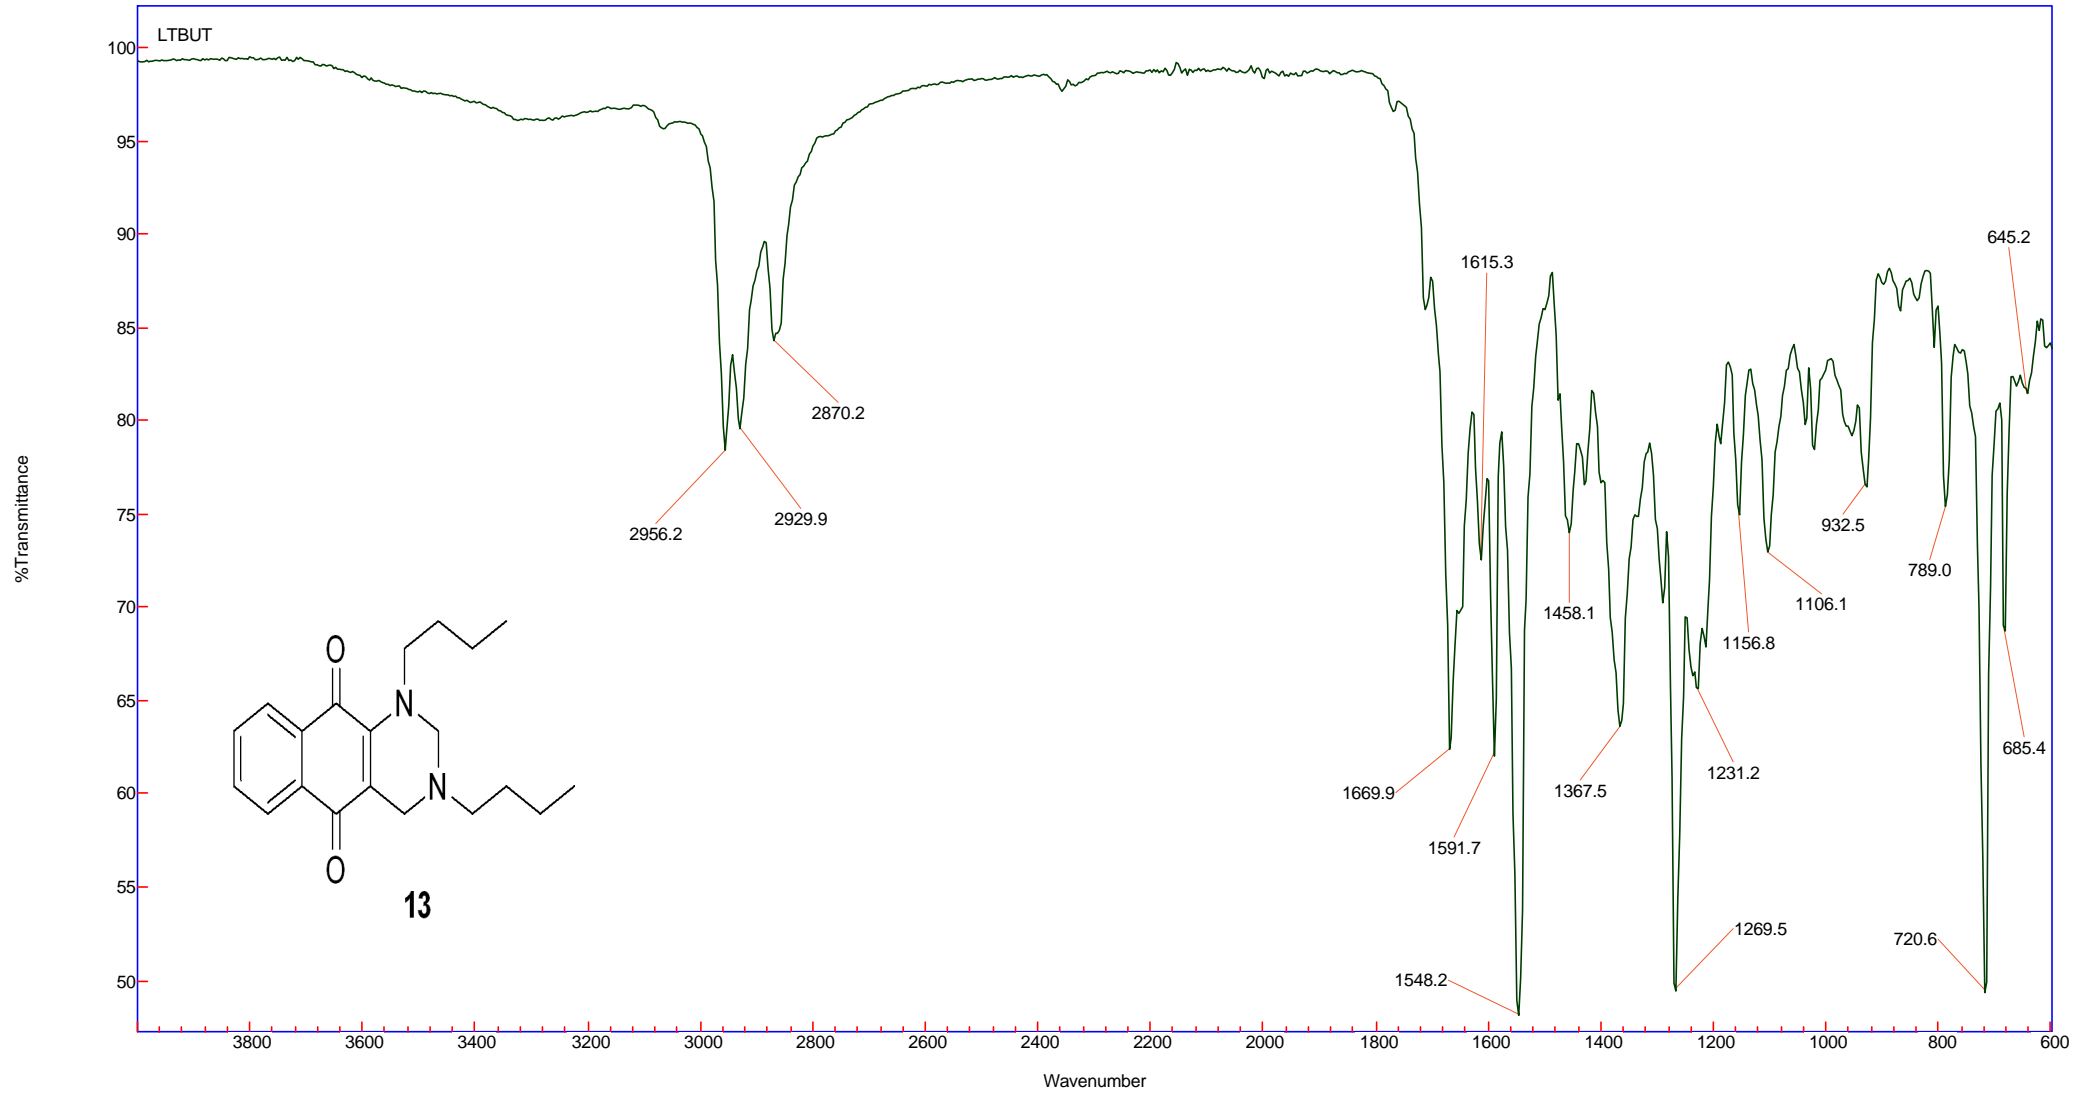

|       |   |
|-------|---|
| Name  |   |
| LTBUT | — |

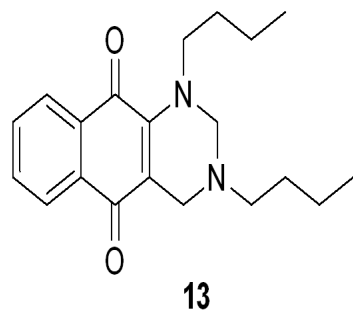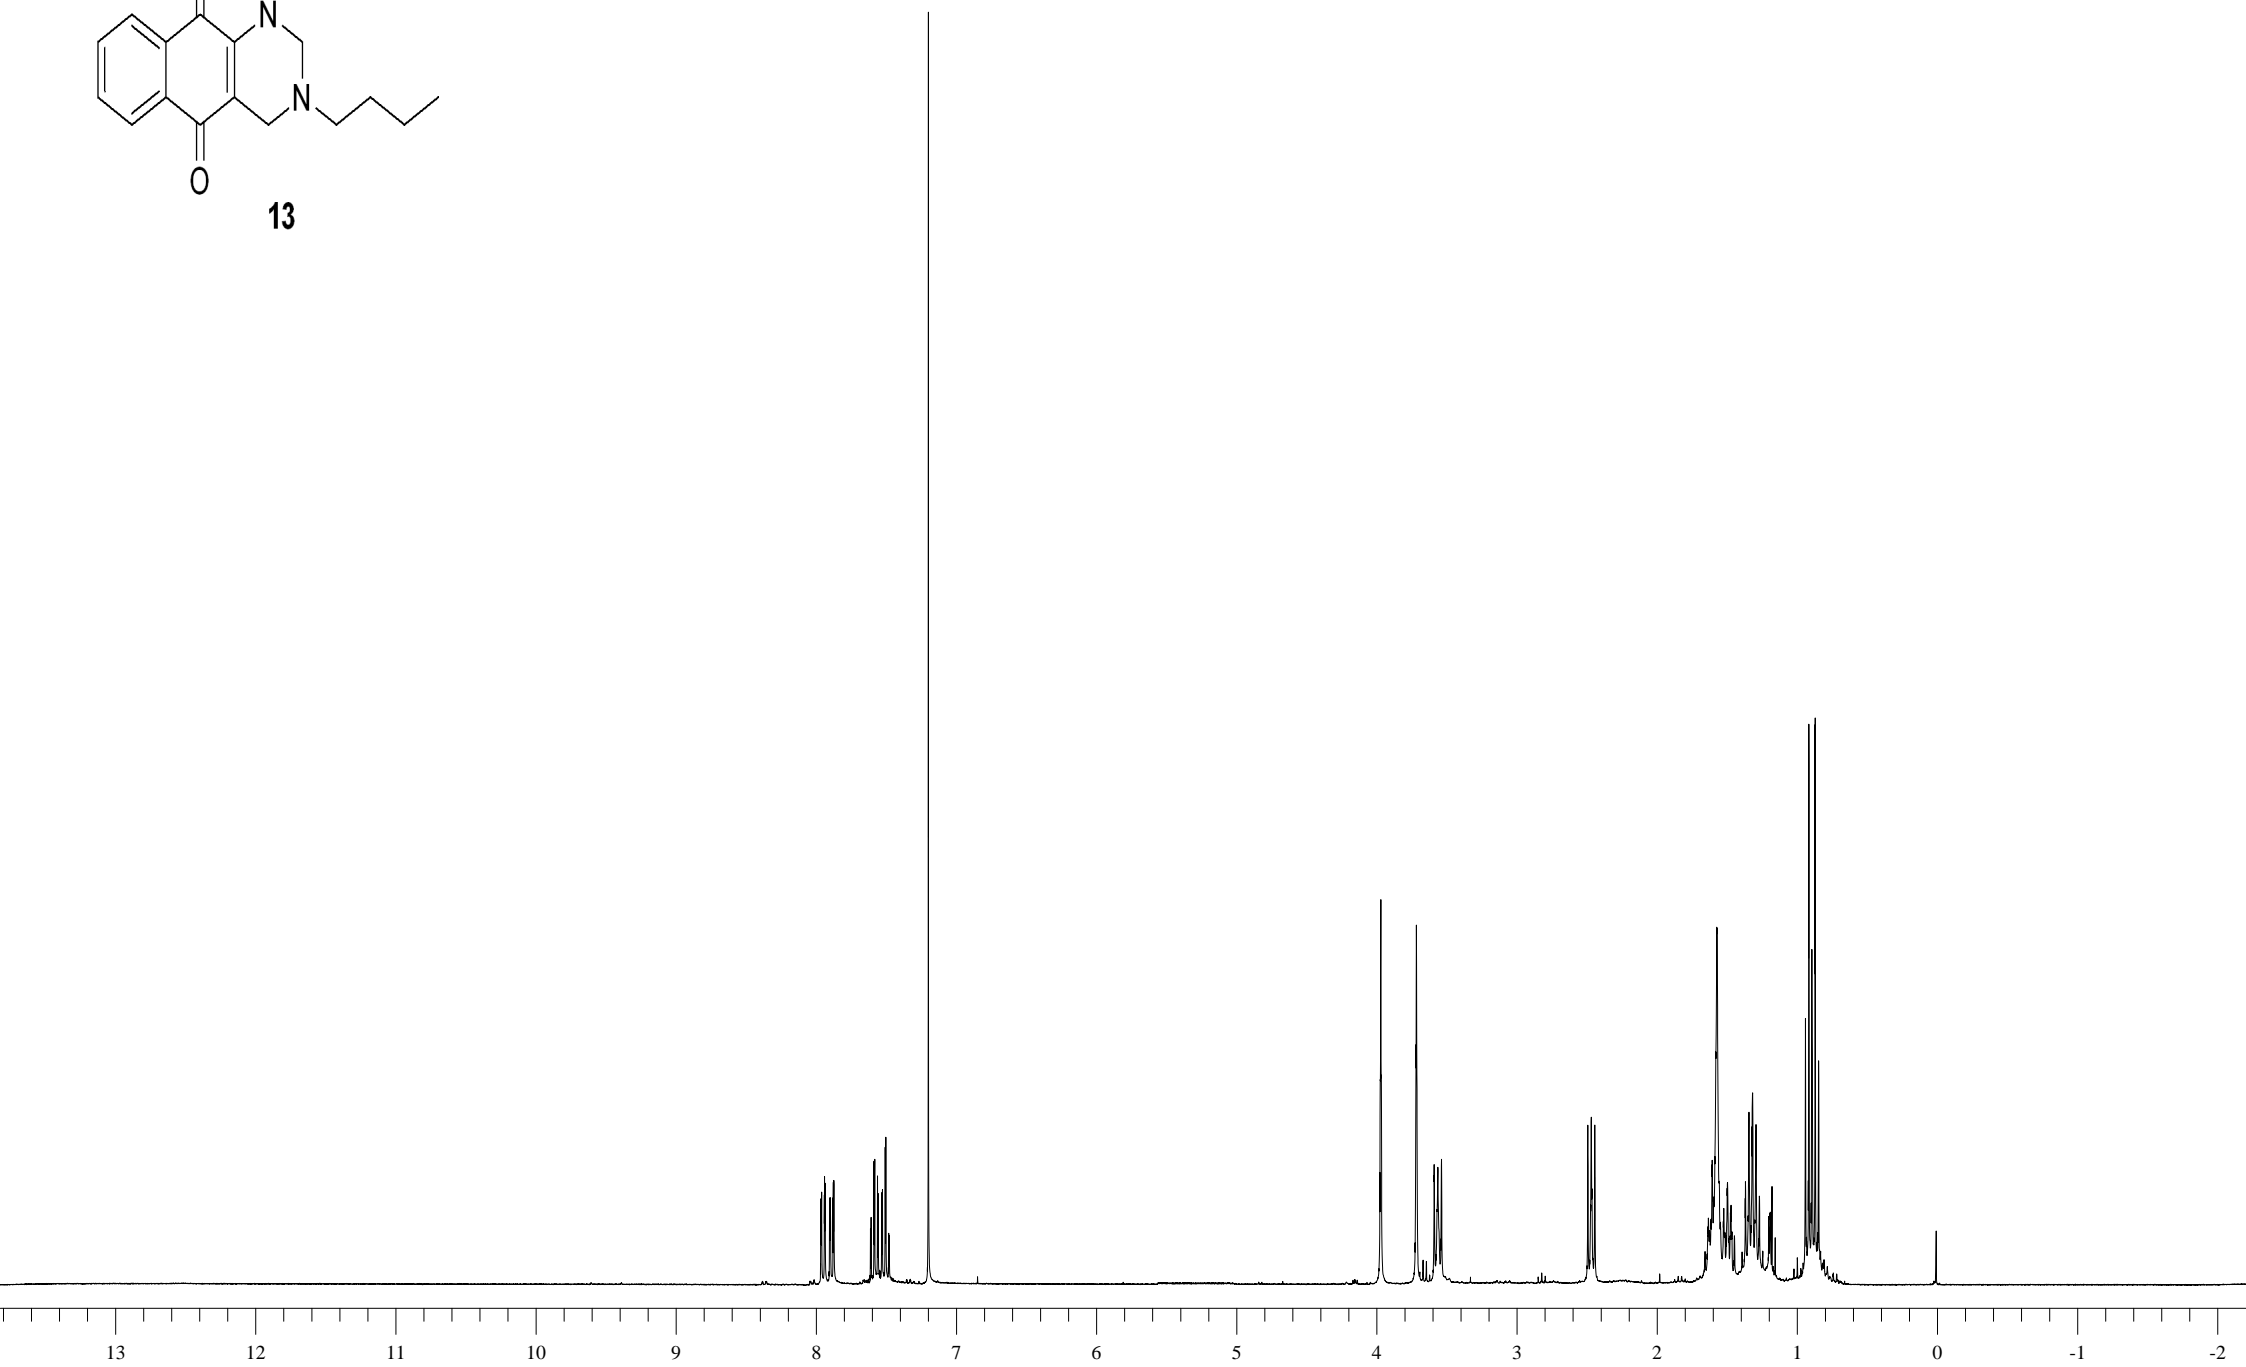



1.650  
1.625  
1.617  
1.607  
1.598  
1.588  
1.565  
1.540  
1.515  
1.507  
1.489  
1.468  
1.464  
1.440  
1.385  
1.361  
1.336  
1.309  
1.285  
1.262  
1.237

0.932  
0.908  
0.887  
0.884  
0.862  
0.839

S41

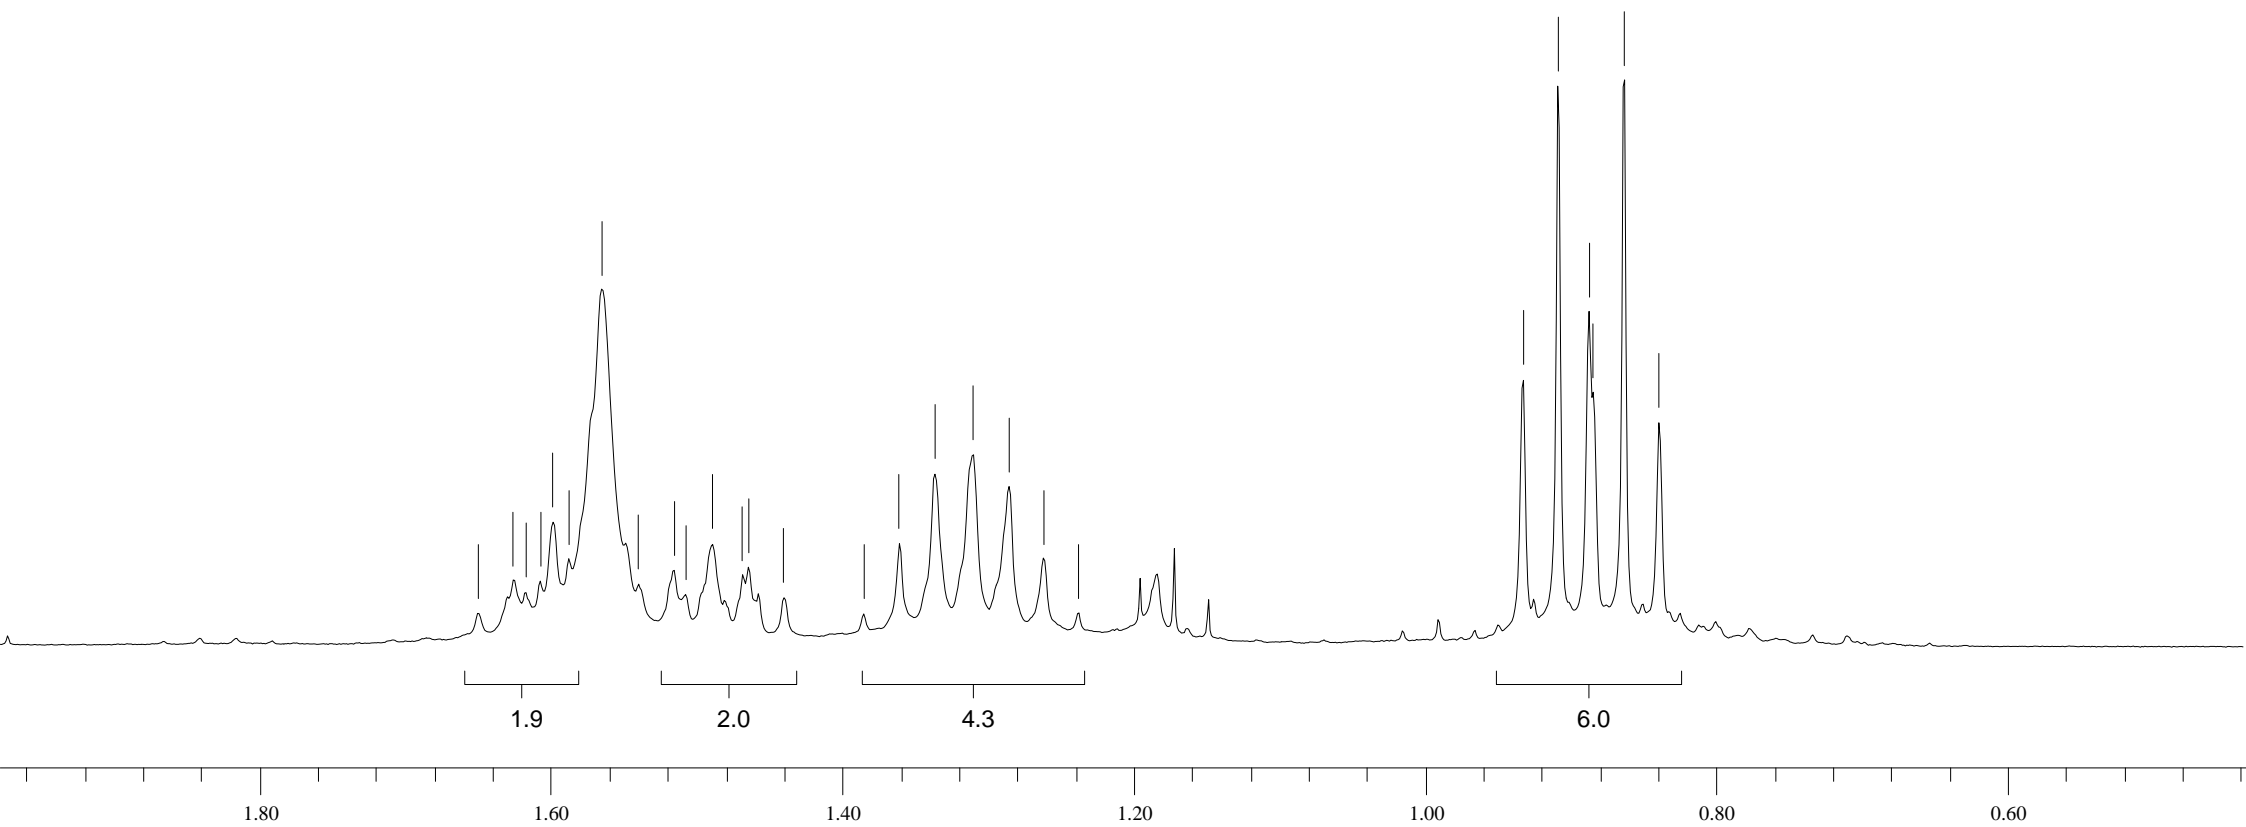

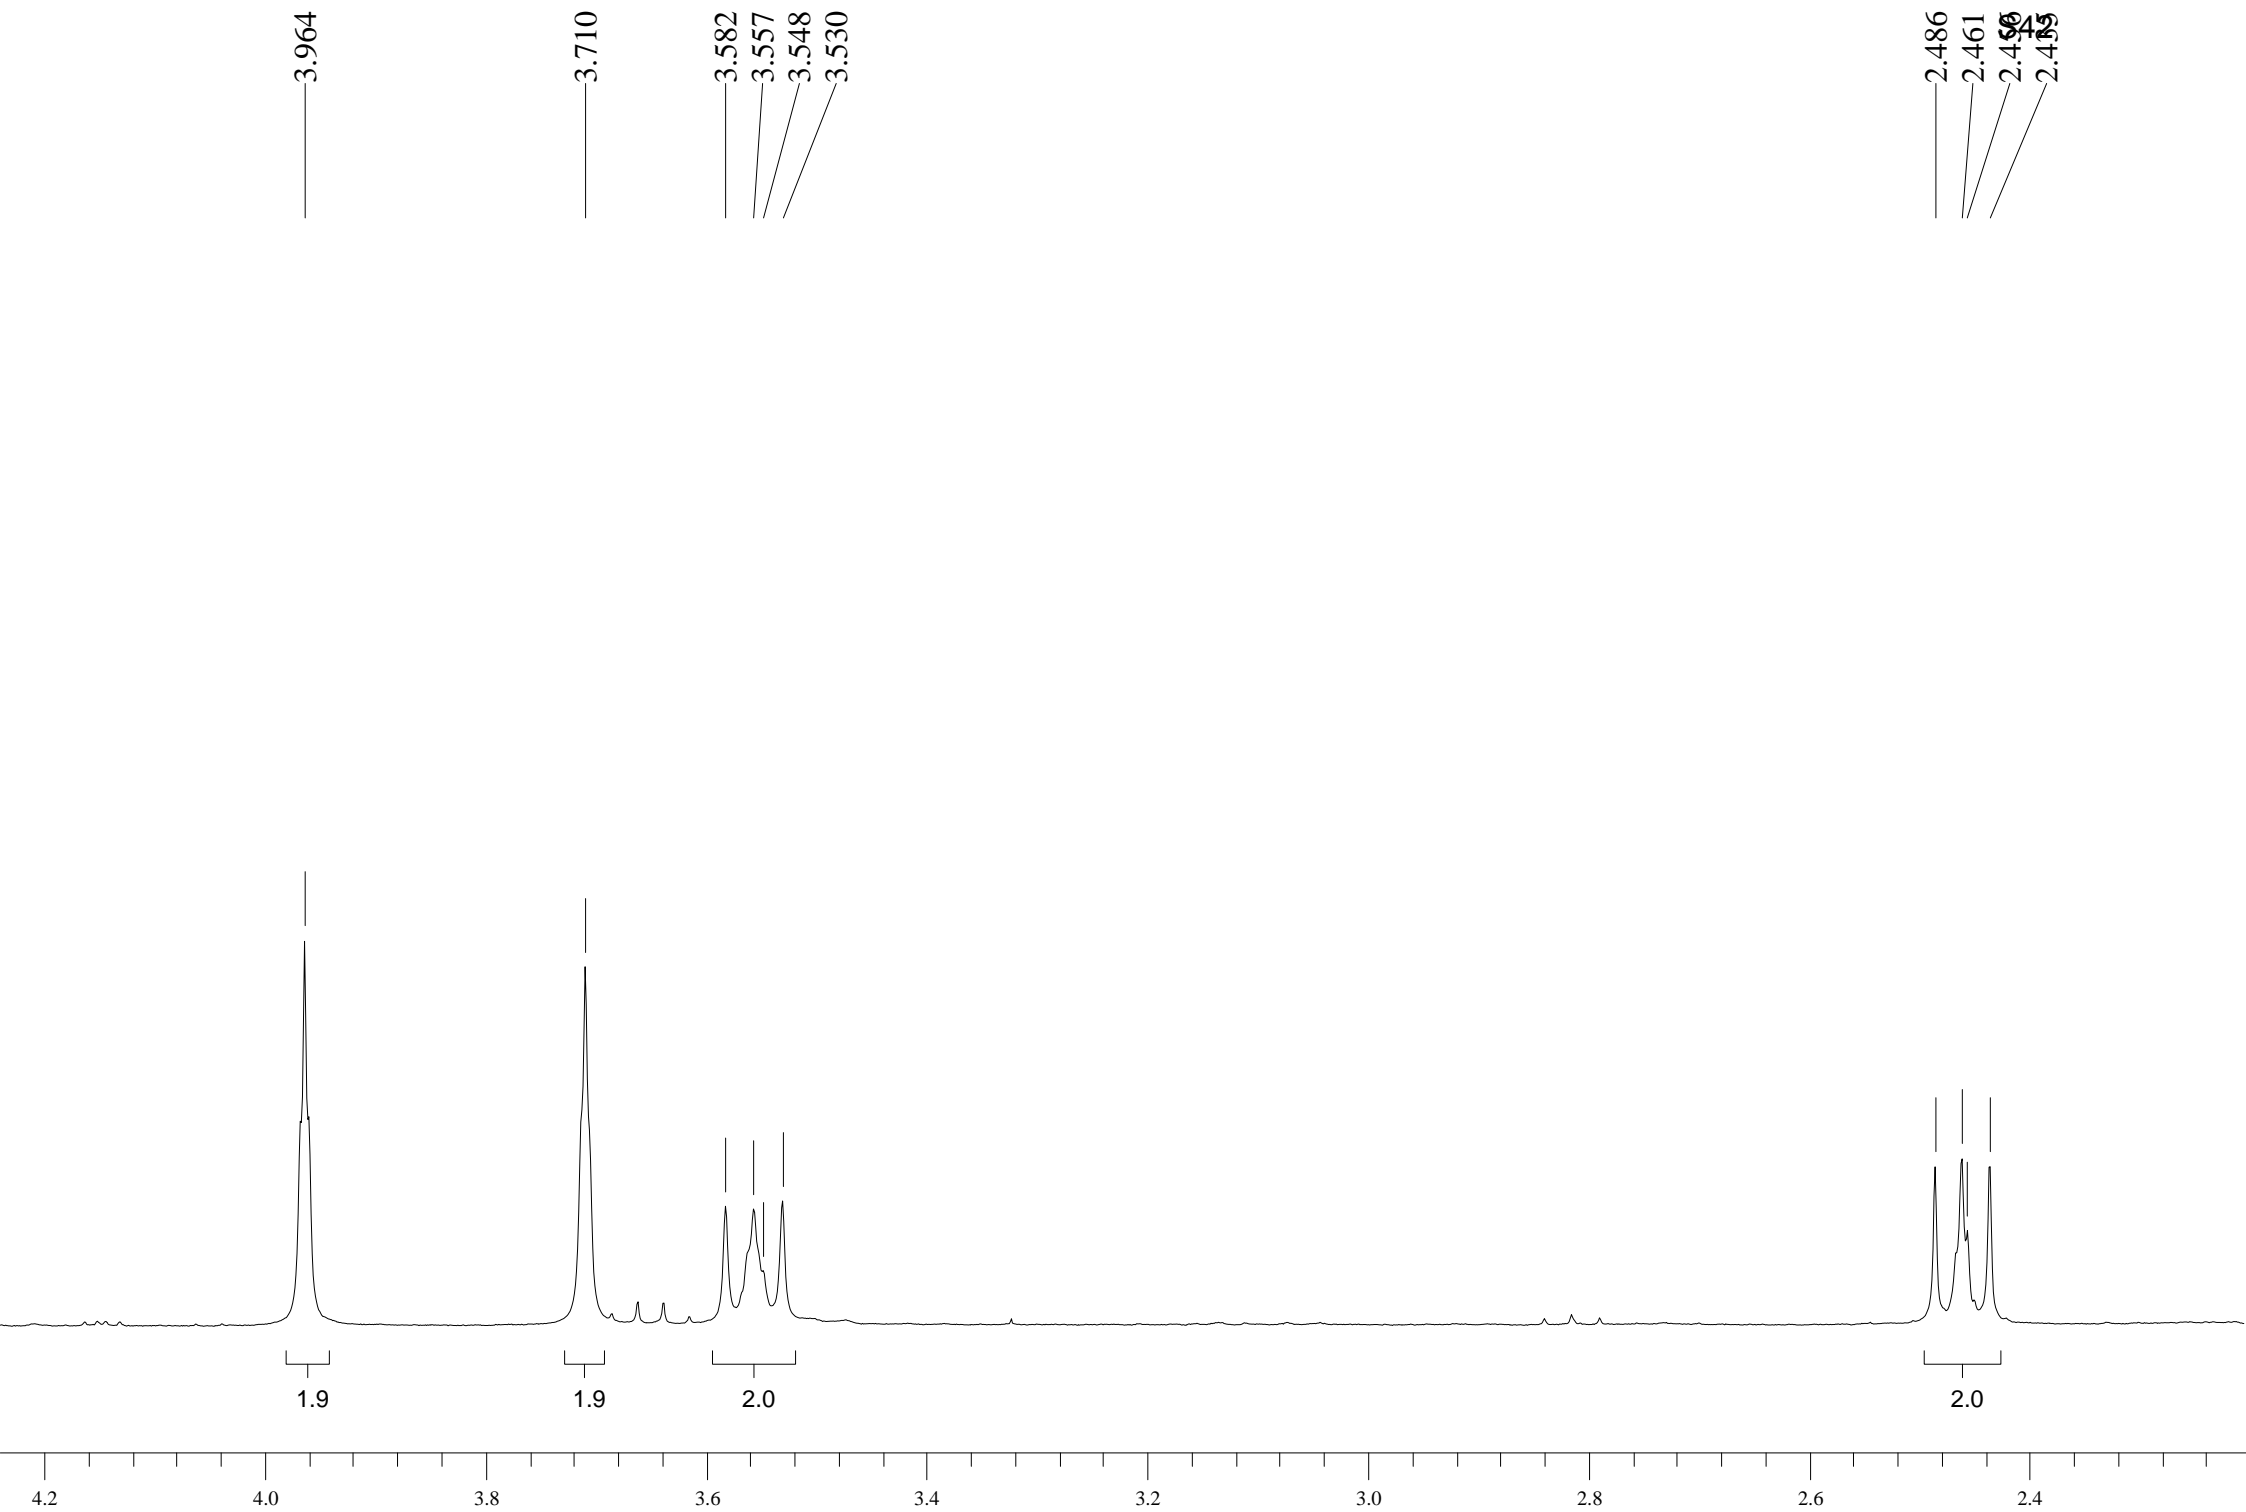

7.959  
7.954  
7.936  
7.934  
7.931  
7.929  
7.897  
7.894  
7.892  
7.871  
7.868  
7.866

7.606  
7.601  
7.580  
7.576  
7.556  
7.551  
7.527  
7.521  
7.501  
7.497  
7.476  
7.472

S43

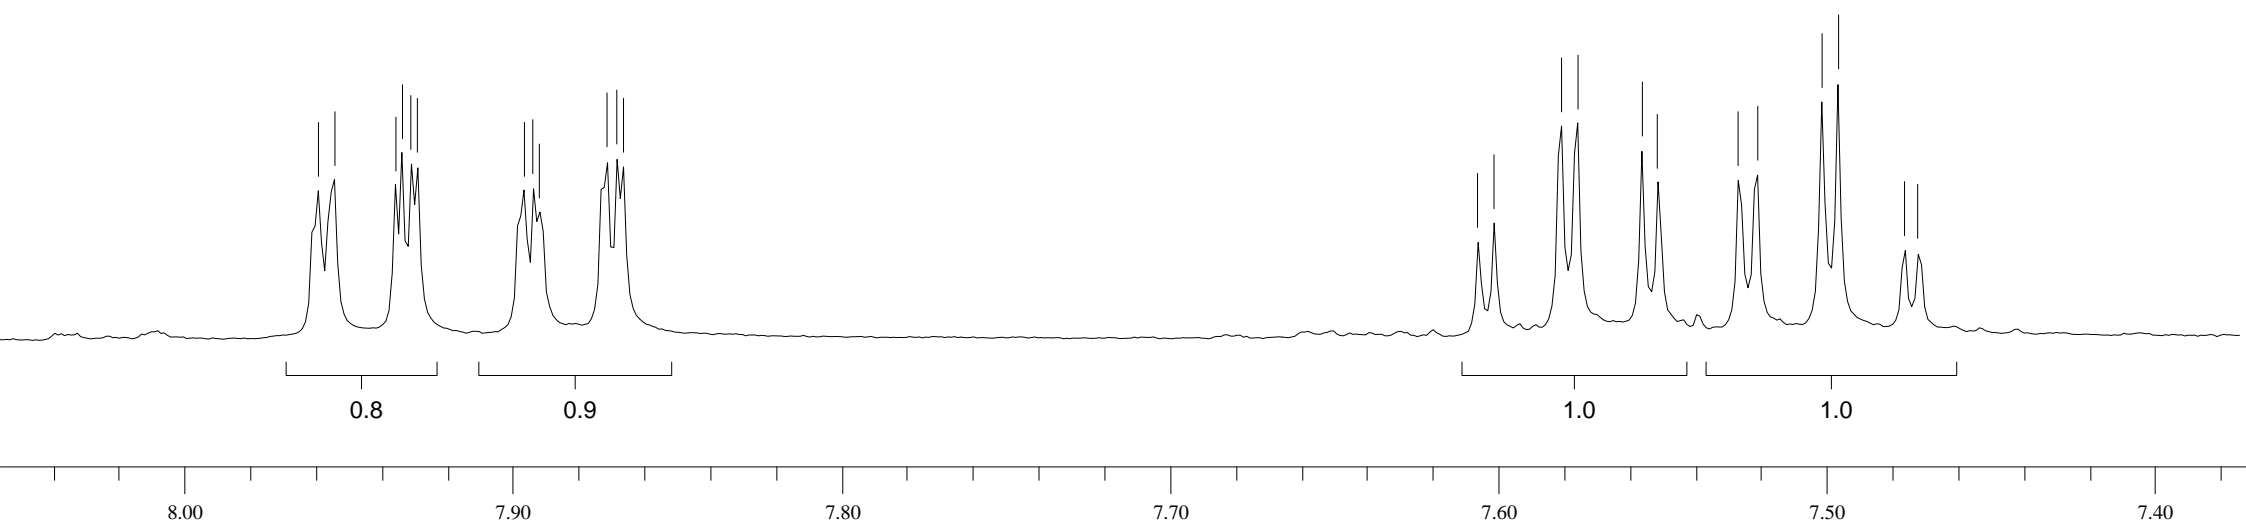

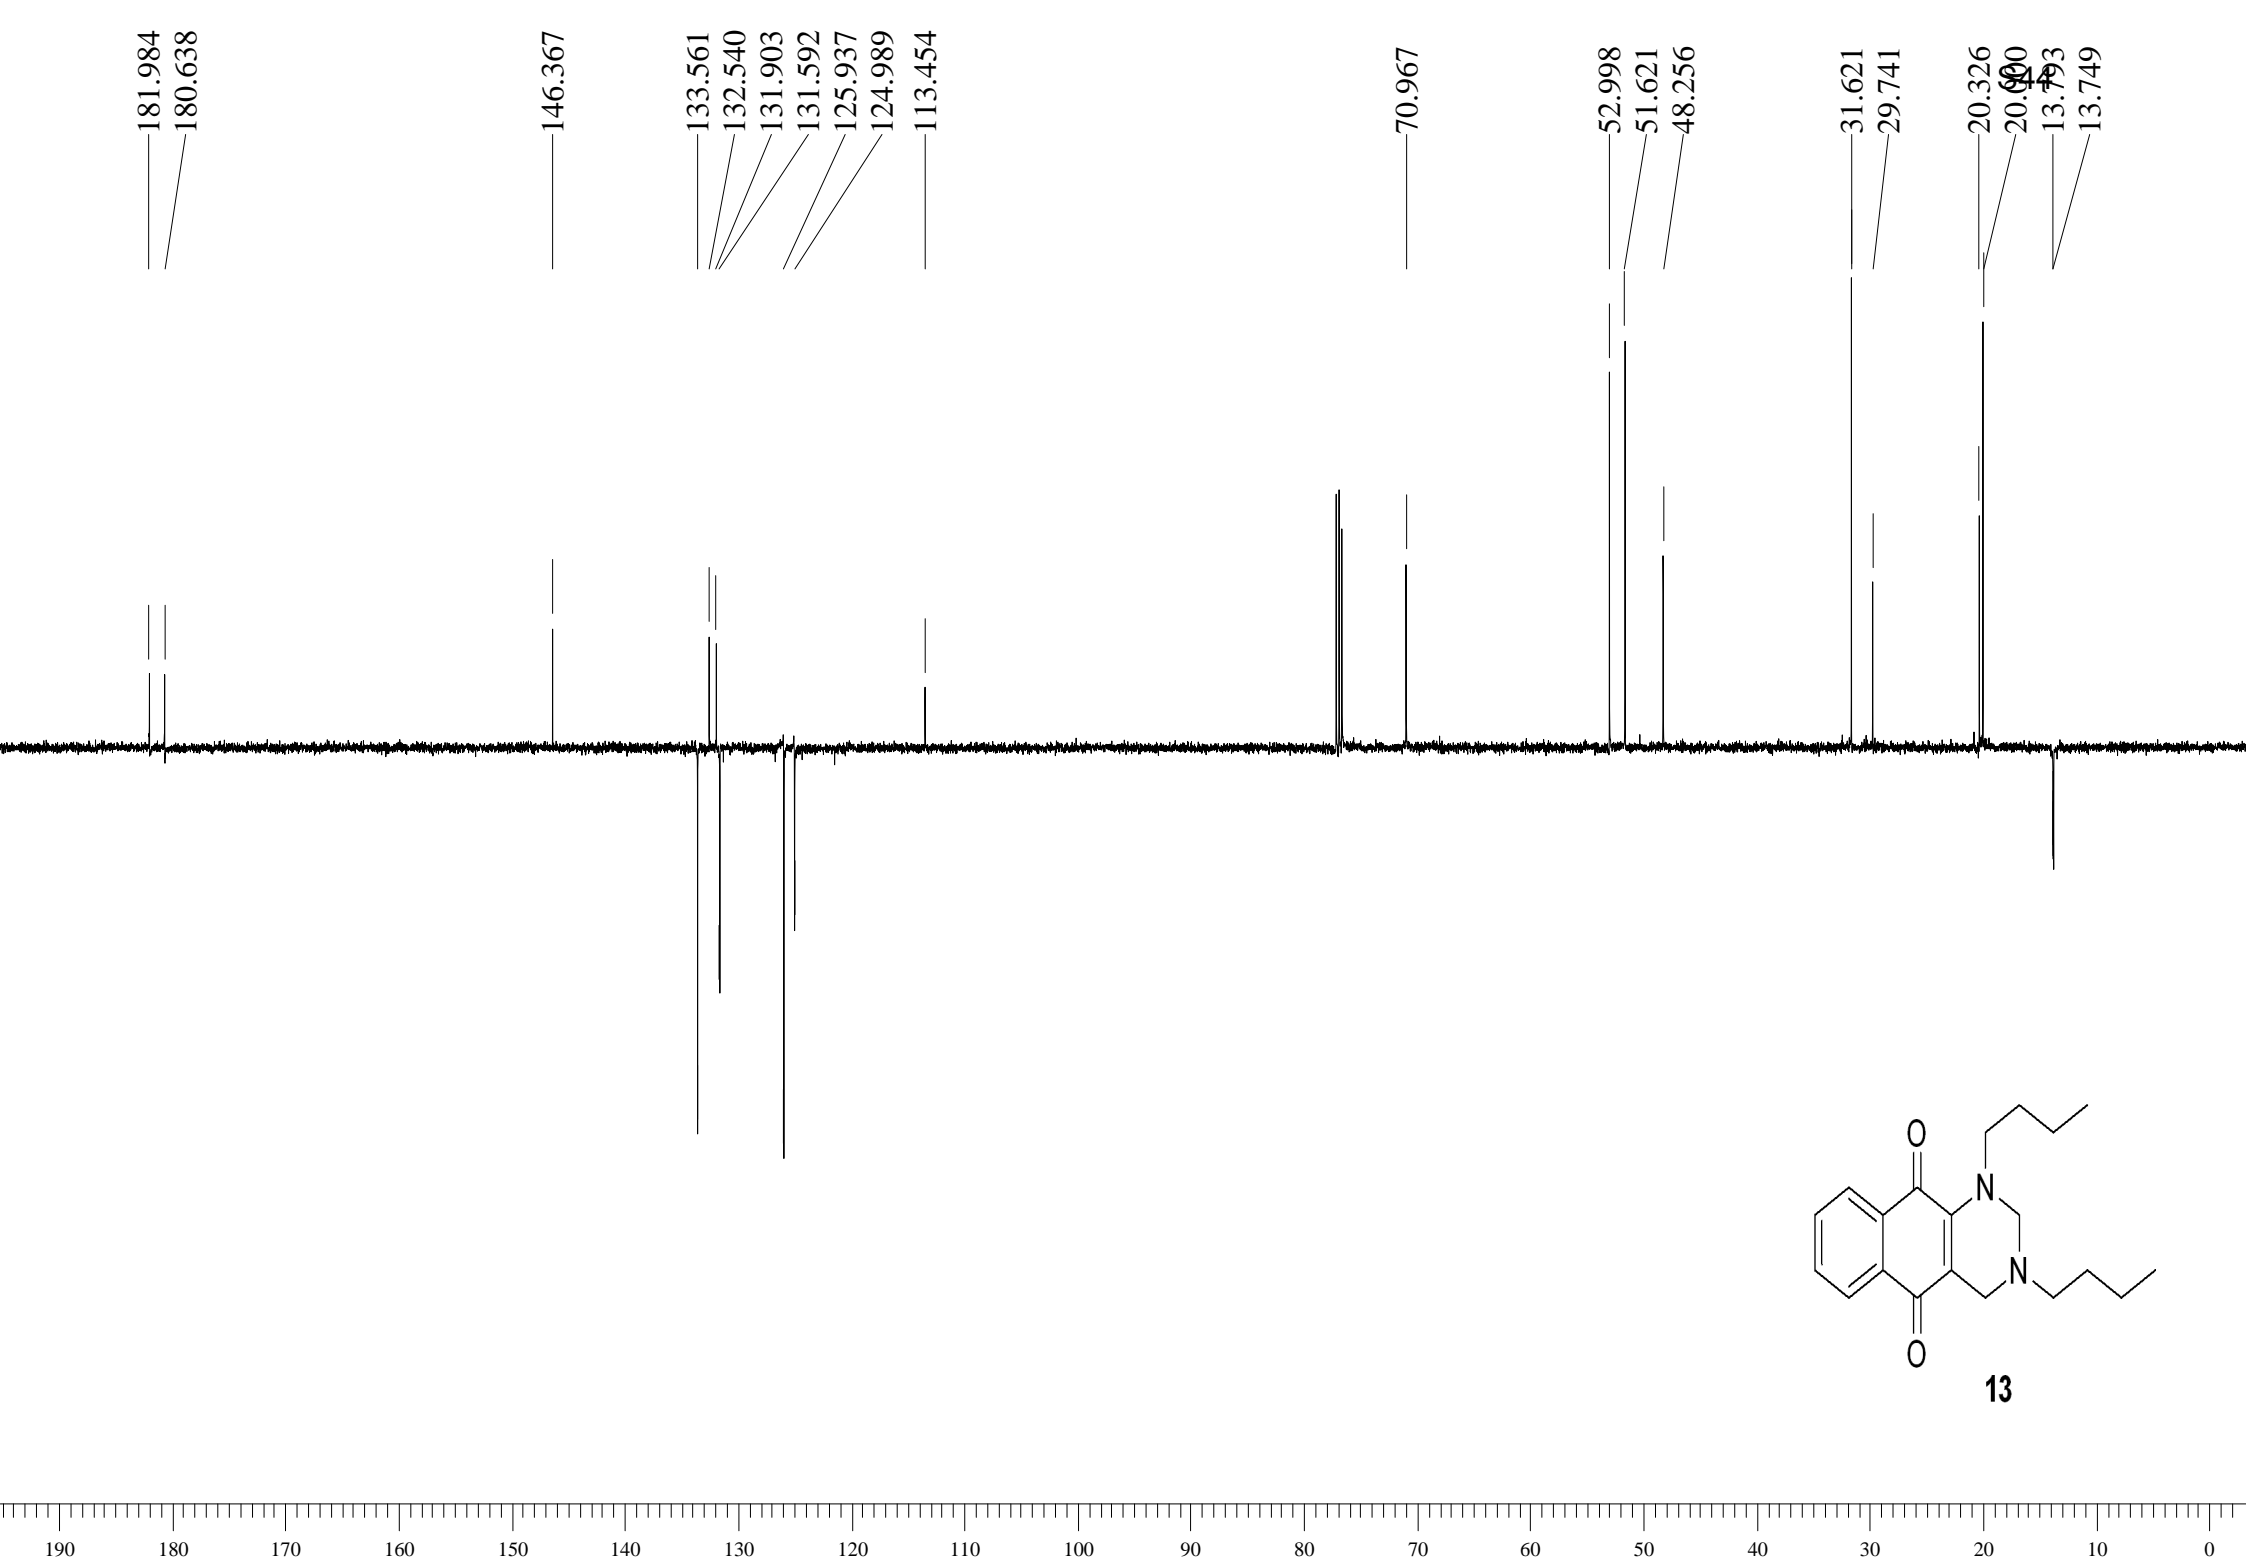

181.984  
180.638

146.367

133.561  
132.540  
131.903  
131.592  
125.937  
124.989  
113.454

70.967

52.998  
51.621  
48.256

31.621  
29.741

20.326  
20.000  
13.793  
13.749

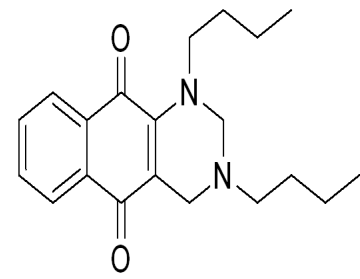

13

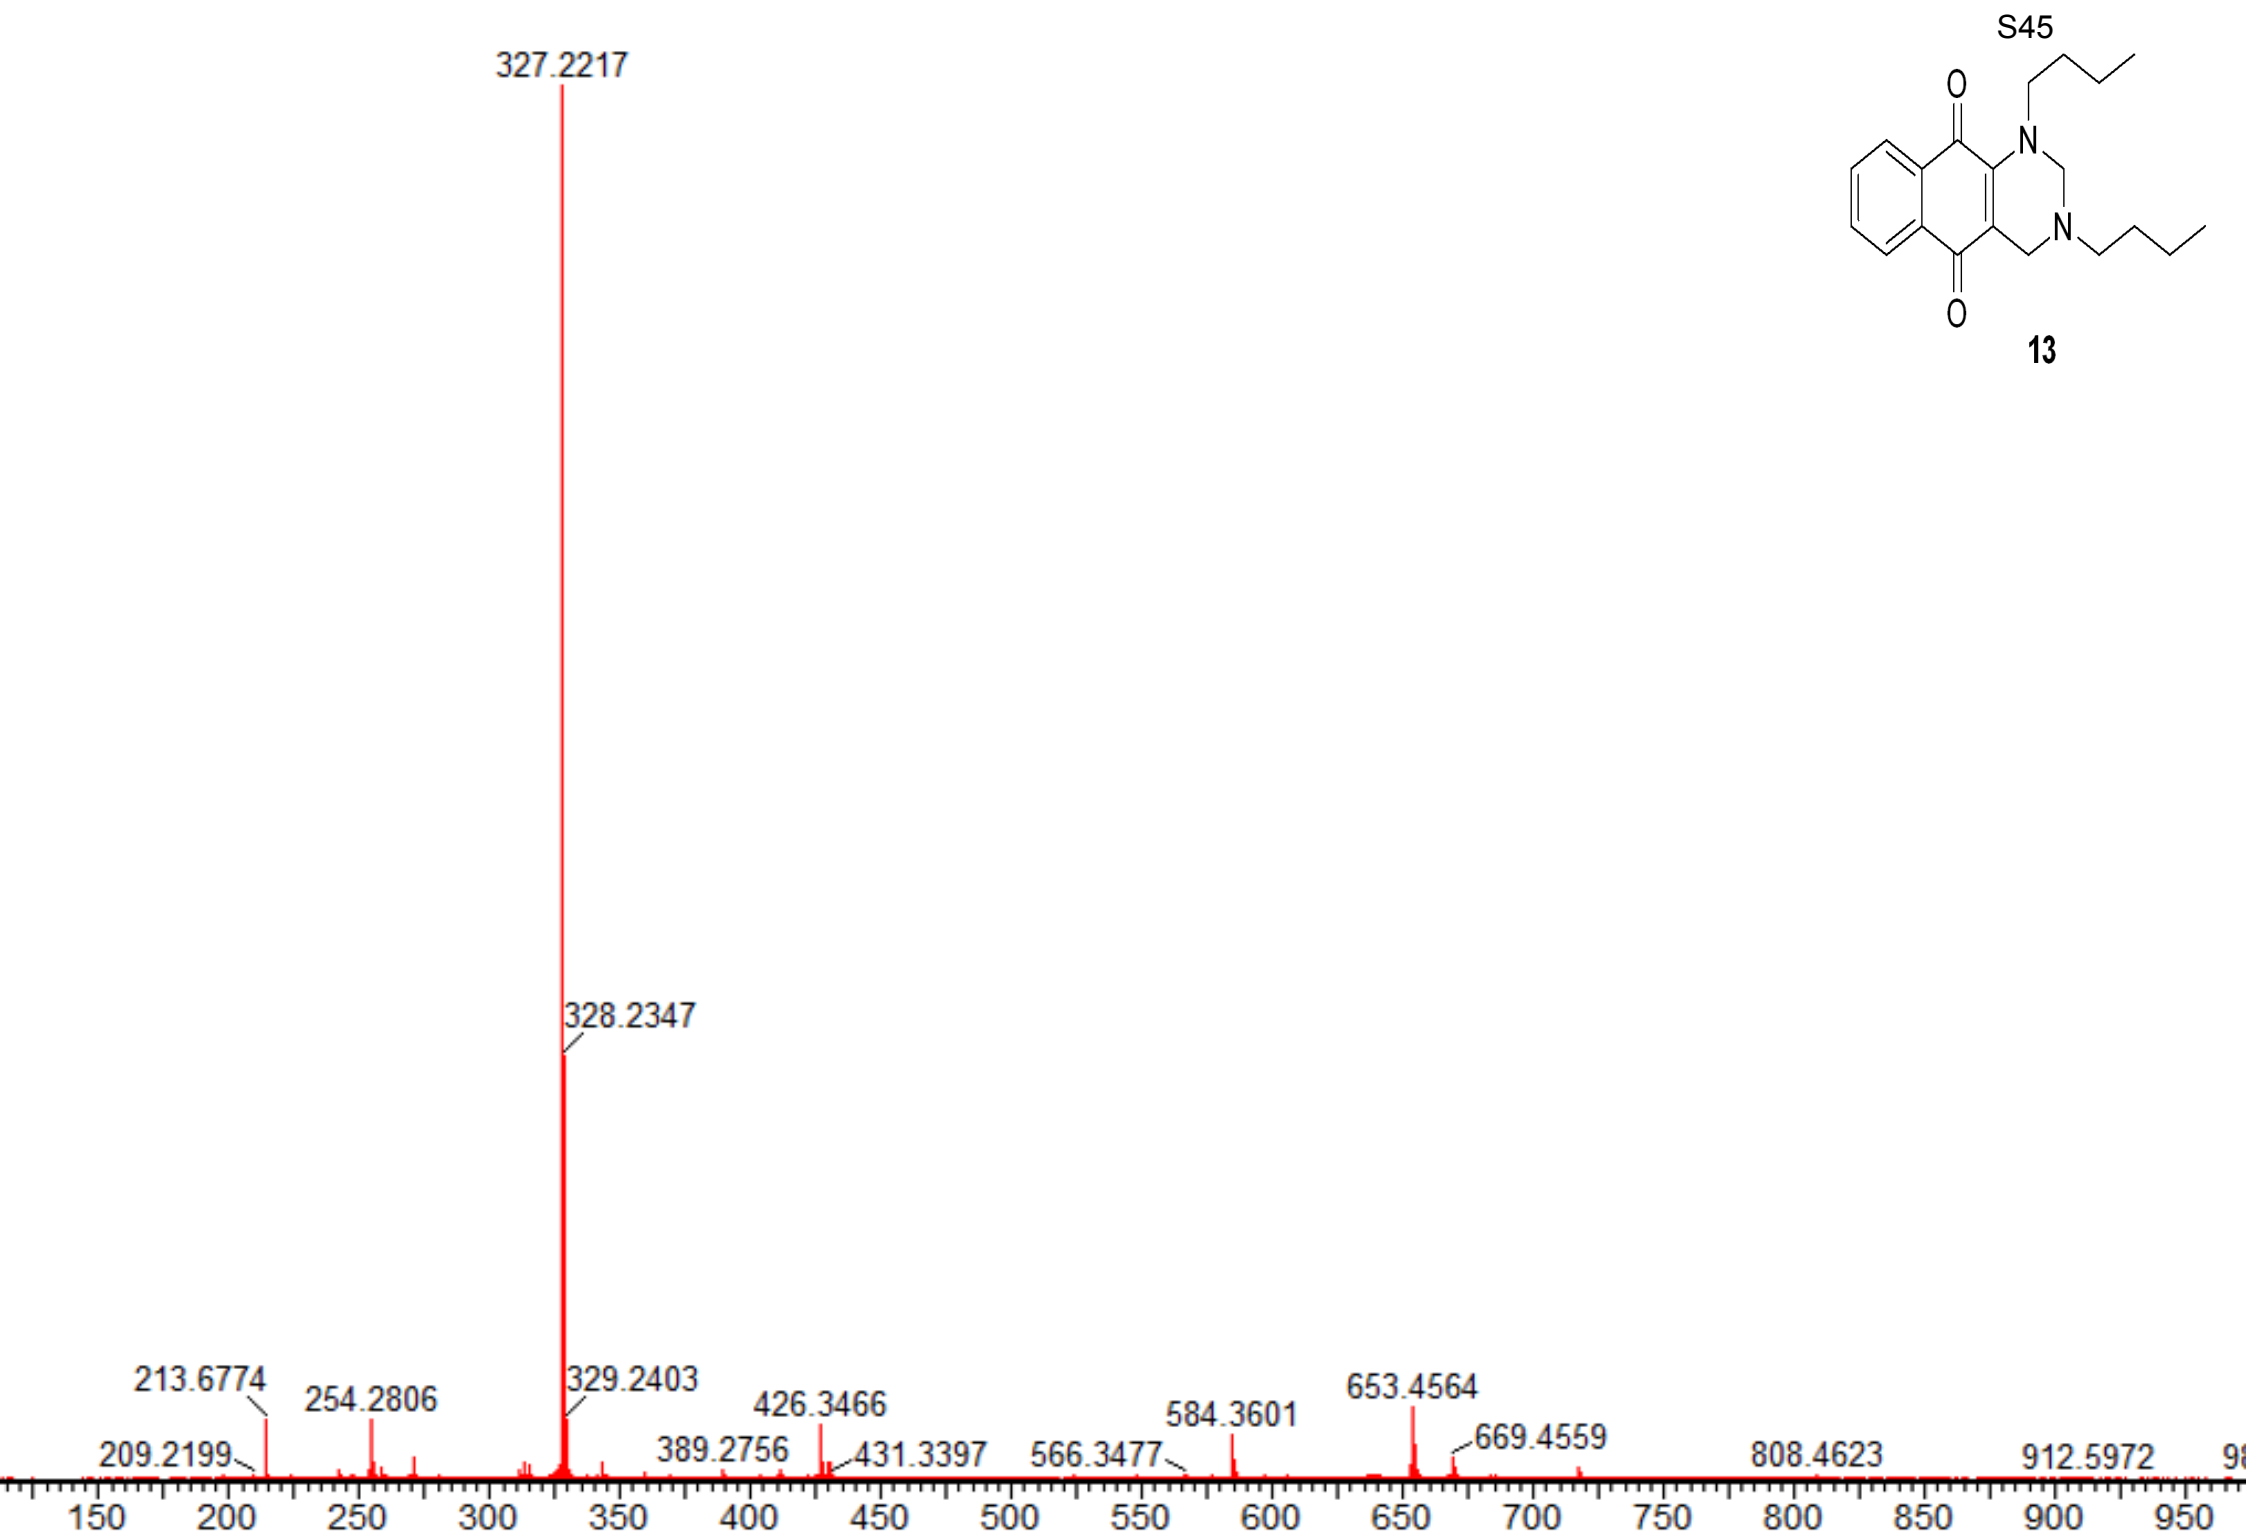



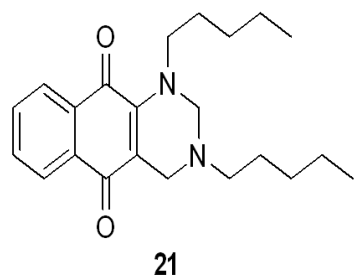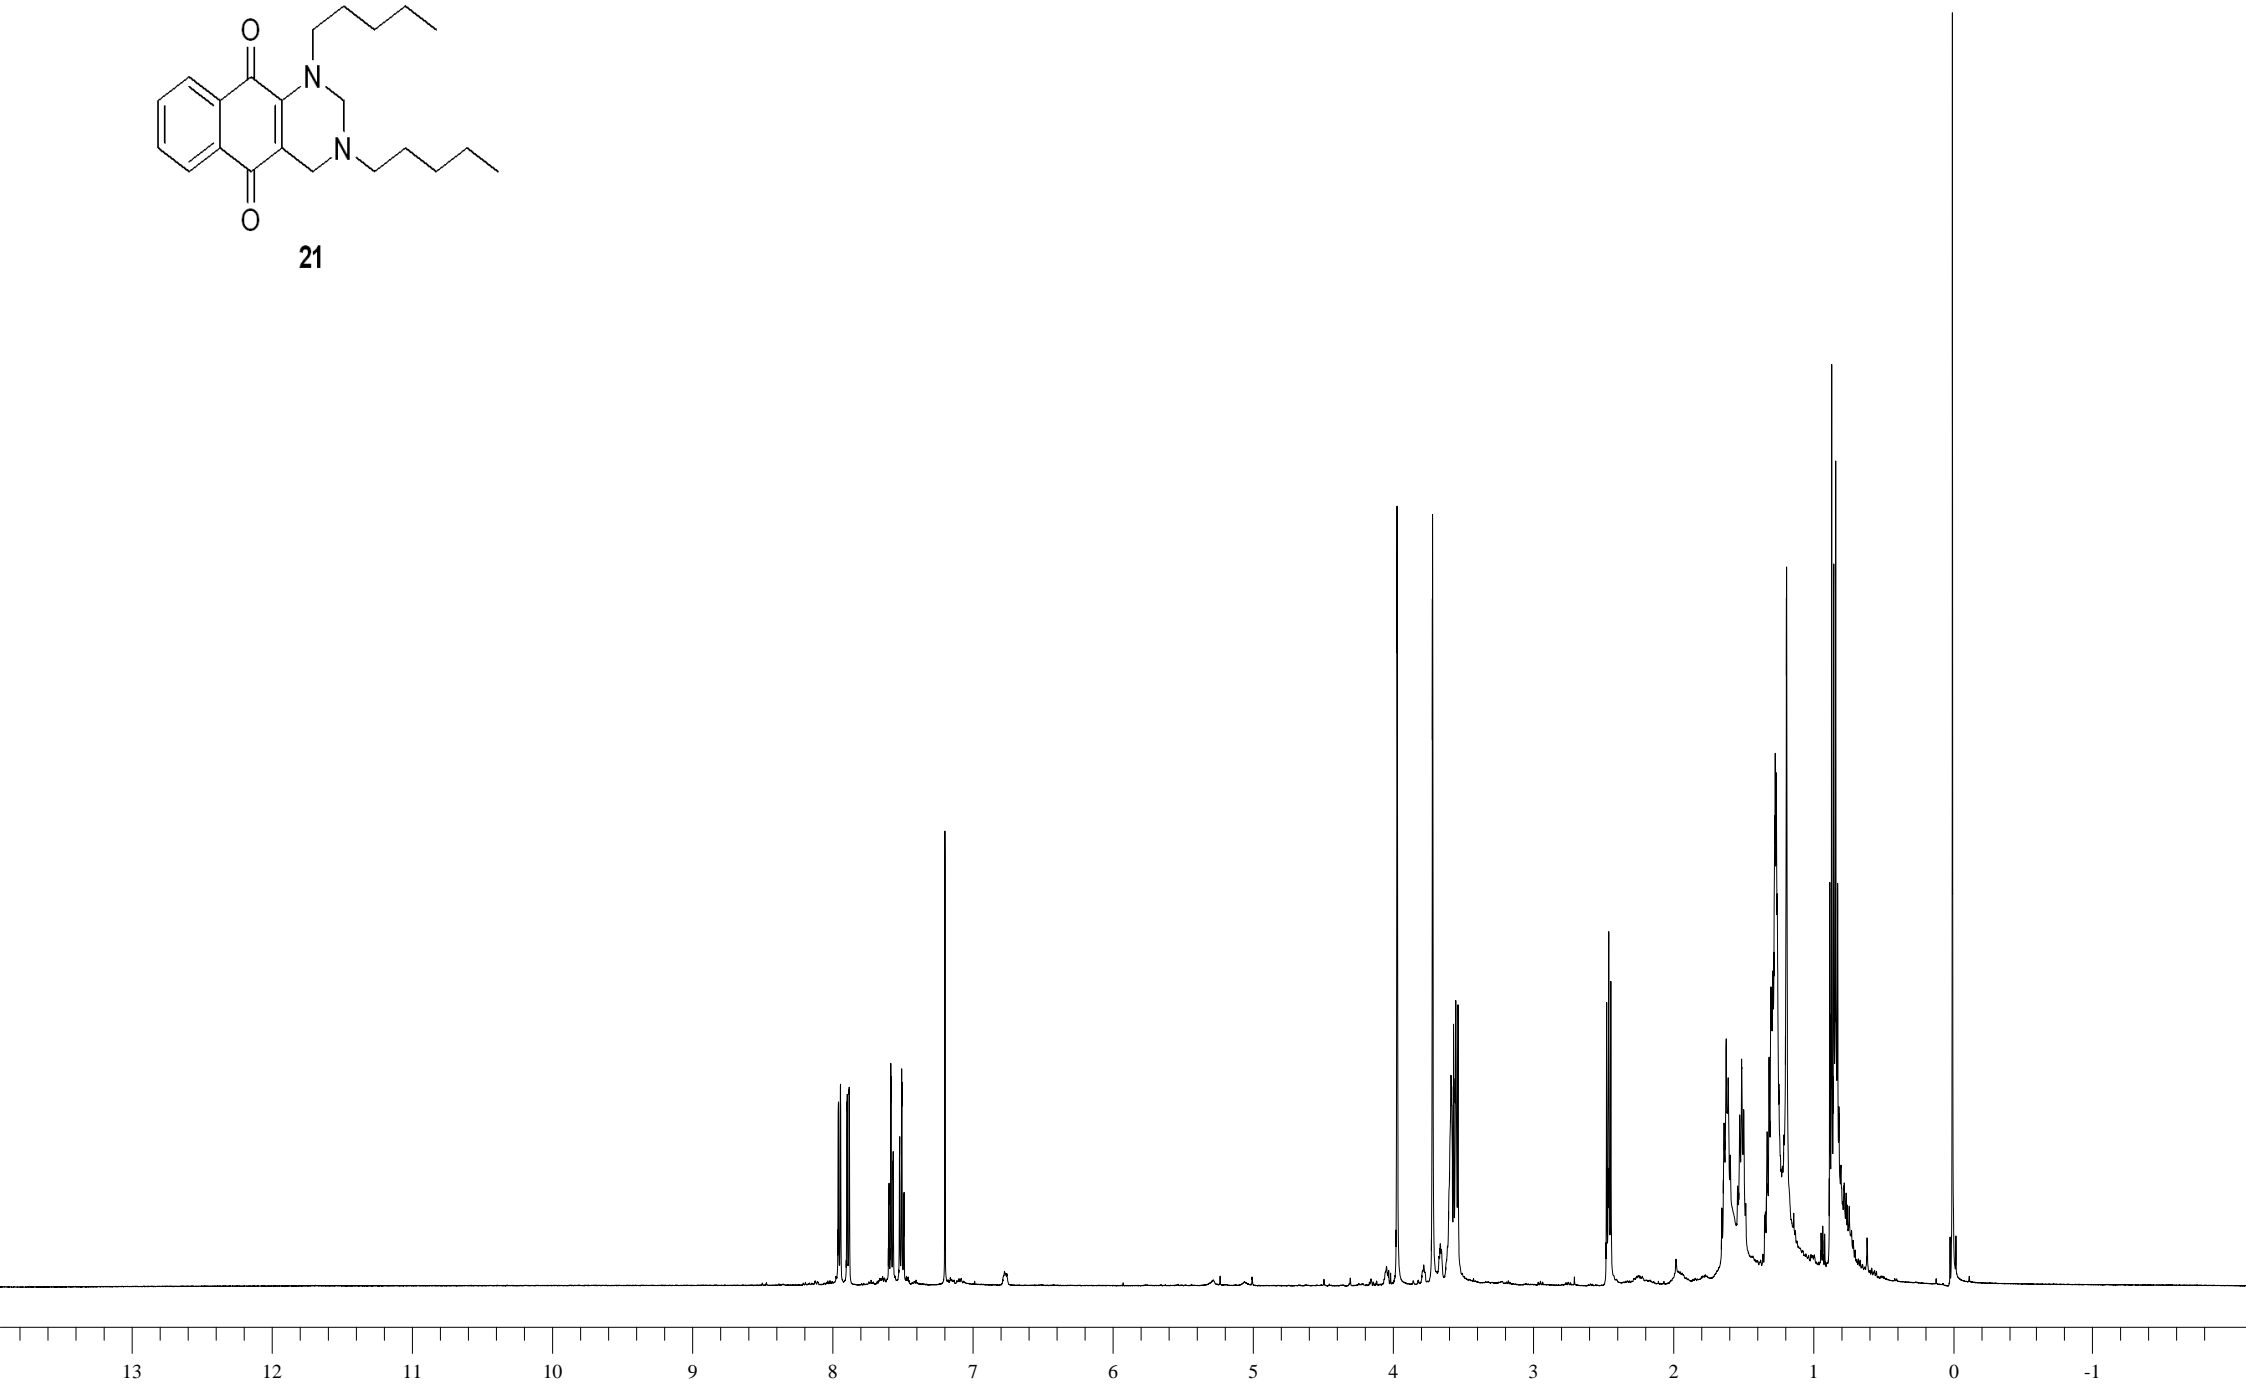

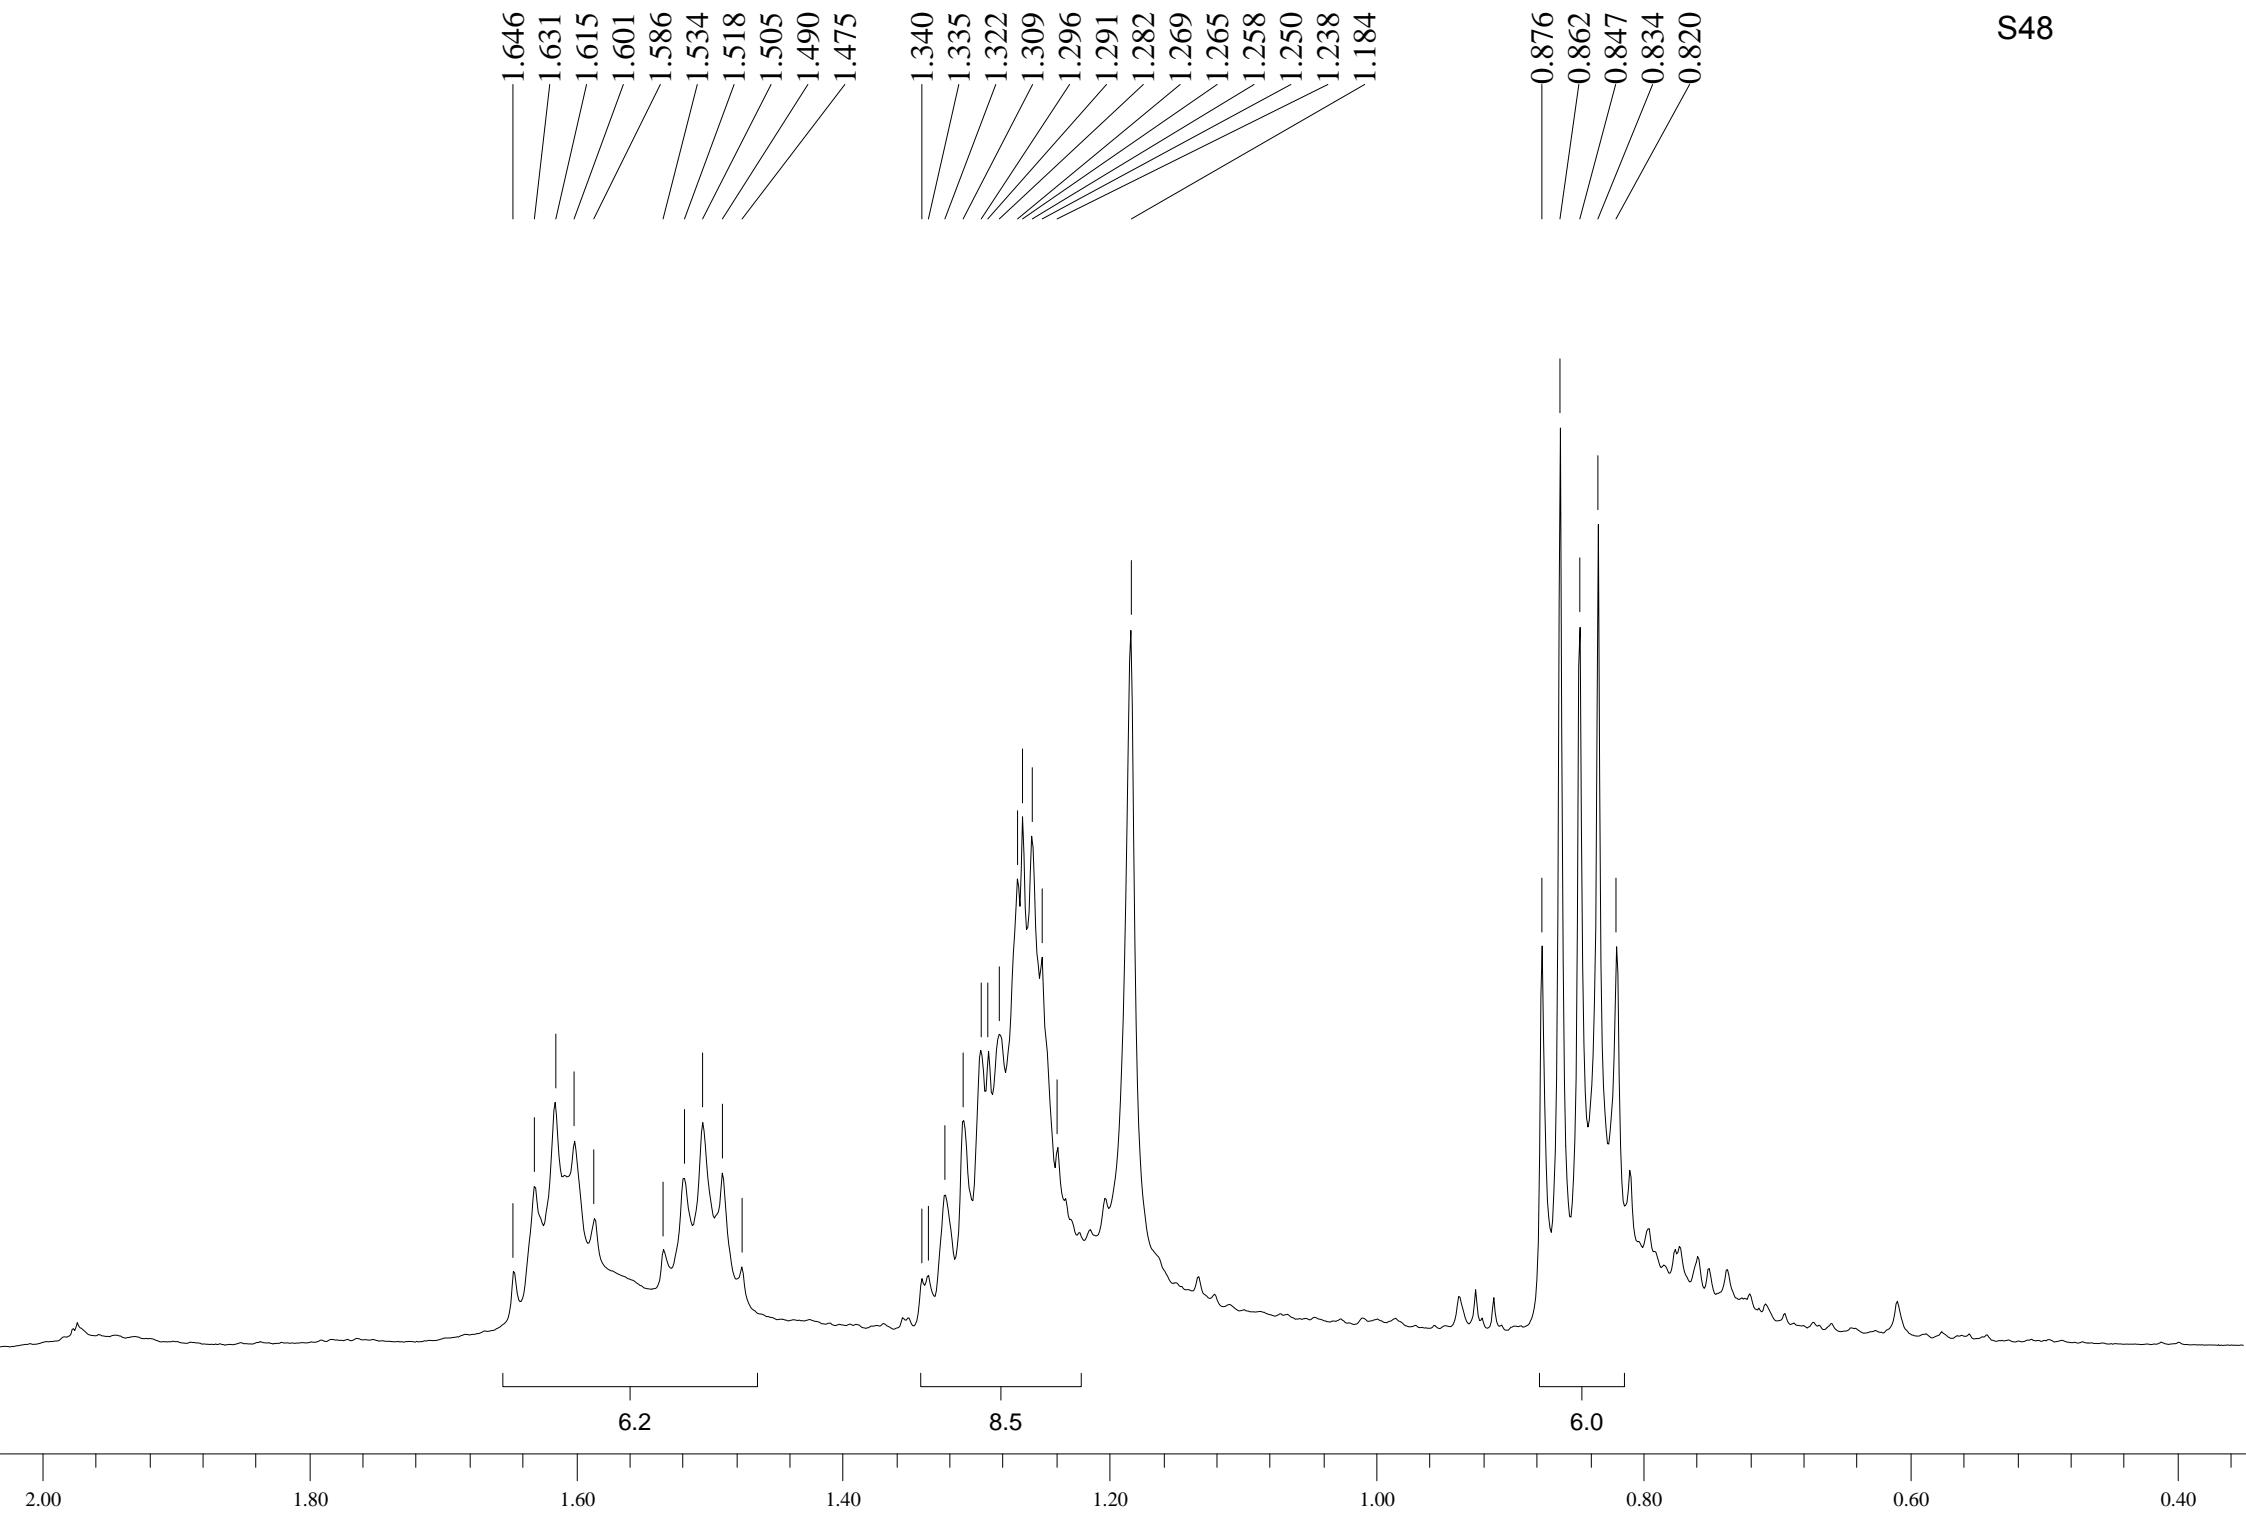



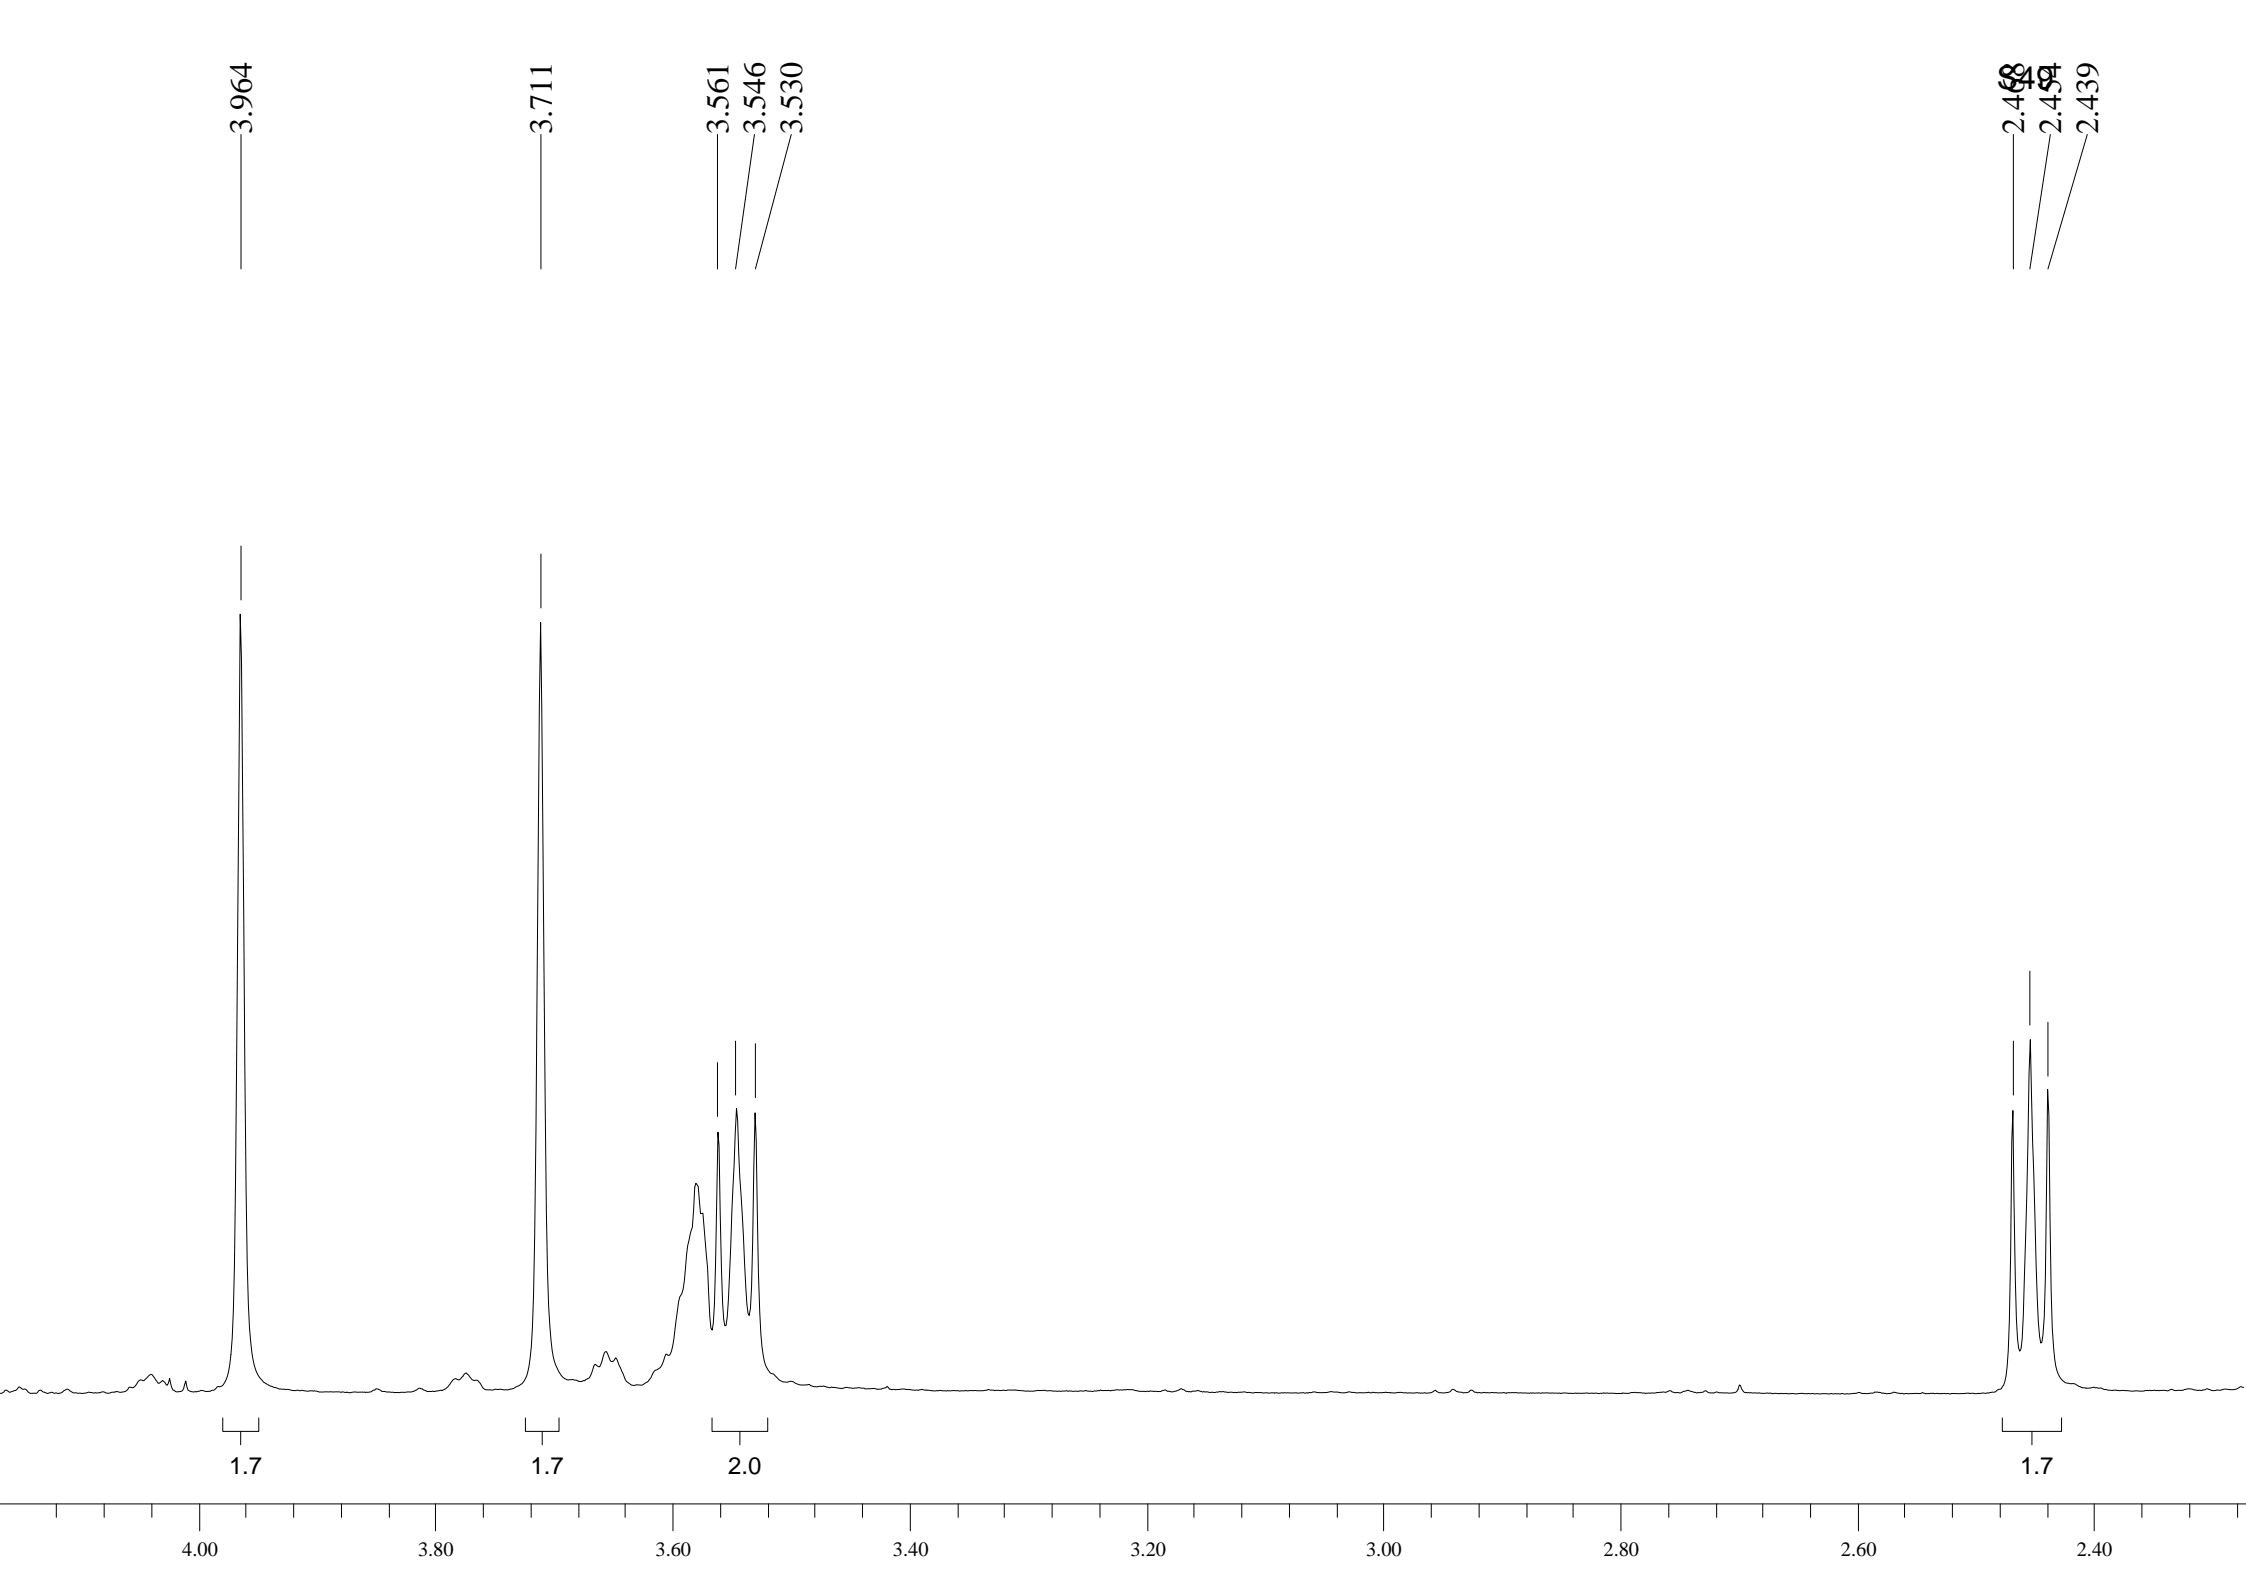

7.952  
7.939  
7.937

7.892  
7.876  
7.874

7.594  
7.592  
7.579  
7.576  
7.564  
7.561

7.516  
7.514  
7.502  
7.499  
7.487  
7.484

S50

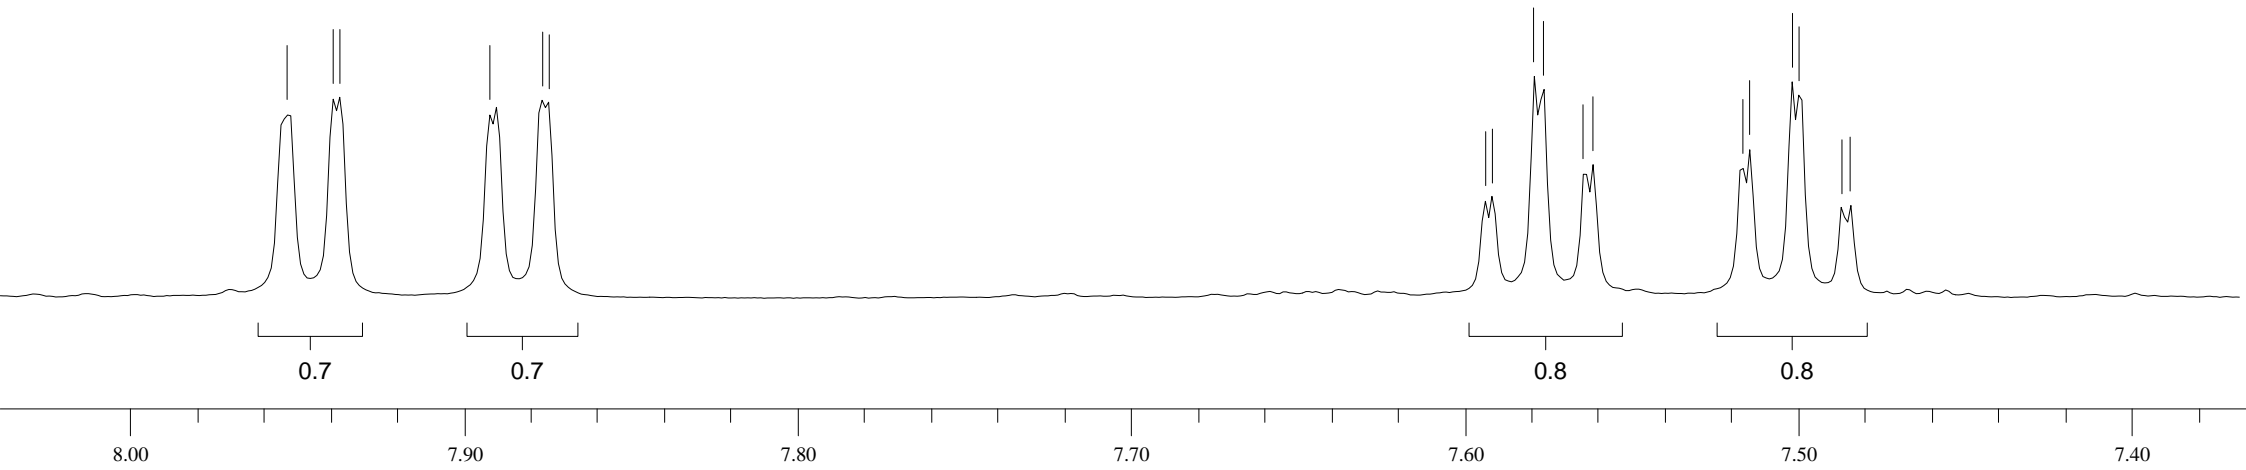

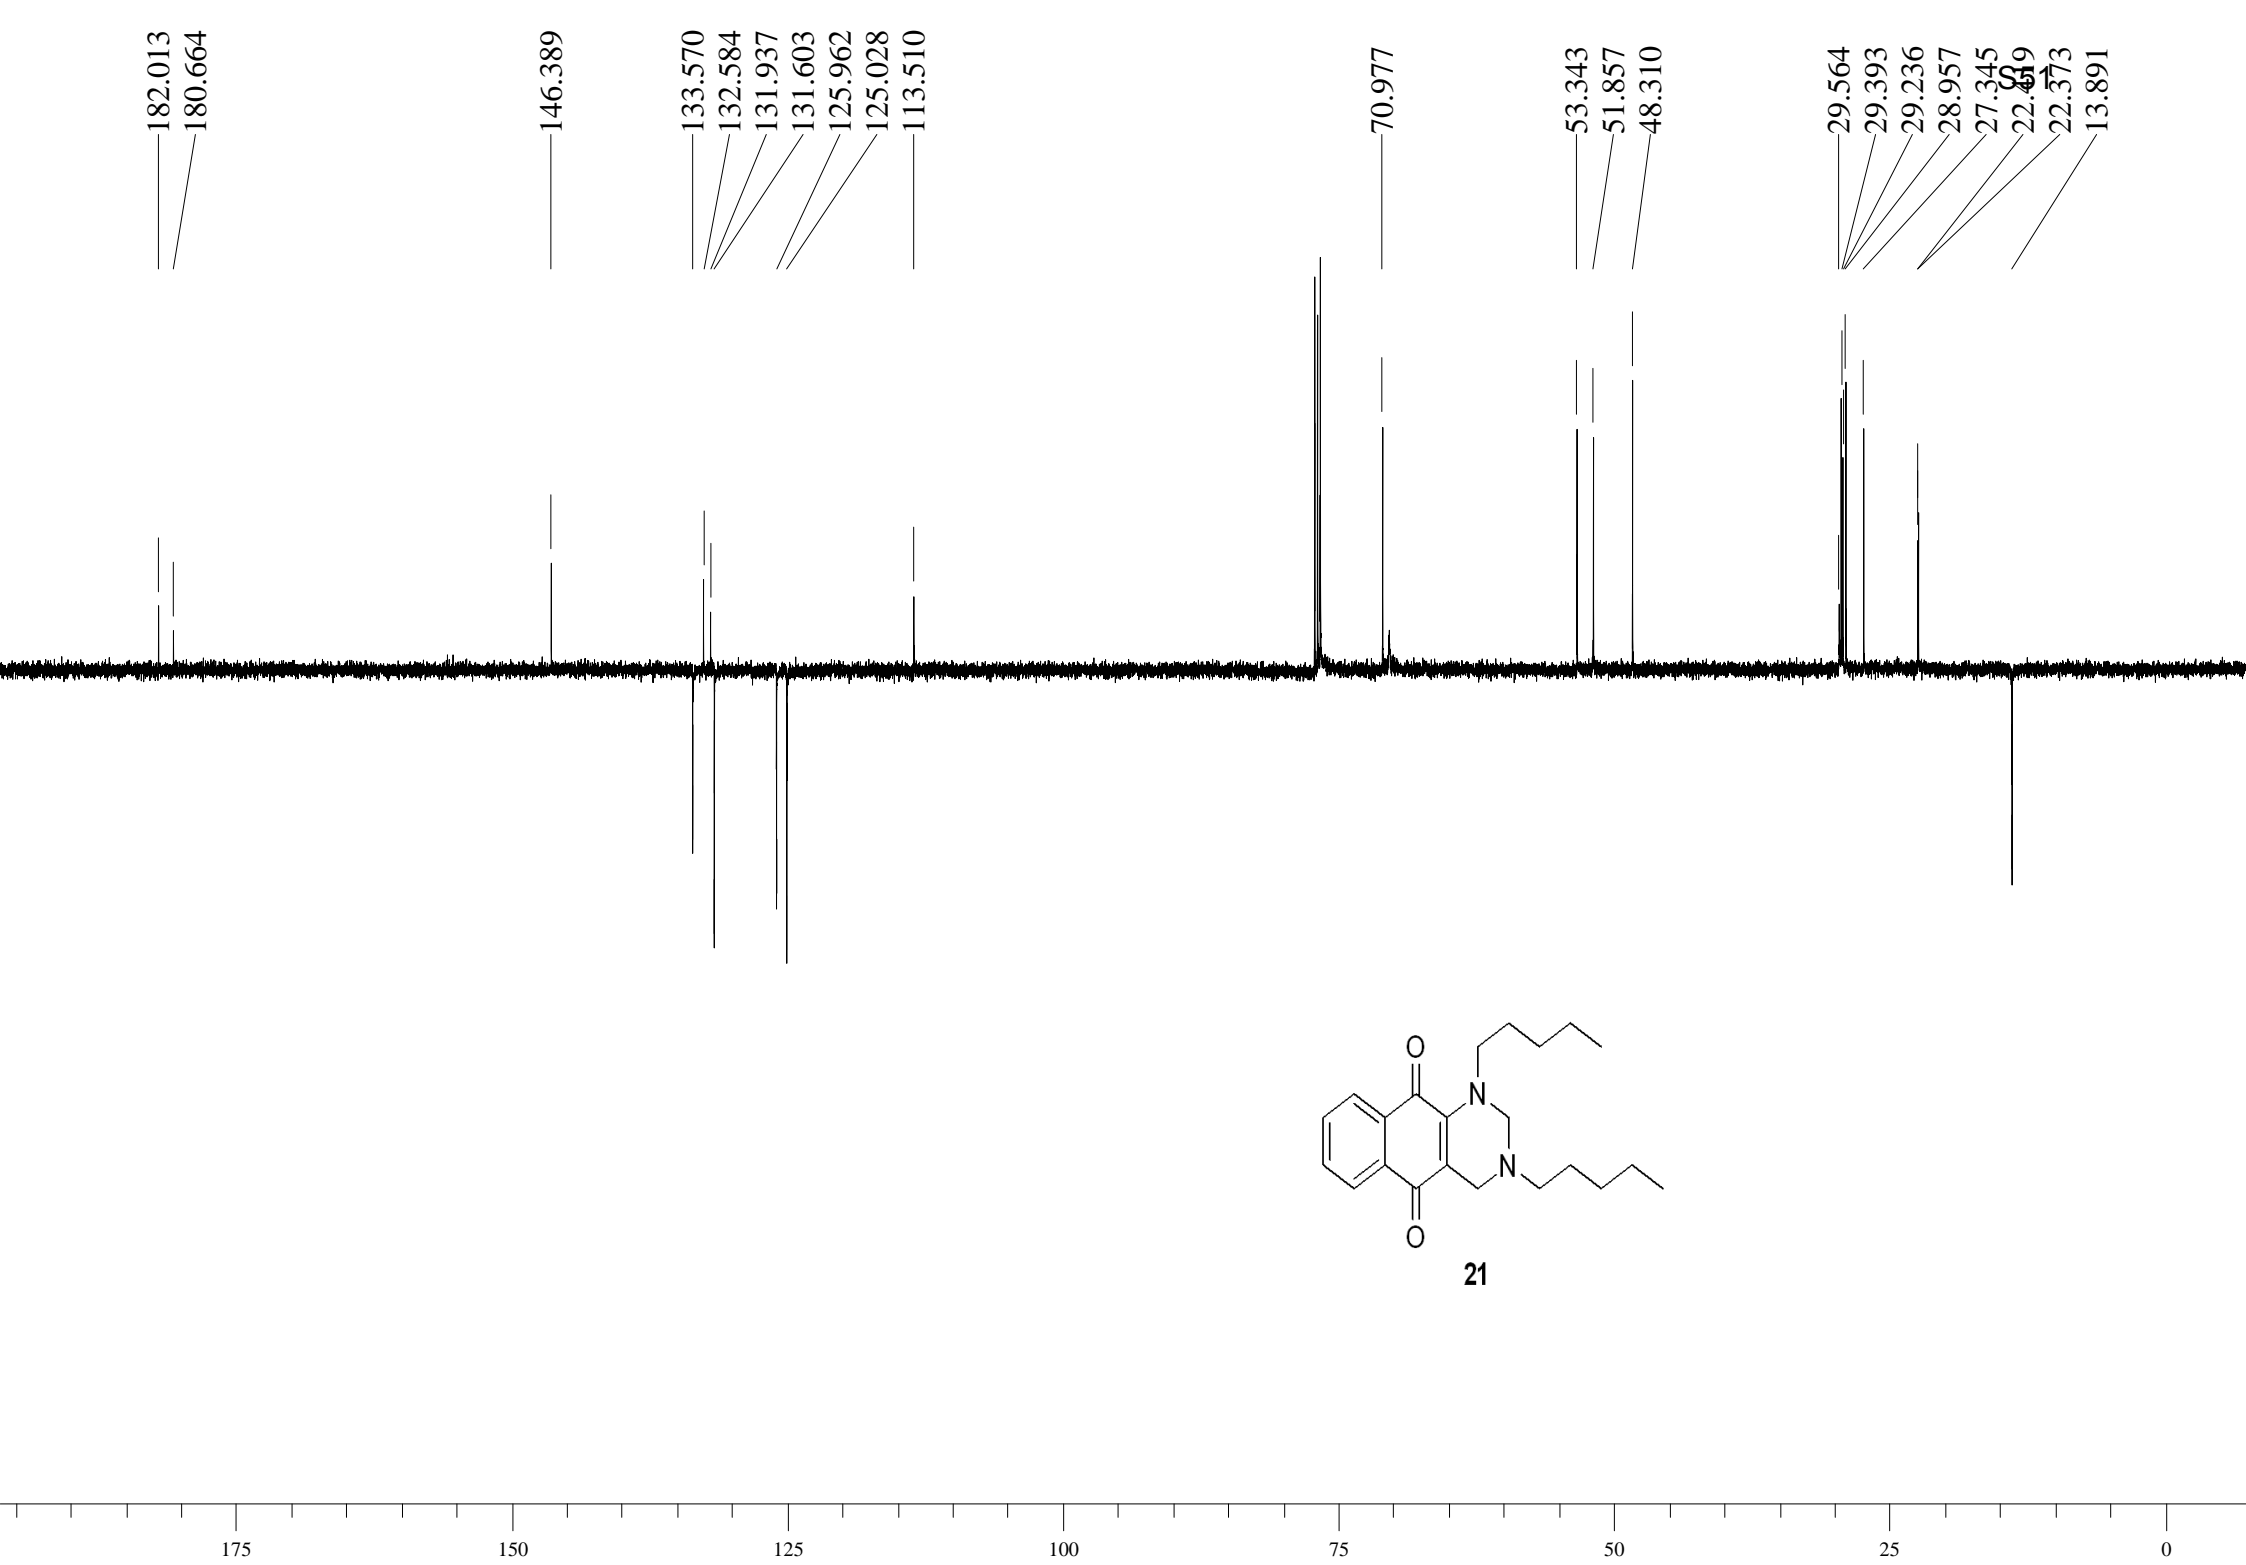

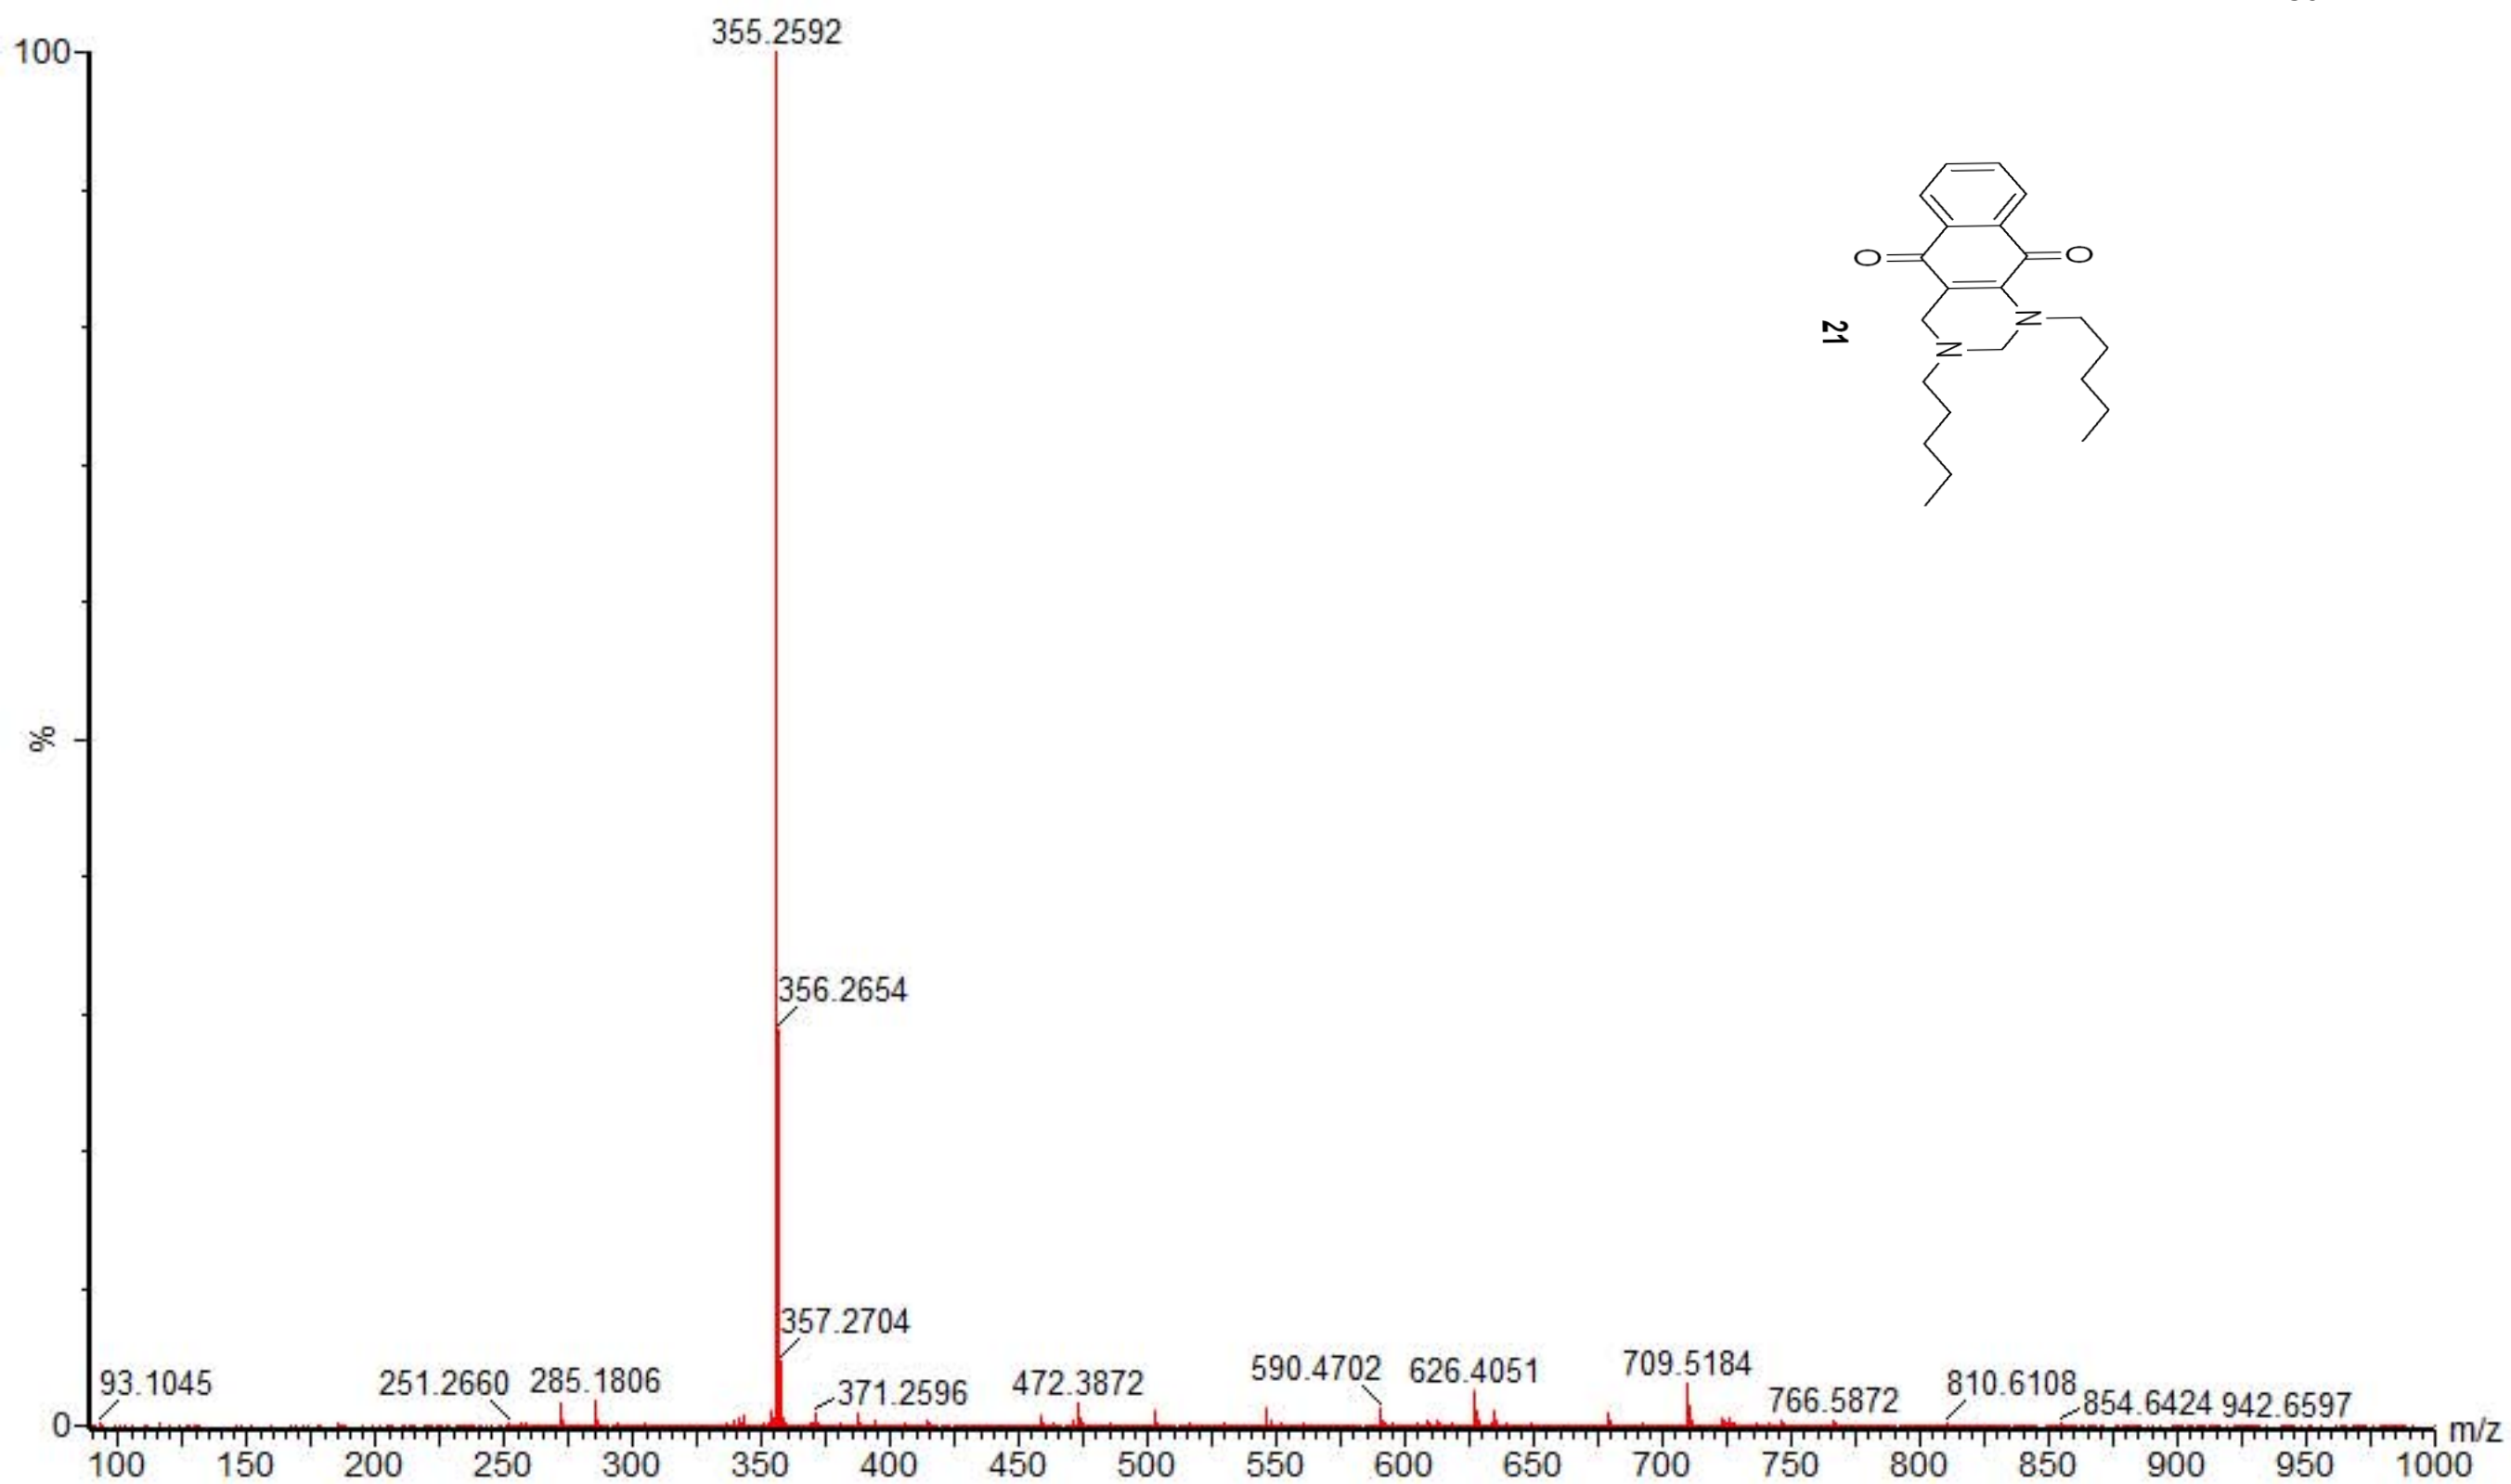

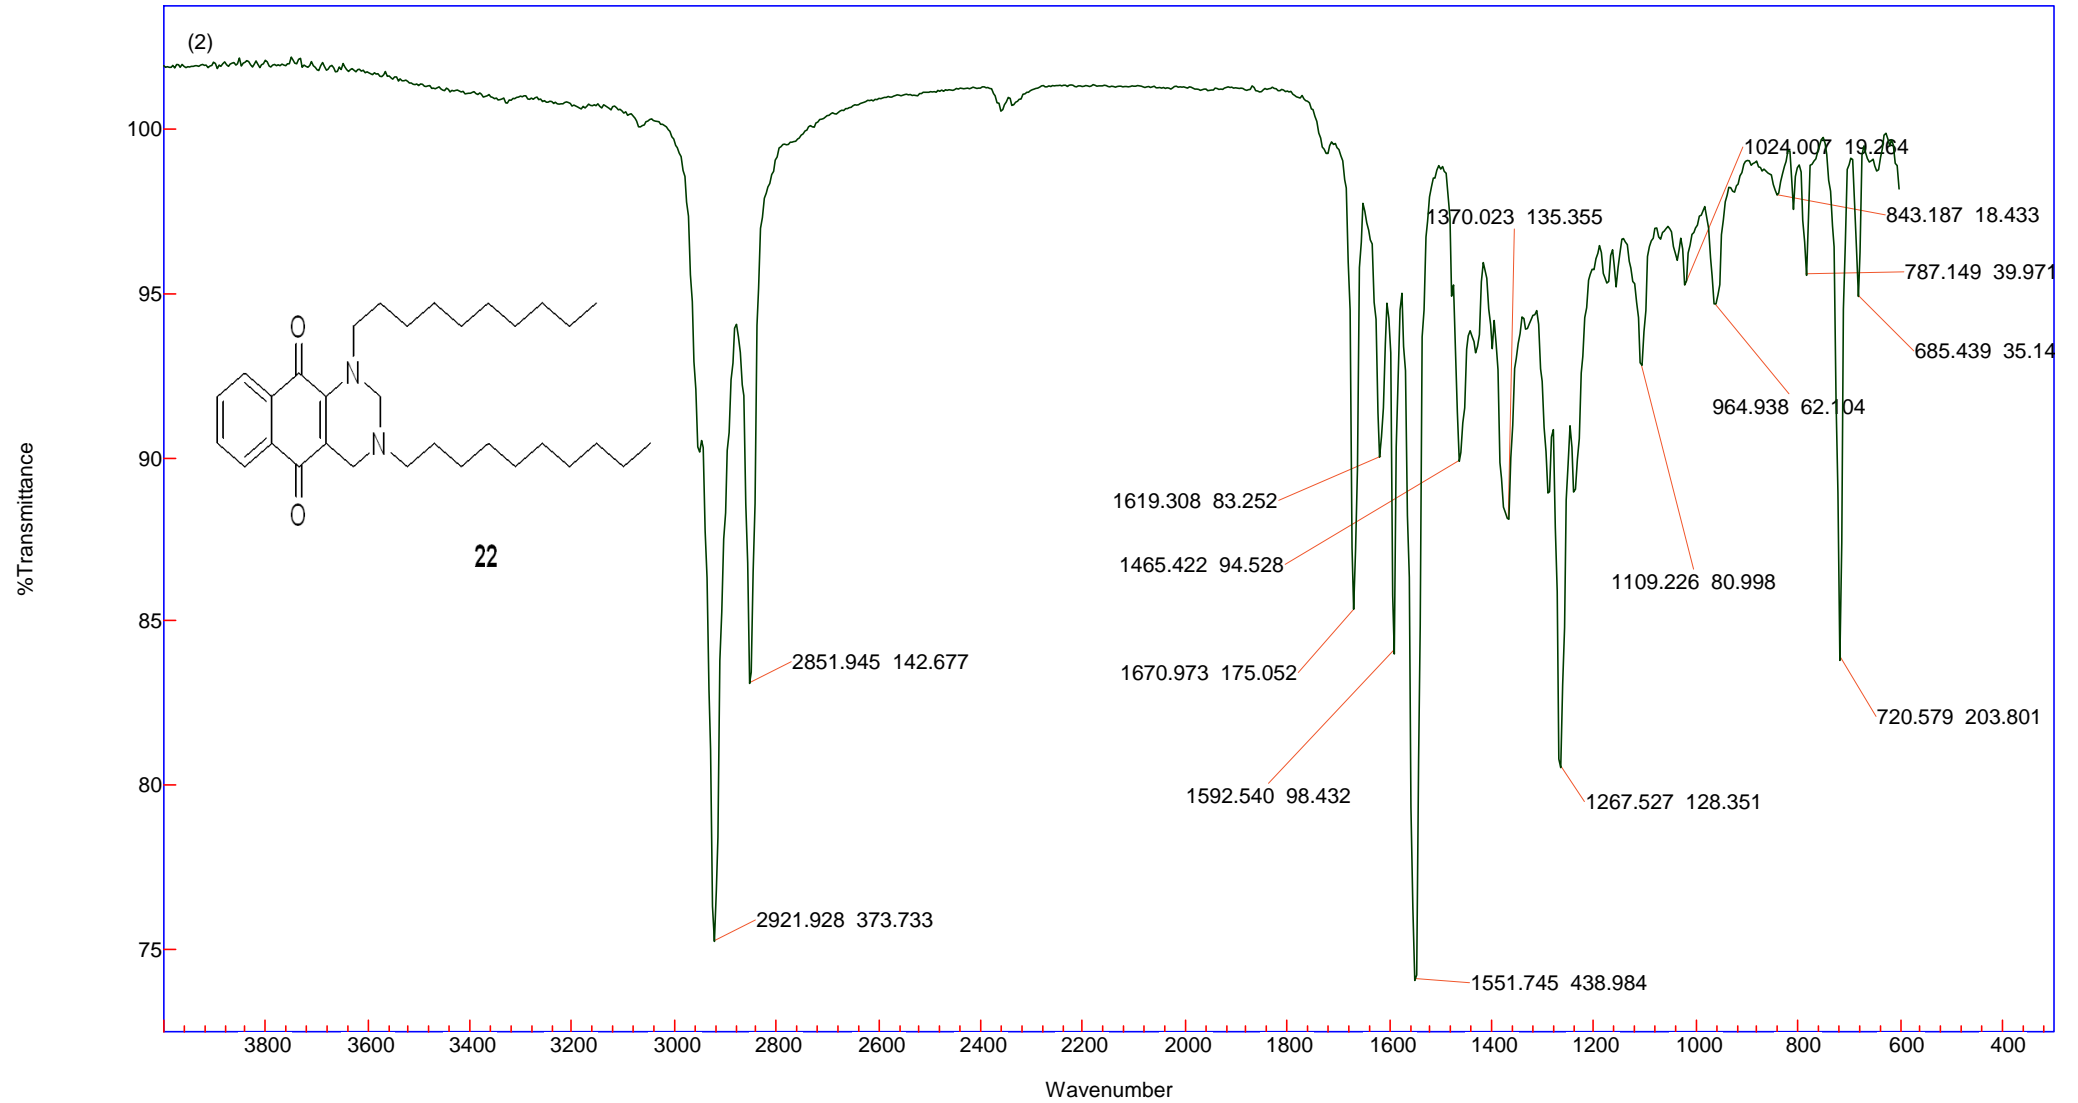

| Name |
|------|
| (2)  |

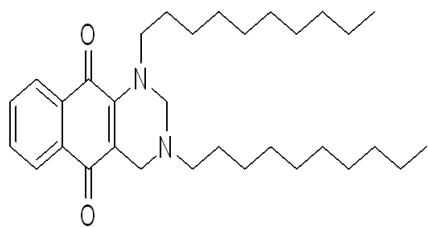

22

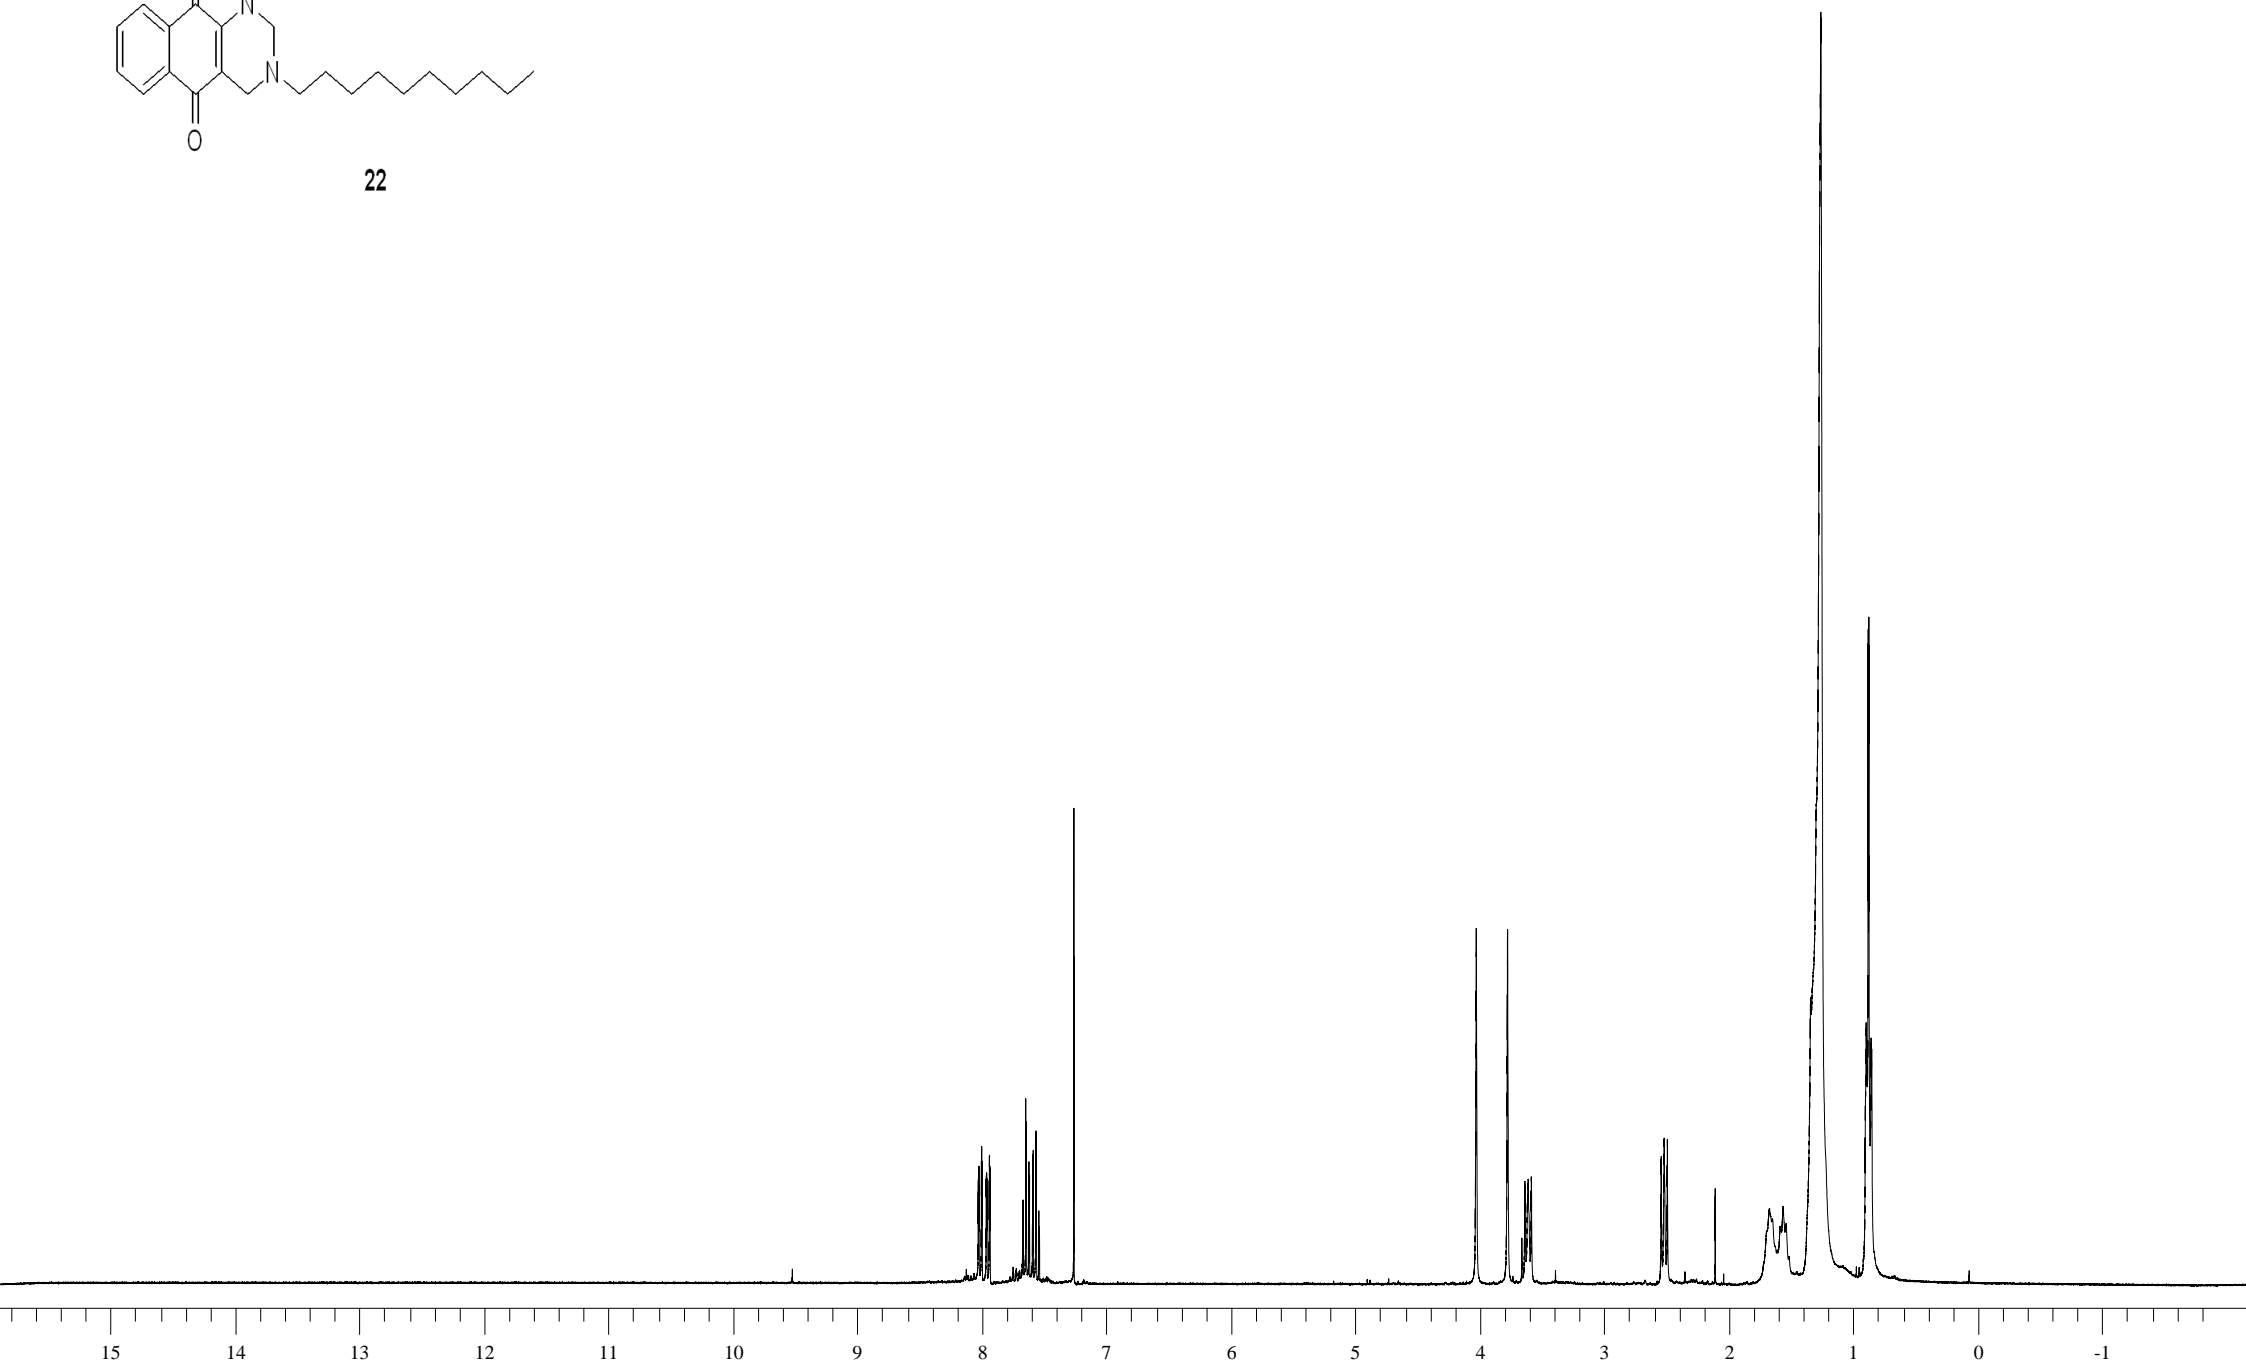

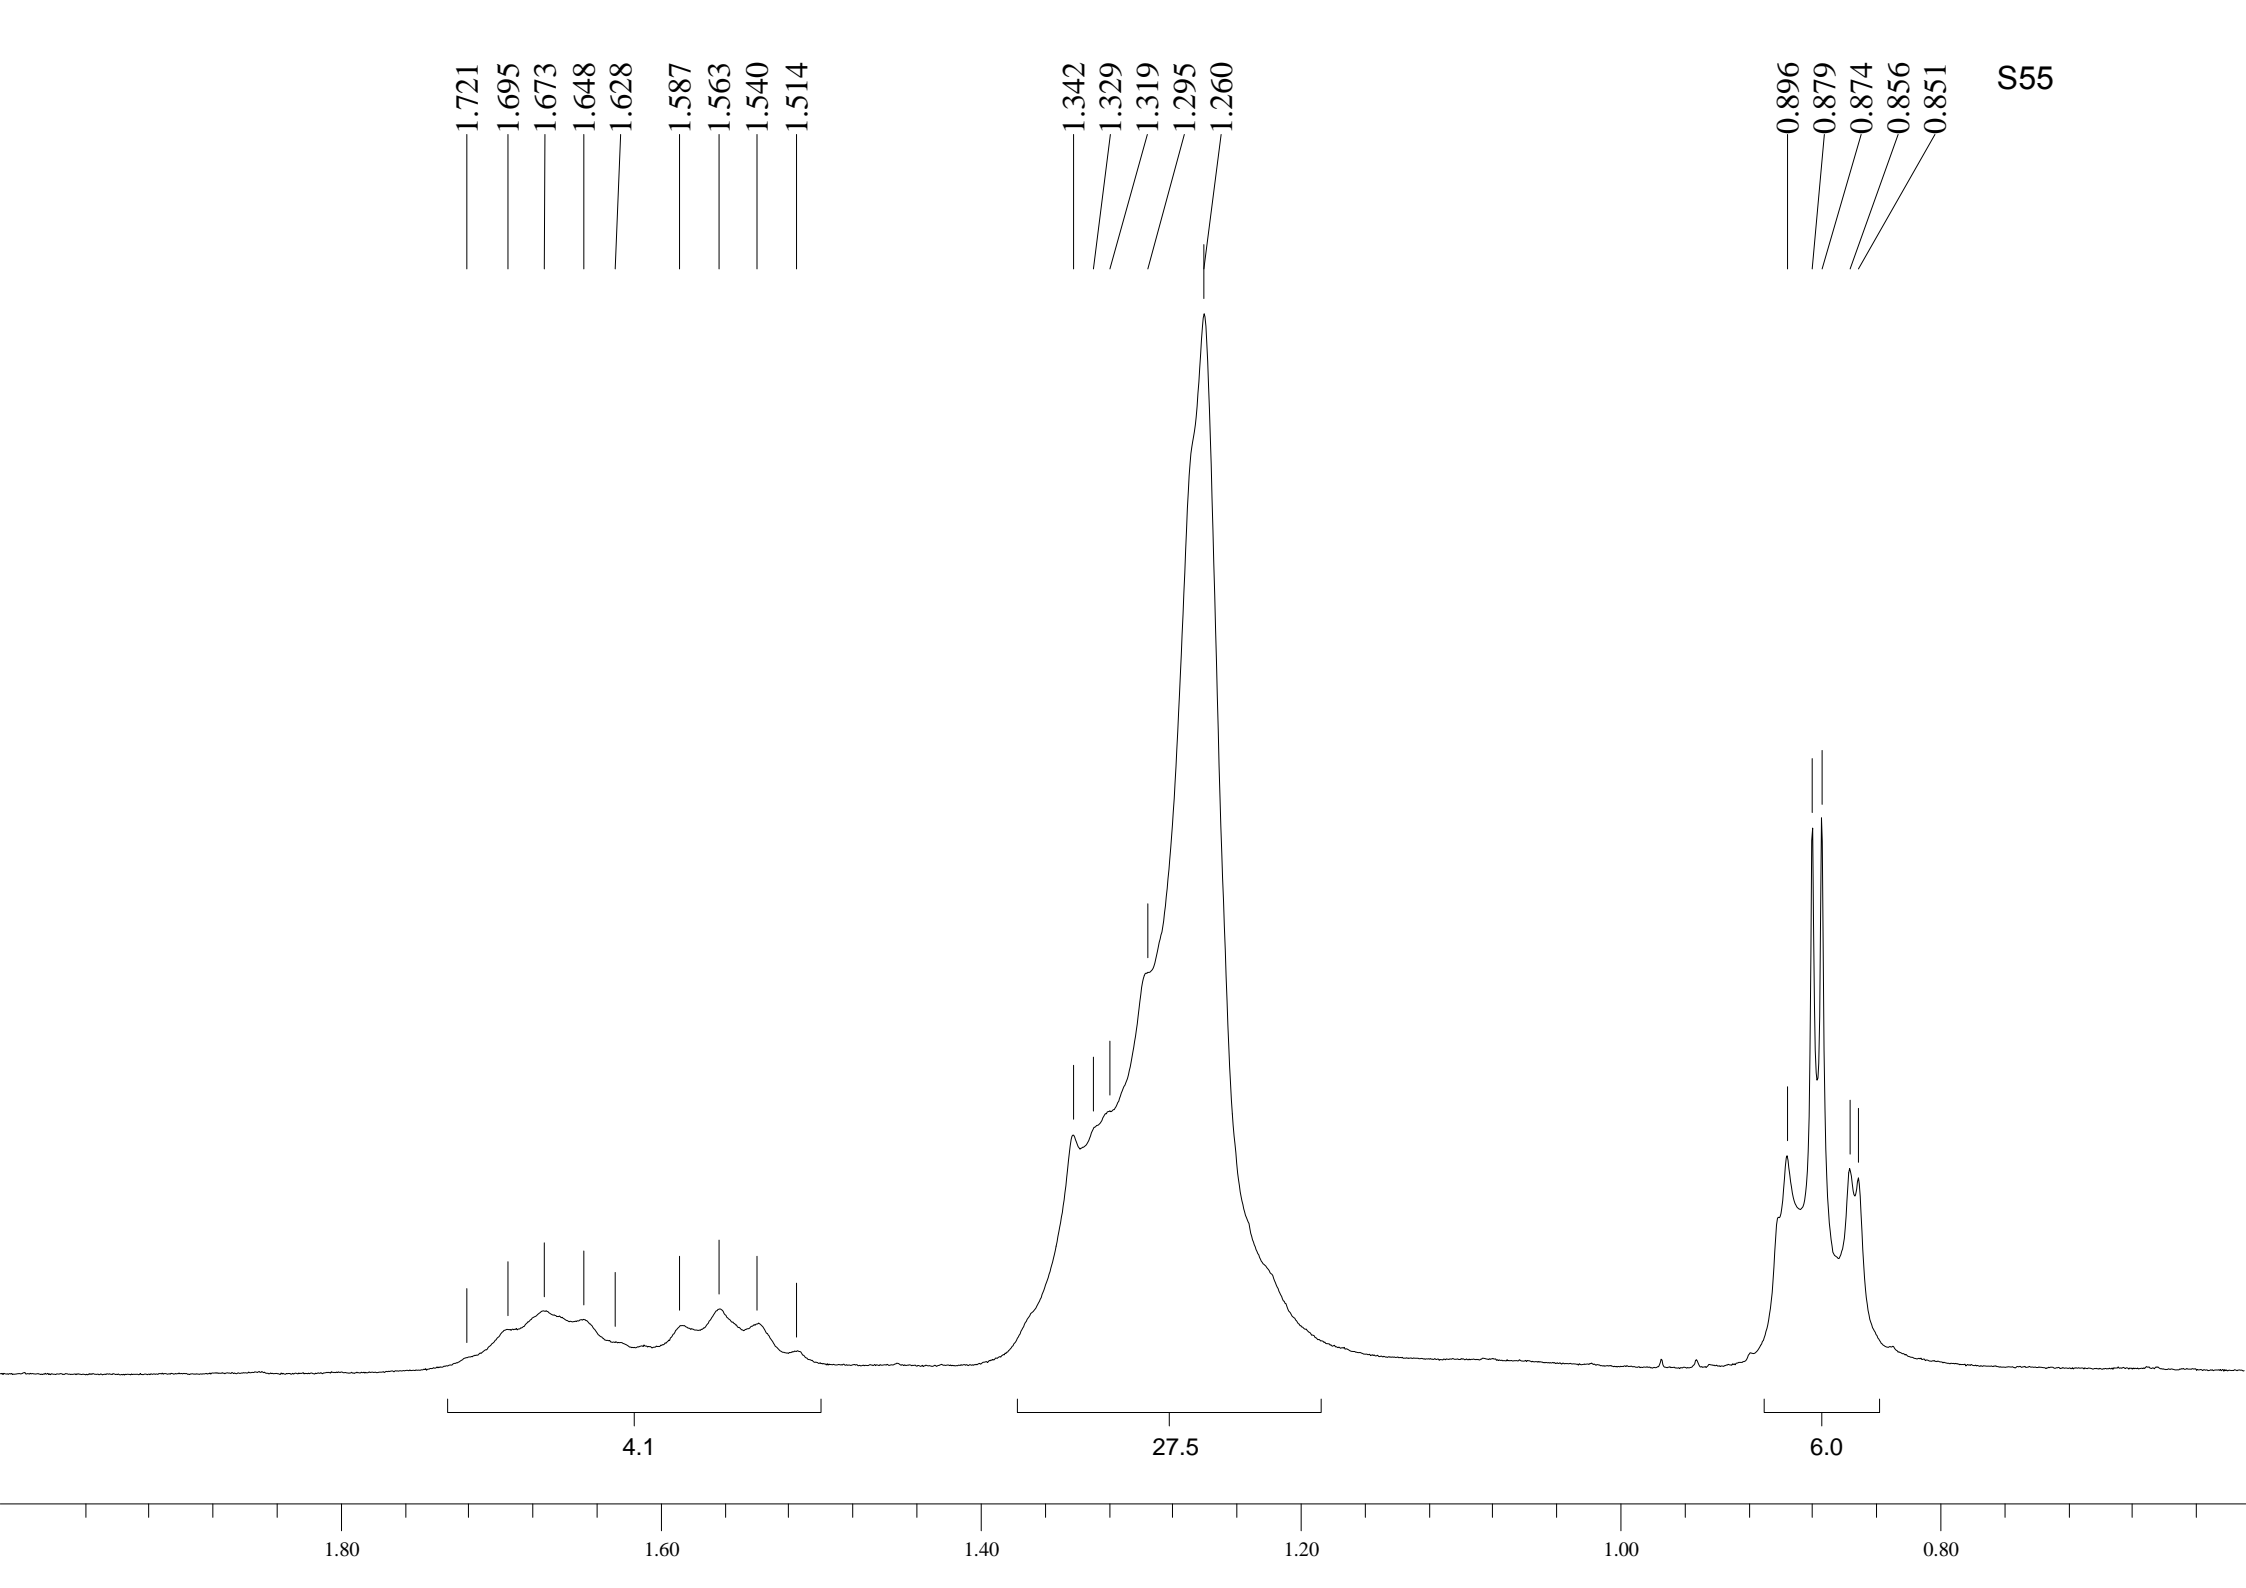

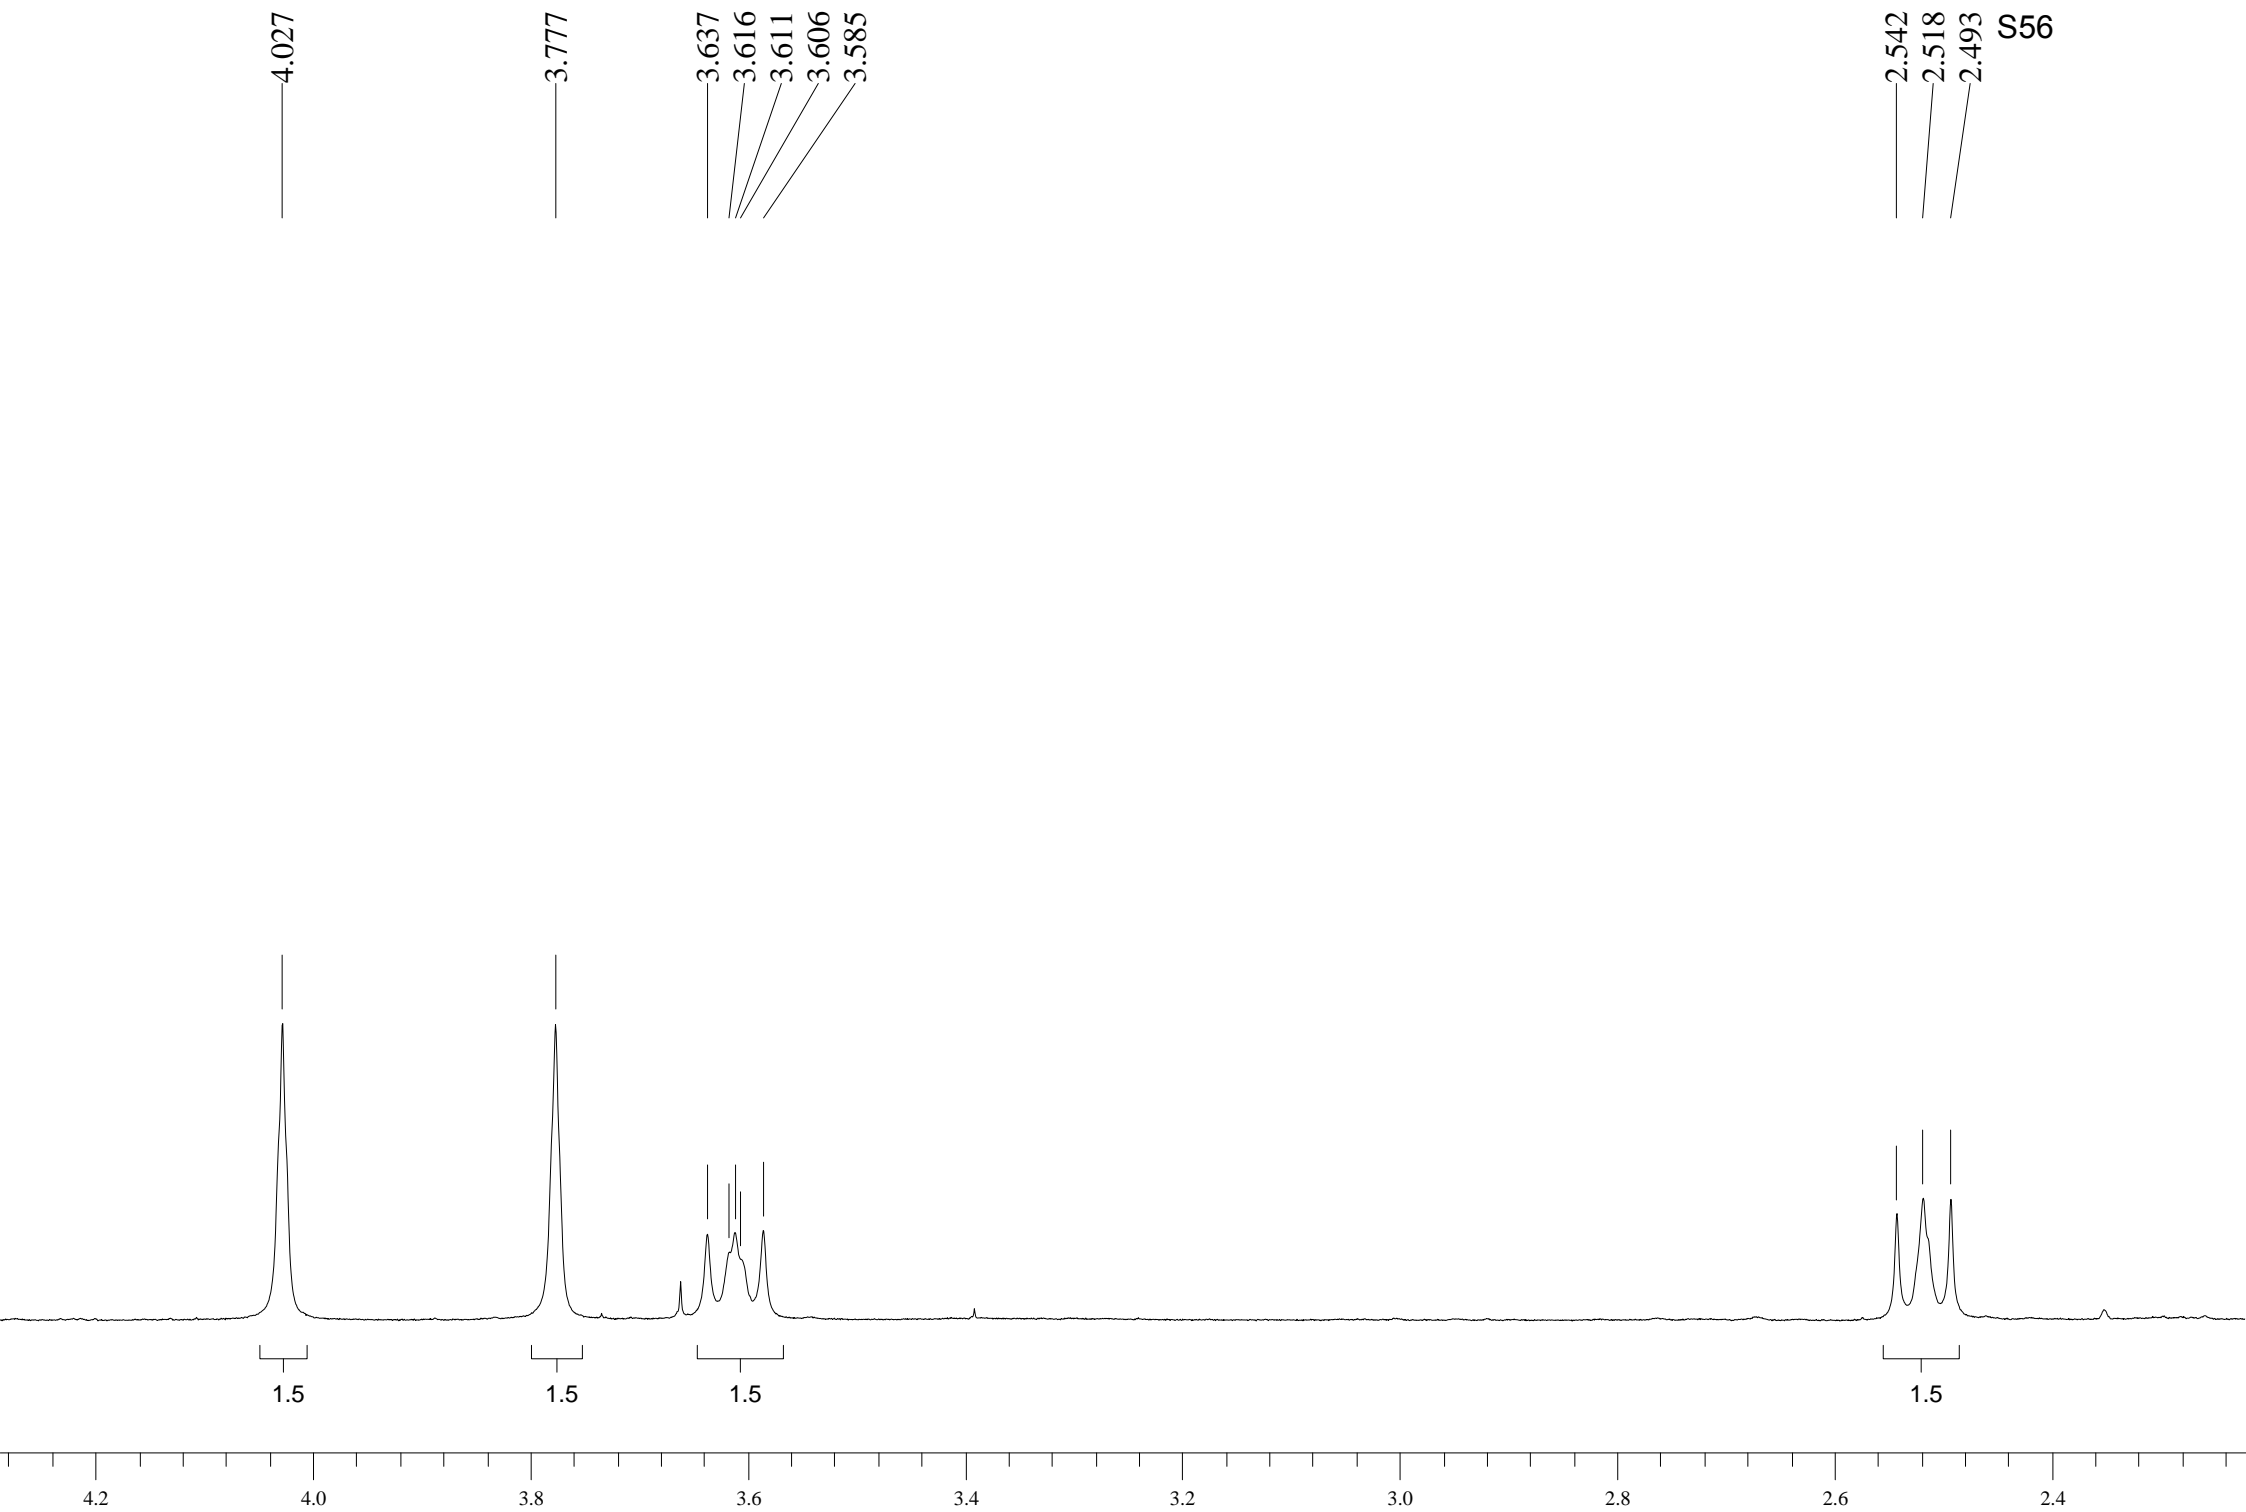



8.029  
8.027  
8.024  
8.022  
8.004  
8.001  
7.999  
7.997  
7.965  
7.963  
7.961  
7.959  
7.940  
7.939  
7.935  
7.934

7.672  
7.667  
7.647  
7.642  
7.622  
7.617  
7.592  
7.587  
7.566  
7.562  
7.542  
7.537  
7.525

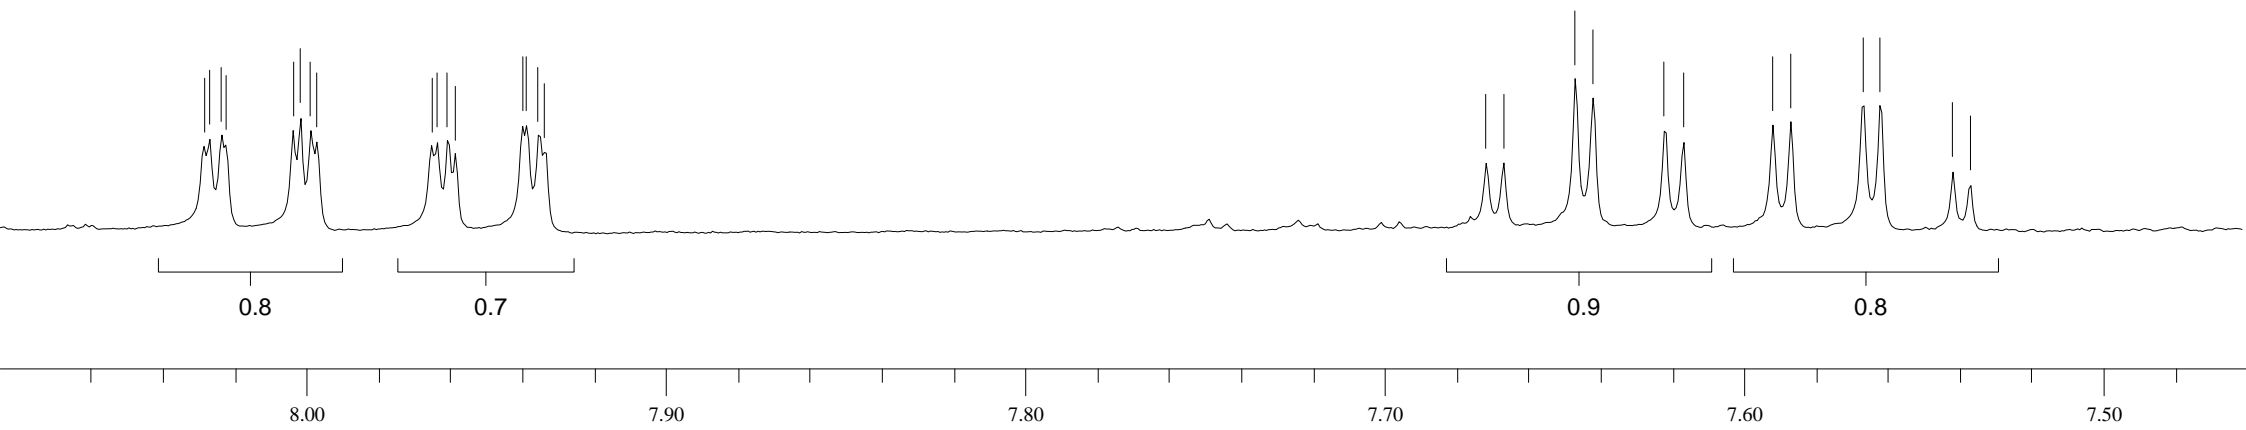

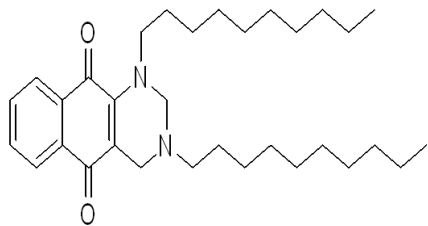

22

181.683  
180.335

146.063

133.265  
132.254  
131.609  
131.283  
125.643  
124.705  
113.125

70.638

53.034  
51.558  
47.997

31.446  
29.233  
29.170  
29.112  
29.086  
28.999  
28.881  
27.351  
26.917  
26.507  
22.241  
13.666

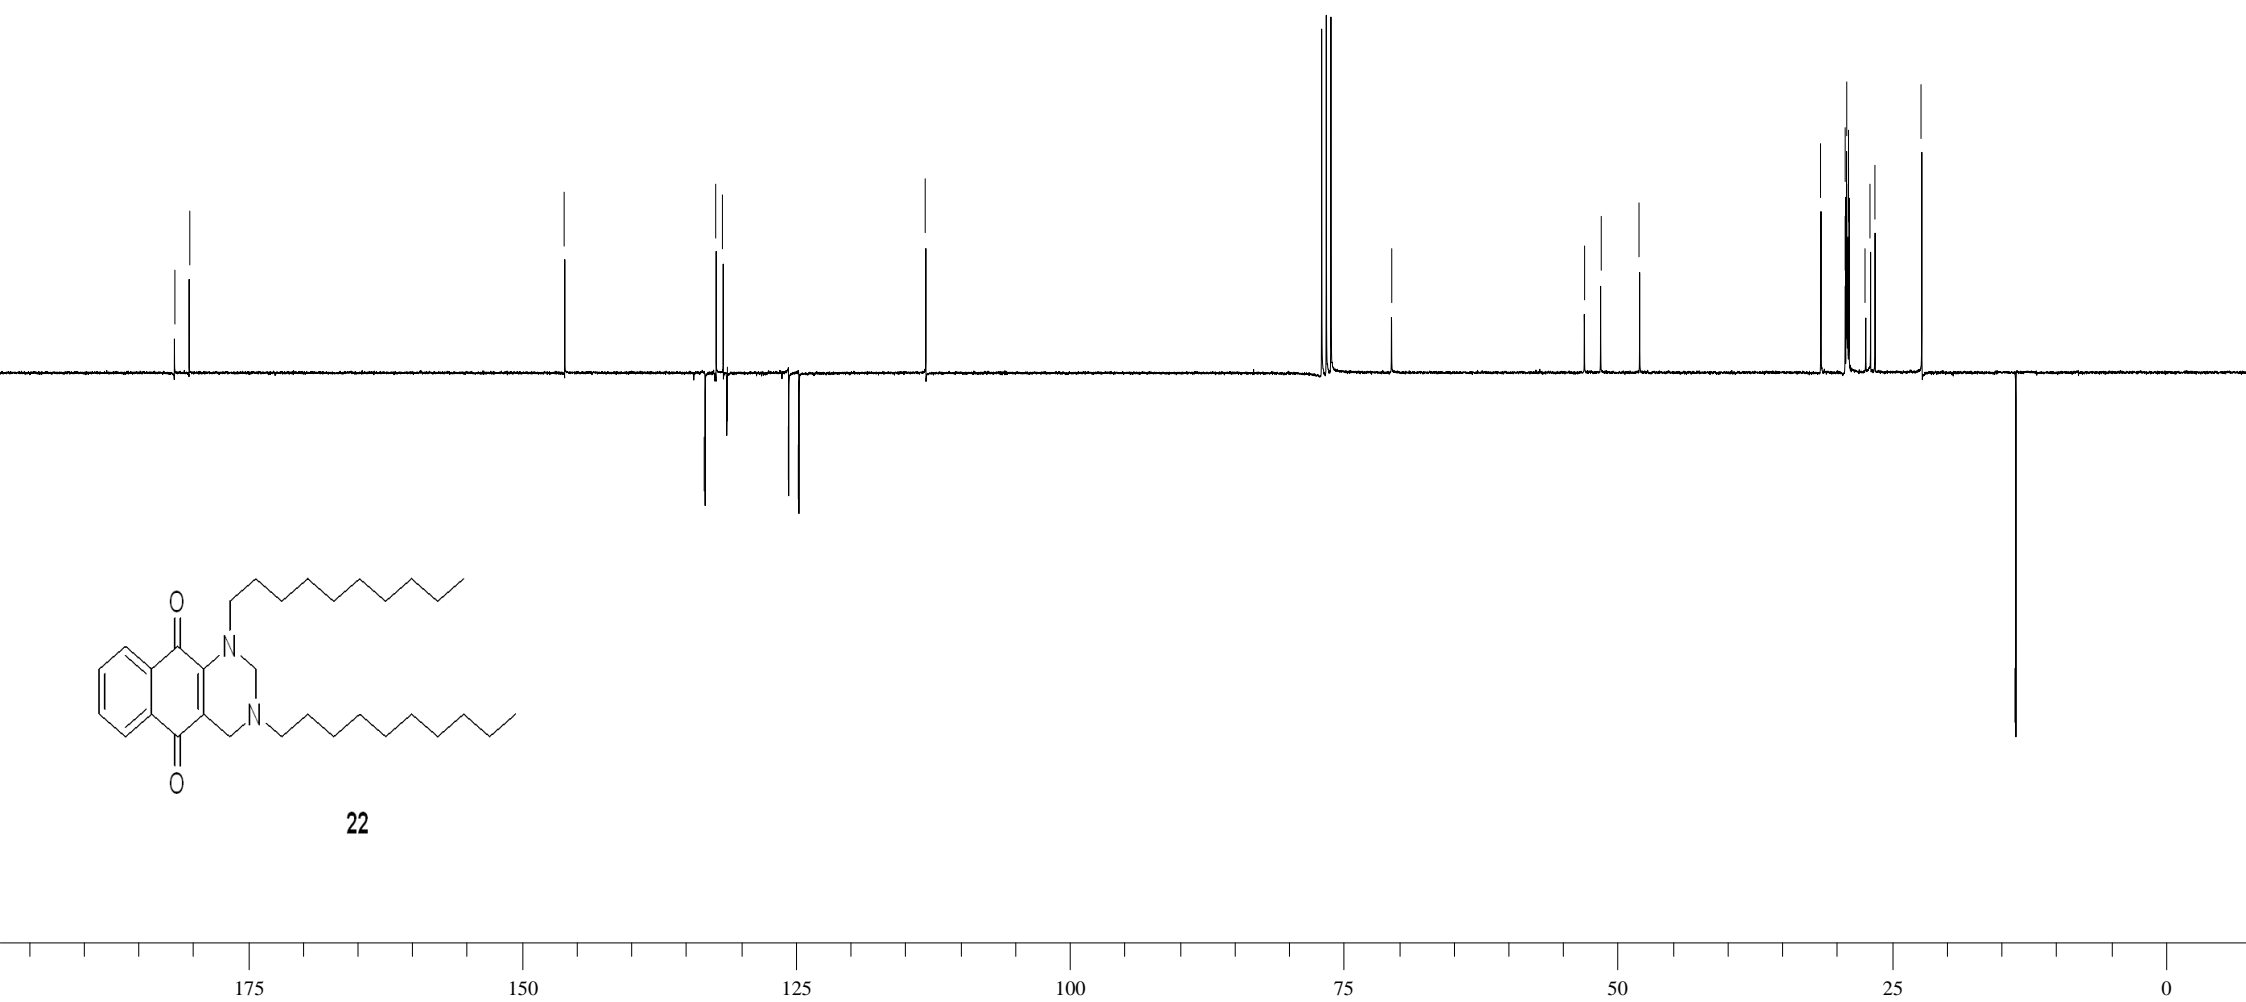

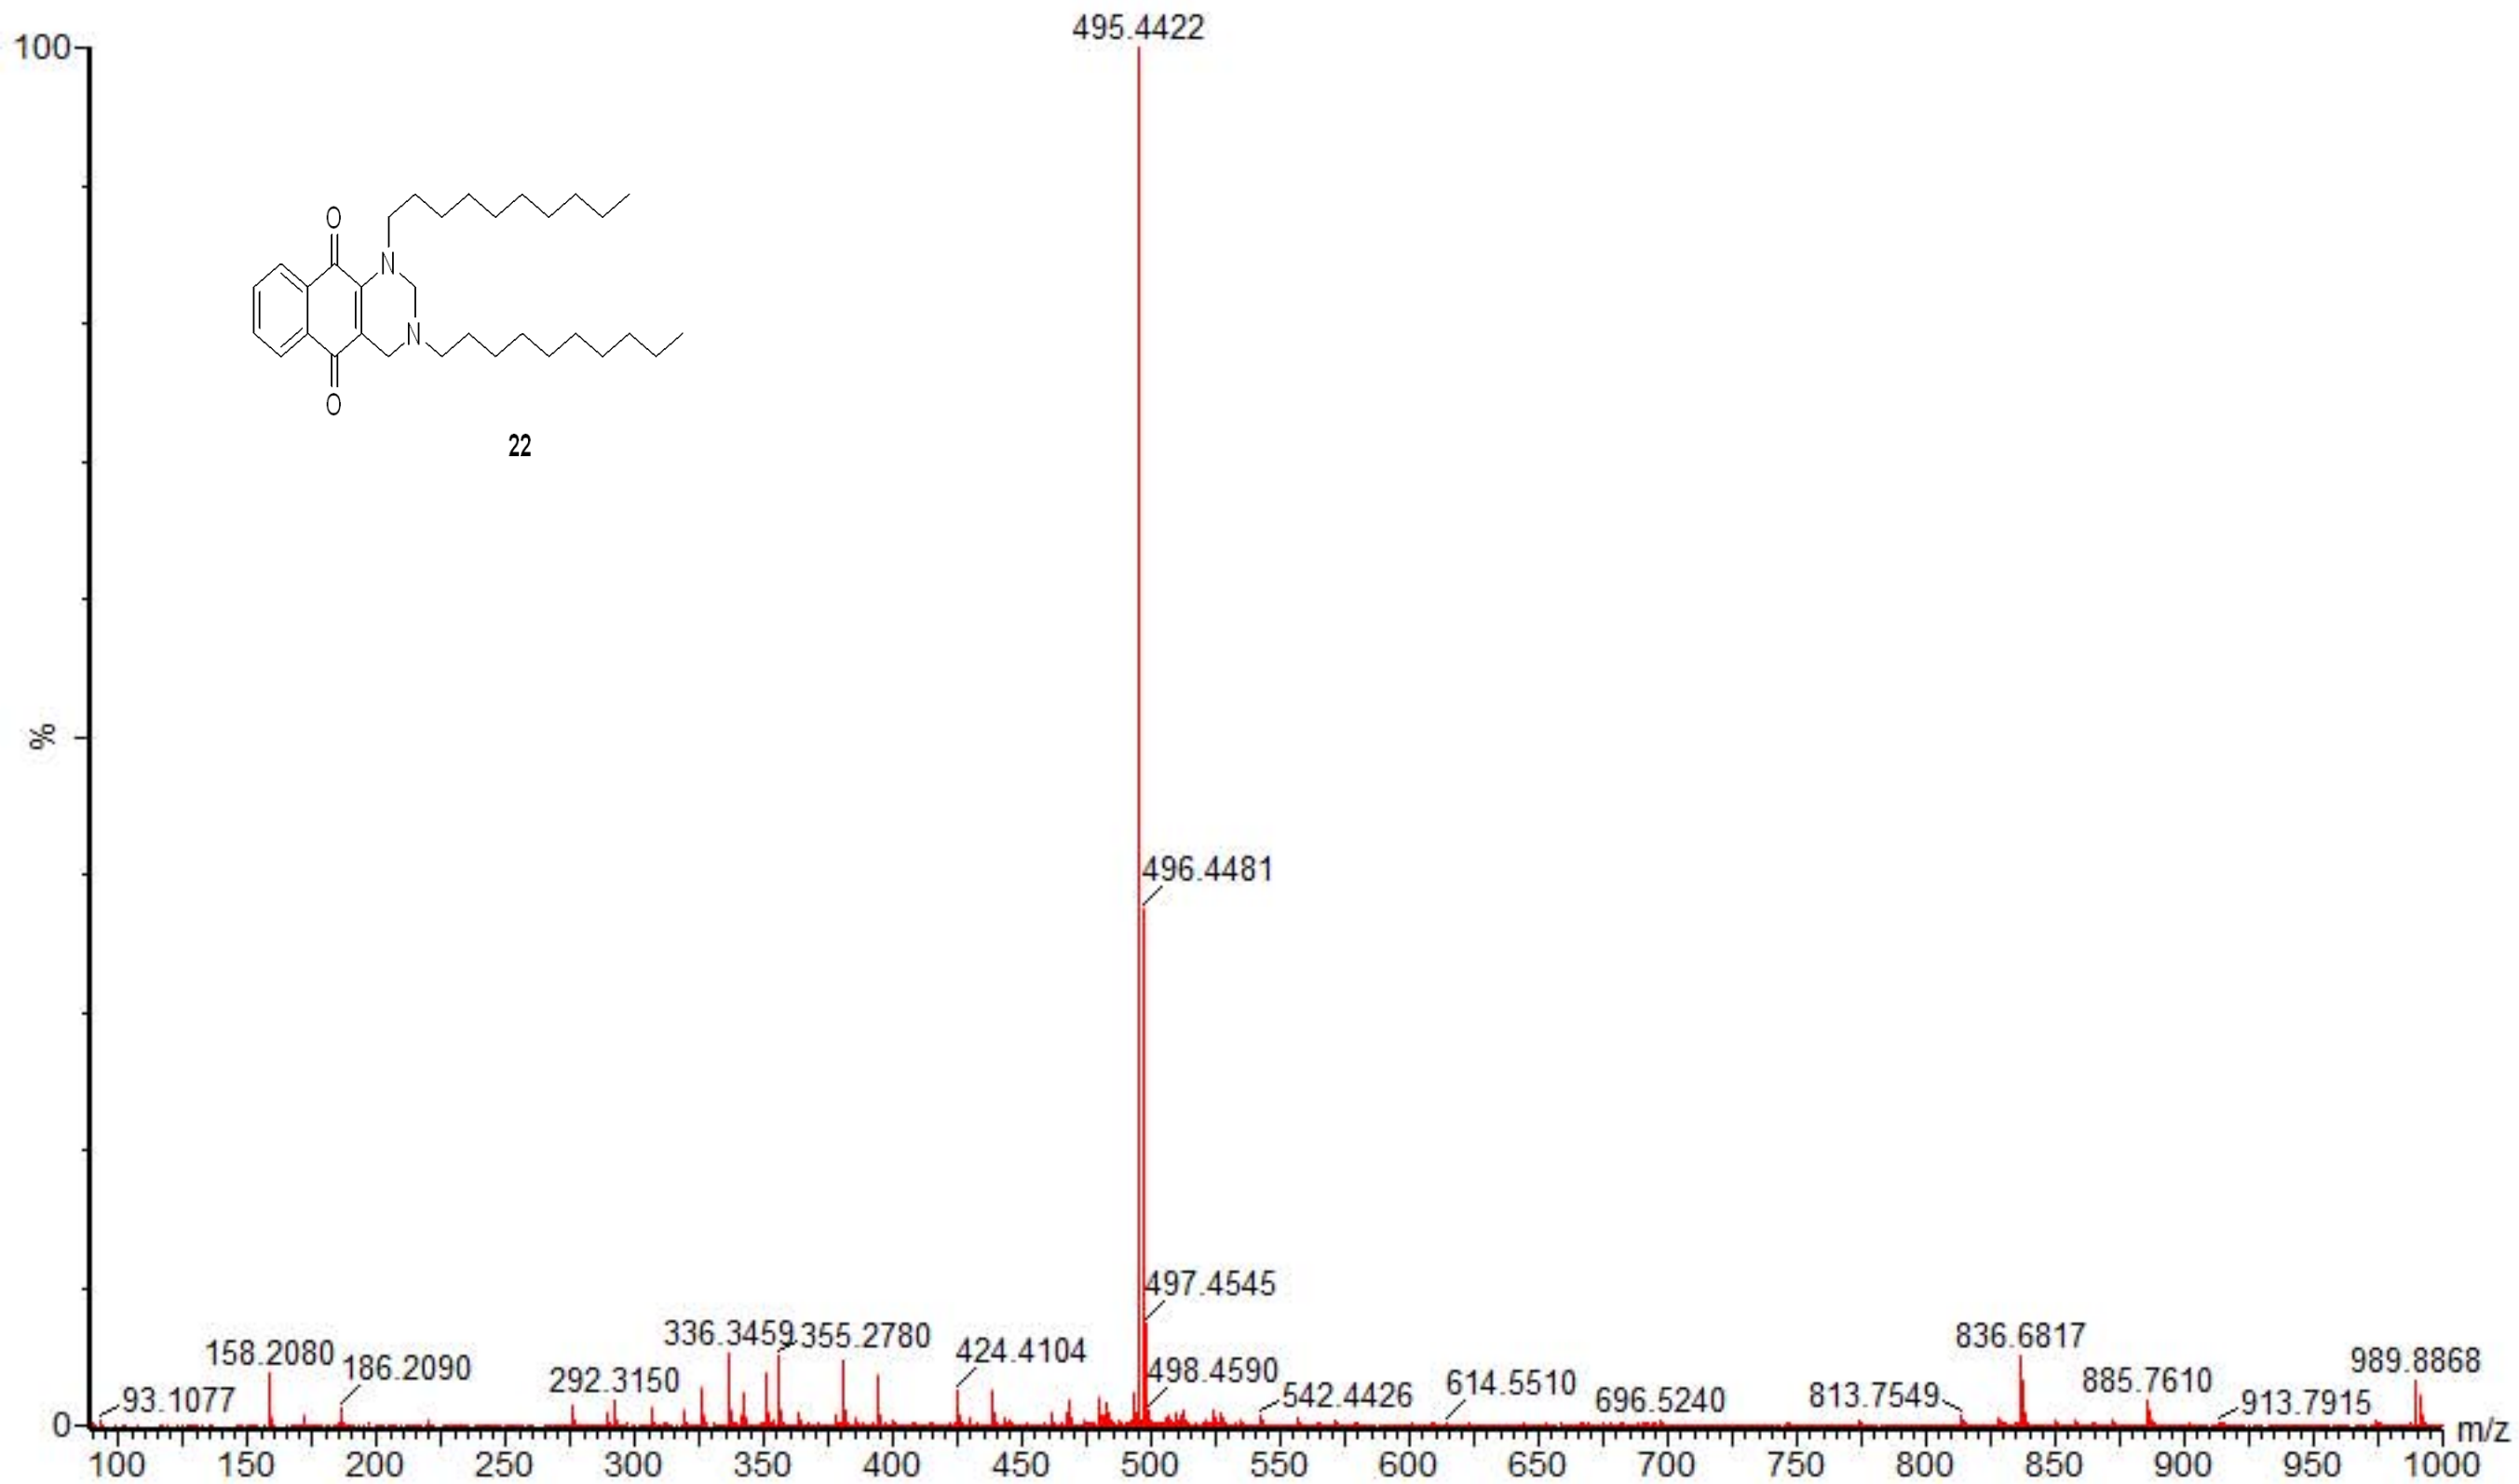

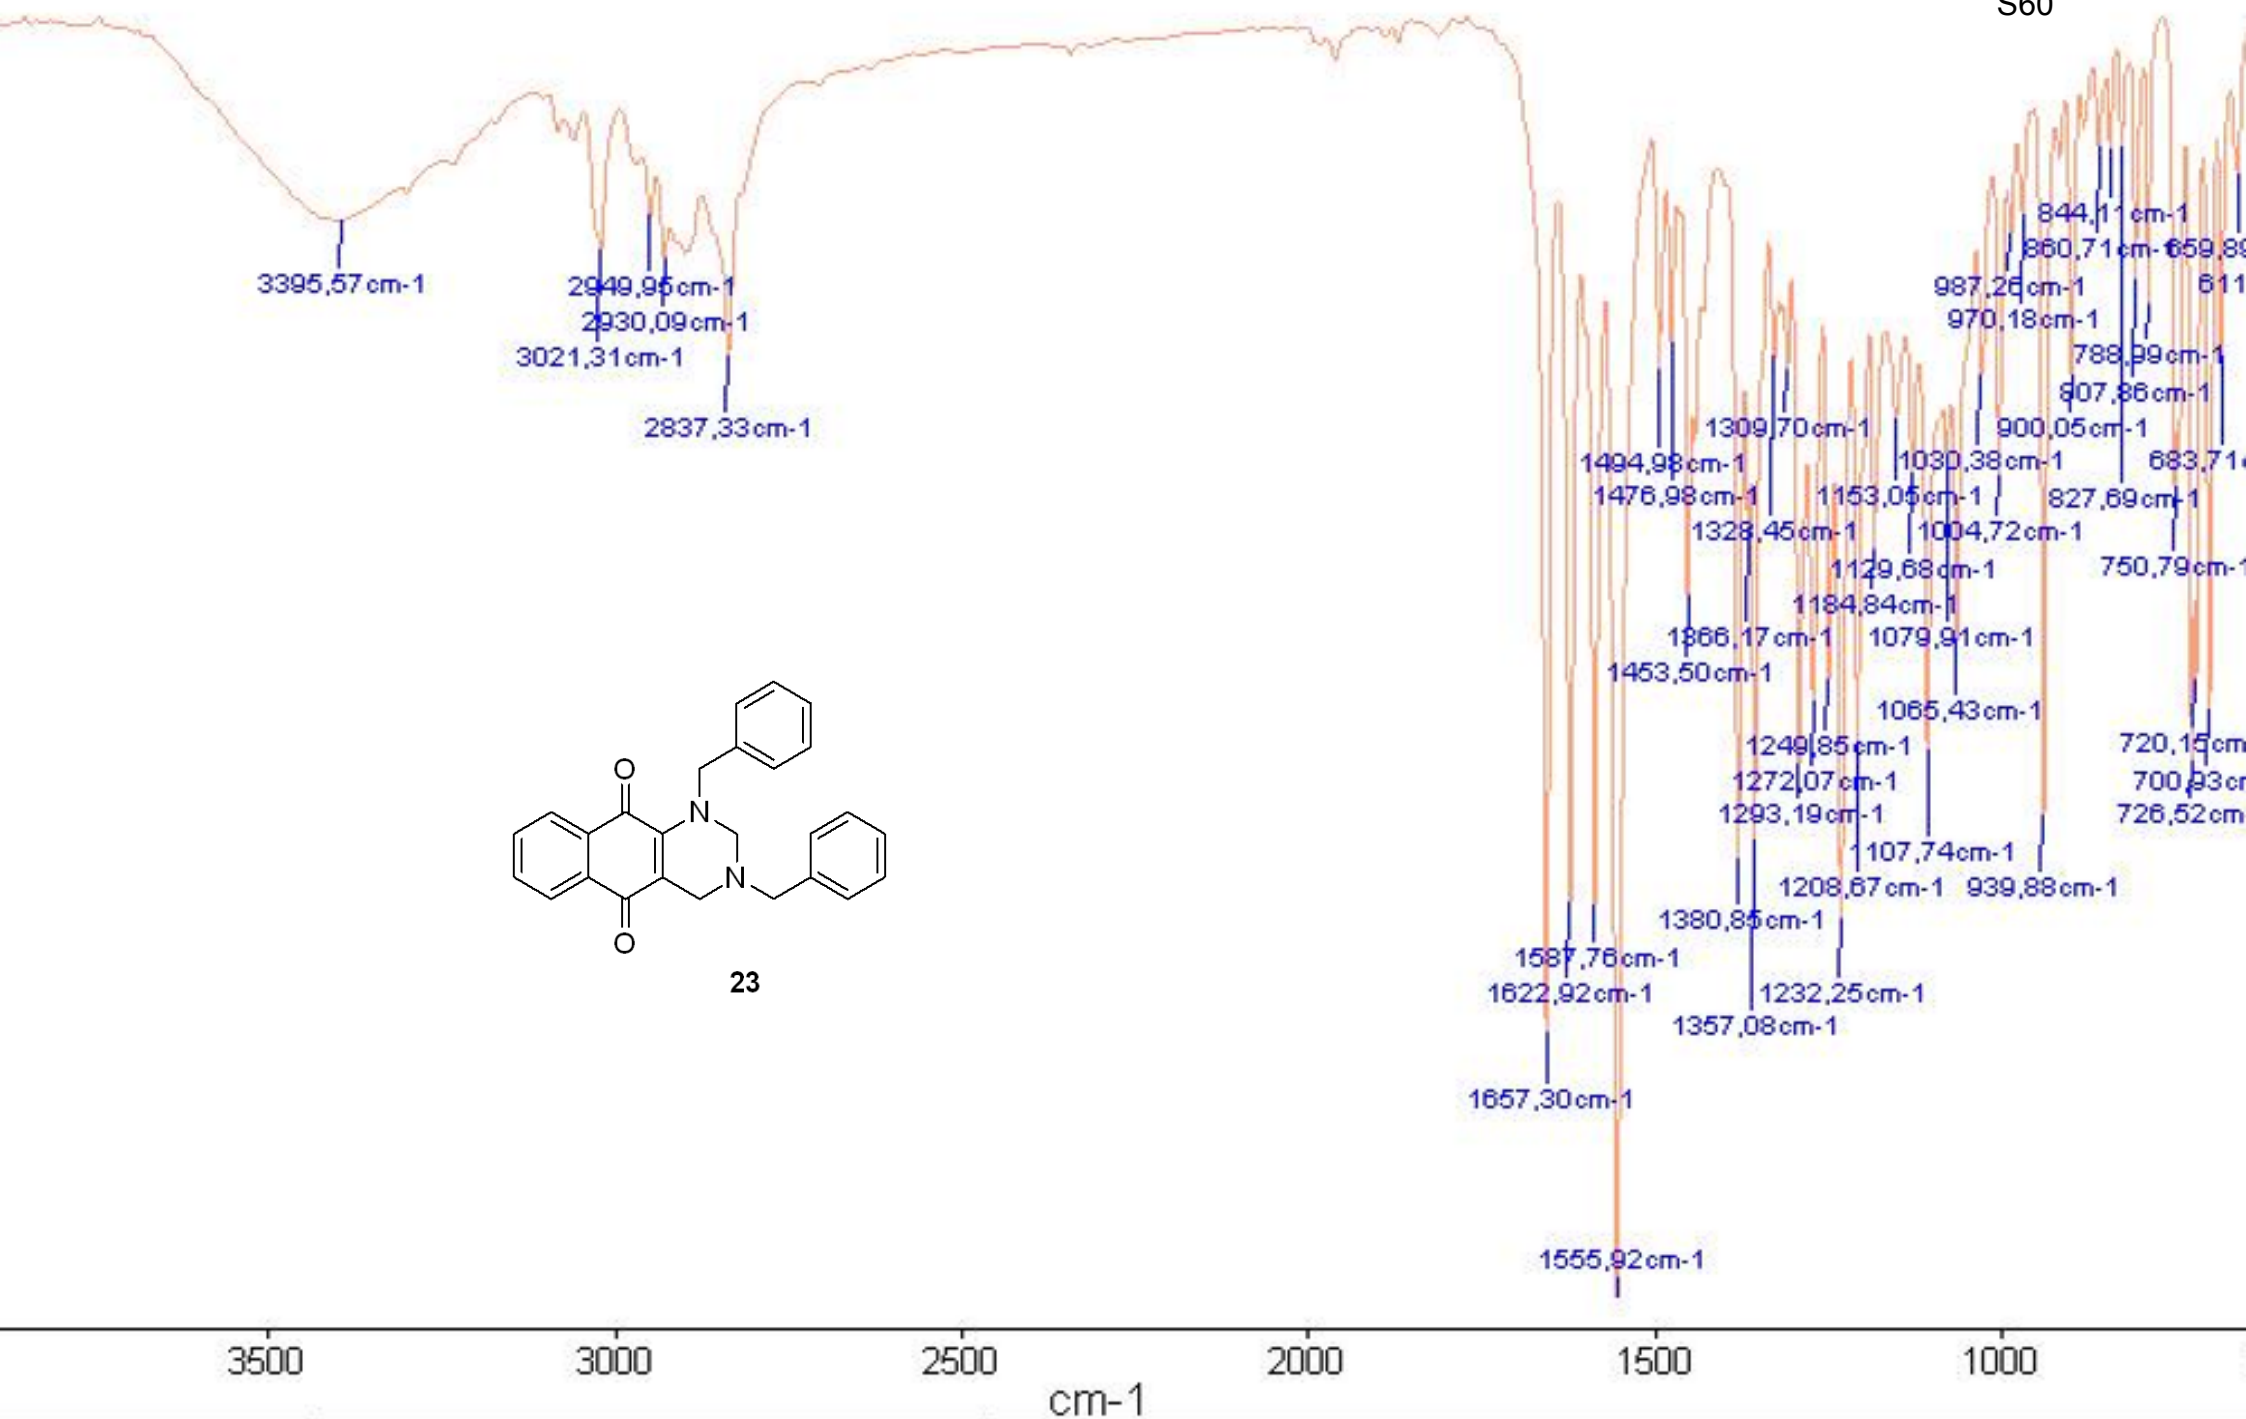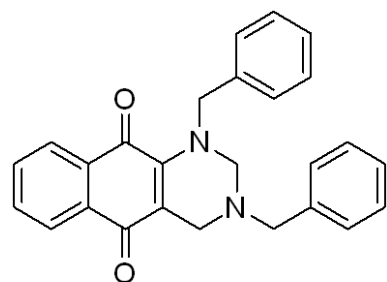

23

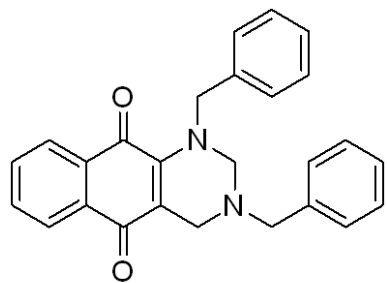

23

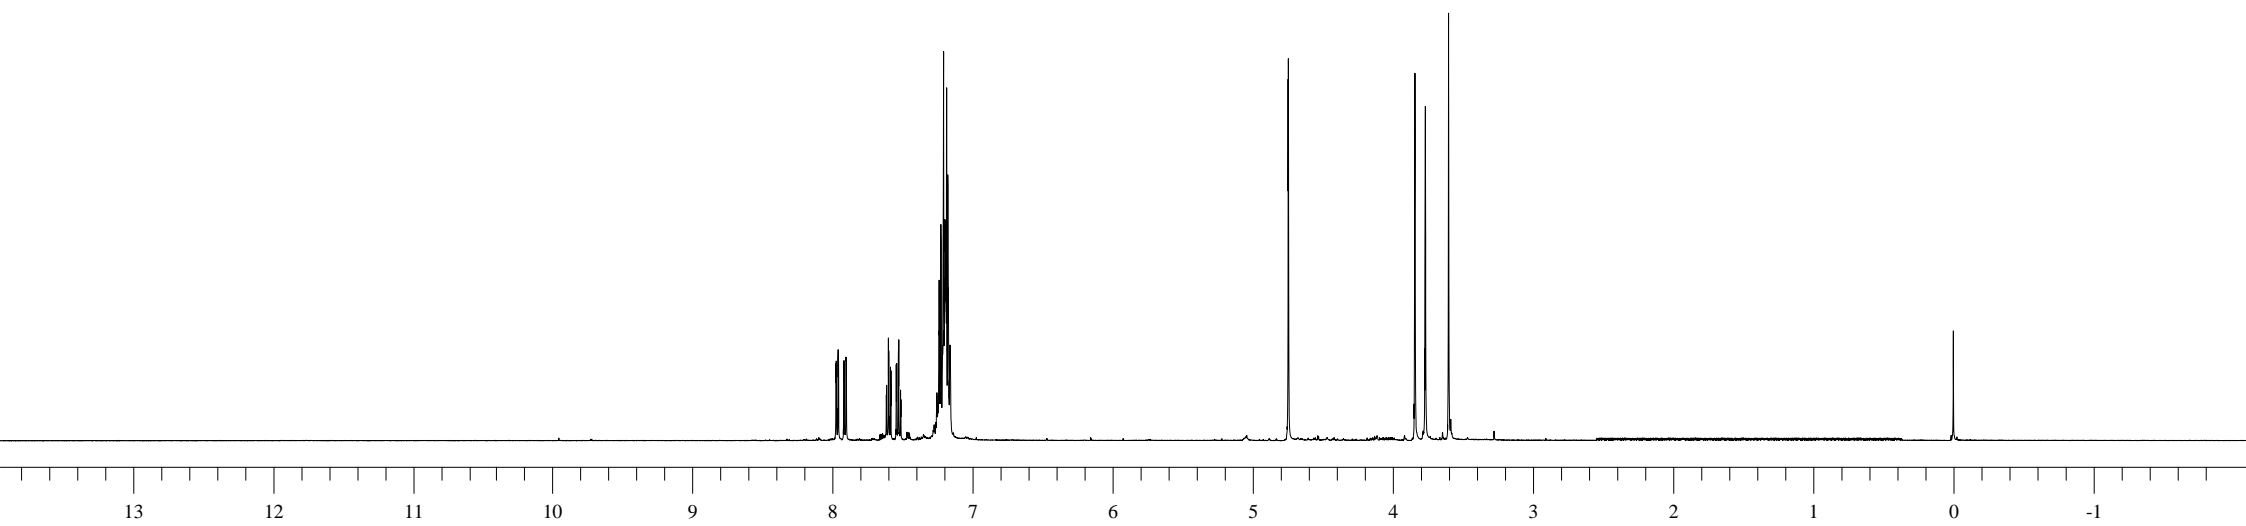

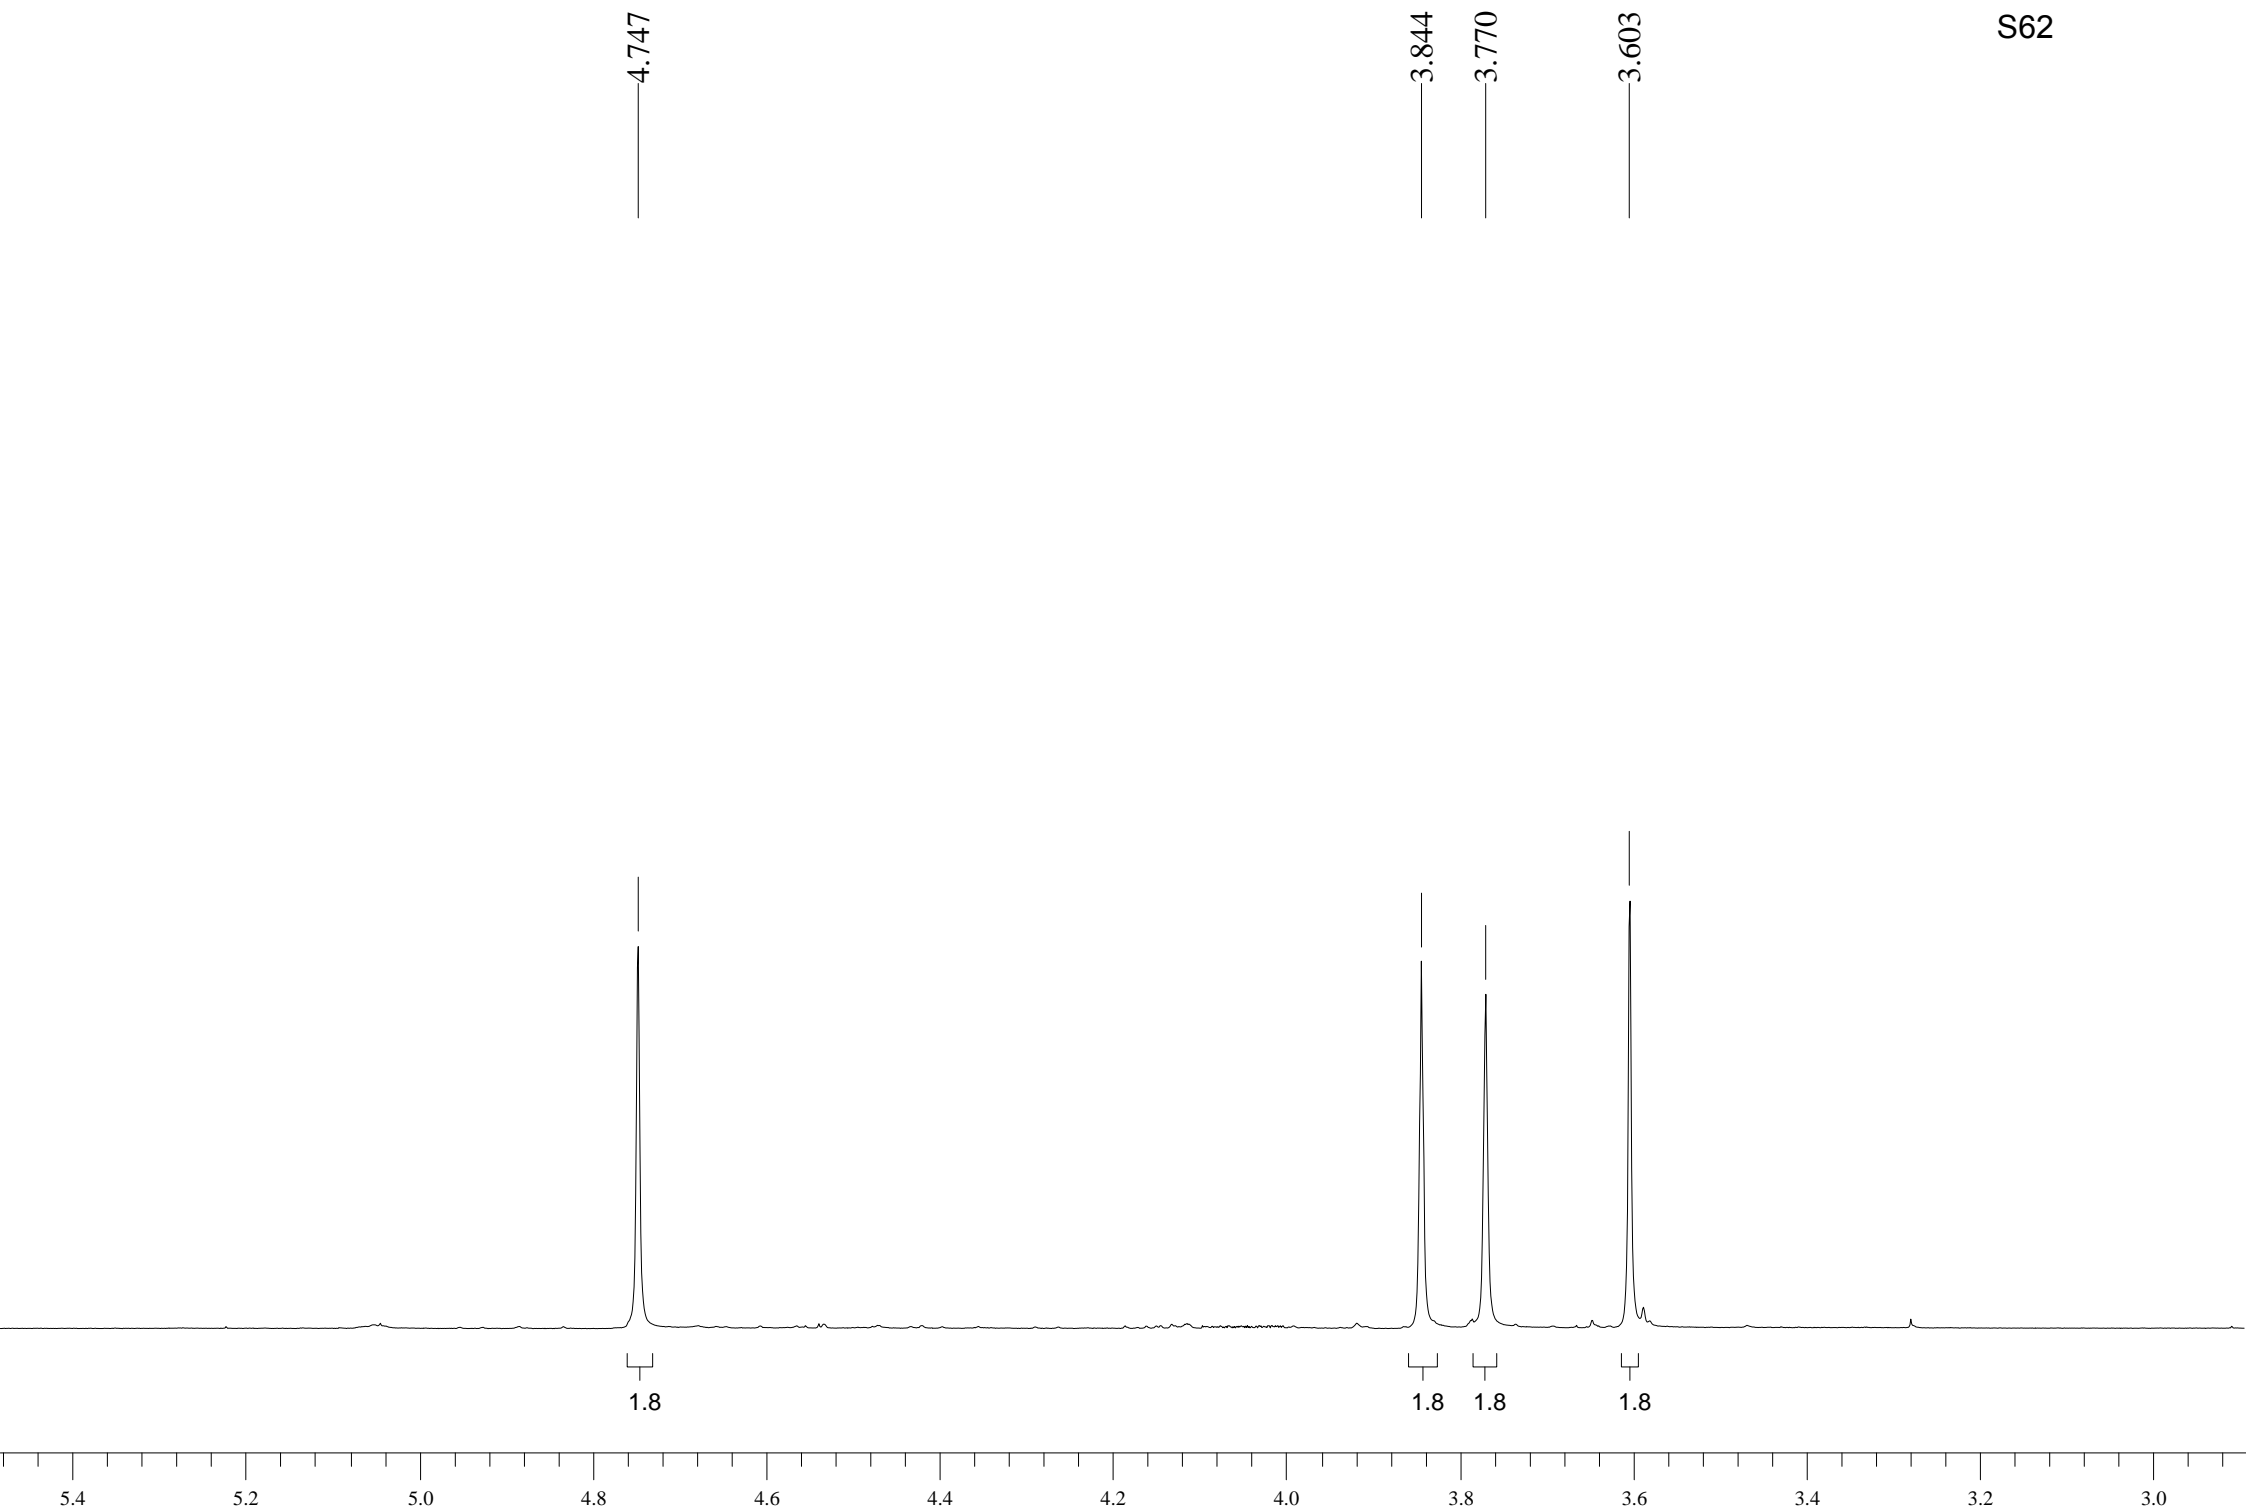

7.977  
7.975  
7.961  
7.959  
7.920  
7.918  
7.905  
7.902

7.618  
7.615  
7.602  
7.600  
7.588  
7.585  
7.547  
7.544  
7.531  
7.529  
7.516  
7.513

7.265  
7.257  
7.249  
7.240  
7.234  
7.228  
7.209  
7.200  
7.198  
7.195  
7.192  
7.188  
7.185  
7.178  
7.175  
7.163  
7.159

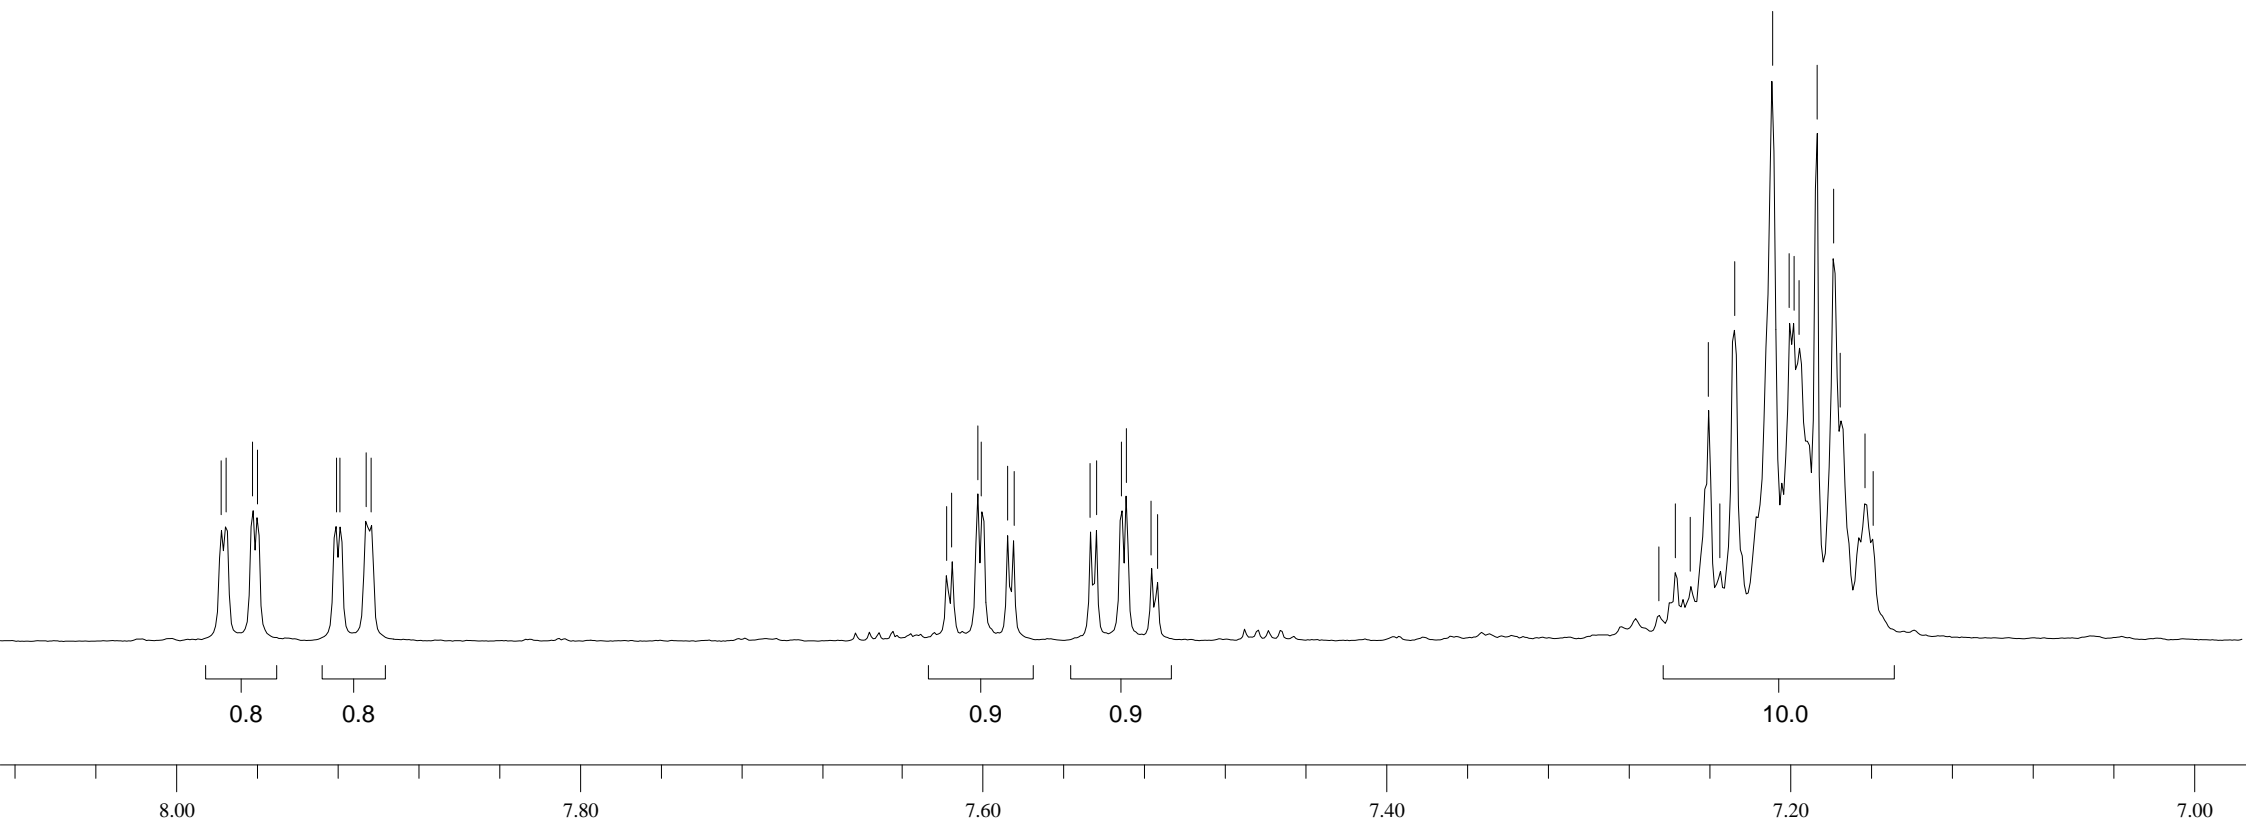

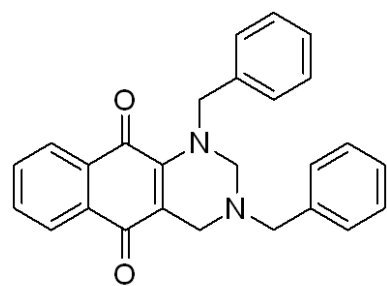

23

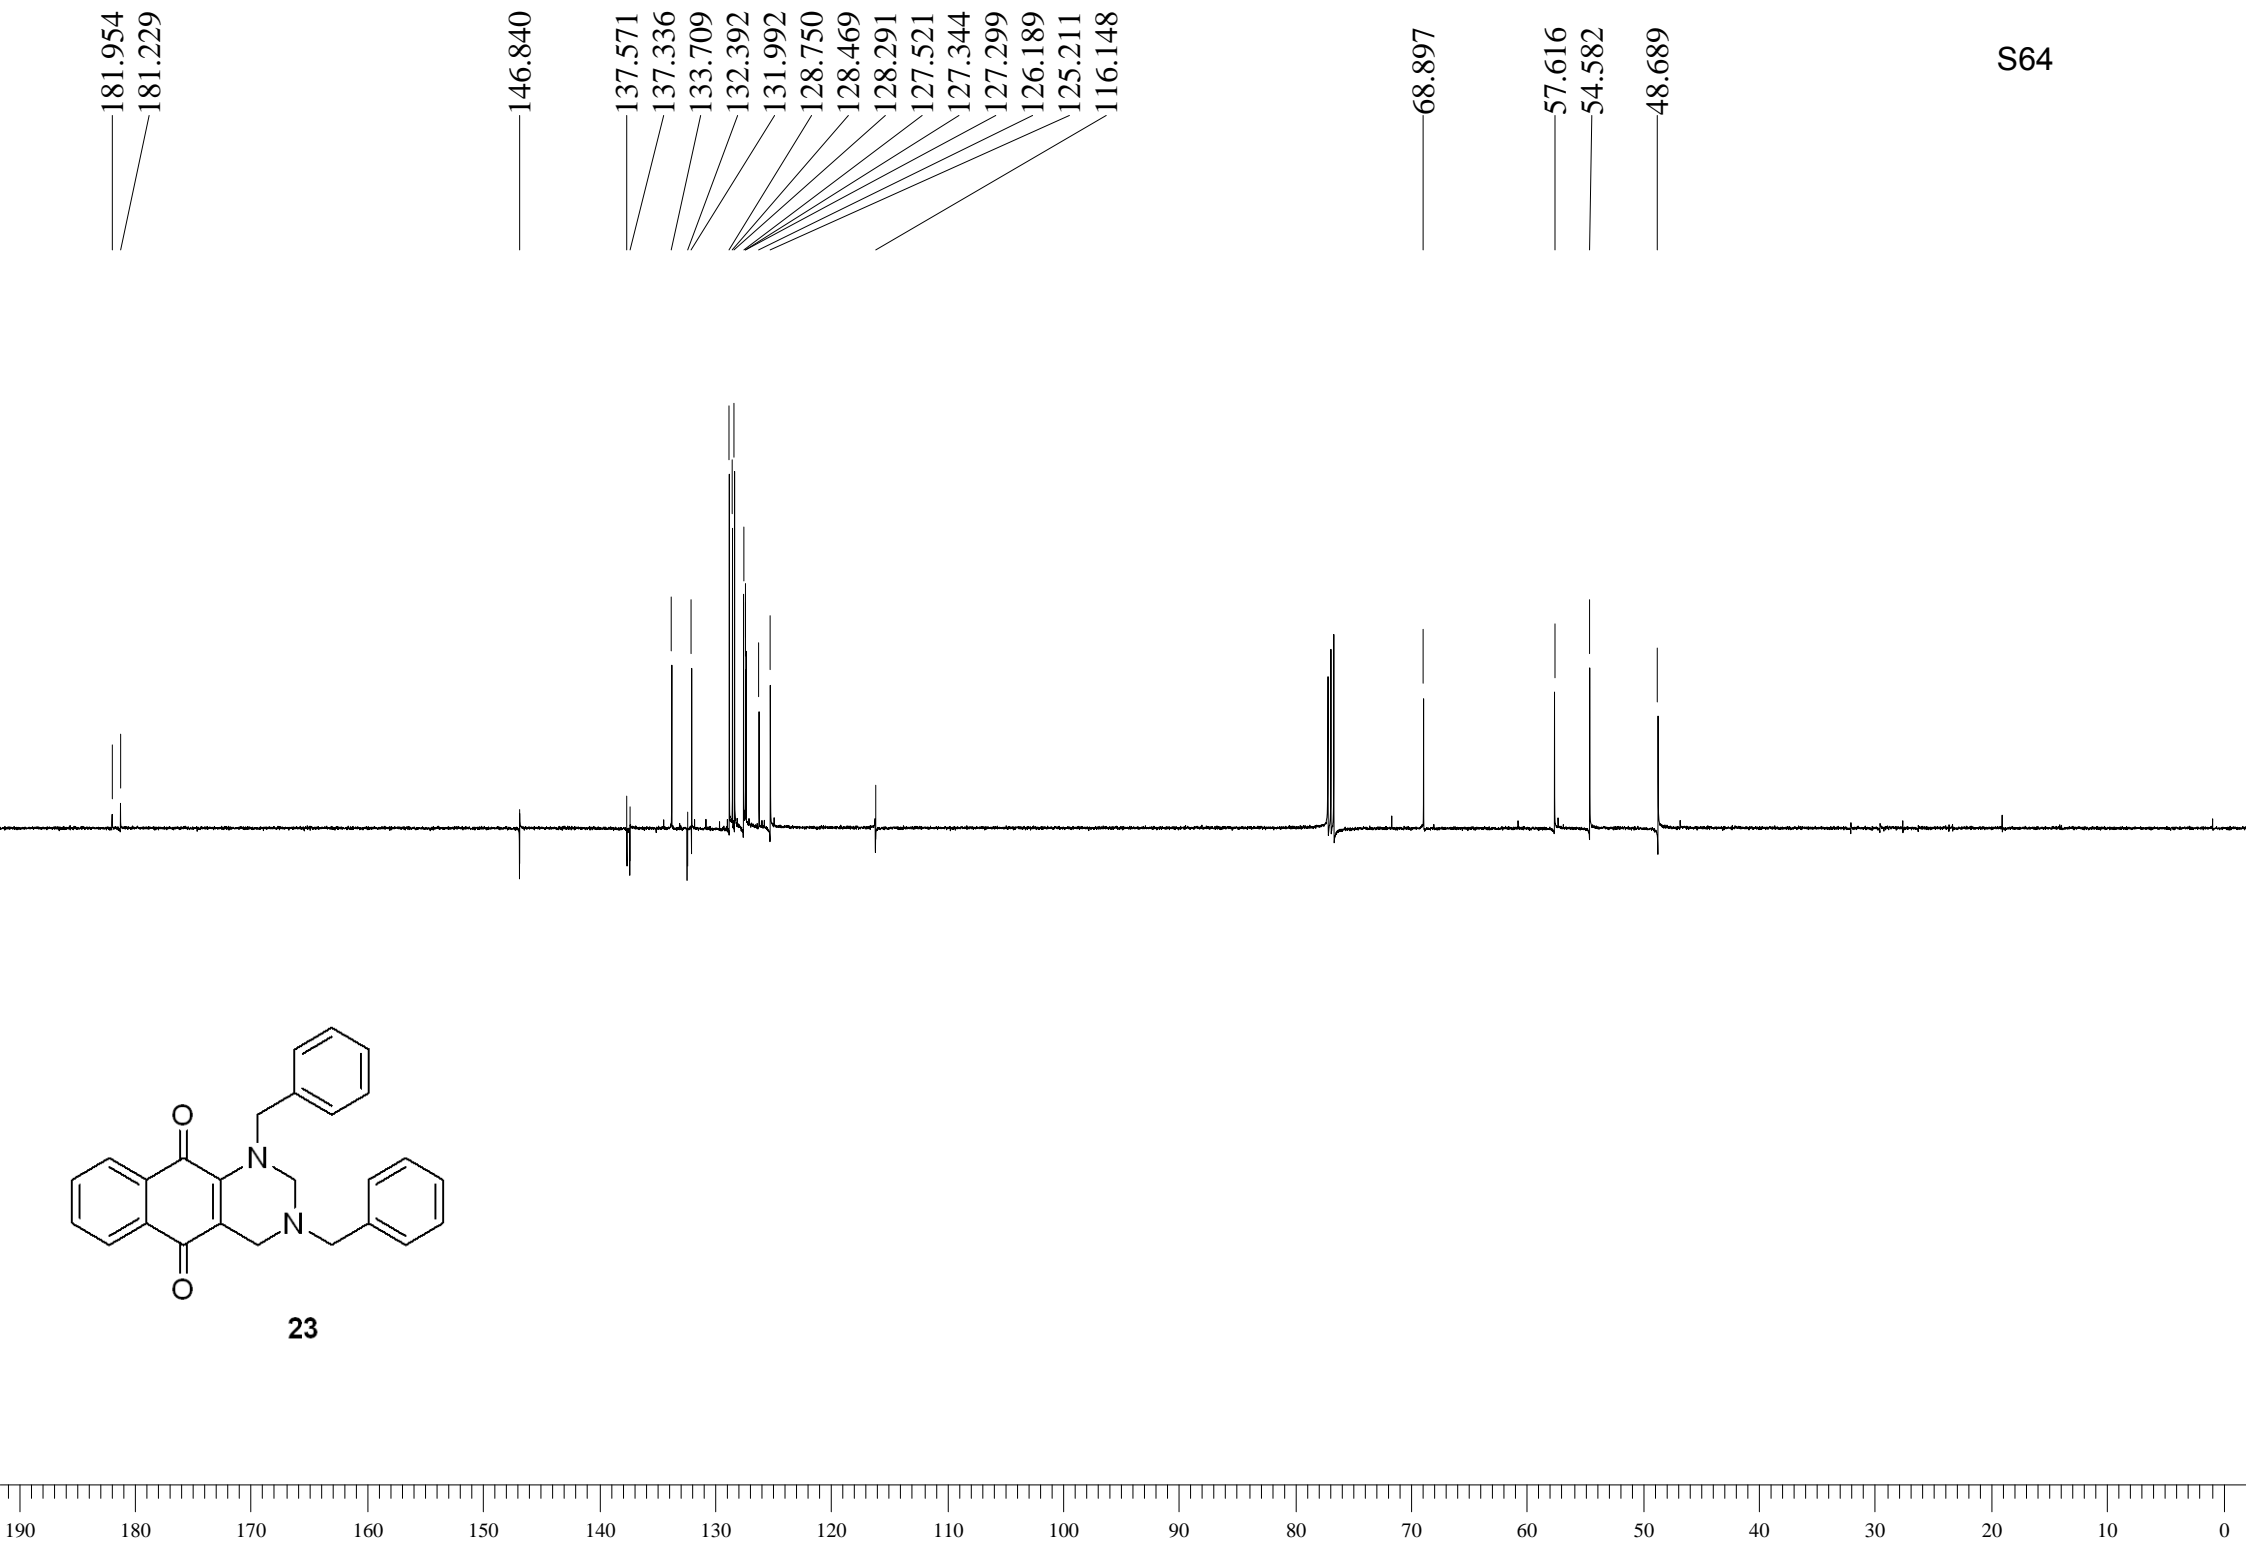



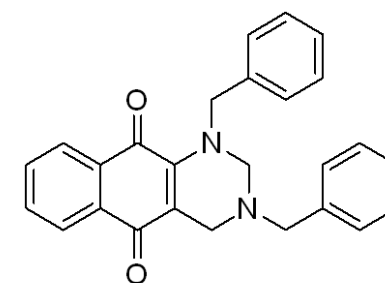

23

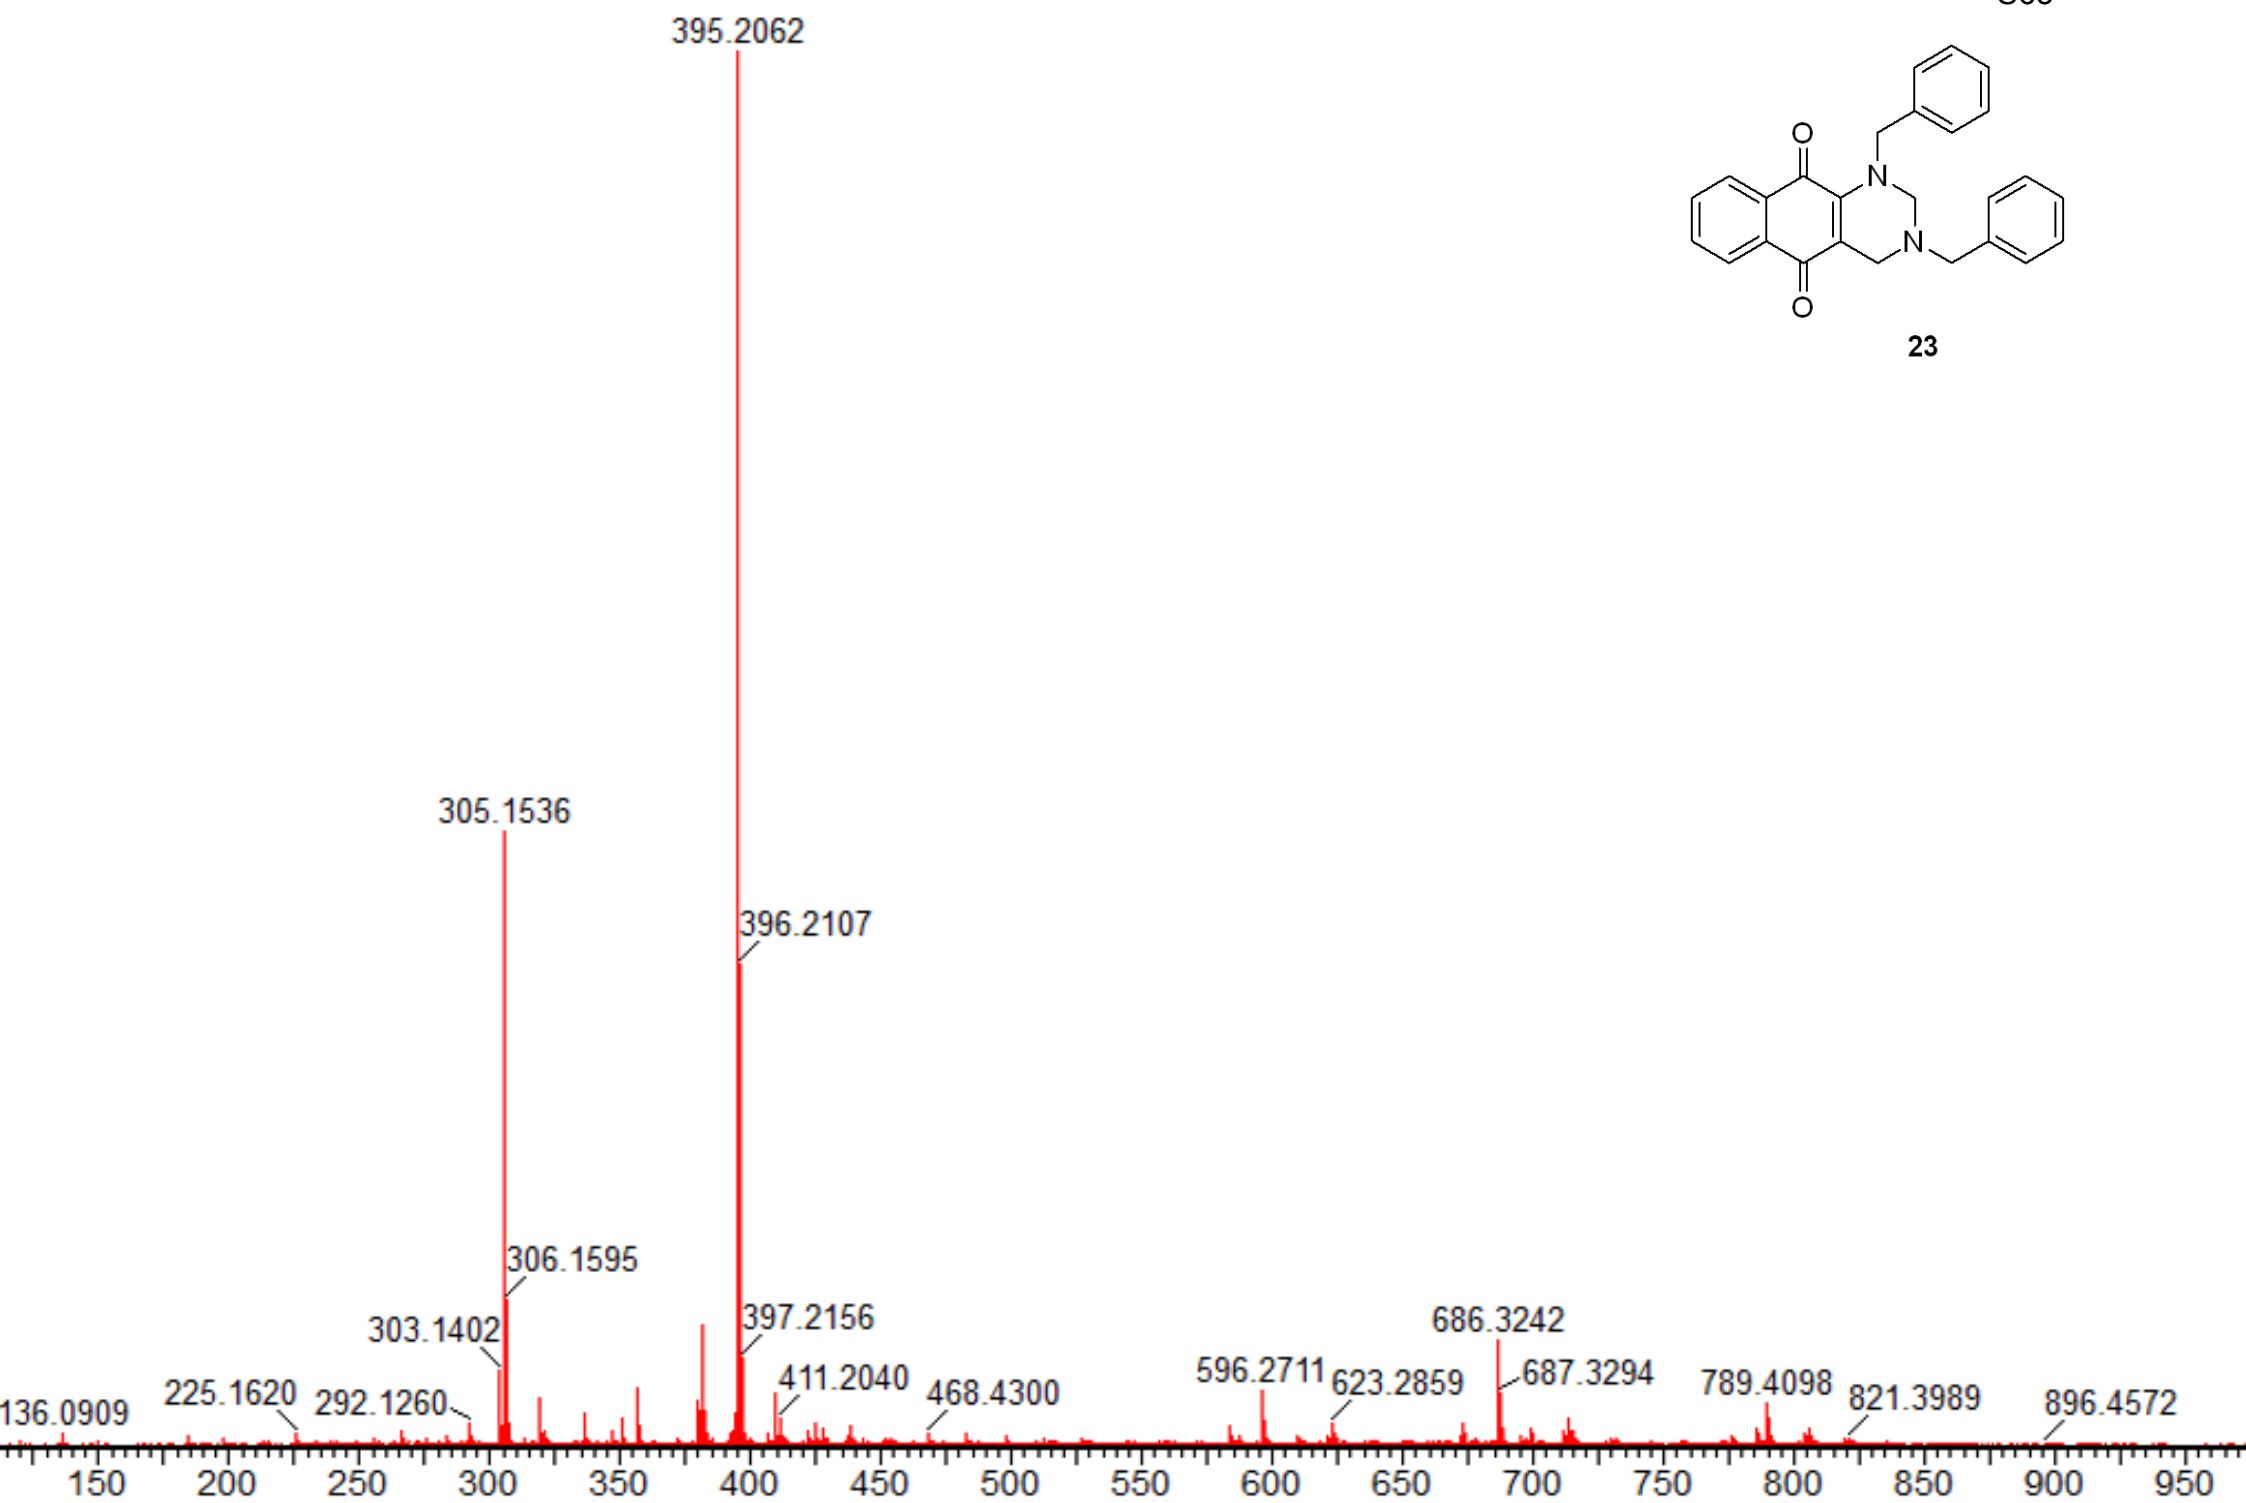

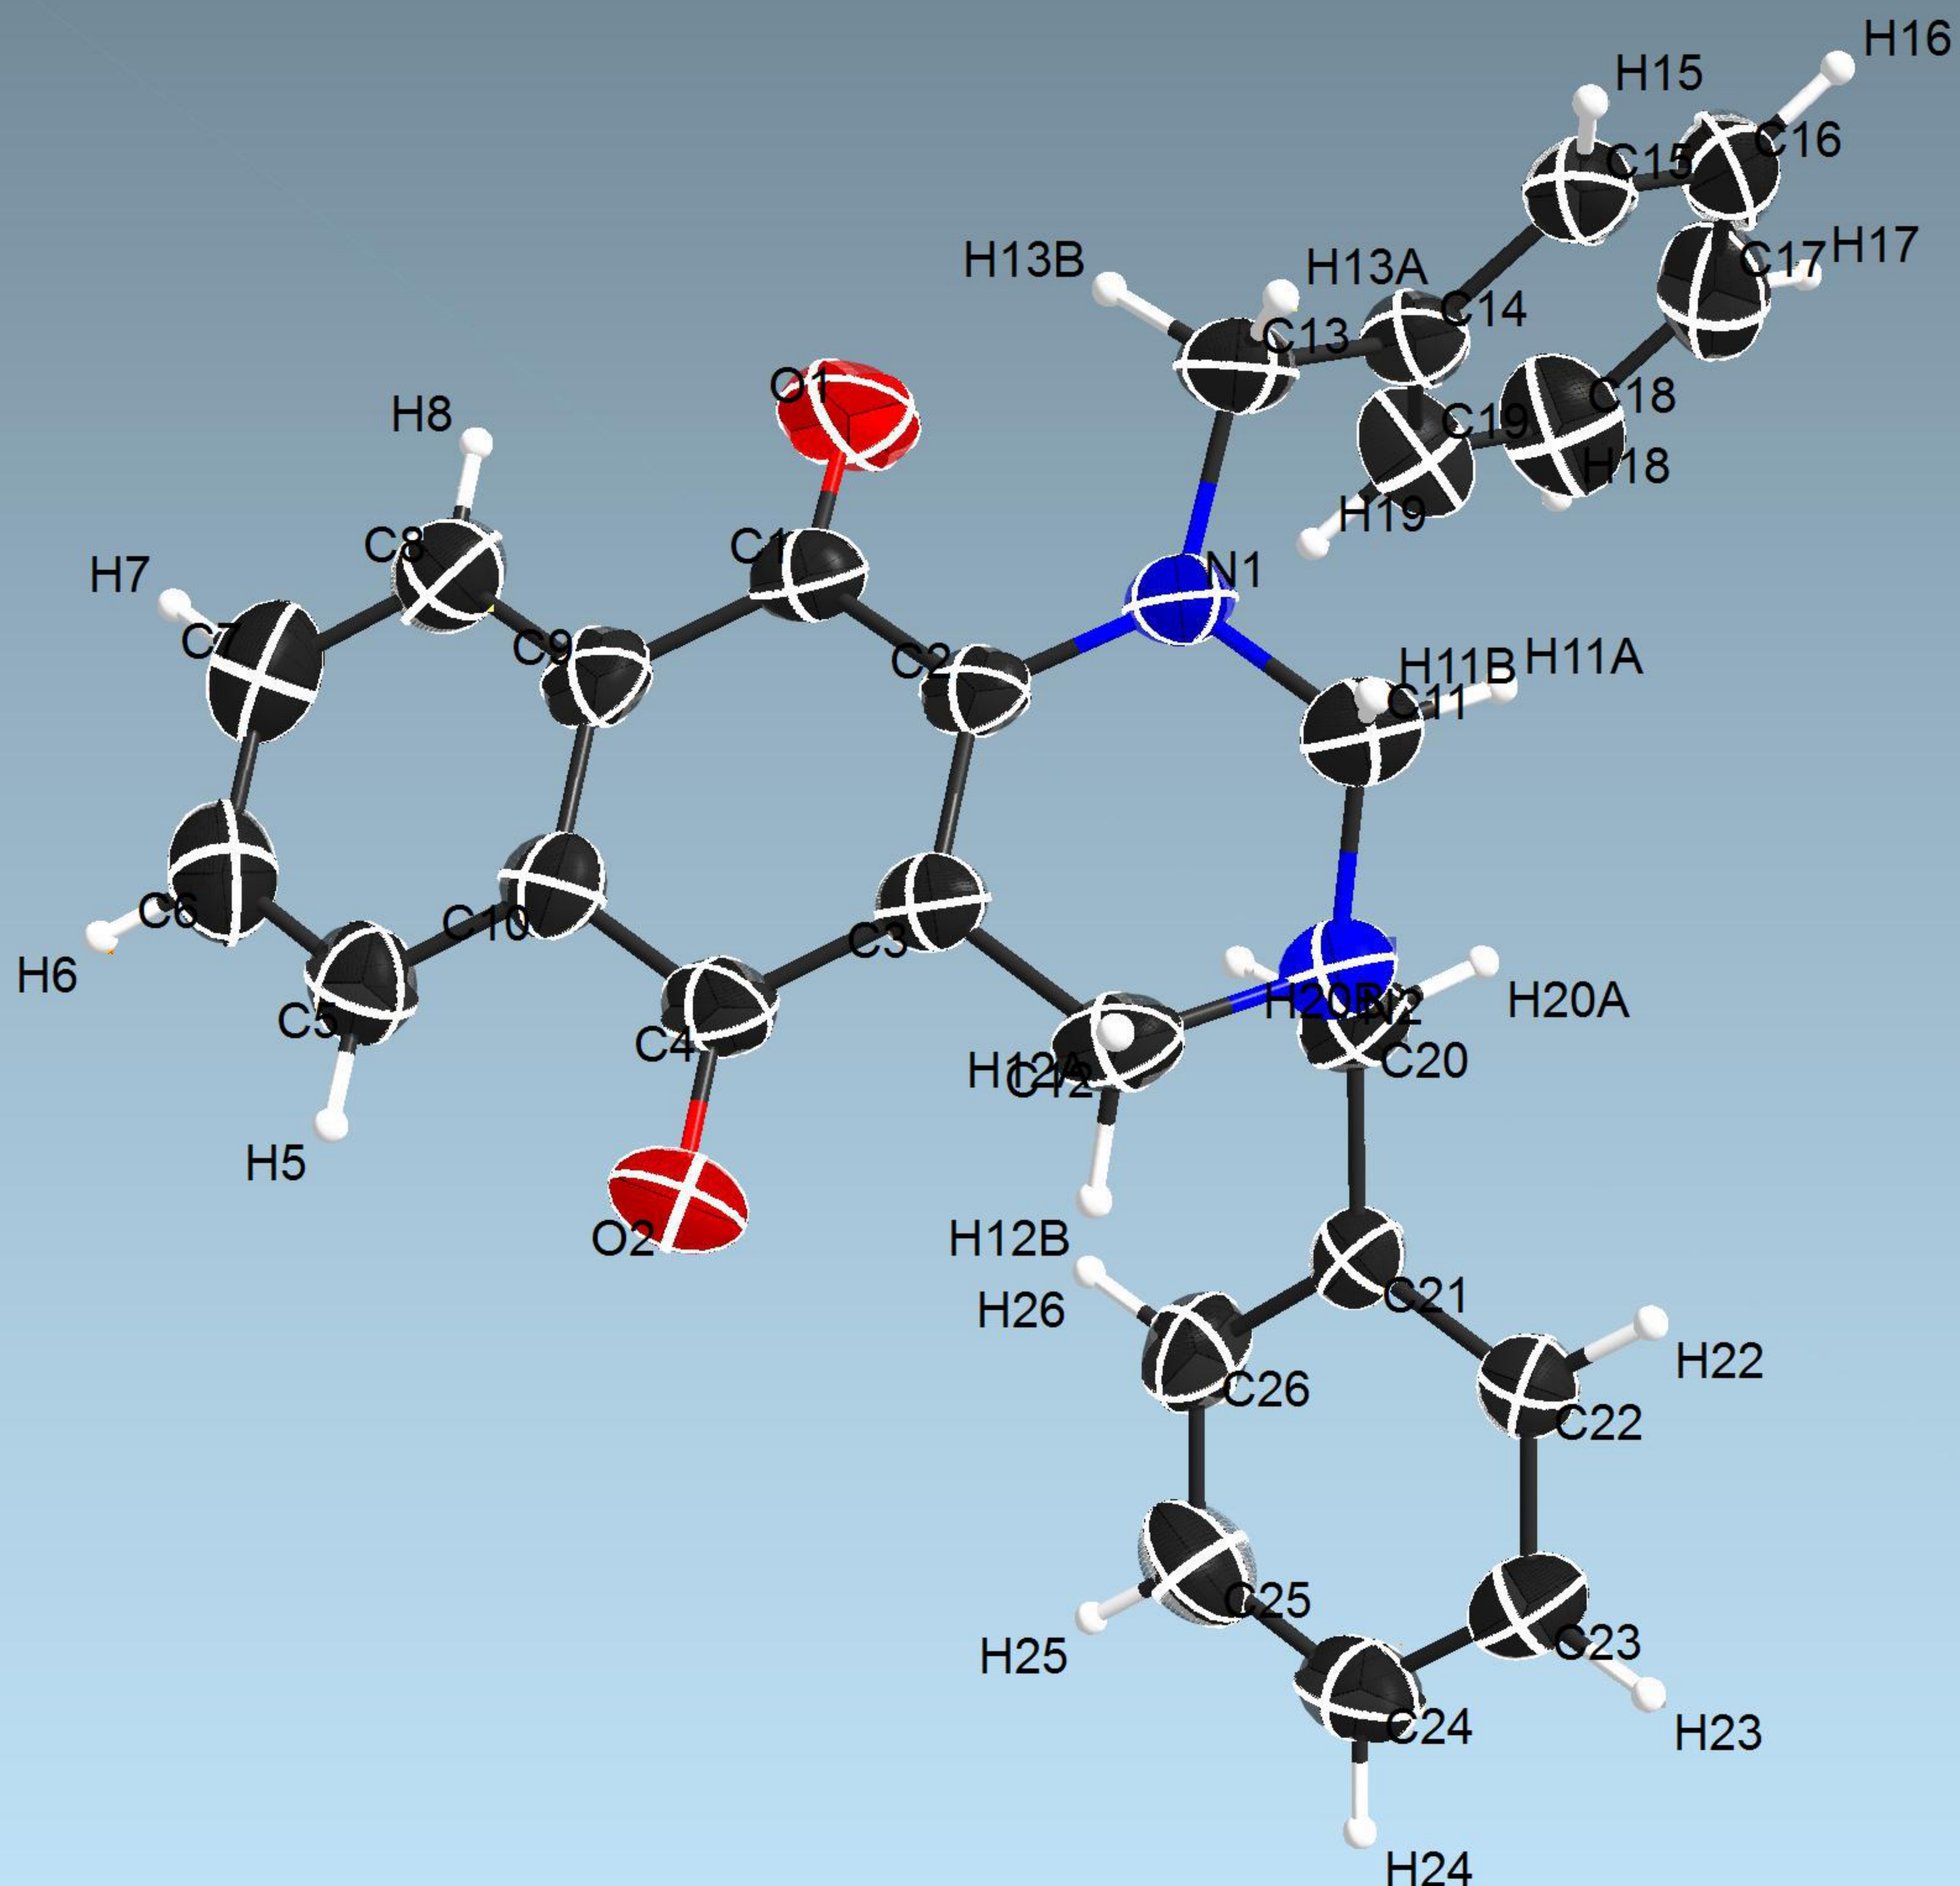

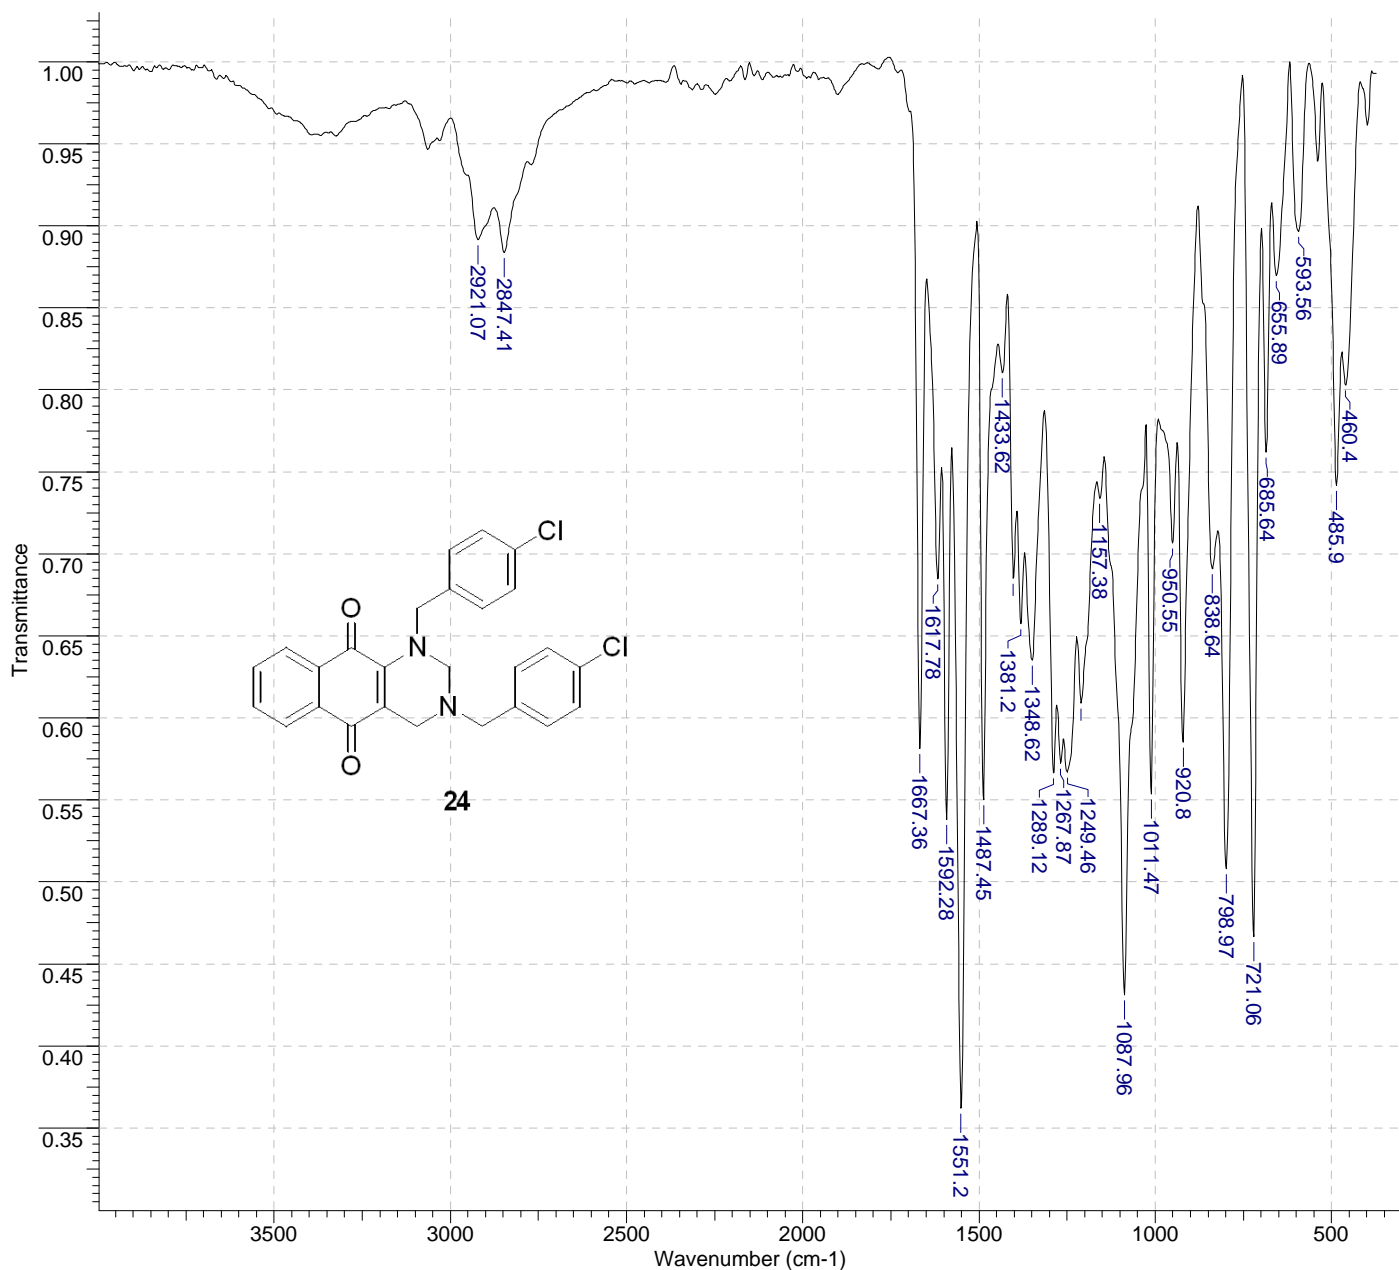

| No | cm-1    | T     | FWHH  | Asym | Intensity | No | cm-1    | T     | FWHH  | Asym | Intensity |
|----|---------|-------|-------|------|-----------|----|---------|-------|-------|------|-----------|
| 1  | 460.40  | 0.803 | -     | -    | M         | 15 | 1249.46 | 0.567 | -     | -    | S         |
| 2  | 485.90  | 0.742 | -     | -    | M         | 16 | 1267.87 | 0.572 | -     | -    | S         |
| 3  | 593.56  | 0.897 | -1.00 | 0.00 | W         | 17 | 1289.12 | 0.567 | -     | -    | S         |
| 4  | 655.89  | 0.870 | -     | -    | W         | 18 | 1348.62 | 0.635 | -     | -    | M         |
| 5  | 685.64  | 0.762 | -1.00 | 0.00 | M         | 19 | 1381.20 | 0.657 | -     | -    | M         |
| 6  | 721.06  | 0.467 | -1.00 | 0.00 | S         | 20 | 1402.45 | 0.685 | -     | -    | M         |
| 7  | 798.97  | 0.508 | -1.00 | 0.00 | S         | 21 | 1433.62 | 0.810 | -     | -    | M         |
| 8  | 838.64  | 0.691 | -     | -    | M         | 22 | 1487.45 | 0.550 | -1.00 | 0.00 | S         |
| 9  | 920.80  | 0.585 | -1.00 | 0.00 | S         | 23 | 1551.20 | 0.362 | -1.00 | 0.00 | VS        |
| 10 | 950.55  | 0.706 | -     | -    | M         | 24 | 1592.28 | 0.538 | -1.00 | 0.00 | S         |
| 11 | 1011.47 | 0.554 | -1.00 | 0.00 | S         | 25 | 1617.78 | 0.685 | -     | -    | M         |
| 12 | 1087.96 | 0.431 | -1.00 | 0.00 | S         | 26 | 1667.36 | 0.581 | -1.00 | 0.00 | S         |
| 13 | 1157.38 | 0.734 | -     | -    | M         | 27 | 2847.41 | 0.884 | -     | -    | W         |
| 14 | 1209.79 | 0.609 | -     | -    | S         | 28 | 2921.07 | 0.892 | -     | -    | W         |

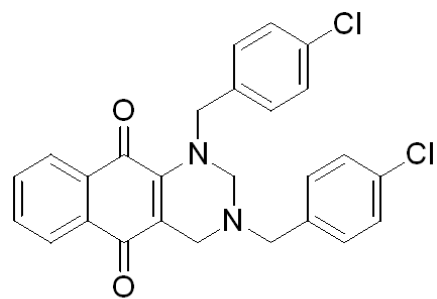

24

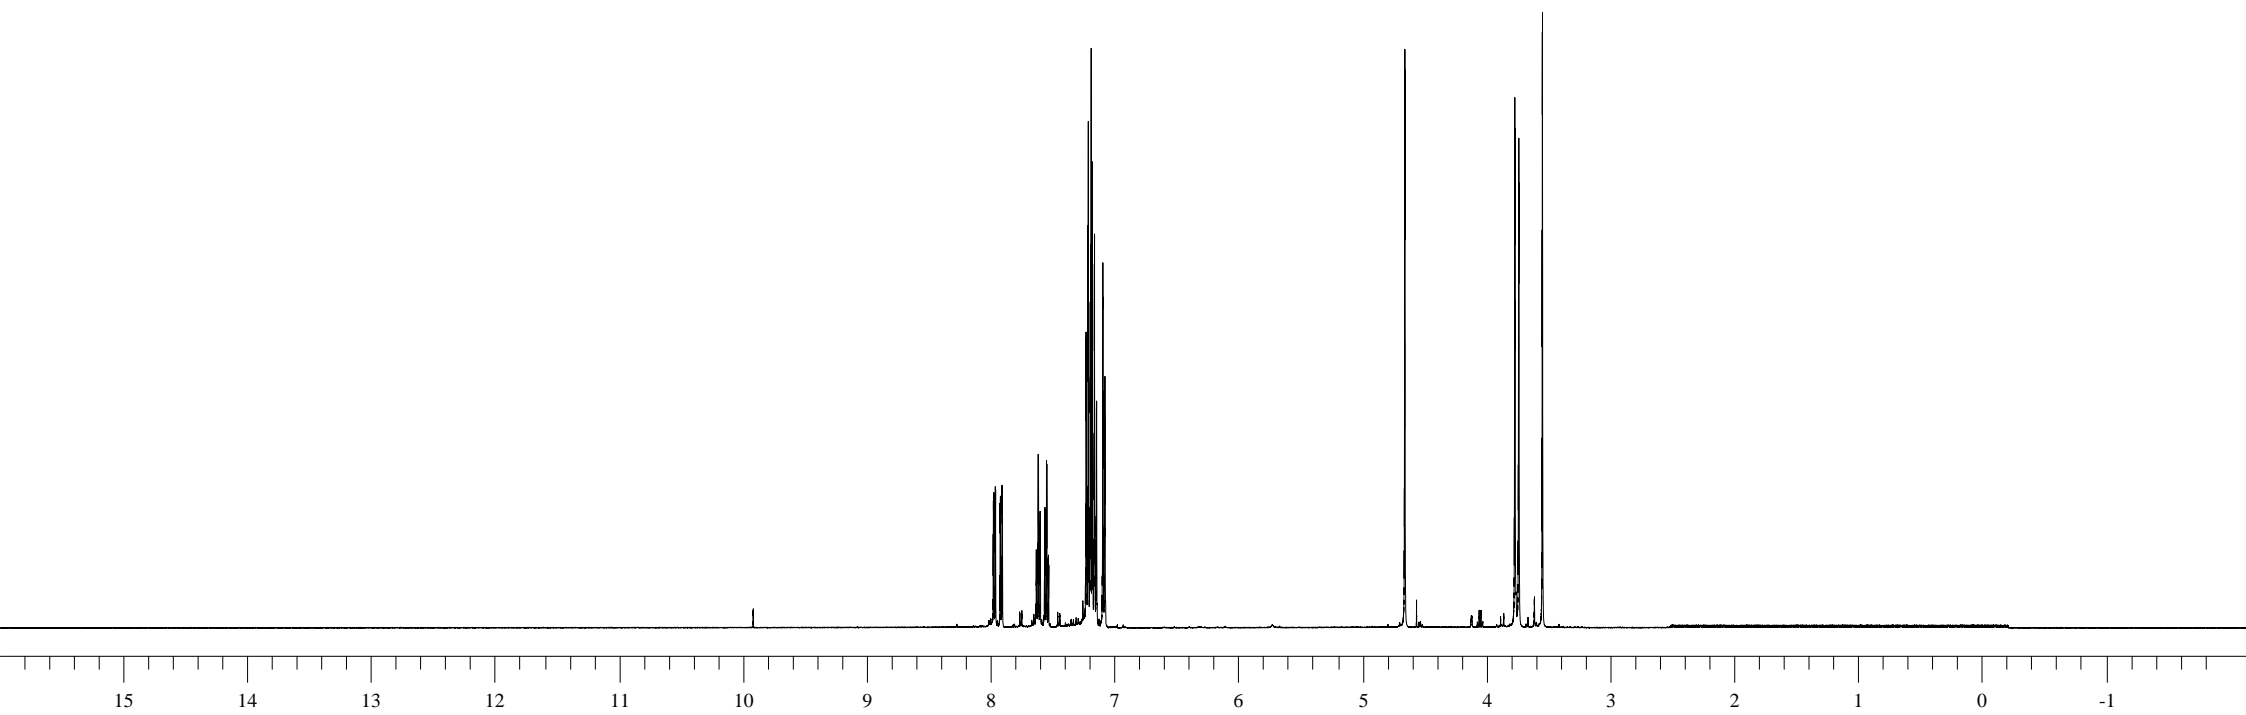

S69

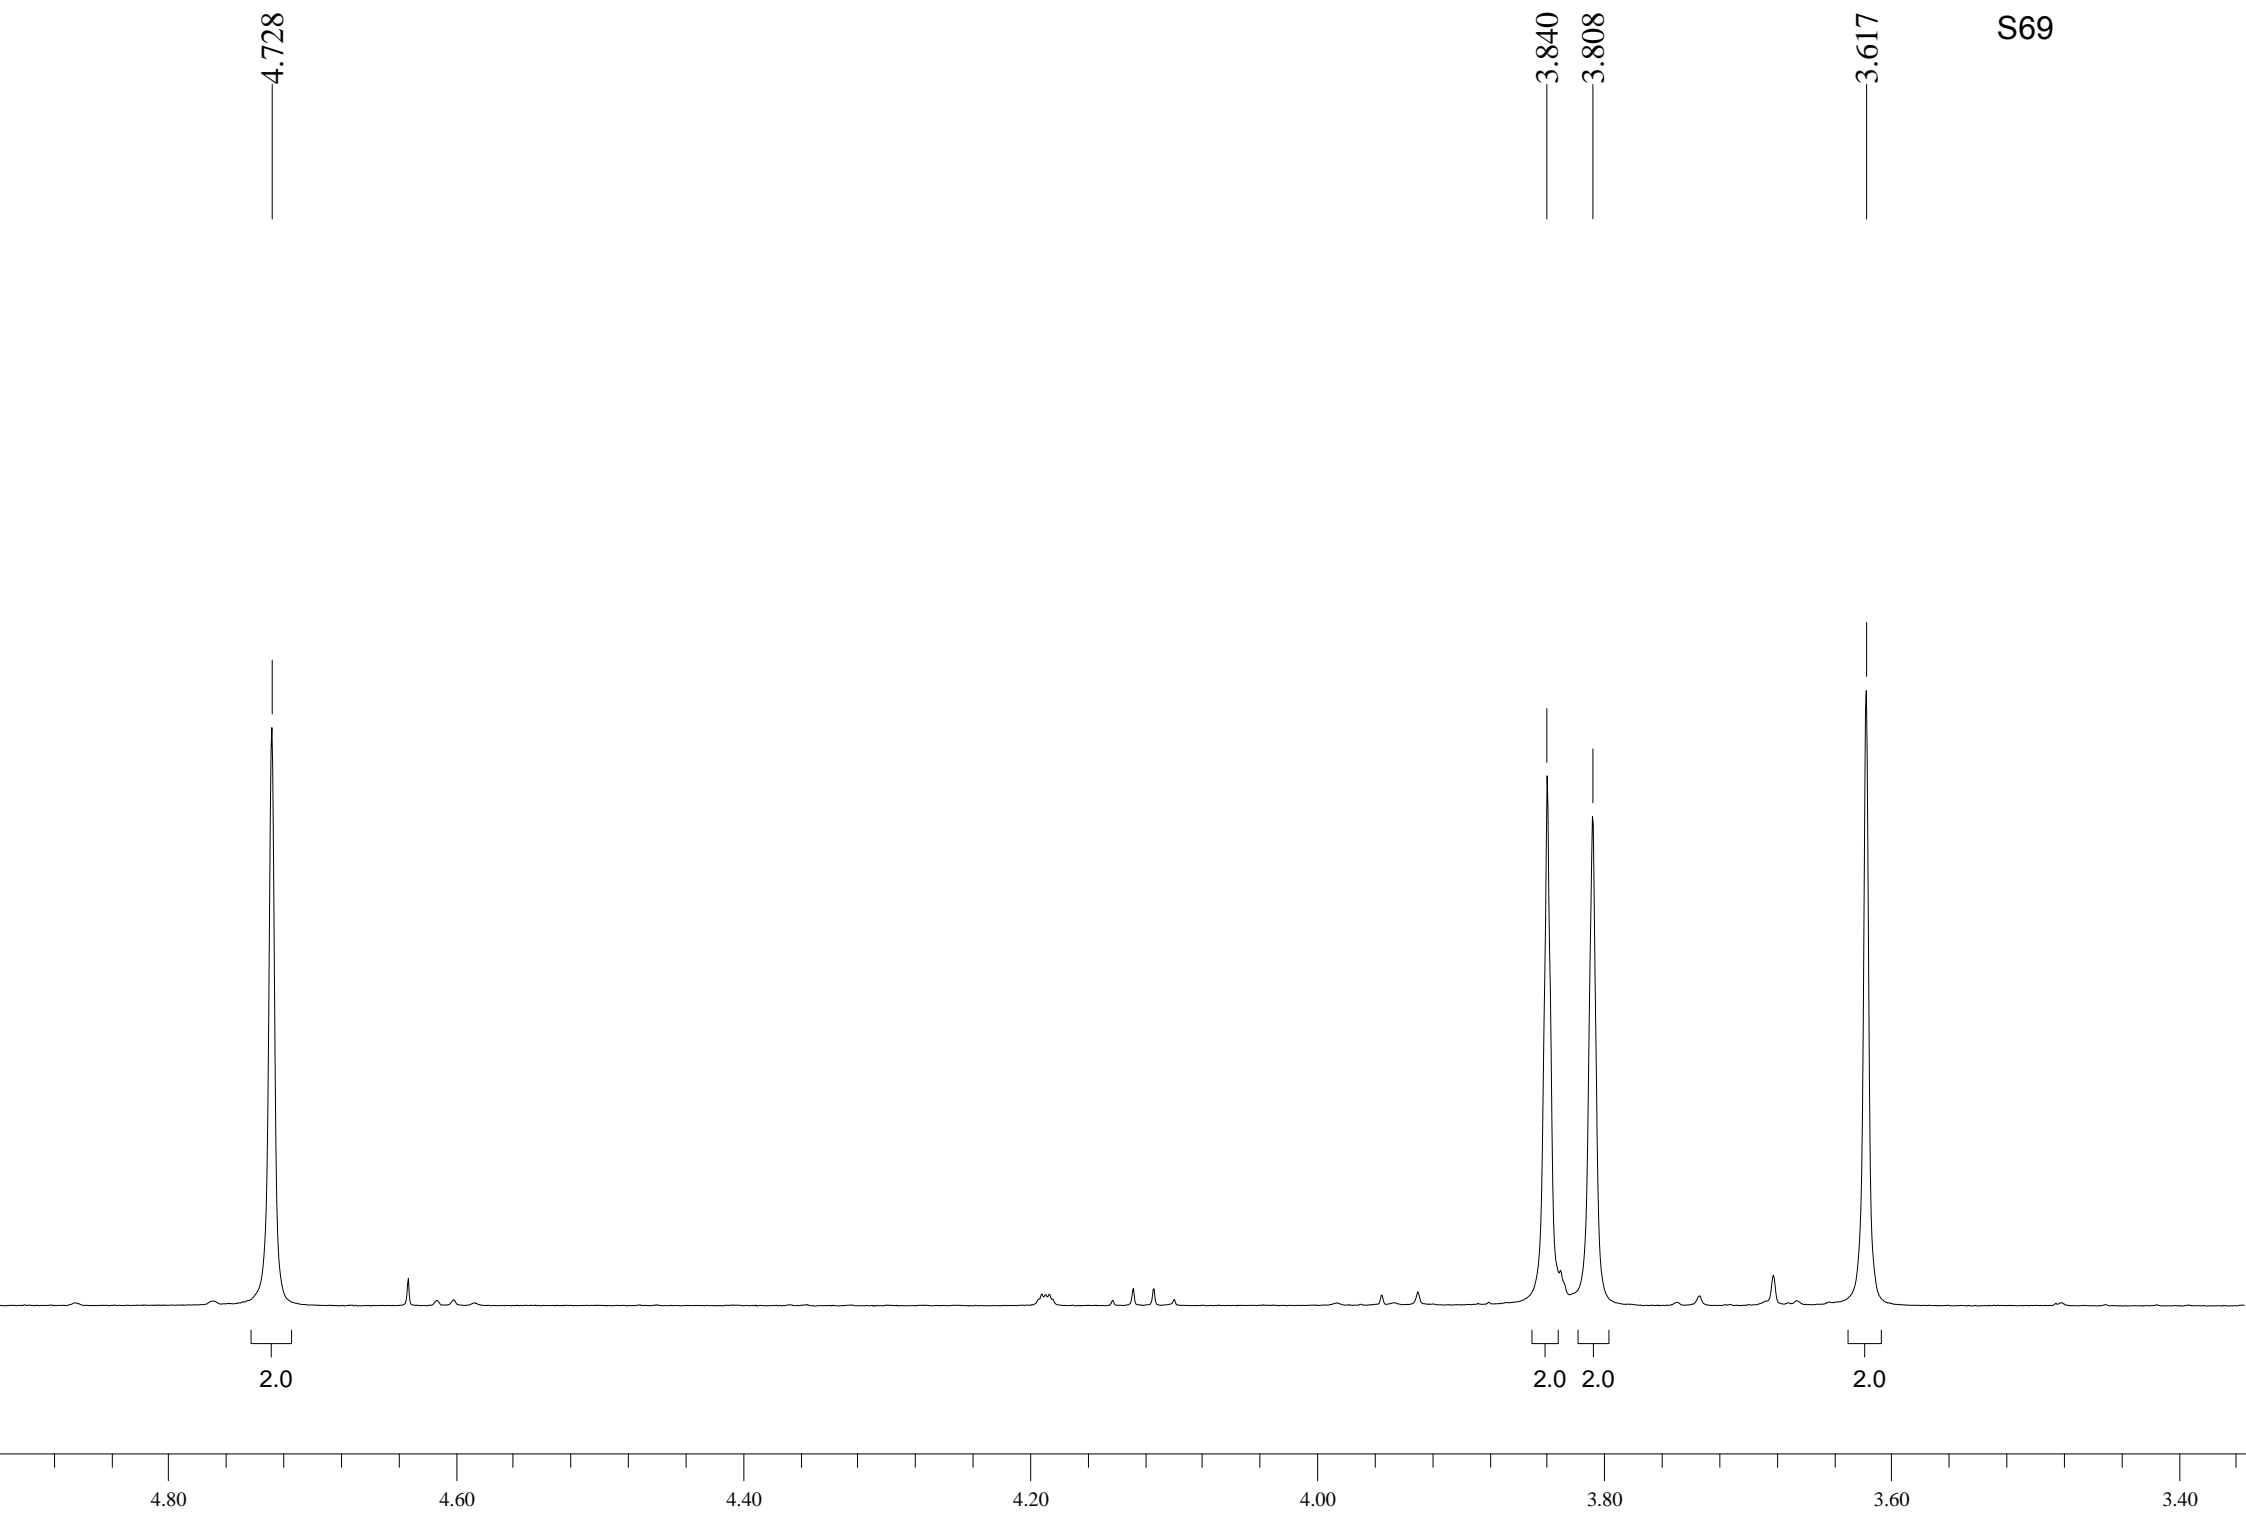

8.048  
8.046  
8.033  
8.030  
7.993  
7.991  
7.978  
7.975

7.701  
7.699  
7.686  
7.684  
7.672  
7.669  
7.635  
7.632  
7.619  
7.617  
7.604  
7.602

7.300  
7.283  
7.266  
7.260  
7.250  
7.232  
7.215  
6.79  
7.164  
7.147

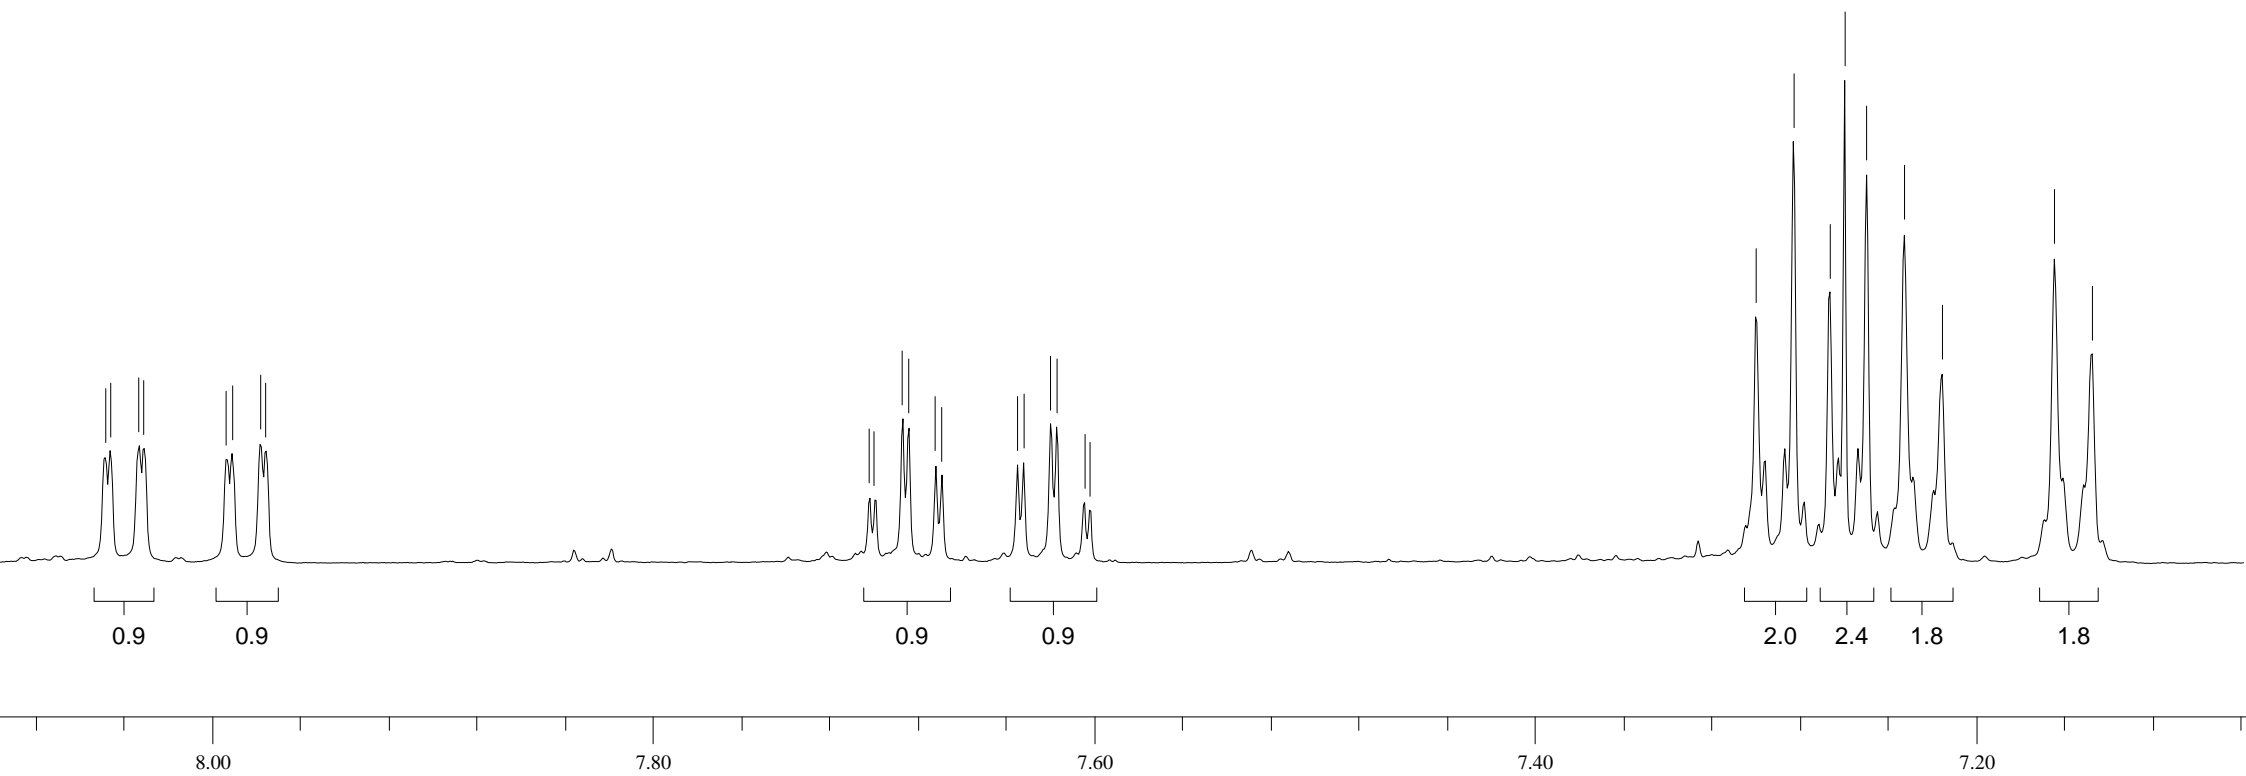

182.014  
181.422

146.722

136.151  
135.856  
133.961  
133.413  
133.236  
132.287  
132.007  
130.067  
129.149  
128.735  
128.557  
126.319  
125.419  
116.774

68.641

56.946

54.063

48.823

S71

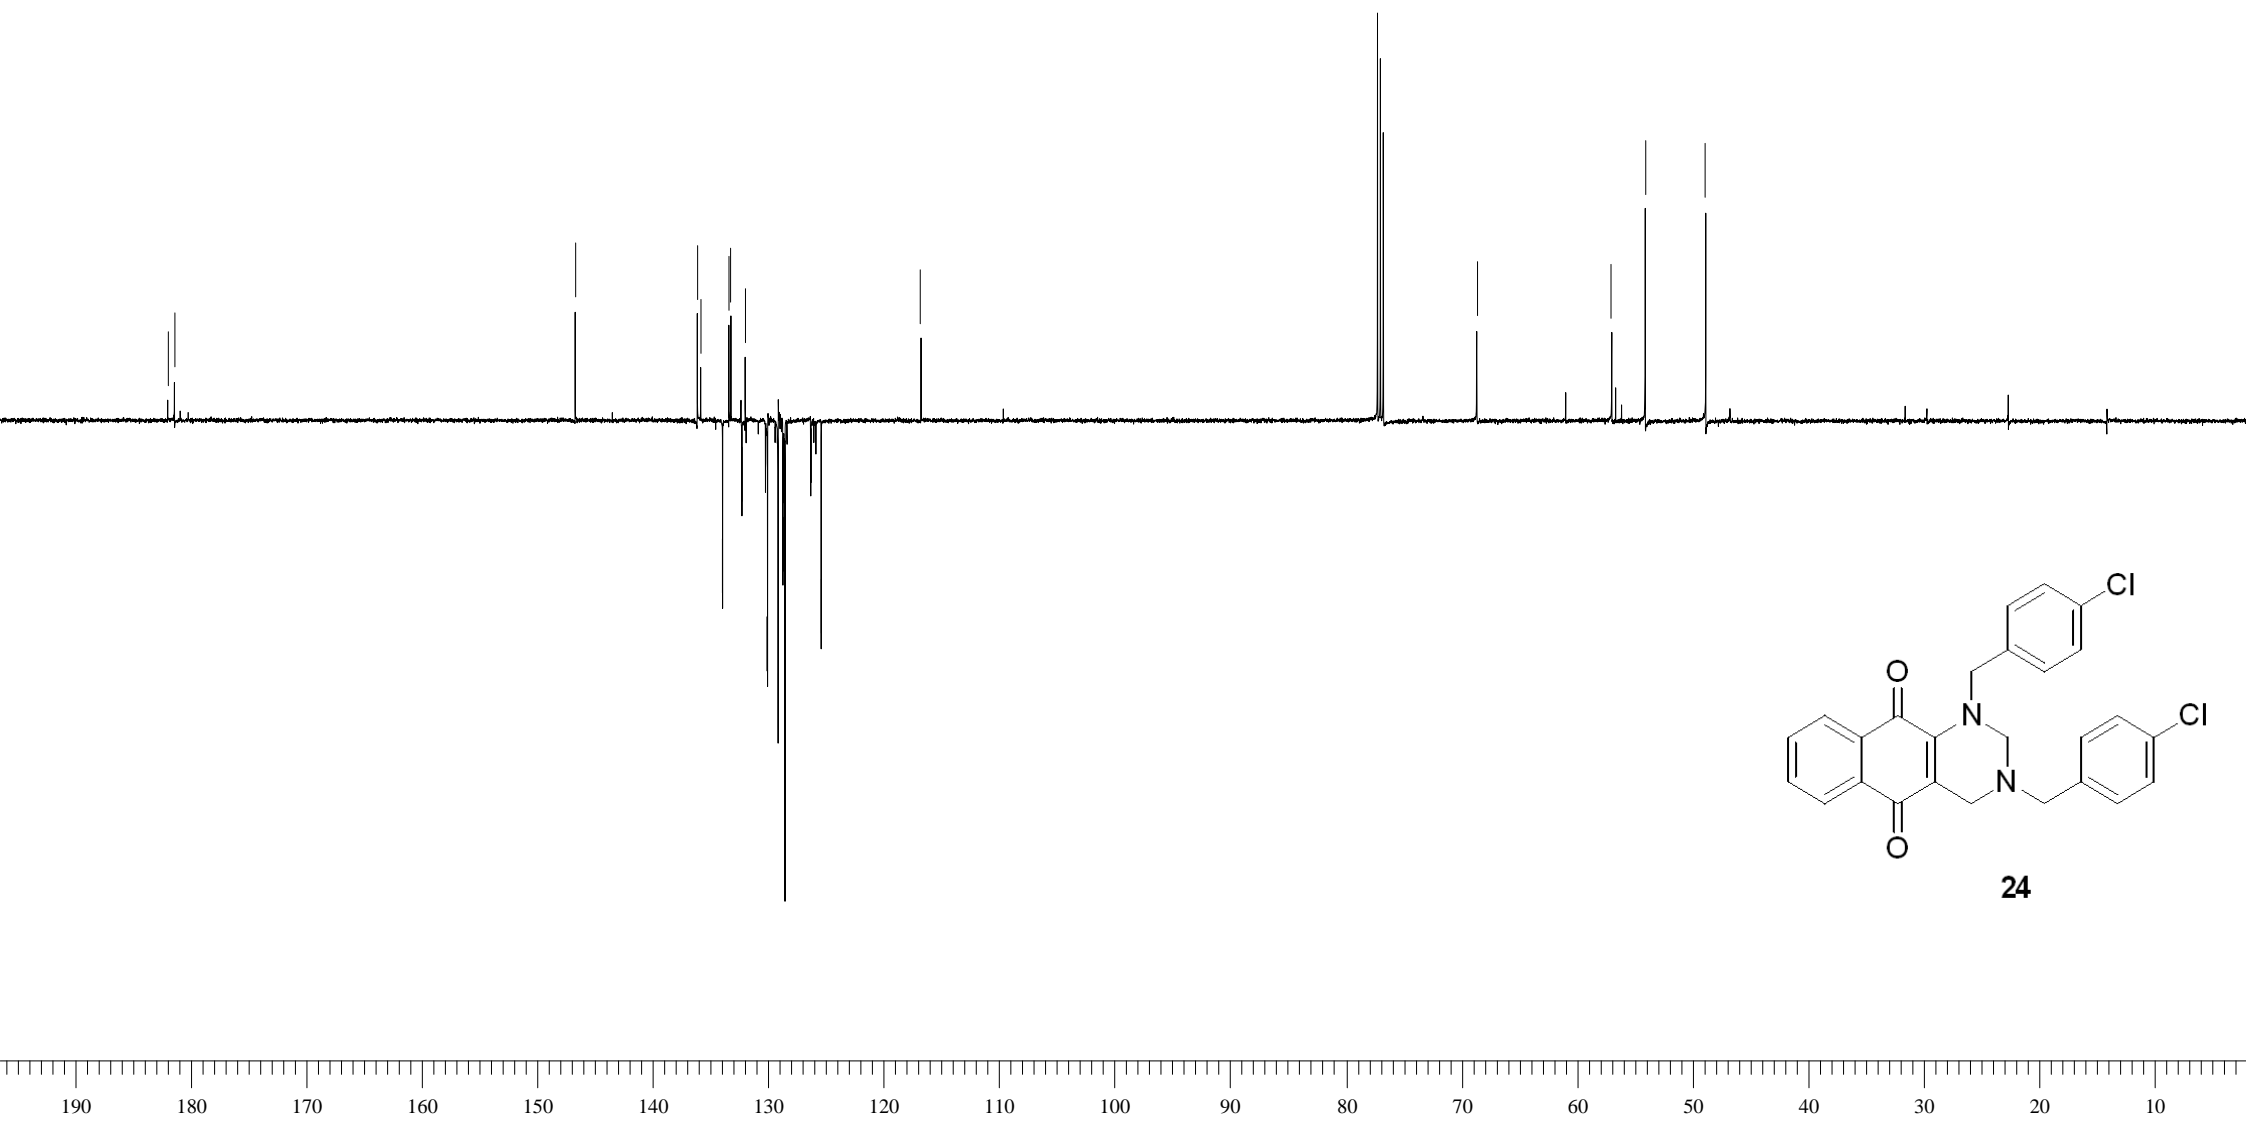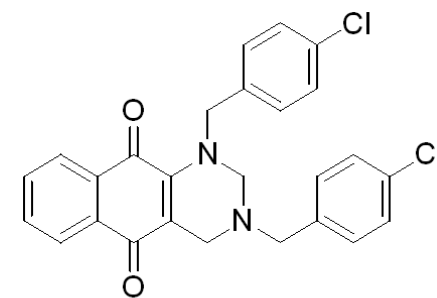

24



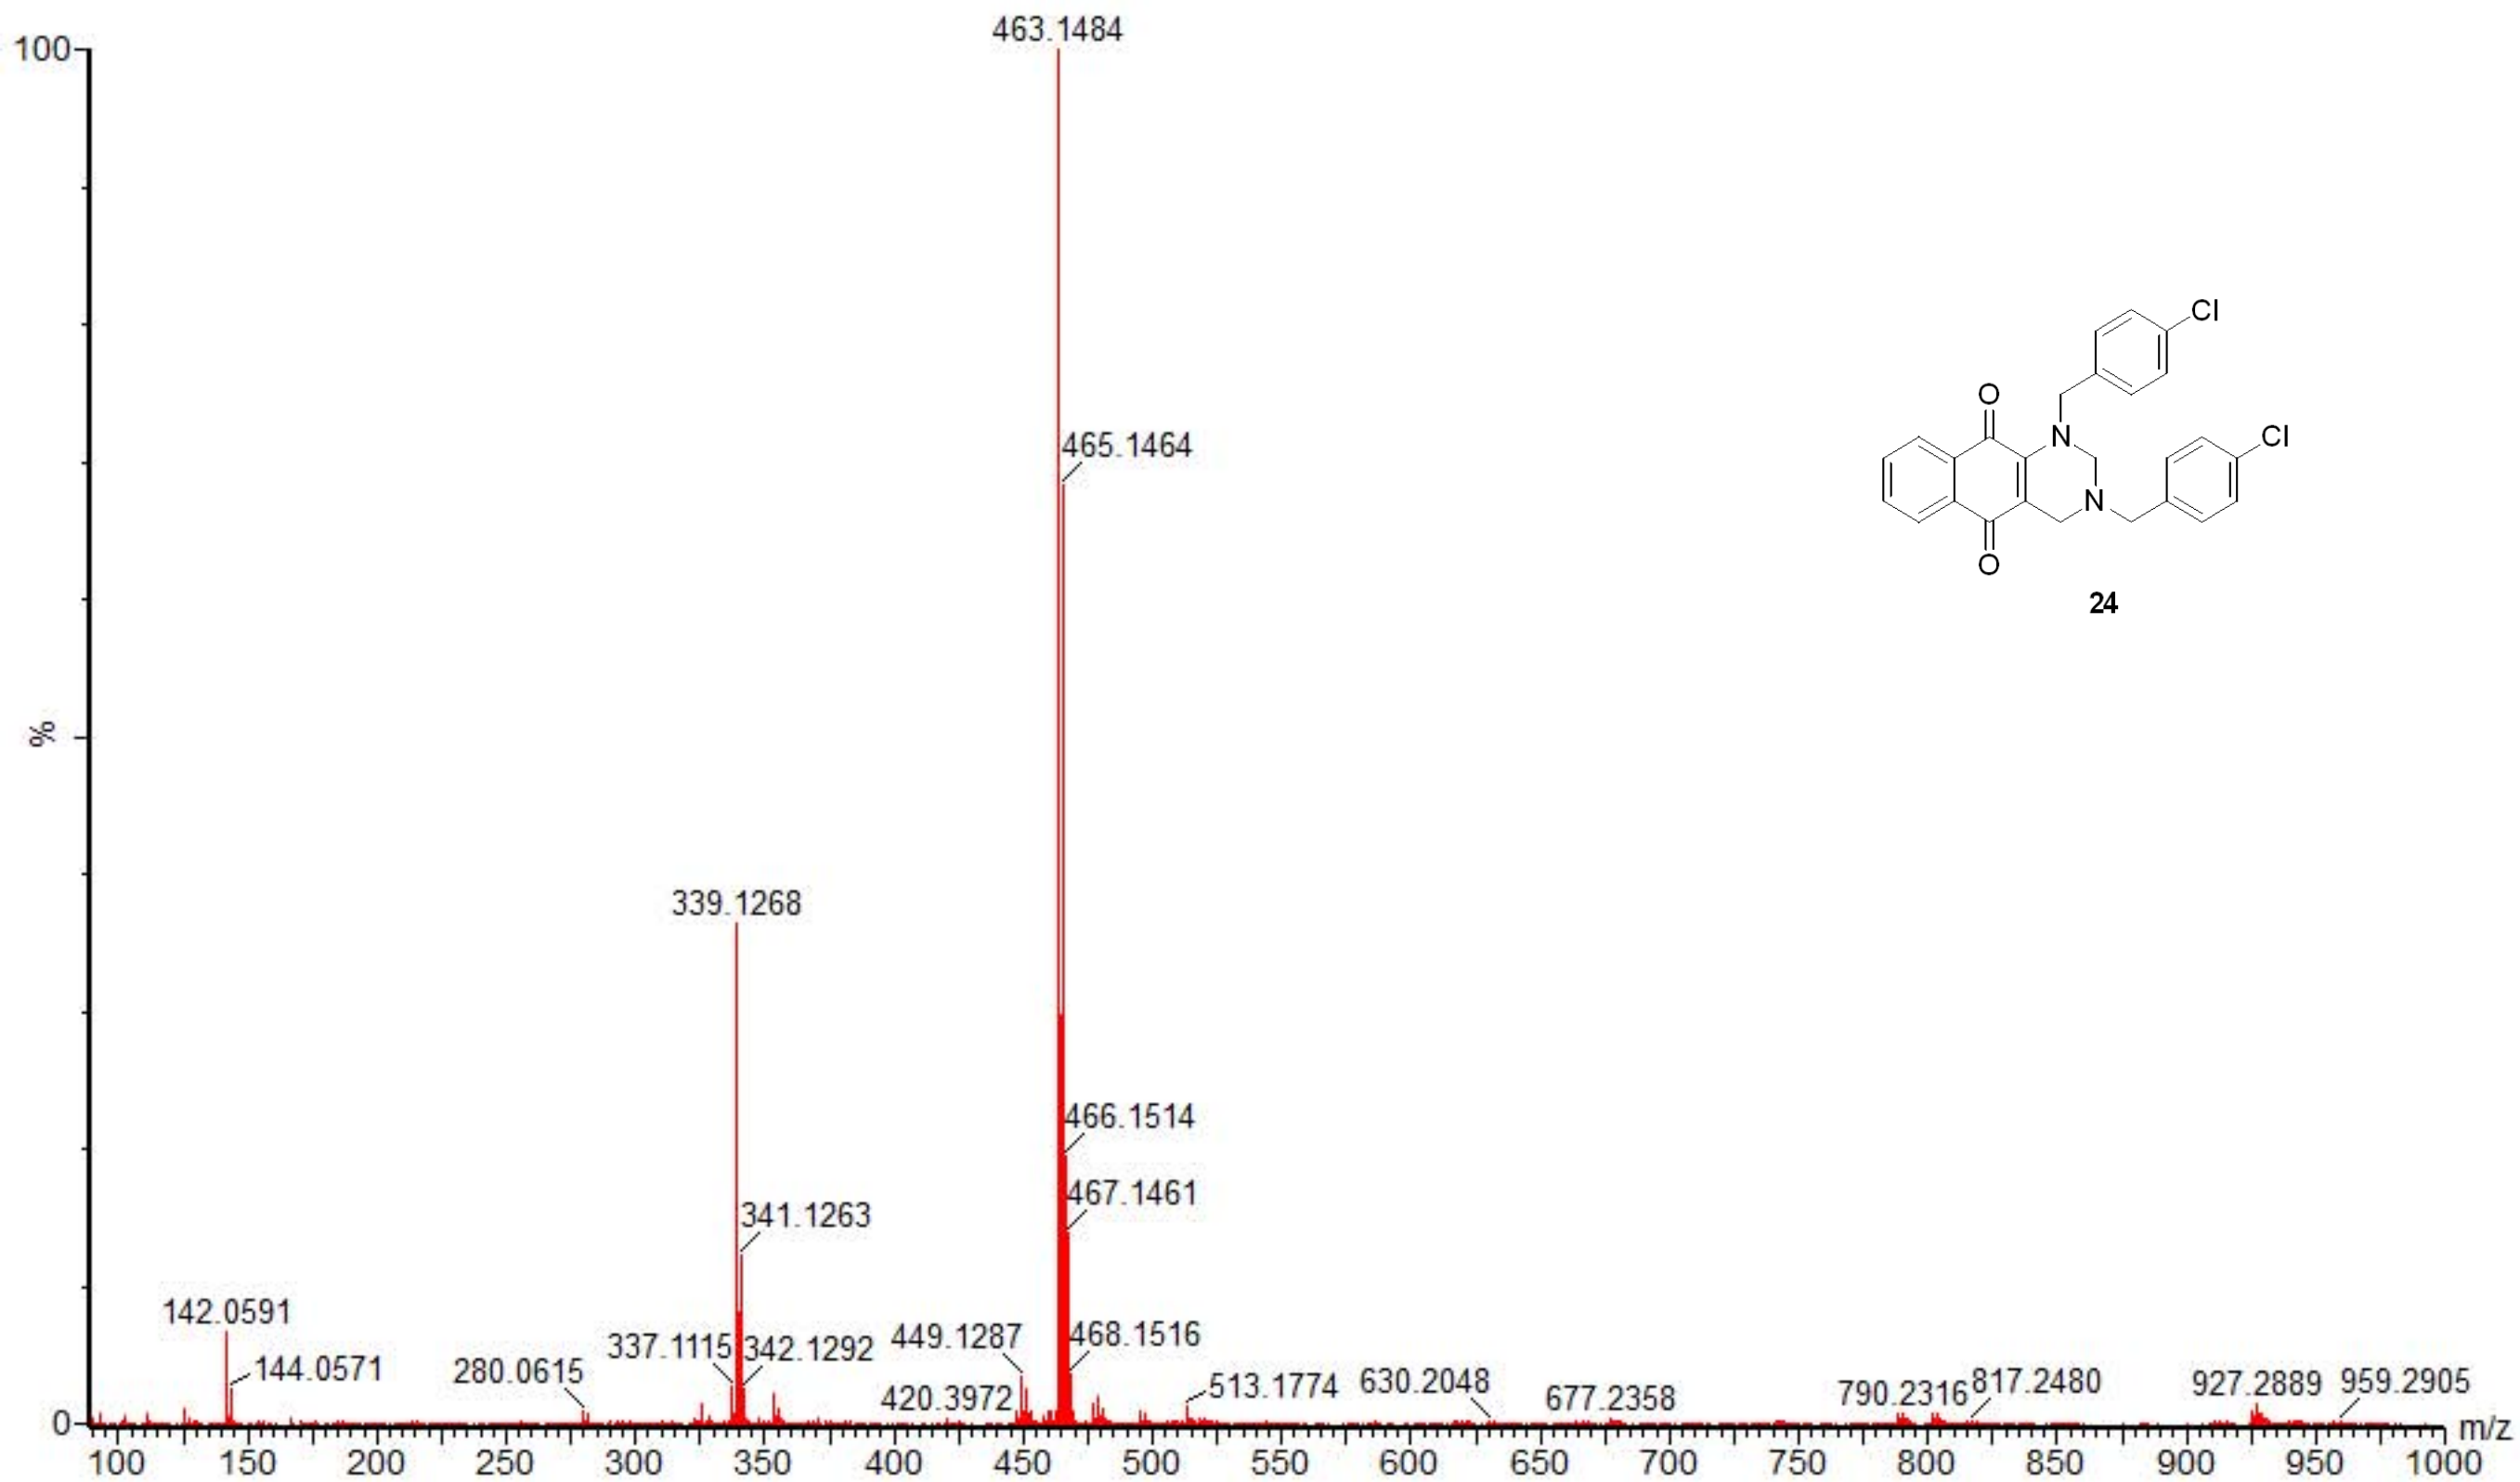



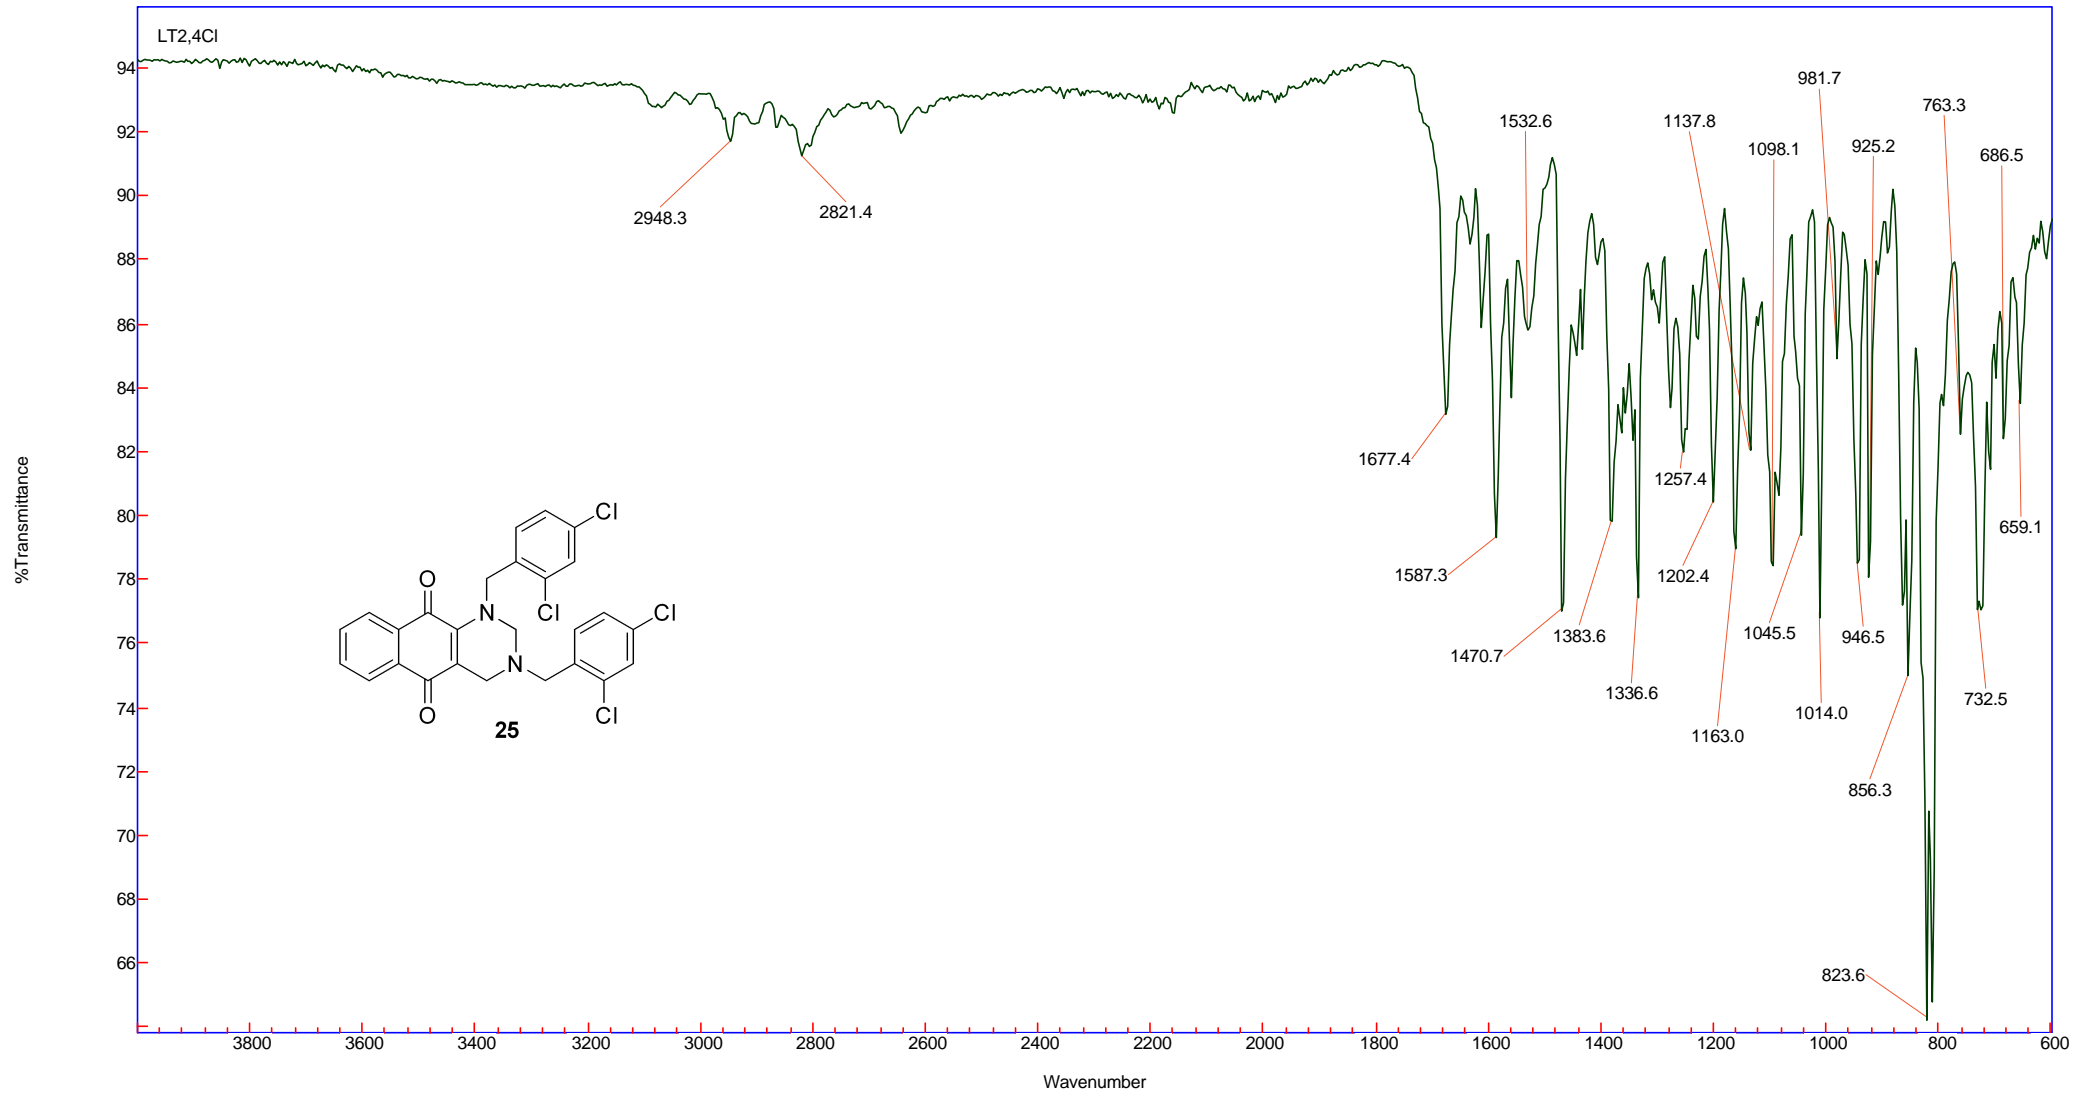

|         |   |
|---------|---|
| Name    |   |
| LT2,4Cl | — |

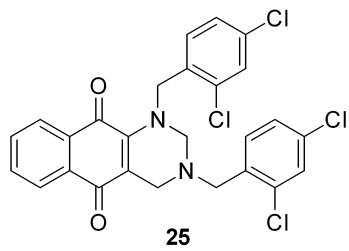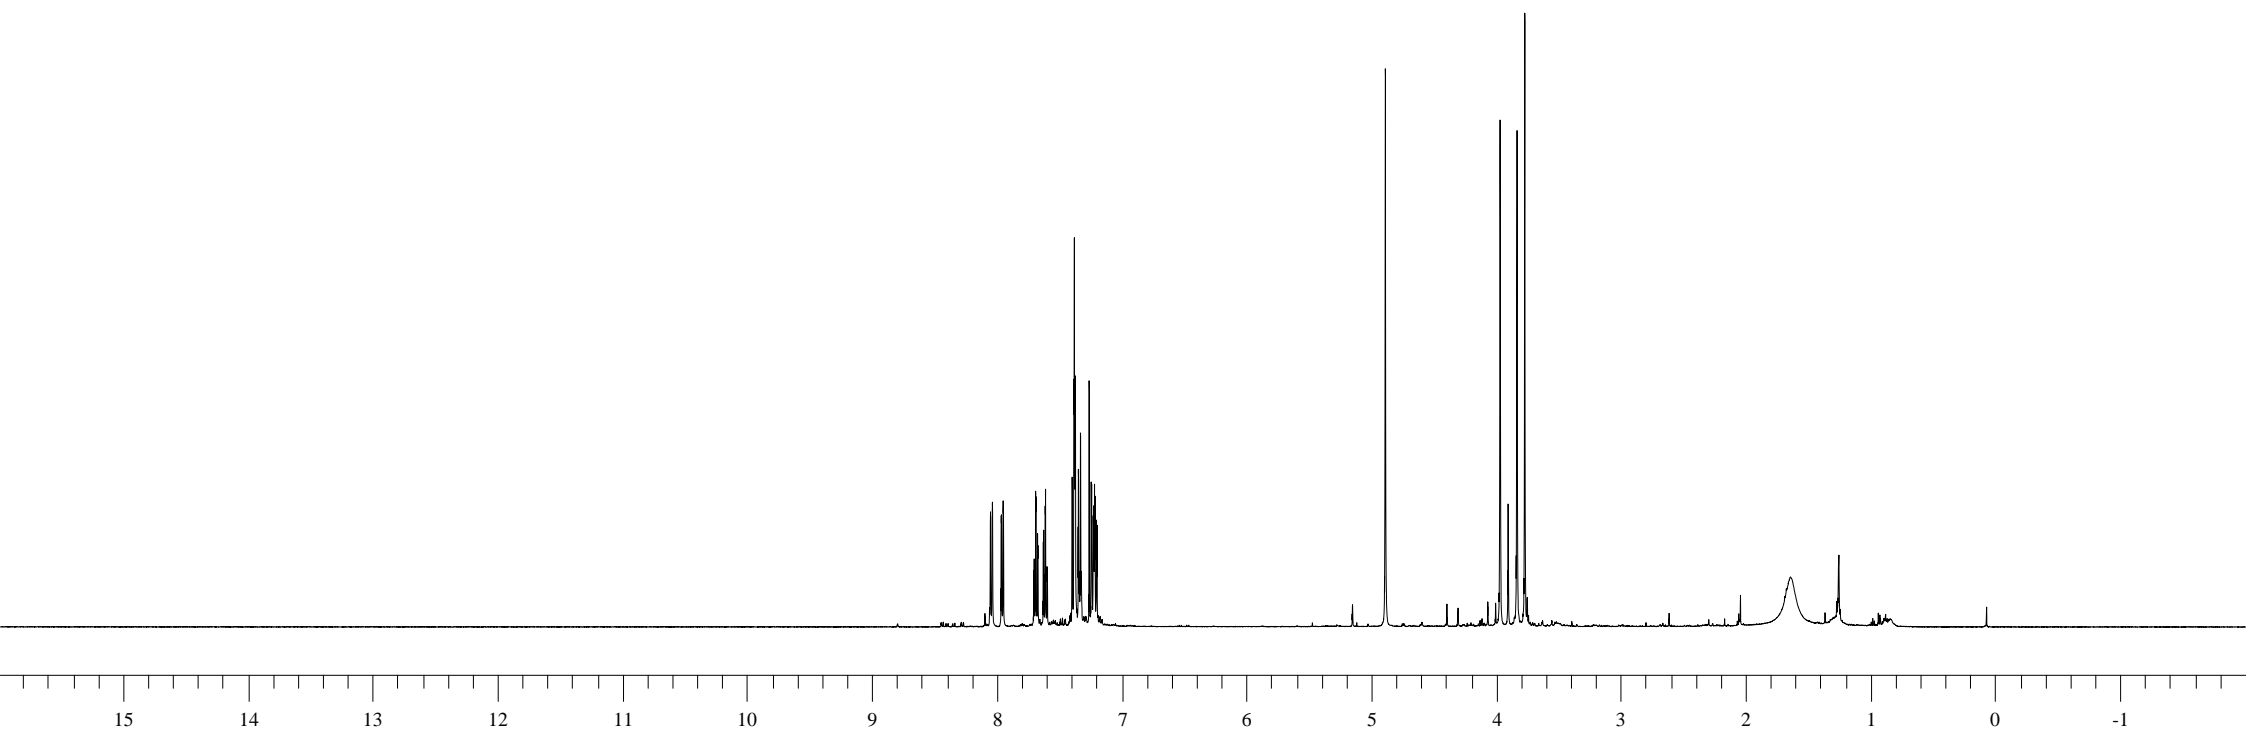

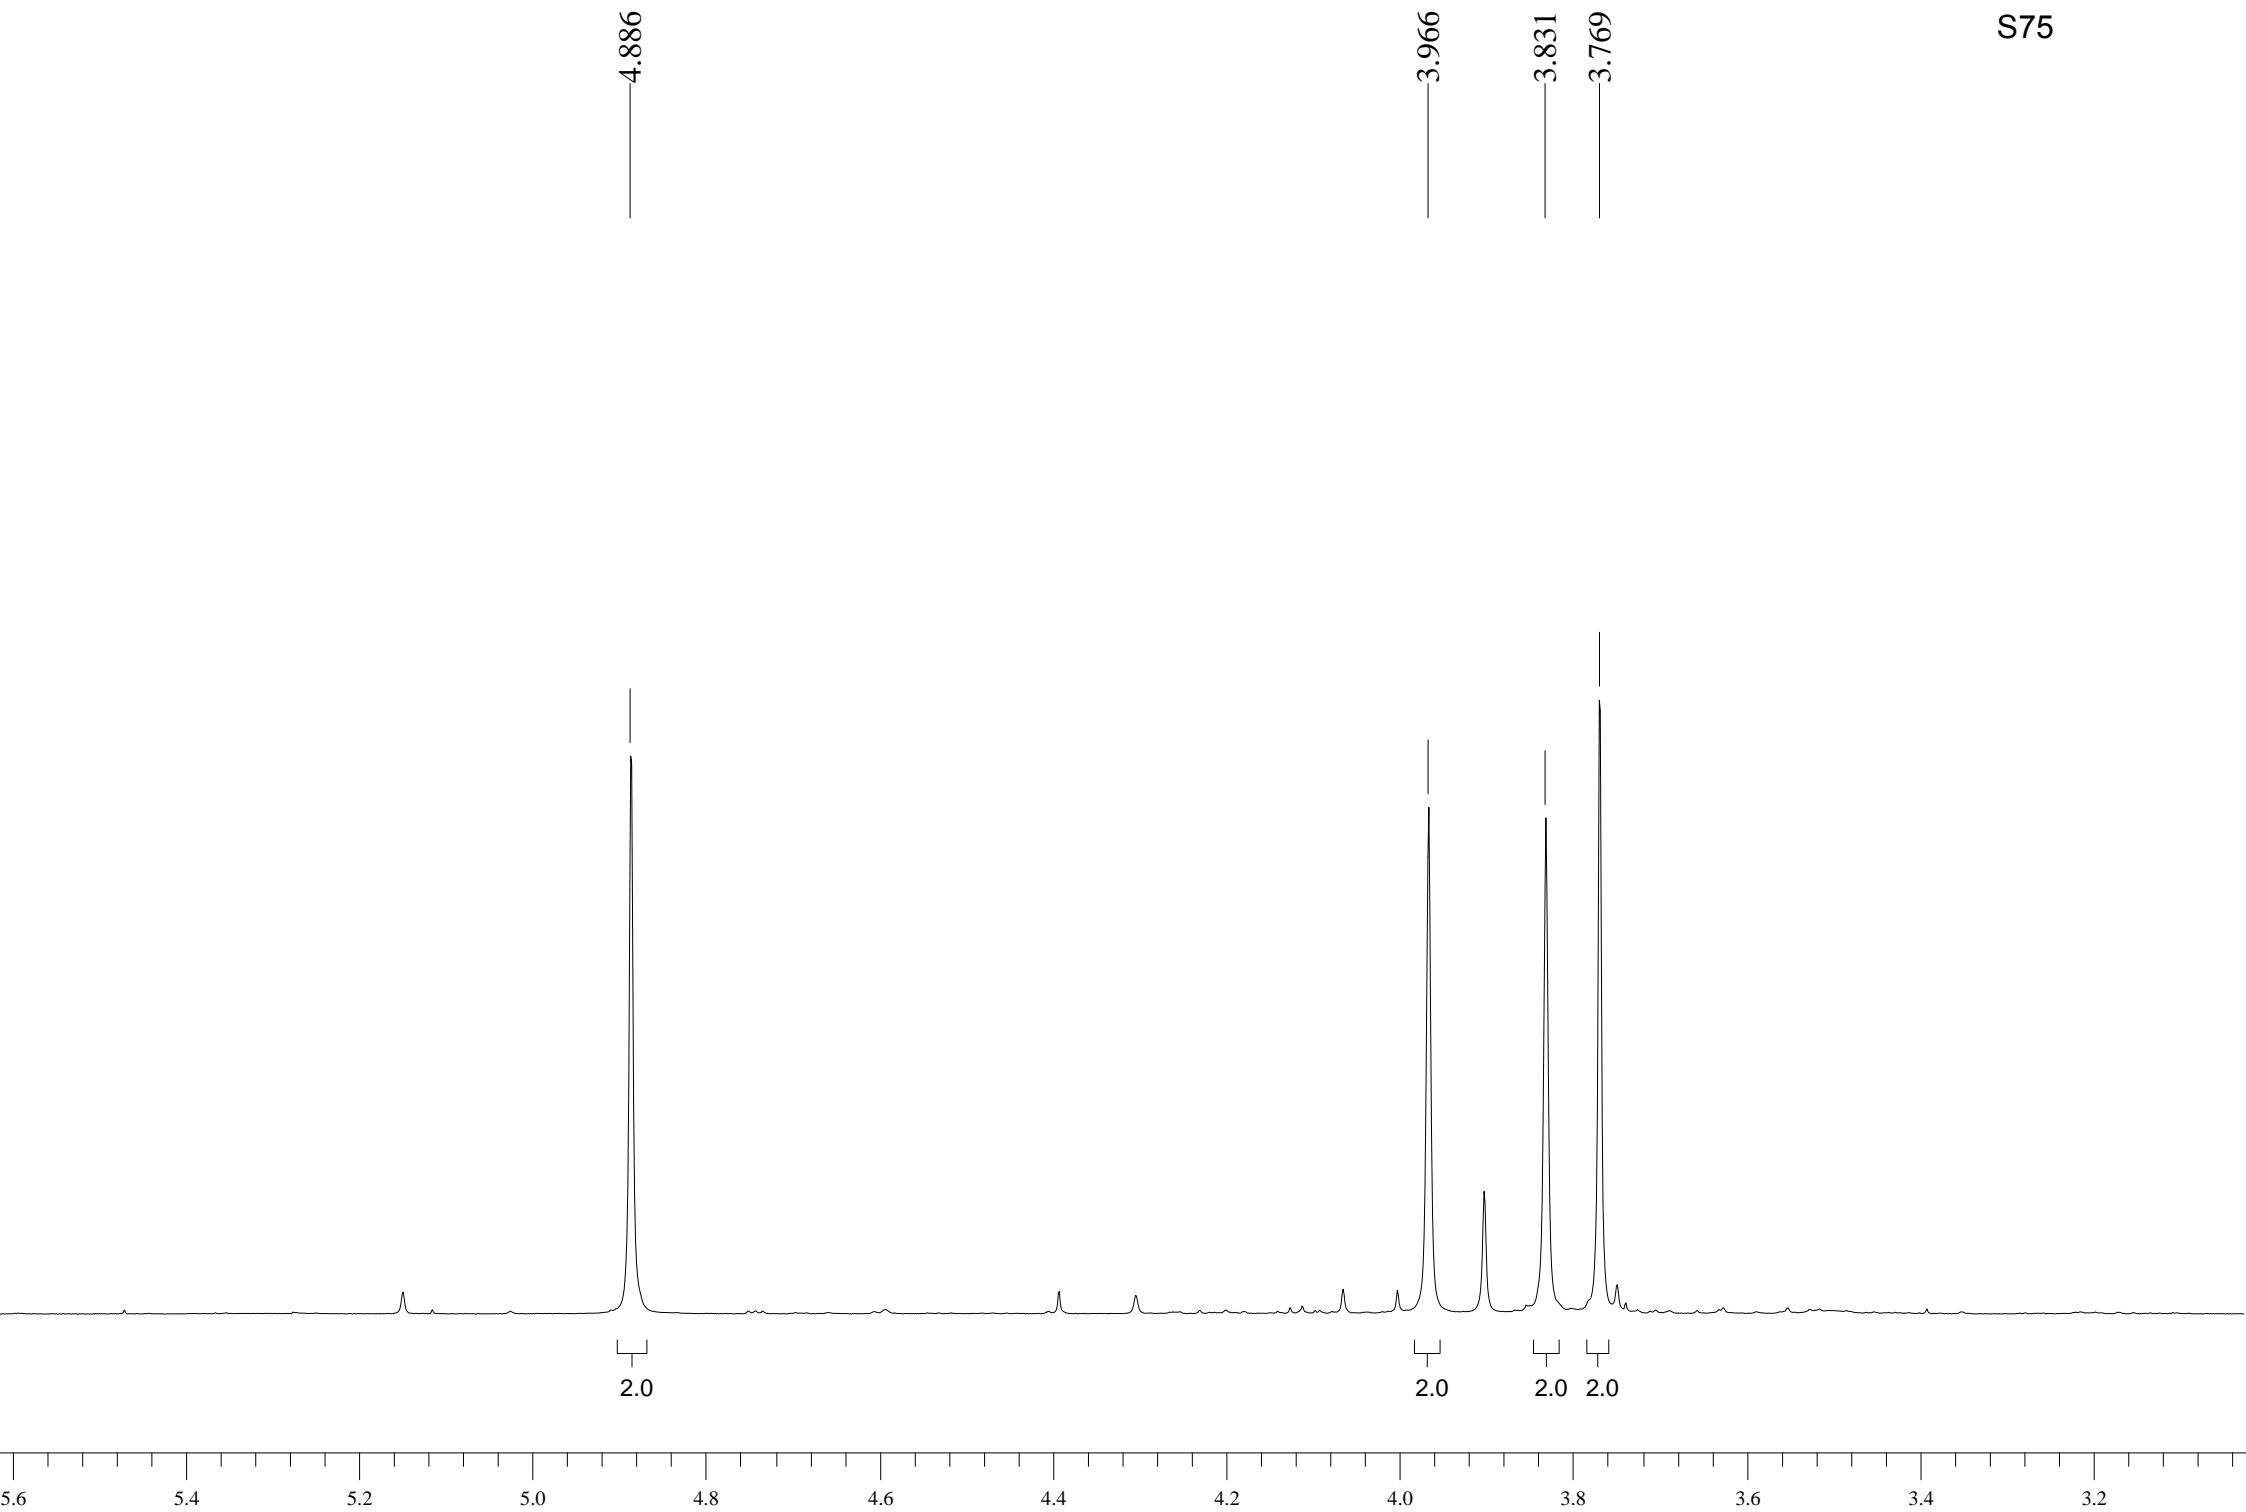

8.049  
8.033

7.963  
7.961  
7.948  
7.946

7.702  
7.700  
7.688  
7.684  
7.672  
7.670  
7.626  
7.624  
7.610  
7.609  
7.597  
7.594

7.395  
7.378  
7.372  
7.369  
7.345  
7.328

7.259  
7.243  
7.239  
7.226  
7.222  
7.217  
7.214  
7.200  
7.196

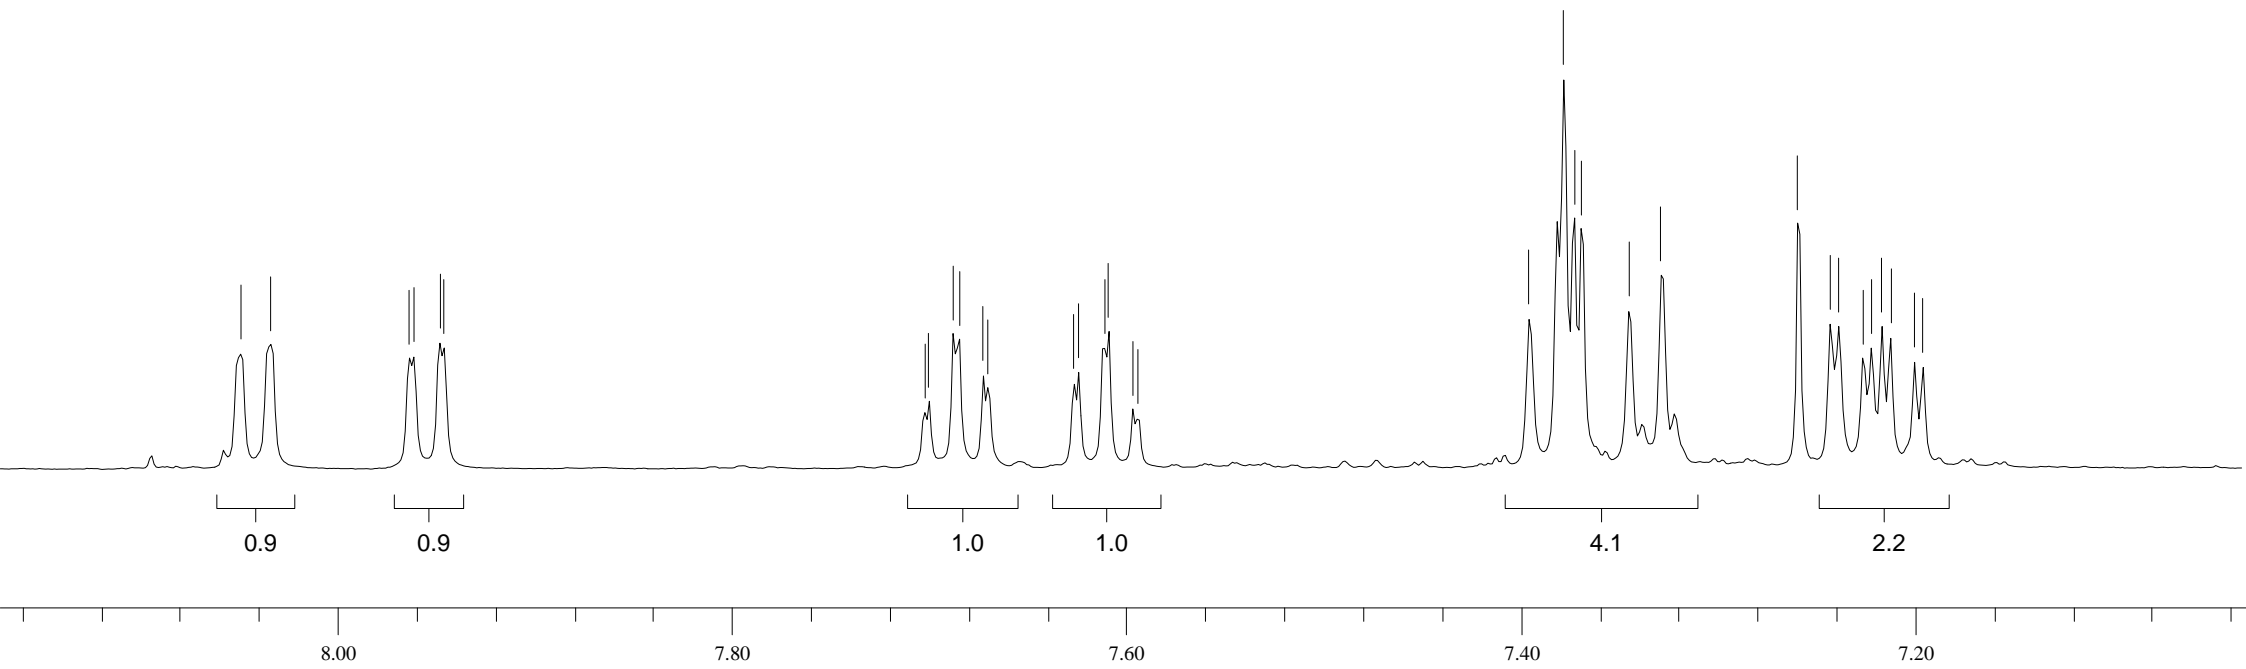

181.729  
181.305  
146.533  
134.656  
133.922  
133.855  
133.664  
133.628  
133.483  
133.322  
132.246  
132.208  
131.746  
130.941  
129.606  
129.341  
129.242  
129.210  
127.307  
127.042  
126.267  
125.357  
116.471

69.911

54.150  
51.989  
48.356

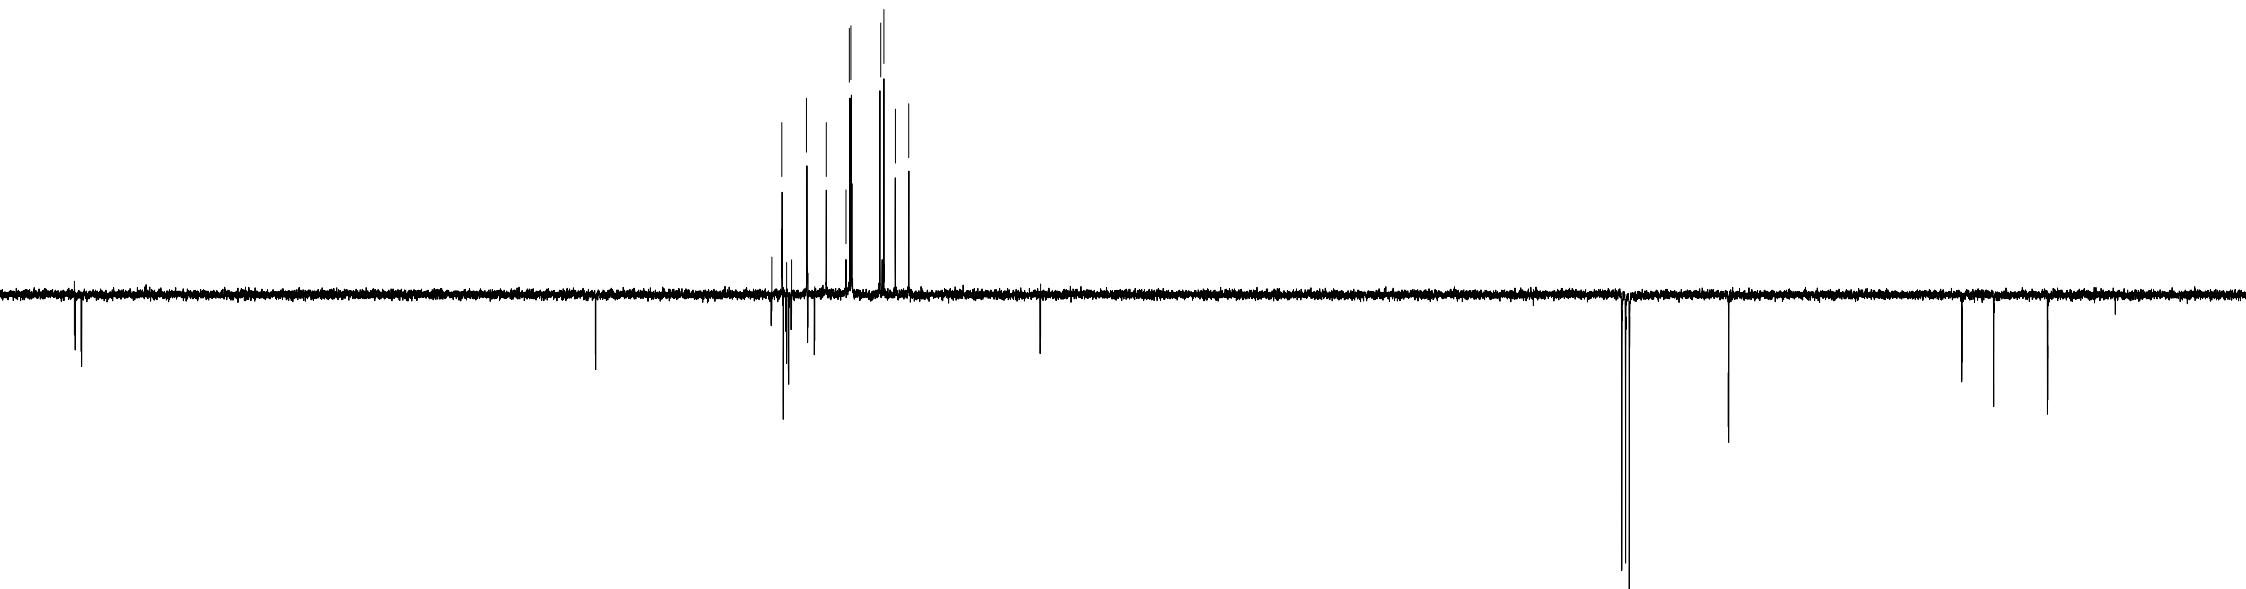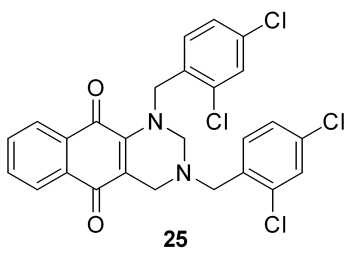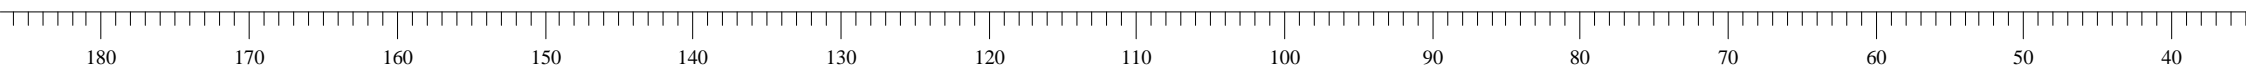

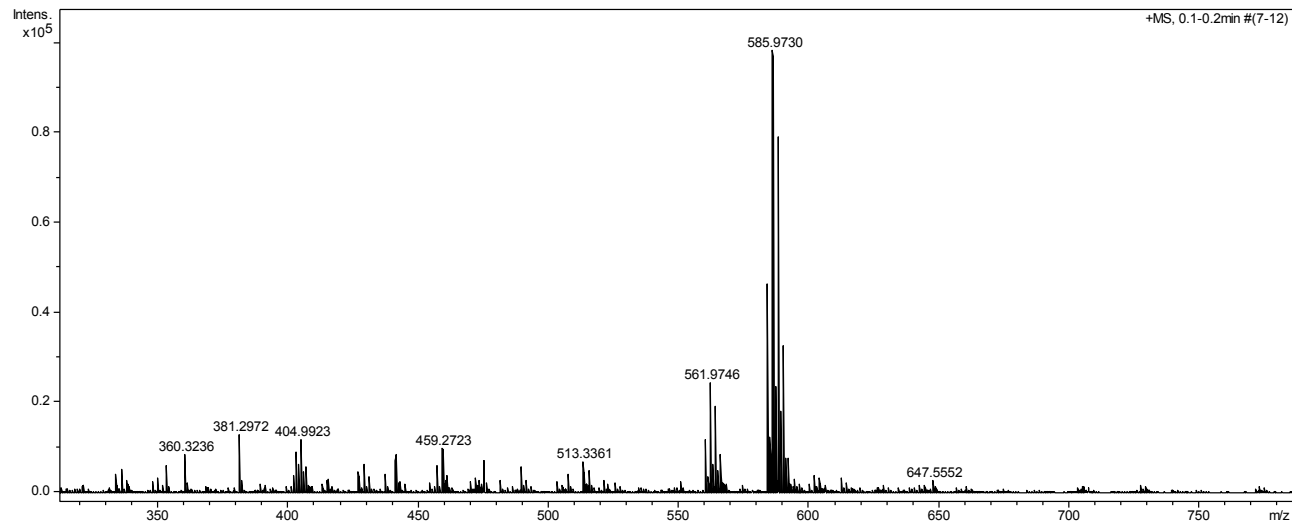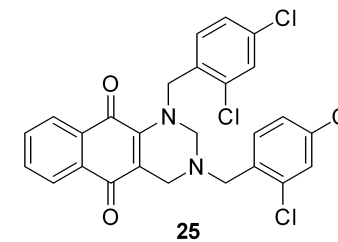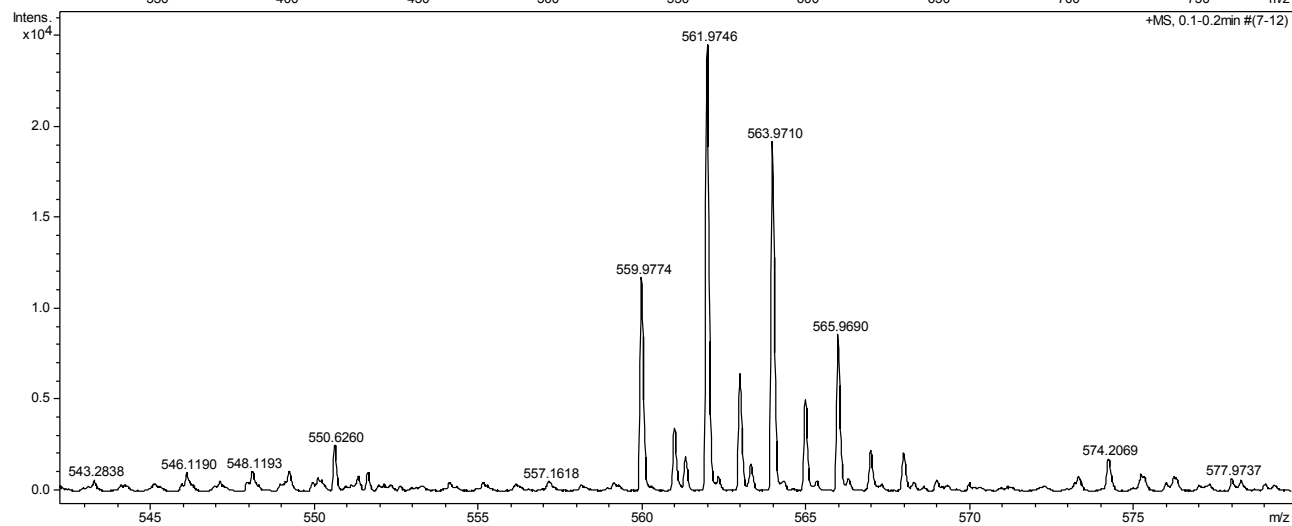

Supplement: Additional file 1 [file 1860-5397-11-137-S1.pdf]
